# Supplementary material for: MCAM: Multiple Clustering Analysis Methodology for Deriving Hypotheses and Insights from High-Throughput Proteomic Datasets
Source: PubMed Central journal article supplement (PMC3140961; doi:10.1371/journal.pcbi.1002119), 2011-07-21

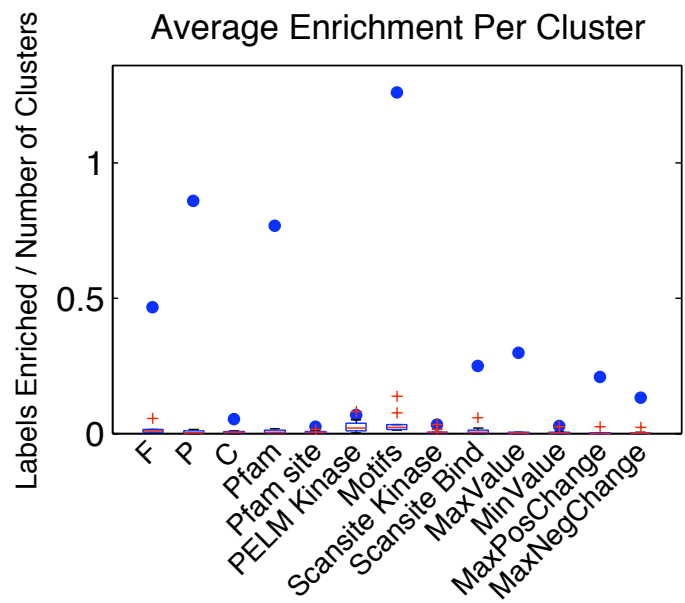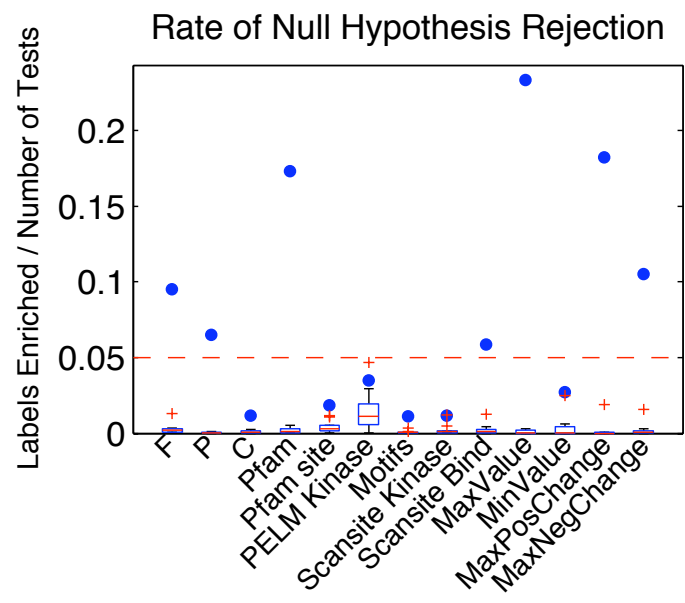

Supplement: pcbi.1002119.s002.pdf [file pcbi.1002119.s002.pdf]
