# Supplementary material for: MCAM: Multiple Clustering Analysis Methodology for Deriving Hypotheses and Insights from High-Throughput Proteomic Datasets
Source: PLoS Comput Biol. 2011 Jul 21;7(7):e1002119. doi: 10.1371/journal.pcbi.1002119 (PMC3140961; doi:10.1371/journal.pcbi.1002119)
Supplement: Table S1 — Exploration of parameter relationships through mutual information. Average MI is calculated for subsets of based on a single parameter type. Similarity between two parameters is also considered by finding the average MI of a subset containing only two parameter types. This supplementary information contains graphs and tables of the average MI by subset. (XLSX) [file pcbi.1002119.s006.xlsx]

## Sheet: transformations
	FFT	center	log10	normMax	normMax_log10	pareto	pow	rangeScale	raw	zscore
FFT	1.4729	1.3735	1.1941	1.3305	1.1772	1.2645	1.2776	1.093	1.3376	1.266
center	1.3735	1.3836	1.178	1.3319	1.1604	1.2989	1.275	1.0779	1.3258	1.2931
log10	1.1941	1.178	1.3626	1.2353	1.2939	1.1555	1.3177	1.0131	1.2335	1.1424
normMax	1.3305	1.3319	1.2353	1.403	1.2178	1.3032	1.322	1.0995	1.3509	1.2995
normMax_log10	1.1772	1.1604	1.2939	1.2178	1.3124	1.1088	1.2585	1.0287	1.1852	1.0949
pareto	1.2645	1.2989	1.1555	1.3032	1.1088	1.3771	1.2683	1.0088	1.3257	1.3973
pow	1.2776	1.275	1.3177	1.322	1.2585	1.2683	1.4152	1.0652	1.3479	1.2744
rangeScale	1.093	1.0779	1.0131	1.0995	1.0287	1.0088	1.0652	1.0969	1.0915	1.0043
raw	1.3376	1.3258	1.2335	1.3509	1.1852	1.3257	1.3479	1.0915	1.4537	1.3288
zscore	1.266	1.2931	1.1424	1.2995	1.0949	1.3973	1.2744	1.0043	1.3288	1.4874
Example rankings swap to compare most like transformations.
	log10			pareto
rangeScale	1.0131		rangeScale	1.0088
zscore	1.1424		normMax_log10	1.1088
pareto	1.1555		log10	1.1555
center	1.178		FFT	1.2645
FFT	1.1941		pow	1.2683
raw	1.2335		center	1.2989
normMax	1.2353		normMax	1.3032
normMax_log10	1.2939		raw	1.3257
pow	1.3177		pareto	1.3771
log10	1.3626		zscore	1.3973

## Sheet: algorithms
	clusterAP	clusterKmeans	clusterNcut	clusterSOM
clusterAP	1.4791	1.3241	1.1202	1.0208
clusterKmeans	1.3241	1.289	1.1371	1.1041
clusterNcut	1.1202	1.1371	1.0658	0.9812
clusterSOM	1.0208	1.1041	0.9812	0.8266

## Sheet: distances
	chebychev	cityblock	euclidean
chebychev	1.1035	1.1537	1.0582
cityblock	1.1537	1.2039	1.1074
euclidean	1.0582	1.1074	1.0519
