# Supplementary material for: MCAM: Multiple Clustering Analysis Methodology for Deriving Hypotheses and Insights from High-Throughput Proteomic Datasets
Source: PLoS Comput Biol. 2011 Jul 21;7(7):e1002119. doi: 10.1371/journal.pcbi.1002119 (PMC3140961; doi:10.1371/journal.pcbi.1002119)
Supplement: Table S2 — List of all enrichment produced in and the number of times it appeared as enriched in the 331 sets. (XLSX) [file pcbi.1002119.s007.xlsx]

## Sheet: proteinLevelTerms
F		P		C		PFAM
Label	NumberEnriched	Label	NumberEnriched	Label	NumberEnriched	Label	NumberEnriched
protein dimerization activity	79	activation of phospholipase C activity	100	lamellipodium	26	VHS	206
DNA binding	76	activation of MAPK activity	86	endosome	22	UIM	205
transcription activator activity	76	Ras protein signal transduction	81	Shc-EGFR complex	19	Ephrin_lbd	188
protein kinase binding	76	cell-cell adhesion	81	basolateral plasma membrane	17	SAM_1	173
transcription factor binding	76	positive regulation of catenin import into nucleus	80	membrane	14	fn3	172
actin filament binding	69	ossification	74	AP-2 adaptor complex	13	Pfam-B_1542	139
double-stranded DNA binding	69	positive regulation of MAP kinase activity	73	caveola	12	STAT_int	137
nitric-oxide synthase regulator activity	68	apoptosis	67	cytosol	10	STAT_bind	136
transmembrane receptor activity	68	T cell receptor signaling pathway	66	soluble fraction	7	STAT_alpha	134
insulin receptor binding	66	MAPKKK cascade	62	perinuclear region of cytoplasm	6	Pfam-B_1577	131
WW domain binding	66	cell surface receptor linked signaling pathway	61	extracellular space	5	SH3_1	99
MAP/ERK kinase kinase activity	63	positive regulation of DNA replication	60	cell surface	4	Pfam-B_1584	97
transmembrane receptor protein tyrosine kinase adaptor activity	62	blood coagulation	59	focal adhesion	4	Pkinase_Tyr	95
protein phosphatase binding	62	positive regulation of protein kinase B signaling cascade	59	nucleoplasm	4	PID	78
phospholipid binding	61	multicellular organismal development	58	coated pit	3	Recep_L_domain	57
identical protein binding	60	positive regulation of cyclin-dependent protein kinase activity involved in G1/S	56	integral to plasma membrane	2	Furin-like	54
insulin-like growth factor receptor binding	60	activation of phospholipase A2 activity by calcium-mediated signaling	56	nucleus	2	Arm	51
epidermal growth factor receptor activity	58	insulin receptor signaling pathway	55	---	1	UBA	43
epidermal growth factor receptor binding	58	response to UV-A	55	ruffle	0	Pkinase	40
protein tyrosine kinase activity	58	positive regulation of epithelial cell proliferation	55	cytoplasm	0	Caveolin	28
protein heterodimerization activity	50	regulation of blood vessel endothelial cell migration	54	membrane fraction	0	Pfam-B_11773	25
transmembrane receptor protein tyrosine kinase activity	25	negative regulation of epidermal growth factor receptor signaling pathway	52			C2	25
cadherin binding	21	regulation of peptidyl-tyrosine phosphorylation	52			Pfam-B_13673	25
phosphoinositide phospholipase C activity	20	leukocyte migration	50			PI-PLC-X	24
GTP binding	14	regulation of epidermal growth factor receptor activity	46			PI-PLC-Y	24
GTPase inhibitor activity	14	regulation of nitric-oxide synthase activity	45			SH3_2	16
protein tyrosine phosphatase activity	10	cell adhesion	44			RhoGEF	16
receptor signaling protein activity	10	positive regulation of phosphorylation	44			GTPase_binding	16
ubiquitin-protein ligase activity	5	regulation of transcription from RNA polymerase II promoter	43			Pfam-B_88618	16
signal transducer activity	4	cellular component movement	43			Pfam-B_7012	12
structural molecule activity	3	cytokine-mediated signaling pathway	43			zf-C3HC4	12
peptidase activator activity	3	interleukin-6-mediated signaling pathway	43			Pfam-B_31050	9
nitric-oxide synthase binding	3	protein insertion into membrane	43			Pfam-B_10374	9
cholesterol binding	3	regulation of transcription	43			SH2	7
protein complex scaffold	3	sexual reproduction	43			Pfam-B_6279	5
receptor binding	3	eating behavior	43			Serine_rich	5
kinase activity	2	cellular response to hormone stimulus	43			Y_phosphatase	4
protein serine/threonine kinase activity	2	nervous system development	43			Pfam-B_3541	4
protein kinase activity	2	temperature homeostasis	43			PH	4
beta-catenin binding	1	response to estradiol stimulus	43
insulin receptor substrate binding	1	JAK-STAT cascade involved in growth hormone signaling pathway	43
insulin binding	1	JAK-STAT cascade	43
ErbB-3 class receptor binding	1	eye photoreceptor cell differentiation	42
SH3 domain binding	0	glucose homeostasis	42
protein binding	0	positive regulation of nitric oxide biosynthetic process	38
SH2 domain binding	0	intracellular signaling pathway	36
		fibroblast growth factor receptor signaling pathway	34
		axon guidance	34
		positive regulation of cell proliferation	32
		response to stress	31
		positive regulation of cell migration	21
		cell proliferation	20
		integrin-mediated signaling pathway	17
		positive regulation of blood vessel endothelial cell migration	15
		nerve growth factor receptor signaling pathway	13
		epidermal growth factor receptor signaling pathway	11
		organ morphogenesis	10
		cell-cell junction organization	9
		negative regulation of transcription from RNA polymerase II promoter	9
		adherens junction organization	9
		positive regulation of angiogenesis	8
		regulation of transcription factor activity	8
		phosphoinositide-mediated signaling	7
		regulation of angiogenesis	7
		platelet activation	5
		cell junction assembly	4
		signal transduction	4
		transcription	3
		actin filament organization	3
		small GTPase mediated signal transduction	2
		regulation of cell growth	2
		---	2
		antigen receptor-mediated signaling pathway	2
		regulation of apoptosis	2
		G-protein coupled receptor protein signaling pathway	2
		cell migration	2
		cell division	2
		B cell receptor signaling pathway	1
		positive regulation of peptidyl-tyrosine phosphorylation	1
		phosphoinositide 3-kinase cascade	1
		platelet-derived growth factor receptor signaling pathway	1
		positive regulation of glucose import	1
		innate immune response	0
		vesicle organization	0

## Sheet: siteLevel
pfam_site		motifs		pelm_kinase		scansite_kinase		scansite_bind
Label	NumberEnriched	Label	NumberEnriched	Label	NumberEnriched	Label	NumberEnriched	Label	NumberEnriched
Pkinase_Tyr	33	.......y.DP....	136	FLT4	68	INSR_Y_kin	45	ABL1_SH2	145
Pkinase	17	..O....yE......	121	Src	50	LCK_Y_kin	27	FGR_SH2	136
Pfam-B_1584	10	...D...y.....A.	119	EGFR	45	ABL1_Y_kin	21	ITK_SH2	119
~~~	9	.......y.DP...V	118	ZAP70	26	EGFR_Y_kin	5	NCK1_SH2	116
Caveolin	6	......Ty.......	110	Syk	18	ITK_Y_kin	3	SRC_SH2	92
Pfam-B_6279	3	.......y.D.....	110	Fyn	11	PDGFRB_Y_kin	2	FYN_SH2	82
Pfam-B_7012	2	.......y.D....O	106	MAP2K1	2	---	1	LCK_SH2	56
		......Ty.DP....	98	InsR	1	SRC_Y_kin	1	PIK3R1_SH2	33
		......Ty......O	97	---	0			SHC1_PTB	32
		.YODP.TyEDPN.AV	96	FGFR1	0			CRK_SH2	5
		.......y..P....	88					INPP5D_SH2	2
		O......y.DP....	84					GRB2_SH2	1
		.YO-..Ty.......	81					SHC1_SH2	1
		.......y-.P....	76					---	0
		.......y.D.N..O	75
		......TyE.....O	71
		..O...Ty.......	68
		OY.....y.DP....	67
		O......y..P....	64
		..O....y-......	64
		...-...y.....A.	63
		...-P..y.....A.	62
		..O...Ty-.P....	58
		......Ty-......	56
		.Y.....y.......	55
		.......y-......	52
		......Ty..P....	51
		OYIDPFTyEDPNEAV	51
		.Y.....y.DP....	49
		O.....TyE.....O	47
		.......y...D.-.	46
		....AAPyLKTKFIC	46
		.......y......O	45
		...-...y..PN...	43
		...-...y..P....	38
		.......y.DP..Y.	36
		..-.-..y.......	36
		K..S...y.L.....	35
		..I...Ty.......	35
		..I....y.......	34
		.......yE......	32
		..N..S.y.V.....	29
		....E..y.......	26
		O..-...y..P....	26
		O..-...y..PN...	25
		....-..y.D.....	23
		..F..P.y..O..O.	22
		.......y......G	22
		+.....Yy.......	21
		+......y.......	20
		.G....Oy.......	18
		.......y.-.....	18
		..V.S..yY..P...	17
		...I-..y.......	17
		E.P....y.......	17
		.......y..O.-..	16
		.......y.LO.-..	16
		..-.-..y......I	16
		.......y.L.....	16
		.......yY..P...	15
		...G-..y.......	15
		....S..y.......	15
		.......y..D....	14
		P......y..O....	14
		...G...y.......	14
		..V....yE......	14
		..F....y.....O.	13
		.......y.....O.	13
		....D..y.-.....	13
		.....K.yODP.TYE	12
		....D..y......+	12
		.......y..O....	12
		.......yY..PL..	12
		....G..y.......	11
		......OyS......	11
		....D..yS...KL.	11
		.......yQ......	11
		..E.E.VyS......	11
		O...G.Oy....+..	11
		.-...H.y.......	11
		....E..y......+	10
		.....P-y.......	10
		.......y.....Y.	10
		....D..yY.D...K	9
		......-y......+	9
		..G....yT.F...R	8
		E....-.y.......	8
		E......y...NP..	8
		......Oy.O.....	8
		......Oy..P....	8
		..F.D..y.....L.	8
		.D.-...y.......	8
		.....S.yA......	7
		...-...y..O....	7
		I......yQ......	7
		..-.D..y.......	7
		.....S.y..-..M.	7
		....A..y.......	6
		...E...y.+.S..+	6
		..L..P-y.....PK	6
		.......y....P..	6

## Sheet: dynamicLevel
maxValue		minValue		maxPosChange		maxNegChange
Label	NumberEnriched	Label	NumberEnriched	Label	NumberEnriched	Label	NumberEnriched
time(min)_5	456	time(min)_5	72	time(min)_5_time(min)_10	370	time(min)_5_time(min)_10	240
time(min)_10	335	time(min)_30	16	time(min)_0_time(min)_5	219	time(min)_0_time(min)_5	82
time(min)_30	188	time(min)_0	0	time(min)_10_time(min)_30	98	time(min)_10_time(min)_30	62
						~~~	48

## Sheet: C
endosome
EGFR	Y998		22
EGFR	Y1092		22
EGFR	S1166	Y1172	22
PIK3R1	Y607		20
EGFR	Y1069	Y1092	20
TOM1L2	Y192	Y200	20
PLCG1	Y783	Y775	20
EGFR	Y1172		19
PLCG1	Y775		19
EFNB1	Y343		17
ERBB2	Y1248		16
PHLPP1	Y1712		16
PKP3	Y195		16
CTNND1	Y334	Y321	16
TNS3	S776	Y780	16
MARVELD2	Y23		15
CTNND1	Y334		15
MAPK3	Y204		11
INPPL1	Y986	S1003	9
ARHGEF5	Y1097	Y1100	9
ARHGEF5	Y1097		8
RIN1	Y36		6
ATA2	Y20		6
CBL	Y552		5
AHCYL1	Y28		3
TNS3	S332	Y354	2
TNK2	Y859		1
TNK2	Y859	Y860	1
* endosome, EGFR sites (not all)
* is there enrichment for multiply phosphorylated groups here?
10 doubly phosphorylated out of 16	pval statistic for 10, 16 given 28 out of 77	0.017
1.22078
17
lamellipodium
CTTN	Y446		26
TNS3	S332	Y354	3
ENO1	Y44		26
DKFZp761P0423	Y411		2
PXN	Y118		26
AHCYL1	Y28		3
PLEKHA5	Y128	Y134	1

## Sheet: PFAM
UIM
STAM2	Y374			205
STAM	Y381			205
ANXA2	Y30			101
ACP1	Y132			44
RBCK1	Y330			41
TNK2	Y859	Y860		18
CCDC50	Y145			12
EPS15	Y849			11
FAM59A	Y453			3
TFRC	Y20			3
CAV1	Y14	Y6	Y25	3
PTPN18	Y389			2
SHC1	Y349	Y350		2
EPHA1	Y781			1
EGFR	Y1069	Y1092		1
EPHA2	Y588	Y594		1
PLCG1	Y783	Y775		1
SH3_1
BCAR1	Y327	1
STAM2	Y374	98
STAM	Y381	98
TOM1L2	Y192	Y200	1
EGFR	Y1172	1
ANXA2	Y30	5
CCDC50	Y145	4
TNK2	Y859	Y860	12
PLCG1	Y775	1
EGFR	Y1092	1
RBCK1	Y330	3
EPS15	Y849	4
FRK	Y497	1
BCAR1	Y249	1
PTPN18	Y389	1

## Sheet: scansite_bind
SHC1_PTB
EGFR	Y1172			32
INPPL1	Y986	S1003		31
EGFR	Y1092			30
SHC1	Y427			28
ARHGEF5	Y1097	Y1100		27
PLCG1	Y775			23
TOM1L2	Y192	Y200		19
MARVELD2	Y23			16
CBL	Y552			16
PTPN18	Y389			16
EGFR	S1166	Y1172		15
TNS3	S776	Y780		15
PIK3R1	Y607			15
EGFR	Y1069	Y1092		15
EPS15	Y849			15
MAPK3	Y204			15
SHC1	Y349			13
ERBB2	Y1248			12
CTNND1	Y334	Y321		12
EGFR	Y998			11
EFNB1	Y343			11
PHLPP1	Y1712			11
ARHGEF5	Y1097			11
PKP3	Y195			11
PLCG1	Y783	Y775		10
RBCK1	Y330			10
CTNND1	Y334			10
TNK2	Y859			9
TNS3	S332	Y354		7
CCDC50	Y145			7
TNK2	Y859	Y860		6
AHCYL1	Y28			6
MAPK1	Y187			6
STAT3	Y705			5
PKP3	Y84			5
STAT3	Y704			5
SHC1	Y349	Y350		2
CTTN	Y446			1
STAM2	Y374			1
RIN1	Y36			1
CAV1	Y14	Y6	Y25	1
ATA2	Y20			1

## Sheet: maxNegChange
0 and 5 min	max is 82		~~~	max is 48
BCAR1 Y327	82		PTK2 Y576	48
EPHB1 Y594 Y600	78		FRK Y497	48
EPHA2 Y588 Y594	53		EPHA2 Y772	34
DKFZp761P0423 Y411	34		BCAR1 Y249	34
ITGB4 Y1207	22		EPHA2 Y594	25
PTPN11 Y62	22		ACP1 Y132	20
EPHA2 Y772	15		EPHA2 Y588 Y594	18
PTK2 Y576	15		EPHB4 Y590 Y596	11
PLEKHA5 Y128 Y134	14		EPHB4 Y596	10
EPHB4 Y590 Y596	12		EFNB2 Y304	9
EFNB2 Y304	12		GIT1 Y545	9
EPHA2 Y594	11		TFRC Y20	8
BCAR1 Y249	11		EPHB1 Y600	8
ACP1 Y132	10		PLEKHA6 Y492	8
FRK Y497	10		BCAR1 Y327	7
EPHA1 Y781	9		EPHA1 Y781	7
GSK3B Y216	7		EPHB1 Y594 Y600	4
PRPF4B Y849	6		DKFZp761P0423 Y411	3
TFRC Y20	5		ANXA2 Y30	2
GPRC5A Y317	4		ITGB4 Y1207	2
EPHB1 Y600	4		SKT Y393	2
CDC2 Y15	4		PTPN11 Y62	2
PLEKHA6 Y492	4		CAV1 Y14	1
INSR Y1189	3
ANXA2 Y30	3
EPHB4 Y596	3
GIT1 Y545	3
TNK2 Y859	2
AFAP1L2 Y413	2
CAV1 Y14 Y6 Y25	2
SHC1 Y349	2
CAV1 Y14	2
INPPL1 Y986 S1003	2
SHC1 Y427	2
CBL Y552	2
PTPRA Y798	2
PTPN18 Y389	2
TOM1L2 Y192 Y200	1
EGFR Y1172	1
CCDC50 Y145	1
PIK3R1 Y607	1
TNK2 Y859 Y860	1
STAT3 Y705	1
PKP3 Y84	1
STAT3 Y704	1

## Sheet: P
positive regulation of DNA replication	max 60
SHC1 Y349	60
SHC1 Y427	60
SHC1 Y349 Y350	59
MAPK1 Y187	59
CAV1 Y14 Y6 Y25	57	*not labeled
FAM59A Y453	50
PTPN18 Y389	49	*
ARHGEF5 Y1097	24
ARHGEF5 Y1097 Y1100	17
INSR Y1189	16
CAV1 Y14	16
MAPK3 Y204	15
SKT Y393	14
RIN1 Y36	9
EPS15 Y849	8
ATA2 Y20	7
CCDC50 Y145	6
TNK2 Y859 Y860	5
CDC2 Y15	5
CBL Y552	4
INPPL1 Y986 S1003	3
TNK2 Y859	2
EGFR Y1172	2
MARVELD2 Y23	1
EPHA2 Y772	1
PIK3R1 Y607	1
EPHA2 Y594	1
FRK Y497	1

## Sheet: motifs
.......y.DP....	136
EPHB4 Y590 Y596	136
EPHB4 Y596	128
PLEKHA6 Y492	126
GIT1 Y545	126
EFNB2 Y304	124
EPHB1 Y600	122
EPHA2 Y772	120
EPHA2 Y594	118
FRK Y497	114
BCAR1 Y249	113
SKT Y393	103
EPHA2 Y588 Y594	93
PTK2 Y576	83
EPHA1 Y781	76
INSR Y1189	76
CAV1 Y14	74
TFRC Y20	66
ITGB4 Y1207	59
PTPN11 Y62	59
EPHB1 Y594 Y600	58
BCAR1 Y327	57
GPRC5A Y317	57
DKFZp761P0423 Y411	52
CDC2 Y15	52
GSK3B Y216	51
PRPF4B Y849	50
ENO1 Y44	49
PXN Y118	48
AFAP1L2 Y413	46
PTPRA Y798	46
ATA2 Y20	32
CTTN Y446	29
PLEKHA5 Y128 Y134	13
ACP1 Y132	9
FAM59A Y453	9
RIN1 Y36	6
CAV1 Y14 Y6 Y25	6
ANXA2 Y30	5
STAM Y381	3
STAM2 Y374	2
MARVELD2 Y23	1
SHC1 Y349 Y350	1
STAT3 Y705	1
PKP3 Y84	1
STAT3 Y704	1
MAPK1 Y187	1
