# Supplementary material for: MCAM: Multiple Clustering Analysis Methodology for Deriving Hypotheses and Insights from High-Throughput Proteomic Datasets
Source: PLoS Comput Biol. 2011 Jul 21;7(7):e1002119. doi: 10.1371/journal.pcbi.1002119 (PMC3140961; doi:10.1371/journal.pcbi.1002119)
Supplement: Table S3 — Supplemental co-occurrence information. List of all possible pairwise relationships between phosphopeptides in the EGF4 and HER2 analyses and the number of times they co-occur in their respective . This also contains the listings for the three groups highlighted in Figure 4 C and D. (XLSX) [file pcbi.1002119.s008.xlsx]

## Sheet: EGF4 rankOrderedCoOccurrences
peptide 1	peptide 2	Co-occurrences out of 331 sets
STAT3 Y705	STAT3 Y704	329
ERBB2 Y1248	CTNND1 Y334 Y321	325
EFNB1 Y343	CTNND1 Y334	323
STAM2 Y374	STAM Y381	323
EPHB4 Y596	GIT1 Y545	323
PLCG1 Y783 Y775	EGFR Y1069 Y1092	321
EFNB1 Y343	PHLPP1 Y1712	319
EFNB1 Y343	CTNND1 Y334 Y321	319
STAT3 Y705	PKP3 Y84	319
CTNND1 Y334	CTNND1 Y334 Y321	318
PKP3 Y84	STAT3 Y704	317
ERBB2 Y1248	EFNB1 Y343	315
PHLPP1 Y1712	CTNND1 Y334	314
EPHB1 Y600	PLEKHA6 Y492	313
ERBB2 Y1248	CTNND1 Y334	312
PHLPP1 Y1712	PKP3 Y195	310
EGFR Y998	PKP3 Y195	309
PHLPP1 Y1712	CTNND1 Y334 Y321	309
ERBB2 Y1248	PHLPP1 Y1712	307
EGFR Y998	EFNB1 Y343	307
ENO1 Y44	PXN Y118	307
GSK3B Y216	PRPF4B Y849	305
EGFR Y998	PHLPP1 Y1712	304
EFNB1 Y343	PKP3 Y195	304
EGFR Y998	CTNND1 Y334	301
PLEKHA6 Y492	GIT1 Y545	300
PKP3 Y195	CTNND1 Y334	300
PKP3 Y195	CTNND1 Y334 Y321	300
EGFR Y998	CTNND1 Y334 Y321	299
ITGB4 Y1207	PTPN11 Y62	299
ERBB2 Y1248	PKP3 Y195	298
ERBB2 Y1248	EGFR Y998	297
EPHB4 Y596	PLEKHA6 Y492	297
TOM1L2 Y192 Y200	PLCG1 Y775	293
EGFR Y998	EGFR S1166 Y1172	292
EPHB4 Y590 Y596	EFNB2 Y304	292
ERBB2 Y1248	EGFR S1166 Y1172	291
EGFR S1166 Y1172	CTNND1 Y334 Y321	288
EPHA2 Y772	EPHA2 Y594	287
EPHB1 Y600	GIT1 Y545	286
EFNB1 Y343	EGFR S1166 Y1172	283
EPHA1 Y781	TFRC Y20	283
EPHB4 Y596	EPHB1 Y600	282
EGFR S1166 Y1172	PKP3 Y195	280
EGFR S1166 Y1172	CTNND1 Y334	278
ARHGEF5 Y1097	MAPK3 Y204	278
EPHB4 Y590 Y596	EPHA2 Y772	277
EGFR S1166 Y1172	PHLPP1 Y1712	277
SHC1 Y349 Y350	MAPK1 Y187	277
FAM59A Y453	CAV1 Y14 Y6 Y25	270
EPHB1 Y594 Y600	BCAR1 Y327	269
EPHB4 Y590 Y596	EPHA2 Y594	268
AFAP1L2 Y413	PTPRA Y798	268
EGFR S1166 Y1172	EGFR Y1092	264
EGFR Y998	EGFR Y1092	261
FAM59A Y453	SHC1 Y349 Y350	261
AFAP1L2 Y413	CDC2 Y15	260
CAV1 Y14 Y6 Y25	SHC1 Y349 Y350	259
INPPL1 Y986 S1003	CBL Y552	259
PLCG1 Y775	EGFR Y1092	258
EGFR Y1092	PKP3 Y195	256
EPHA2 Y594	FRK Y497	255
EPHA2 Y772	FRK Y497	254
ARHGEF5 Y1097 Y1100	MAPK3 Y204	254
TNK2 Y859 Y860	EPS15 Y849	253
GPRC5A Y317	GSK3B Y216	253
TNS3 S332 Y354	AHCYL1 Y28	252
SHC1 Y349	SHC1 Y427	250
MARVELD2 Y23	TNS3 S776 Y780	249
EPHA2 Y772	EFNB2 Y304	249
GPRC5A Y317	PRPF4B Y849	249
ERBB2 Y1248	EGFR Y1092	248
EFNB1 Y343	EGFR Y1092	248
INSR Y1189	CAV1 Y14	248
EGFR Y1092	CTNND1 Y334 Y321	248
PHLPP1 Y1712	EGFR Y1092	244
TOM1L2 Y192 Y200	EGFR Y1092	244
EGFR Y1092	CTNND1 Y334	244
EPHA2 Y594	EFNB2 Y304	243
BCAR1 Y249	GIT1 Y545	241
FRK Y497	BCAR1 Y249	240
EPHB4 Y596	BCAR1 Y249	239
EPHA2 Y594	PTK2 Y576	237
EPHB1 Y594 Y600	ITGB4 Y1207	236
EPHA2 Y772	PTK2 Y576	236
MAPK1 Y187	PTPN18 Y389	235
EGFR Y1172	PIK3R1 Y607	233
TNS3 S776 Y780	CBL Y552	233
GPRC5A Y317	CDC2 Y15	232
EGFR S1166 Y1172	PIK3R1 Y607	230
CCDC50 Y145	TNK2 Y859 Y860	230
SHC1 Y427	PTPN18 Y389	230
PLCG1 Y775	PKP3 Y195	229
PTK2 Y576	FRK Y497	229
EPHA1 Y781	PTK2 Y576	228
CAV1 Y14 Y6 Y25	MAPK1 Y187	228
GSK3B Y216	PTPN11 Y62	228
EPHB4 Y596	FRK Y497	227
FAM59A Y453	MAPK1 Y187	226
ARHGEF5 Y1097	MAPK1 Y187	226
CCDC50 Y145	EPS15 Y849	225
PLEKHA6 Y492	BCAR1 Y249	225
PRPF4B Y849	PTPN11 Y62	225
CAV1 Y14	SKT Y393	224
TNS3 S776 Y780	EGFR Y1092	223
CDC2 Y15	PTPRA Y798	223
PHLPP1 Y1712	PLCG1 Y775	222
EPHB1 Y600	BCAR1 Y249	222
FRK Y497	GIT1 Y545	222
CTTN Y446	PXN Y118	221
EGFR Y998	PLCG1 Y775	221
EPHB1 Y594 Y600	PTPN11 Y62	220
ITGB4 Y1207	GSK3B Y216	219
EPHA1 Y781	EPHA2 Y594	218
EPHB4 Y590 Y596	FRK Y497	218
ITGB4 Y1207	PRPF4B Y849	217
TNK2 Y859	PKP3 Y84	216
ERBB2 Y1248	PIK3R1 Y607	216
EPHB1 Y594 Y600	DKFZp761P0423 Y411	216
ARHGEF5 Y1097 Y1100	ARHGEF5 Y1097	216
CAV1 Y14	ATA2 Y20	216
CTTN Y446	ENO1 Y44	215
EGFR Y1172	MAPK3 Y204	215
EGFR Y1172	INPPL1 Y986 S1003	214
EFNB1 Y343	PLCG1 Y775	213
INSR Y1189	SKT Y393	213
RIN1 Y36	ATA2 Y20	213
PIK3R1 Y607	CTNND1 Y334 Y321	213
TNK2 Y859	STAT3 Y705	212
EGFR Y1172	ARHGEF5 Y1097 Y1100	212
ARHGEF5 Y1097 Y1100	SHC1 Y427	212
TNK2 Y859	STAT3 Y704	211
EPHB4 Y590 Y596	PLEKHA6 Y492	211
EGFR S1166 Y1172	TNS3 S776 Y780	211
TOM1L2 Y192 Y200	PKP3 Y195	211
PIK3R1 Y607	MAPK3 Y204	211
PLCG1 Y775	CTNND1 Y334	211
EGFR Y998	TOM1L2 Y192 Y200	210
SHC1 Y349 Y350	PTPN18 Y389	209
PRPF4B Y849	PTPRA Y798	209
GSK3B Y216	PTPRA Y798	208
EPHB4 Y590 Y596	EPHB4 Y596	207
EGFR Y1172	EGFR Y1092	207
PLCG1 Y775	CTNND1 Y334 Y321	207
BCAR1 Y327	PTPN11 Y62	206
ERBB2 Y1248	PLCG1 Y775	204
EGFR Y998	PIK3R1 Y607	204
EFNB1 Y343	PIK3R1 Y607	204
EPHA2 Y588 Y594	PTK2 Y576	204
PHLPP1 Y1712	TOM1L2 Y192 Y200	203
PIK3R1 Y607	CTNND1 Y334	203
STAM Y381	ANXA2 Y30	202
ARHGEF5 Y1097	PTPN18 Y389	202
EFNB2 Y304	PLEKHA6 Y492	202
EPHB4 Y590 Y596	GIT1 Y545	201
INSR Y1189	CDC2 Y15	201
EGFR S1166 Y1172	PLCG1 Y775	201
TFRC Y20	PTK2 Y576	201
CAV1 Y14 Y6 Y25	PTPN18 Y389	201
SHC1 Y427	MAPK1 Y187	201
SHC1 Y349	PTPN18 Y389	200
EFNB2 Y304	EPHB1 Y600	200
BCAR1 Y327	ITGB4 Y1207	199
PLEKHA6 Y492	FRK Y497	199
ARHGEF5 Y1097 Y1100	INPPL1 Y986 S1003	198
EGFR Y1069 Y1092	PLCG1 Y775	198
EGFR Y998	TNS3 S776 Y780	197
EFNB1 Y343	TOM1L2 Y192 Y200	197
EPHB4 Y590 Y596	PTK2 Y576	197
STAM2 Y374	ANXA2 Y30	197
PHLPP1 Y1712	PIK3R1 Y607	197
TOM1L2 Y192 Y200	EGFR Y1069 Y1092	196
EPHB4 Y590 Y596	EPHB1 Y600	195
EFNB2 Y304	FRK Y497	195
EPHB1 Y594 Y600	GSK3B Y216	193
TOM1L2 Y192 Y200	CTNND1 Y334	193
CAV1 Y14 Y6 Y25	SHC1 Y427	193
PTK2 Y576	BCAR1 Y249	192
ERBB2 Y1248	TNS3 S776 Y780	191
MARVELD2 Y23	CBL Y552	191
EGFR S1166 Y1172	TOM1L2 Y192 Y200	191
TNS3 S776 Y780	PKP3 Y195	191
PIK3R1 Y607	PKP3 Y195	191
EPHB1 Y600	FRK Y497	191
EPS15 Y849	PTPN18 Y389	191
PLCG1 Y783 Y775	PLCG1 Y775	190
EPHB1 Y594 Y600	PRPF4B Y849	190
BCAR1 Y327	DKFZp761P0423 Y411	190
PLCG1 Y783 Y775	TOM1L2 Y192 Y200	189
AFAP1L2 Y413	GPRC5A Y317	189
TOM1L2 Y192 Y200	CTNND1 Y334 Y321	189
TNS3 S332 Y354	CTNND1 Y334	189
EPHB4 Y596	EPHA2 Y594	189
TNS3 S776 Y780	CTNND1 Y334 Y321	189
DKFZp761P0423 Y411	GSK3B Y216	189
EFNB1 Y343	TNS3 S776 Y780	188
TNS3 S332 Y354	CTNND1 Y334 Y321	188
TNS3 S776 Y780	PLCG1 Y775	187
TNS3 S776 Y780	CTNND1 Y334	187
EFNB2 Y304	PTK2 Y576	187
ERBB2 Y1248	TOM1L2 Y192 Y200	186
EPHA2 Y772	PLEKHA6 Y492	186
SHC1 Y349 Y350	SHC1 Y427	186
SHC1 Y349 Y350	ARHGEF5 Y1097	186
EPHB4 Y590 Y596	BCAR1 Y249	185
PHLPP1 Y1712	TNS3 S332 Y354	185
BCAR1 Y249	SKT Y393	185
ERBB2 Y1248	TNS3 S332 Y354	184
EFNB1 Y343	TNS3 S332 Y354	184
EPHA1 Y781	EPHB4 Y590 Y596	184
PHLPP1 Y1712	TNS3 S776 Y780	184
PIK3R1 Y607	ARHGEF5 Y1097	184
EPHA2 Y594	GIT1 Y545	184
SKT Y393	GIT1 Y545	184
CTTN Y446	PLEKHA5 Y128 Y134	183
MARVELD2 Y23	EGFR Y1092	183
RIN1 Y36	ARHGEF5 Y1097	183
DKFZp761P0423 Y411	PRPF4B Y849	183
EPHA1 Y781	EPHA2 Y772	182
EPHA1 Y781	EFNB2 Y304	182
MAPK1 Y187	MAPK3 Y204	182
MAPK3 Y204	PTPN18 Y389	181
MARVELD2 Y23	ARHGEF5 Y1097 Y1100	180
TFRC Y20	EPHA2 Y594	180
EGFR Y1172	CBL Y552	180
EPHB4 Y596	EFNB2 Y304	180
EPHB4 Y596	SKT Y393	180
PIK3R1 Y607	EGFR Y1092	180
CAV1 Y14 Y6 Y25	SHC1 Y349	180
DKFZp761P0423 Y411	ITGB4 Y1207	180
SHC1 Y427	ARHGEF5 Y1097	180
EPHA2 Y772	BCAR1 Y249	179
EGFR Y1172	PLCG1 Y775	179
EPHA2 Y594	BCAR1 Y249	179
SHC1 Y349	MAPK1 Y187	179
EFNB2 Y304	GIT1 Y545	179
GPRC5A Y317	PTPRA Y798	178
EPHA2 Y772	EPHB4 Y596	176
EPHA2 Y772	EPHB1 Y600	176
TNS3 S332 Y354	PKP3 Y195	176
MARVELD2 Y23	EGFR S1166 Y1172	175
TOM1L2 Y192 Y200	TNS3 S776 Y780	175
CDC2 Y15	GSK3B Y216	175
ACP1 Y132	ANXA2 Y30	174
EPHA2 Y594	EPHA2 Y588 Y594	174
MARVELD2 Y23	EGFR Y1172	173
ARHGEF5 Y1097 Y1100	PIK3R1 Y607	173
SHC1 Y349	CBL Y552	173
TOM1L2 Y192 Y200	EGFR Y1172	172
EPHA2 Y772	GIT1 Y545	172
RIN1 Y36	MAPK3 Y204	172
EFNB2 Y304	BCAR1 Y249	172
EPHA2 Y772	EPHA2 Y588 Y594	171
FAM59A Y453	RIN1 Y36	170
EGFR Y1172	ARHGEF5 Y1097	170
EFNB2 Y304	PTPN11 Y62	170
GPRC5A Y317	PTPN11 Y62	170
EGFR Y998	TNS3 S332 Y354	169
CTTN Y446	ATA2 Y20	168
INSR Y1189	AFAP1L2 Y413	168
TNS3 S776 Y780	INPPL1 Y986 S1003	168
GPRC5A Y317	ITGB4 Y1207	168
CDC2 Y15	PRPF4B Y849	168
AFAP1L2 Y413	GSK3B Y216	167
RIN1 Y36	CAV1 Y14 Y6 Y25	167
BCAR1 Y327	GSK3B Y216	166
BCAR1 Y327	PRPF4B Y849	166
EGFR S1166 Y1172	EGFR Y1172	166
DKFZp761P0423 Y411	PTPN11 Y62	166
SHC1 Y349	SHC1 Y349 Y350	166
SHC1 Y349	ARHGEF5 Y1097	166
PLEKHA6 Y492	SKT Y393	166
TNK2 Y859	INPPL1 Y986 S1003	165
INSR Y1189	ATA2 Y20	165
AFAP1L2 Y413	PRPF4B Y849	165
ARHGEF5 Y1097 Y1100	SHC1 Y349	165
DKFZp761P0423 Y411	PTPRA Y798	165
EFNB2 Y304	ITGB4 Y1207	165
MARVELD2 Y23	PIK3R1 Y607	164
TFRC Y20	EFNB2 Y304	164
EPHA2 Y588 Y594	FRK Y497	164
EPHA1 Y781	EPHA2 Y588 Y594	163
EPHB4 Y590 Y596	TFRC Y20	163
EPHB1 Y600	SKT Y393	163
EGFR Y1172	TNS3 S776 Y780	162
CAV1 Y14 Y6 Y25	ARHGEF5 Y1097	162
TNK2 Y859 Y860	PTPN18 Y389	162
TNK2 Y859	CBL Y552	161
MARVELD2 Y23	INPPL1 Y986 S1003	161
DKFZp761P0423 Y411	GPRC5A Y317	161
EPHA2 Y594	PLEKHA6 Y492	160
ERBB2 Y1248	MARVELD2 Y23	159
MARVELD2 Y23	MAPK3 Y204	159
EGFR S1166 Y1172	TNS3 S332 Y354	159
EGFR Y998	MARVELD2 Y23	158
TFRC Y20	EPHA2 Y772	157
PTPN11 Y62	PTPRA Y798	157
MARVELD2 Y23	CTNND1 Y334 Y321	156
FAM59A Y453	PTPN18 Y389	156
PIK3R1 Y607	INPPL1 Y986 S1003	156
SHC1 Y427	MAPK3 Y204	156
FAM59A Y453	SHC1 Y427	155
CCDC50 Y145	RBCK1 Y330	155
TNS3 S776 Y780	PIK3R1 Y607	155
AHCYL1 Y28	PLEKHA5 Y128 Y134	155
EPHA1 Y781	FRK Y497	154
MARVELD2 Y23	PLCG1 Y775	154
MARVELD2 Y23	PKP3 Y195	154
EPHB4 Y590 Y596	PTPN11 Y62	153
EGFR Y1092	INPPL1 Y986 S1003	153
TNK2 Y859	PIK3R1 Y607	152
MARVELD2 Y23	CTNND1 Y334	152
ENO1 Y44	CDC2 Y15	152
EFNB1 Y343	MARVELD2 Y23	151
RIN1 Y36	ARHGEF5 Y1097 Y1100	151
EPHA2 Y594	EPHB1 Y600	151
GPRC5A Y317	EPHB1 Y600	151
ITGB4 Y1207	PTPRA Y798	151
TNK2 Y859	EGFR Y998	150
EPHB4 Y590 Y596	ITGB4 Y1207	150
INPPL1 Y986 S1003	SHC1 Y427	150
EGFR S1166 Y1172	MAPK3 Y204	149
TNK2 Y859	EFNB1 Y343	148
CTTN Y446	TNS3 S332 Y354	148
MARVELD2 Y23	PHLPP1 Y1712	148
EPHB4 Y590 Y596	EPHA2 Y588 Y594	148
AFAP1L2 Y413	ENO1 Y44	148
PIK3R1 Y607	CBL Y552	148
PLCG1 Y783 Y775	TNS3 S776 Y780	147
FAM59A Y453	SHC1 Y349	147
PHLPP1 Y1712	AHCYL1 Y28	147
CCDC50 Y145	SHC1 Y349	147
PLCG1 Y775	INPPL1 Y986 S1003	147
TNK2 Y859	CTNND1 Y334	146
EPHB1 Y594 Y600	GPRC5A Y317	146
TNK2 Y859	PHLPP1 Y1712	145
ERBB2 Y1248	EGFR Y1172	145
ERBB2 Y1248	AHCYL1 Y28	145
EGFR Y998	EGFR Y1172	145
SHC1 Y349 Y350	MAPK3 Y204	145
AHCYL1 Y28	CTNND1 Y334 Y321	145
INSR Y1189	PTPRA Y798	144
EFNB1 Y343	AHCYL1 Y28	143
EGFR Y1172	CTNND1 Y334 Y321	143
EPHB4 Y596	PTK2 Y576	143
CTNND1 Y334	STAT3 Y704	143
BCAR1 Y327	GPRC5A Y317	142
ARHGEF5 Y1097 Y1100	CBL Y552	142
EGFR Y1069 Y1092	EGFR Y1092	142
AHCYL1 Y28	CTNND1 Y334	142
SKT Y393	ATA2 Y20	142
TNK2 Y859	ERBB2 Y1248	141
TNK2 Y859	CTNND1 Y334 Y321	141
EFNB1 Y343	STAT3 Y704	141
MARVELD2 Y23	TOM1L2 Y192 Y200	141
PHLPP1 Y1712	EGFR Y1069 Y1092	141
PHLPP1 Y1712	STAT3 Y704	141
ARHGEF5 Y1097 Y1100	TNS3 S776 Y780	141
SHC1 Y349	MAPK3 Y204	141
EGFR Y1069 Y1092	PKP3 Y195	141
STAT3 Y705	CTNND1 Y334	141
TNK2 Y859	EGFR S1166 Y1172	140
TNK2 Y859	PKP3 Y195	140
PLCG1 Y783 Y775	PHLPP1 Y1712	140
PLCG1 Y783 Y775	PKP3 Y195	140
INSR Y1189	PXN Y118	140
AFAP1L2 Y413	DKFZp761P0423 Y411	140
TNS3 S332 Y354	PLEKHA5 Y128 Y134	140
CAV1 Y14	CDC2 Y15	140
EFNB1 Y343	STAT3 Y705	139
BCAR1 Y327	EPHA2 Y588 Y594	139
FAM59A Y453	ARHGEF5 Y1097	139
PHLPP1 Y1712	STAT3 Y705	139
TNS3 S776 Y780	EGFR Y1069 Y1092	139
RBCK1 Y330	EPS15 Y849	139
PTK2 Y576	GIT1 Y545	139
EFNB1 Y343	EGFR Y1172	138
EGFR Y1172	PKP3 Y195	138
AHCYL1 Y28	PKP3 Y195	138
PLCG1 Y783 Y775	EGFR Y1092	137
EGFR Y998	EGFR Y1069 Y1092	137
EGFR Y998	STAT3 Y704	137
EPHB1 Y594 Y600	PTPRA Y798	137
RIN1 Y36	PIK3R1 Y607	137
GPRC5A Y317	PLEKHA6 Y492	137
PLCG1 Y783 Y775	EGFR Y998	136
AFAP1L2 Y413	PXN Y118	136
EGFR Y1172	CTNND1 Y334	136
EGFR Y1092	MAPK3 Y204	136
EGFR Y998	AHCYL1 Y28	135
EGFR Y998	STAT3 Y705	135
EFNB1 Y343	EGFR Y1069 Y1092	135
TOM1L2 Y192 Y200	PIK3R1 Y607	135
TOM1L2 Y192 Y200	INPPL1 Y986 S1003	135
RIN1 Y36	SHC1 Y349 Y350	135
TNS3 S776 Y780	SHC1 Y349	135
PXN Y118	CDC2 Y15	135
EPS15 Y849	MAPK1 Y187	135
PKP3 Y84	CTNND1 Y334	135
PLCG1 Y783 Y775	EFNB1 Y343	134
PLCG1 Y783 Y775	MARVELD2 Y23	134
PHLPP1 Y1712	EGFR Y1172	134
PHLPP1 Y1712	PKP3 Y84	134
EPHA2 Y594	PTPN11 Y62	134
EGFR Y1069 Y1092	CTNND1 Y334	134
EPHA2 Y588 Y594	EFNB2 Y304	134
PKP3 Y195	STAT3 Y704	134
STAT3 Y704	CTNND1 Y334 Y321	134
PLCG1 Y783 Y775	CTNND1 Y334	133
EFNB1 Y343	PKP3 Y84	133
EPHA1 Y781	PTPN11 Y62	133
CCDC50 Y145	PTPN18 Y389	133
PIK3R1 Y607	PLCG1 Y775	133
EGFR Y1069 Y1092	CTNND1 Y334 Y321	133
INPPL1 Y986 S1003	MAPK3 Y204	133
PLCG1 Y783 Y775	CTNND1 Y334 Y321	132
EGFR S1166 Y1172	INPPL1 Y986 S1003	132
EPHA2 Y772	PTPN11 Y62	132
DKFZp761P0423 Y411	CDC2 Y15	132
EGFR Y1092	CBL Y552	132
STAT3 Y705	PKP3 Y195	132
STAT3 Y705	CTNND1 Y334 Y321	132
CTTN Y446	AHCYL1 Y28	131
FAM59A Y453	CAV1 Y14	131
TFRC Y20	EPHA2 Y588 Y594	131
RIN1 Y36	CAV1 Y14	131
EPHA2 Y594	ITGB4 Y1207	131
FRK Y497	SKT Y393	131
ERBB2 Y1248	EGFR Y1069 Y1092	130
ERBB2 Y1248	STAT3 Y704	130
EGFR Y998	PKP3 Y84	130
EPHA1 Y781	ITGB4 Y1207	130
EGFR Y1172	SHC1 Y427	130
TNS3 S332 Y354	EGFR Y1092	130
EFNB2 Y304	GPRC5A Y317	130
ERBB2 Y1248	PLCG1 Y783 Y775	129
EPHA2 Y772	ITGB4 Y1207	129
ERBB2 Y1248	STAT3 Y705	128
EPHB1 Y594 Y600	EPHA2 Y588 Y594	128
BCAR1 Y327	EFNB2 Y304	128
EPHB4 Y590 Y596	SKT Y393	128
EPHB4 Y596	EPHA2 Y588 Y594	128
CAV1 Y14	BCAR1 Y249	128
SHC1 Y427	EPS15 Y849	128
CDC2 Y15	SKT Y393	128
PKP3 Y84	PKP3 Y195	128
ERBB2 Y1248	MAPK3 Y204	127
FAM59A Y453	ATA2 Y20	127
INSR Y1189	ENO1 Y44	127
INSR Y1189	GPRC5A Y317	127
AFAP1L2 Y413	ITGB4 Y1207	127
EGFR S1166 Y1172	EGFR Y1069 Y1092	127
EGFR S1166 Y1172	AHCYL1 Y28	127
TFRC Y20	FRK Y497	127
ARHGEF5 Y1097 Y1100	PTPN18 Y389	127
TNK2 Y859 Y860	RBCK1 Y330	127
PXN Y118	PLEKHA5 Y128 Y134	127
PTK2 Y576	PLEKHA6 Y492	127
PLCG1 Y783 Y775	EGFR S1166 Y1172	126
MARVELD2 Y23	EGFR Y1069 Y1092	126
AFAP1L2 Y413	PTPN11 Y62	126
EPHA2 Y588 Y594	BCAR1 Y249	126
PKP3 Y84	CTNND1 Y334 Y321	126
TNK2 Y859	EGFR Y1172	125
TNS3 S332 Y354	PIK3R1 Y607	125
EPHB1 Y600	PTK2 Y576	125
EGFR Y998	MAPK3 Y204	124
EPHA2 Y588 Y594	GIT1 Y545	124
ARHGEF5 Y1097	EPS15 Y849	124
CDC2 Y15	PTPN11 Y62	124
MAPK3 Y204	CTNND1 Y334 Y321	124
PLCG1 Y783 Y775	AHCYL1 Y28	123
EPHA1 Y781	BCAR1 Y249	123
MARVELD2 Y23	ARHGEF5 Y1097	123
INSR Y1189	GIT1 Y545	123
STAM2 Y374	RBCK1 Y330	123
EGFR S1166 Y1172	CBL Y552	123
STAM Y381	RBCK1 Y330	123
ARHGEF5 Y1097 Y1100	EGFR Y1092	123
CAV1 Y14 Y6 Y25	MAPK3 Y204	123
ENO1 Y44	PTPRA Y798	123
EGFR Y1069 Y1092	AHCYL1 Y28	123
EPS15 Y849	MAPK3 Y204	123
CTTN Y446	CAV1 Y14	122
ERBB2 Y1248	PKP3 Y84	122
EGFR Y998	INPPL1 Y986 S1003	122
MARVELD2 Y23	SHC1 Y349	122
RIN1 Y36	MAPK1 Y187	122
PLEKHA5 Y128 Y134	ATA2 Y20	122
INSR Y1189	EPHB4 Y596	121
TFRC Y20	PTPN11 Y62	121
ARHGEF5 Y1097 Y1100	MAPK1 Y187	121
ENO1 Y44	DKFZp761P0423 Y411	121
EPHB1 Y594 Y600	EFNB2 Y304	120
TOM1L2 Y192 Y200	STAT3 Y704	120
CAV1 Y14 Y6 Y25	CAV1 Y14	120
ENO1 Y44	PLEKHA5 Y128 Y134	120
EFNB2 Y304	SKT Y393	120
CDC2 Y15	ITGB4 Y1207	120
TFRC Y20	ITGB4 Y1207	119
EGFR Y1172	PTPN18 Y389	119
DKFZp761P0423 Y411	PXN Y118	119
EPHA2 Y594	SKT Y393	119
PTK2 Y576	PTPN11 Y62	119
CBL Y552	MAPK3 Y204	119
TNK2 Y859	EGFR Y1092	118
CTTN Y446	RIN1 Y36	118
EFNB1 Y343	MAPK3 Y204	118
MARVELD2 Y23	RIN1 Y36	118
INSR Y1189	BCAR1 Y249	118
TOM1L2 Y192 Y200	STAT3 Y705	118
PKP3 Y195	MAPK3 Y204	118
EPHB1 Y594 Y600	AFAP1L2 Y413	117
EPHA1 Y781	EPHB4 Y596	117
EGFR S1166 Y1172	STAT3 Y704	117
TNS3 S776 Y780	MAPK3 Y204	117
SHC1 Y349	INPPL1 Y986 S1003	117
PXN Y118	PTPRA Y798	117
CTNND1 Y334	MAPK3 Y204	117
ERBB2 Y1248	INPPL1 Y986 S1003	116
BCAR1 Y327	PTPRA Y798	116
EGFR S1166 Y1172	ARHGEF5 Y1097	116
TNS3 S332 Y354	PLCG1 Y775	116
GPRC5A Y317	GIT1 Y545	116
PTK2 Y576	ITGB4 Y1207	116
EPHA1 Y781	GIT1 Y545	115
EGFR S1166 Y1172	STAT3 Y705	115
TOM1L2 Y192 Y200	PKP3 Y84	115
ANXA2 Y30	RBCK1 Y330	115
SHC1 Y349 Y350	EPS15 Y849	115
EFNB1 Y343	INPPL1 Y986 S1003	114
FAM59A Y453	SKT Y393	114
AFAP1L2 Y413	CAV1 Y14	114
ARHGEF5 Y1097 Y1100	PLCG1 Y775	114
INPPL1 Y986 S1003	CTNND1 Y334 Y321	114
EGFR Y998	CBL Y552	113
PHLPP1 Y1712	INPPL1 Y986 S1003	113
PHLPP1 Y1712	MAPK3 Y204	113
EPHB4 Y596	GPRC5A Y317	113
PLCG1 Y775	CBL Y552	113
INPPL1 Y986 S1003	PKP3 Y195	113
INPPL1 Y986 S1003	CTNND1 Y334	113
FRK Y497	PTPN11 Y62	113
EPHB1 Y594 Y600	EPHB4 Y590 Y596	112
EPHB1 Y594 Y600	CDC2 Y15	112
BCAR1 Y327	EPHA2 Y772	112
BCAR1 Y327	CDC2 Y15	112
EGFR Y1092	STAT3 Y704	112
EPHB1 Y600	CDC2 Y15	112
BCAR1 Y327	EPHB4 Y590 Y596	111
EGFR S1166 Y1172	PKP3 Y84	111
CCDC50 Y145	SHC1 Y427	111
CAV1 Y14 Y6 Y25	ATA2 Y20	111
FRK Y497	ITGB4 Y1207	111
ERBB2 Y1248	RIN1 Y36	110
AFAP1L2 Y413	SKT Y393	110
CAV1 Y14	GIT1 Y545	110
EPHA2 Y588 Y594	PLEKHA6 Y492	110
EGFR Y1092	STAT3 Y705	110
ARHGEF5 Y1097	ATA2 Y20	110
CDC2 Y15	ATA2 Y20	110
TNK2 Y859	TNK2 Y859 Y860	109
EGFR S1166 Y1172	ARHGEF5 Y1097 Y1100	109
RIN1 Y36	SHC1 Y427	109
PIK3R1 Y607	MAPK1 Y187	109
PXN Y118	ATA2 Y20	109
ATA2 Y20	MAPK3 Y204	109
ERBB2 Y1248	CBL Y552	108
TOM1L2 Y192 Y200	ARHGEF5 Y1097 Y1100	108
TOM1L2 Y192 Y200	MAPK3 Y204	108
RIN1 Y36	CTNND1 Y334 Y321	108
CCDC50 Y145	CBL Y552	108
EPHB4 Y596	CAV1 Y14	108
CAV1 Y14 Y6 Y25	EPS15 Y849	108
EPHB1 Y600	PTPN11 Y62	108
TNK2 Y859	MAPK3 Y204	107
BCAR1 Y327	AFAP1L2 Y413	107
INSR Y1189	EPHB1 Y600	107
PIK3R1 Y607	PTPN18 Y389	107
EGFR Y1092	PKP3 Y84	107
PKP3 Y195	CBL Y552	107
EFNB1 Y343	CBL Y552	106
EPHB1 Y594 Y600	EPHA2 Y772	106
EPHB4 Y590 Y596	GPRC5A Y317	106
INSR Y1189	PLEKHA6 Y492	106
TOM1L2 Y192 Y200	CBL Y552	106
EGFR Y1172	RIN1 Y36	106
RIN1 Y36	SHC1 Y349	106
RIN1 Y36	CTNND1 Y334	106
PIK3R1 Y607	AHCYL1 Y28	106
CBL Y552	CTNND1 Y334	106
CBL Y552	CTNND1 Y334 Y321	106
BCAR1 Y327	PTK2 Y576	105
PHLPP1 Y1712	CBL Y552	105
TOM1L2 Y192 Y200	TNS3 S332 Y354	105
EGFR Y1172	MAPK1 Y187	105
EPHA2 Y588 Y594	EPHB1 Y600	105
EPHB1 Y600	ITGB4 Y1207	105
EFNB1 Y343	RIN1 Y36	104
TFRC Y20	ANXA2 Y30	104
EGFR Y1172	SHC1 Y349	104
EGFR Y1172	EGFR Y1069 Y1092	104
ARHGEF5 Y1097 Y1100	ATA2 Y20	104
CAV1 Y14	PXN Y118	104
PLCG1 Y775	STAT3 Y704	104
PLCG1 Y775	MAPK3 Y204	104
TNK2 Y859	TOM1L2 Y192 Y200	103
AFAP1L2 Y413	ATA2 Y20	103
EGFR Y1172	EPS15 Y849	103
ENO1 Y44	GPRC5A Y317	103
EPHB1 Y594 Y600	PTK2 Y576	102
FAM59A Y453	MAPK3 Y204	102
TFRC Y20	BCAR1 Y249	102
EPHA2 Y772	SKT Y393	102
RIN1 Y36	PLEKHA5 Y128 Y134	102
PLCG1 Y775	AHCYL1 Y28	102
PLCG1 Y775	STAT3 Y705	102
EGFR Y1092	AHCYL1 Y28	102
EFNB2 Y304	PRPF4B Y849	102
PXN Y118	SKT Y393	102
EPHB1 Y600	GSK3B Y216	102
PLCG1 Y783 Y775	TNS3 S332 Y354	101
ACP1 Y132	STAM Y381	101
PHLPP1 Y1712	RIN1 Y36	101
TNS3 S332 Y354	RIN1 Y36	101
TNS3 S332 Y354	EGFR Y1069 Y1092	101
ARHGEF5 Y1097 Y1100	CAV1 Y14 Y6 Y25	101
ARHGEF5 Y1097 Y1100	SHC1 Y349 Y350	101
PIK3R1 Y607	STAT3 Y704	101
EGFR Y1069 Y1092	INPPL1 Y986 S1003	101
CAV1 Y14	EPHB1 Y600	101
INPPL1 Y986 S1003	PKP3 Y84	101
PLEKHA6 Y492	PTPN11 Y62	101
PLCG1 Y783 Y775	CBL Y552	100
EPHA1 Y781	PLEKHA6 Y492	100
ENO1 Y44	ATA2 Y20	100
CAV1 Y14	PLEKHA6 Y492	100
EFNB2 Y304	GSK3B Y216	100
PLEKHA6 Y492	ITGB4 Y1207	100
ACP1 Y132	STAM2 Y374	99
BCAR1 Y327	EPHA2 Y594	99
BCAR1 Y327	FRK Y497	99
EGFR S1166 Y1172	RIN1 Y36	99
RIN1 Y36	PTPN18 Y389	99
ARHGEF5 Y1097 Y1100	EGFR Y1069 Y1092	99
PIK3R1 Y607	STAT3 Y705	99
INPPL1 Y986 S1003	STAT3 Y705	99
CDC2 Y15	PLEKHA6 Y492	99
TNK2 Y859	TNS3 S332 Y354	98
PLCG1 Y783 Y775	EGFR Y1172	98
EPHB1 Y594 Y600	EPHA2 Y594	98
INSR Y1189	GSK3B Y216	98
RIN1 Y36	PKP3 Y195	98
PIK3R1 Y607	EGFR Y1069 Y1092	98
PLCG1 Y775	PKP3 Y84	98
INPPL1 Y986 S1003	STAT3 Y704	98
EPHB1 Y600	PRPF4B Y849	98
PKP3 Y84	CBL Y552	98
PLCG1 Y783 Y775	PIK3R1 Y607	97
EPHB1 Y594 Y600	FRK Y497	97
TNS3 S332 Y354	STAT3 Y705	97
TNS3 S332 Y354	STAT3 Y704	97
TNS3 S776 Y780	STAT3 Y704	97
TNK2 Y859 Y860	MAPK1 Y187	97
INPPL1 Y986 S1003	ARHGEF5 Y1097	97
SHC1 Y427	CBL Y552	97
PLEKHA6 Y492	GSK3B Y216	97
ERBB2 Y1248	ARHGEF5 Y1097	96
EGFR Y998	ARHGEF5 Y1097	96
INSR Y1189	PRPF4B Y849	96
TNK2 Y859 Y860	SHC1 Y427	96
CAV1 Y14	PTPRA Y798	96
STAT3 Y705	CBL Y552	96
PTK2 Y576	SKT Y393	96
TNK2 Y859	TNS3 S776 Y780	95
TNK2 Y859	PTPN18 Y389	95
ERBB2 Y1248	ARHGEF5 Y1097 Y1100	95
PLCG1 Y783 Y775	INPPL1 Y986 S1003	95
BCAR1 Y327	EPHB1 Y600	95
EPHB4 Y590 Y596	INSR Y1189	95
TFRC Y20	EPHB4 Y596	95
TNS3 S332 Y354	TNS3 S776 Y780	95
EPHB4 Y596	ITGB4 Y1207	95
TNS3 S776 Y780	STAT3 Y705	95
PIK3R1 Y607	PKP3 Y84	95
ENO1 Y44	CAV1 Y14	95
DKFZp761P0423 Y411	PLEKHA5 Y128 Y134	95
SHC1 Y349	EPS15 Y849	95
EPHA2 Y588 Y594	PTPN11 Y62	95
ARHGEF5 Y1097	CTNND1 Y334 Y321	95
CBL Y552	STAT3 Y704	95
PLCG1 Y783 Y775	ARHGEF5 Y1097 Y1100	94
EPHA1 Y781	EPHB1 Y600	94
TFRC Y20	GIT1 Y545	94
TNS3 S332 Y354	PXN Y118	94
EPHB4 Y596	PTPN11 Y62	94
EGFR Y1092	ARHGEF5 Y1097	94
INPPL1 Y986 S1003	PTPN18 Y389	94
EFNB2 Y304	CDC2 Y15	94
GPRC5A Y317	BCAR1 Y249	94
PLEKHA6 Y492	PRPF4B Y849	94
ITGB4 Y1207	GIT1 Y545	94
EGFR Y998	RIN1 Y36	93
EPHB1 Y594 Y600	EPHB1 Y600	93
MARVELD2 Y23	CCDC50 Y145	93
TNS3 S332 Y354	PKP3 Y84	93
ENO1 Y44	SKT Y393	93
DKFZp761P0423 Y411	EPHB1 Y600	93
GPRC5A Y317	SKT Y393	93
GSK3B Y216	GIT1 Y545	93
SKT Y393	PTPRA Y798	93
PTPN11 Y62	GIT1 Y545	93
TNK2 Y859	PLCG1 Y775	92
EGFR Y998	ARHGEF5 Y1097 Y1100	92
ACP1 Y132	TFRC Y20	92
EPHB4 Y590 Y596	PRPF4B Y849	92
INSR Y1189	EPHA2 Y594	92
INSR Y1189	FRK Y497	92
TOM1L2 Y192 Y200	AHCYL1 Y28	92
EPHA2 Y772	GPRC5A Y317	92
ARHGEF5 Y1097 Y1100	CTNND1 Y334 Y321	92
CAV1 Y14 Y6 Y25	TNK2 Y859 Y860	92
EGFR Y1069 Y1092	CBL Y552	92
EPHA2 Y588 Y594	ITGB4 Y1207	92
ARHGEF5 Y1097	PKP3 Y195	92
TNK2 Y859	MARVELD2 Y23	91
TNK2 Y859	ARHGEF5 Y1097	91
BCAR1 Y327	EPHA1 Y781	91
FAM59A Y453	INSR Y1189	91
EPHB4 Y590 Y596	GSK3B Y216	91
INSR Y1189	RIN1 Y36	91
TFRC Y20	PLEKHA6 Y492	91
TNS3 S776 Y780	PKP3 Y84	91
DKFZp761P0423 Y411	EPHA2 Y588 Y594	91
SHC1 Y427	RBCK1 Y330	91
ATA2 Y20	PTPRA Y798	91
TNK2 Y859	ARHGEF5 Y1097 Y1100	90
CTTN Y446	INSR Y1189	90
CTTN Y446	AFAP1L2 Y413	90
MARVELD2 Y23	TNS3 S332 Y354	90
INSR Y1189	EFNB2 Y304	90
TNS3 S332 Y354	ENO1 Y44	90
EPHB4 Y596	GSK3B Y216	90
EPHB4 Y596	PRPF4B Y849	90
PRPF4B Y849	GIT1 Y545	90
EFNB1 Y343	ARHGEF5 Y1097 Y1100	89
EFNB1 Y343	ARHGEF5 Y1097	89
EPHA1 Y781	SKT Y393	89
ARHGEF5 Y1097 Y1100	CTNND1 Y334	89
TNK2 Y859 Y860	ARHGEF5 Y1097	89
ARHGEF5 Y1097	CTNND1 Y334	89
PXN Y118	AHCYL1 Y28	89
BCAR1 Y249	ITGB4 Y1207	89
ACP1 Y132	SHC1 Y349 Y350	88
EPHB4 Y590 Y596	CAV1 Y14	88
INSR Y1189	CAV1 Y14 Y6 Y25	88
CCDC50 Y145	TNS3 S776 Y780	88
DKFZp761P0423 Y411	BCAR1 Y249	88
CAV1 Y14	EFNB2 Y304	88
ARHGEF5 Y1097	CBL Y552	88
BCAR1 Y249	PTPN11 Y62	88
EPHB1 Y594 Y600	PLEKHA6 Y492	87
PHLPP1 Y1712	ARHGEF5 Y1097	87
TFRC Y20	EPHB1 Y600	87
PIK3R1 Y607	SHC1 Y349 Y350	87
PXN Y118	GPRC5A Y317	87
EPHB1 Y594 Y600	EPHA1 Y781	86
BCAR1 Y327	PLEKHA6 Y492	86
MARVELD2 Y23	STAT3 Y704	86
AFAP1L2 Y413	EPHB1 Y600	86
PHLPP1 Y1712	ARHGEF5 Y1097 Y1100	86
PIK3R1 Y607	SHC1 Y349	86
DKFZp761P0423 Y411	PLEKHA6 Y492	86
TNK2 Y859 Y860	SHC1 Y349 Y350	86
EPHA2 Y588 Y594	SKT Y393	86
CBL Y552	PTPN18 Y389	86
ARHGEF5 Y1097 Y1100	PKP3 Y195	85
ENO1 Y44	AHCYL1 Y28	85
DKFZp761P0423 Y411	EFNB2 Y304	85
TNK2 Y859 Y860	SHC1 Y349	85
EGFR Y1069 Y1092	STAT3 Y704	85
AHCYL1 Y28	STAT3 Y704	85
CTTN Y446	SKT Y393	84
PLCG1 Y783 Y775	STAT3 Y704	84
MARVELD2 Y23	STAT3 Y705	84
FAM59A Y453	ARHGEF5 Y1097 Y1100	84
RIN1 Y36	EGFR Y1092	84
ARHGEF5 Y1097 Y1100	EPS15 Y849	84
PIK3R1 Y607	SHC1 Y427	84
DKFZp761P0423 Y411	GIT1 Y545	84
TNK2 Y859 Y860	MAPK3 Y204	84
CAV1 Y14	FRK Y497	84
CTTN Y446	DKFZp761P0423 Y411	83
CTTN Y446	CDC2 Y15	83
ACP1 Y132	PTK2 Y576	83
MARVELD2 Y23	ATA2 Y20	83
CCDC50 Y145	CAV1 Y14 Y6 Y25	83
TNS3 S776 Y780	ARHGEF5 Y1097	83
ENO1 Y44	EPHB1 Y600	83
EGFR Y1069 Y1092	STAT3 Y705	83
CAV1 Y14	SHC1 Y349 Y350	83
AHCYL1 Y28	STAT3 Y705	83
PLCG1 Y783 Y775	STAT3 Y705	82
EPHB1 Y594 Y600	GIT1 Y545	82
BCAR1 Y327	TFRC Y20	82
BCAR1 Y327	BCAR1 Y249	82
EGFR S1166 Y1172	PTPN18 Y389	82
TNS3 S332 Y354	MAPK3 Y204	82
ARHGEF5 Y1097 Y1100	CCDC50 Y145	82
EPHA2 Y594	CAV1 Y14	82
GPRC5A Y317	FRK Y497	82
CDC2 Y15	BCAR1 Y249	82
CTTN Y446	PTPRA Y798	81
EPHB1 Y594 Y600	EPHB4 Y596	81
EPHB1 Y594 Y600	BCAR1 Y249	81
EGFR Y1172	TNS3 S332 Y354	81
EPHB4 Y596	DKFZp761P0423 Y411	81
ENO1 Y44	PLEKHA6 Y492	81
CAV1 Y14	GPRC5A Y317	81
SHC1 Y349 Y350	ATA2 Y20	81
TNK2 Y859	AHCYL1 Y28	80
TNK2 Y859	MAPK1 Y187	80
CTTN Y446	FAM59A Y453	80
EPHB1 Y594 Y600	TFRC Y20	80
MARVELD2 Y23	PKP3 Y84	80
FAM59A Y453	EPS15 Y849	80
CCDC50 Y145	INPPL1 Y986 S1003	80
ENO1 Y44	GSK3B Y216	80
EGFR Y1069 Y1092	PKP3 Y84	80
RBCK1 Y330	PTPN18 Y389	80
AHCYL1 Y28	PKP3 Y84	80
CDC2 Y15	GIT1 Y545	80
PLCG1 Y783 Y775	PKP3 Y84	79
ACP1 Y132	RBCK1 Y330	79
EPHB4 Y590 Y596	DKFZp761P0423 Y411	79
EPHB4 Y590 Y596	CDC2 Y15	79
INSR Y1189	DKFZp761P0423 Y411	79
EPHA2 Y772	GSK3B Y216	79
RIN1 Y36	TNS3 S776 Y780	79
CAV1 Y14	PLEKHA5 Y128 Y134	79
PXN Y118	GIT1 Y545	79
PLCG1 Y783 Y775	MAPK3 Y204	78
EPHA1 Y781	ANXA2 Y30	78
EPHA2 Y772	PRPF4B Y849	78
EGFR Y1172	STAT3 Y704	78
RIN1 Y36	PLCG1 Y775	78
EPHB4 Y596	PXN Y118	78
EPHA2 Y594	GPRC5A Y317	78
EGFR Y1069 Y1092	MAPK3 Y204	78
SHC1 Y349 Y350	SKT Y393	78
EGFR Y1092	EPS15 Y849	78
PXN Y118	BCAR1 Y249	78
ACP1 Y132	MAPK1 Y187	77
MARVELD2 Y23	SHC1 Y427	77
INSR Y1189	EPHA2 Y588 Y594	77
AFAP1L2 Y413	PLEKHA6 Y492	77
EGFR S1166 Y1172	MAPK1 Y187	77
TOM1L2 Y192 Y200	ARHGEF5 Y1097	77
EGFR Y1172	SHC1 Y349 Y350	77
EGFR Y1172	STAT3 Y705	77
DKFZp761P0423 Y411	PTK2 Y576	77
TNK2 Y859	CAV1 Y14 Y6 Y25	76
BCAR1 Y327	GIT1 Y545	76
EPHA1 Y781	GPRC5A Y317	76
INSR Y1189	EPHA2 Y772	76
STAM2 Y374	TNK2 Y859 Y860	76
TFRC Y20	SKT Y393	76
ARHGEF5 Y1097 Y1100	RBCK1 Y330	76
CCDC50 Y145	MAPK1 Y187	76
EPHB4 Y596	CDC2 Y15	76
PIK3R1 Y607	CAV1 Y14 Y6 Y25	76
CAV1 Y14 Y6 Y25	SKT Y393	76
EPHA2 Y594	GSK3B Y216	76
EPHA2 Y594	PRPF4B Y849	76
CAV1 Y14	PTK2 Y576	76
EPHA2 Y588 Y594	GPRC5A Y317	76
FRK Y497	GSK3B Y216	76
BCAR1 Y249	GSK3B Y216	76
ACP1 Y132	CAV1 Y14 Y6 Y25	75
ACP1 Y132	EPHA2 Y588 Y594	75
MARVELD2 Y23	AHCYL1 Y28	75
AFAP1L2 Y413	EFNB2 Y304	75
ENO1 Y44	PRPF4B Y849	75
PLCG1 Y775	ARHGEF5 Y1097	75
PXN Y118	GSK3B Y216	75
FRK Y497	PRPF4B Y849	75
ACP1 Y132	FAM59A Y453	74
EPHA1 Y781	PRPF4B Y849	74
AFAP1L2 Y413	BCAR1 Y249	74
TFRC Y20	PRPF4B Y849	74
TNS3 S776 Y780	AHCYL1 Y28	74
GPRC5A Y317	PTK2 Y576	74
PTK2 Y576	GSK3B Y216	74
ACP1 Y132	EPHA1 Y781	73
EPHB1 Y594 Y600	ENO1 Y44	73
BCAR1 Y327	EPHB4 Y596	73
INSR Y1189	PTPN11 Y62	73
STAM Y381	TNK2 Y859 Y860	73
TFRC Y20	GSK3B Y216	73
EPHA2 Y772	DKFZp761P0423 Y411	73
CCDC50 Y145	SHC1 Y349 Y350	73
DKFZp761P0423 Y411	FRK Y497	73
INPPL1 Y986 S1003	RBCK1 Y330	73
EPHB1 Y600	PTPRA Y798	73
STAT3 Y704	MAPK3 Y204	73
TNK2 Y859	SHC1 Y349	72
EPHA1 Y781	INSR Y1189	72
EPHA1 Y781	GSK3B Y216	72
INSR Y1189	ITGB4 Y1207	72
EPHA2 Y772	CDC2 Y15	72
EGFR Y1172	PKP3 Y84	72
PIK3R1 Y607	ATA2 Y20	72
SHC1 Y349	RBCK1 Y330	72
PTK2 Y576	PRPF4B Y849	72
BCAR1 Y249	ATA2 Y20	72
EPHB1 Y594 Y600	INSR Y1189	71
EPHB1 Y594 Y600	PXN Y118	71
TFRC Y20	GPRC5A Y317	71
TOM1L2 Y192 Y200	RIN1 Y36	71
CAV1 Y14	SHC1 Y427	71
EPHA2 Y588 Y594	PXN Y118	71
EPHA2 Y588 Y594	GSK3B Y216	71
PXN Y118	PRPF4B Y849	71
STAT3 Y705	MAPK3 Y204	71
BCAR1 Y249	PRPF4B Y849	71
BCAR1 Y327	ENO1 Y44	70
EPHA1 Y781	CAV1 Y14	70
EPHB4 Y590 Y596	ENO1 Y44	70
EPHA2 Y772	CAV1 Y14	70
EGFR Y1172	CAV1 Y14 Y6 Y25	70
RIN1 Y36	AHCYL1 Y28	70
RIN1 Y36	SKT Y393	70
ENO1 Y44	BCAR1 Y249	70
GSK3B Y216	SKT Y393	70
TNK2 Y859	EPS15 Y849	69
PLCG1 Y783 Y775	RIN1 Y36	69
ACP1 Y132	EPHA2 Y594	69
AFAP1L2 Y413	GIT1 Y545	69
RIN1 Y36	EGFR Y1069 Y1092	69
RIN1 Y36	INPPL1 Y986 S1003	69
RIN1 Y36	CBL Y552	69
ENO1 Y44	EFNB2 Y304	69
ENO1 Y44	ITGB4 Y1207	69
ENO1 Y44	PTPN11 Y62	69
ENO1 Y44	GIT1 Y545	69
DKFZp761P0423 Y411	SKT Y393	69
TNK2 Y859 Y860	PKP3 Y84	69
EPHA2 Y588 Y594	PRPF4B Y849	69
EGFR Y1092	PTPN18 Y389	69
INPPL1 Y986 S1003	MAPK1 Y187	69
AHCYL1 Y28	MAPK3 Y204	69
BCAR1 Y249	PTPRA Y798	69
TNK2 Y859	SHC1 Y349 Y350	68
EGFR Y998	PTPN18 Y389	68
ACP1 Y132	EPHA2 Y772	68
FAM59A Y453	PLEKHA5 Y128 Y134	68
EGFR Y1172	TNK2 Y859 Y860	68
EGFR Y1172	ATA2 Y20	68
ARHGEF5 Y1097 Y1100	STAT3 Y704	68
DKFZp761P0423 Y411	EPHA2 Y594	68
SHC1 Y349	CAV1 Y14	68
SHC1 Y349	ATA2 Y20	68
CAV1 Y14	MAPK1 Y187	68
INPPL1 Y986 S1003	EPS15 Y849	68
SHC1 Y427	ATA2 Y20	68
PXN Y118	FRK Y497	68
PKP3 Y84	MAPK3 Y204	68
PKP3 Y195	PTPN18 Y389	68
TNK2 Y859	RIN1 Y36	67
TNK2 Y859	SHC1 Y427	67
ERBB2 Y1248	PTPN18 Y389	67
EPHA2 Y772	ENO1 Y44	67
EGFR Y1172	AHCYL1 Y28	67
TNS3 S332 Y354	INPPL1 Y986 S1003	67
CCDC50 Y145	ARHGEF5 Y1097	67
PIK3R1 Y607	TNK2 Y859 Y860	67
PIK3R1 Y607	EPS15 Y849	67
EPHA2 Y594	PXN Y118	67
EPHA2 Y588 Y594	CDC2 Y15	67
PXN Y118	EPHB1 Y600	67
PXN Y118	PLEKHA6 Y492	67
PLEKHA6 Y492	PTPRA Y798	67
SKT Y393	MAPK1 Y187	67
CTNND1 Y334 Y321	PTPN18 Y389	67
CTTN Y446	CAV1 Y14 Y6 Y25	66
PLCG1 Y783 Y775	SHC1 Y349	66
BCAR1 Y327	INSR Y1189	66
BCAR1 Y327	PXN Y118	66
EPHA1 Y781	DKFZp761P0423 Y411	66
AFAP1L2 Y413	EPHB4 Y596	66
TFRC Y20	DKFZp761P0423 Y411	66
ARHGEF5 Y1097 Y1100	STAT3 Y705	66
CAV1 Y14 Y6 Y25	CBL Y552	66
CAV1 Y14	EPHA2 Y588 Y594	66
PLCG1 Y775	EPS15 Y849	66
PXN Y118	ITGB4 Y1207	66
PXN Y118	PTPN11 Y62	66
SKT Y393	PRPF4B Y849	66
PTPRA Y798	GIT1 Y545	66
ERBB2 Y1248	MAPK1 Y187	65
FAM59A Y453	TNK2 Y859 Y860	65
STAM2 Y374	EPS15 Y849	65
TNS3 S332 Y354	ARHGEF5 Y1097 Y1100	65
EPHB4 Y596	ENO1 Y44	65
CAV1 Y14 Y6 Y25	INPPL1 Y986 S1003	65
MAPK1 Y187	CTNND1 Y334 Y321	65
EGFR Y998	MAPK1 Y187	64
FAM59A Y453	PIK3R1 Y607	64
INSR Y1189	PTK2 Y576	64
TOM1L2 Y192 Y200	EPS15 Y849	64
TNS3 S332 Y354	ARHGEF5 Y1097	64
TNK2 Y859 Y860	STAT3 Y705	64
TNK2 Y859 Y860	PKP3 Y195	64
TNK2 Y859 Y860	STAT3 Y704	64
PKP3 Y195	MAPK1 Y187	64
ATA2 Y20	MAPK1 Y187	64
EFNB1 Y343	PTPN18 Y389	63
ACP1 Y132	ARHGEF5 Y1097	63
STAM2 Y374	CCDC50 Y145	63
CCDC50 Y145	MAPK3 Y204	63
EPHB4 Y596	PTPRA Y798	63
PLCG1 Y775	SHC1 Y427	63
CBL Y552	MAPK1 Y187	63
PLCG1 Y783 Y775	ARHGEF5 Y1097	62
EGFR Y998	TNK2 Y859 Y860	62
EPHB4 Y590 Y596	PXN Y118	62
INSR Y1189	PLEKHA5 Y128 Y134	62
PHLPP1 Y1712	PTPN18 Y389	62
TFRC Y20	ATA2 Y20	62
TNS3 S332 Y354	CBL Y552	62
ARHGEF5 Y1097 Y1100	PKP3 Y84	62
EGFR Y1069 Y1092	ARHGEF5 Y1097	62
ARHGEF5 Y1097	AHCYL1 Y28	62
GPRC5A Y317	ATA2 Y20	62
CTNND1 Y334	PTPN18 Y389	62
TNK2 Y859	PLCG1 Y783 Y775	61
TNK2 Y859	EGFR Y1069 Y1092	61
ERBB2 Y1248	ATA2 Y20	61
EFNB1 Y343	MAPK1 Y187	61
EPHB4 Y590 Y596	AFAP1L2 Y413	61
EGFR S1166 Y1172	TNK2 Y859 Y860	61
STAM Y381	CCDC50 Y145	61
STAM Y381	EPS15 Y849	61
RIN1 Y36	EPS15 Y849	61
RIN1 Y36	STAT3 Y704	61
CAV1 Y14	ARHGEF5 Y1097	61
EFNB2 Y304	PTPRA Y798	61
CTNND1 Y334	MAPK1 Y187	61
ERBB2 Y1248	PLEKHA5 Y128 Y134	60
EFNB1 Y343	TNK2 Y859 Y860	60
FAM59A Y453	CCDC50 Y145	60
INSR Y1189	SHC1 Y349 Y350	60
PHLPP1 Y1712	TNK2 Y859 Y860	60
PHLPP1 Y1712	MAPK1 Y187	60
TFRC Y20	CAV1 Y14	60
ENO1 Y44	EPHA2 Y588 Y594	60
PLEKHA5 Y128 Y134	CTNND1 Y334 Y321	60
ACP1 Y132	FRK Y497	59
AFAP1L2 Y413	PLEKHA5 Y128 Y134	59
EGFR S1166 Y1172	EPS15 Y849	59
RIN1 Y36	STAT3 Y705	59
RBCK1 Y330	CBL Y552	59
CTNND1 Y334	PLEKHA5 Y128 Y134	59
ATA2 Y20	CTNND1 Y334 Y321	59
TNK2 Y859	FAM59A Y453	58
ERBB2 Y1248	TNK2 Y859 Y860	58
PLCG1 Y783 Y775	PLEKHA5 Y128 Y134	58
EFNB1 Y343	PLEKHA5 Y128 Y134	58
EPHB1 Y594 Y600	SKT Y393	58
MARVELD2 Y23	RBCK1 Y330	58
MARVELD2 Y23	PTPN18 Y389	58
INSR Y1189	SHC1 Y427	58
PHLPP1 Y1712	PLEKHA5 Y128 Y134	58
EPHA2 Y772	PXN Y118	58
TNS3 S332 Y354	CAV1 Y14 Y6 Y25	58
ANXA2 Y30	TNK2 Y859 Y860	58
TNK2 Y859 Y860	INPPL1 Y986 S1003	58
TNK2 Y859 Y860	CTNND1 Y334 Y321	58
SHC1 Y349	EGFR Y1069 Y1092	58
EGFR Y1069 Y1092	PLEKHA5 Y128 Y134	58
CAV1 Y14	GSK3B Y216	58
SHC1 Y349 Y350	INPPL1 Y986 S1003	58
EGFR Y1092	MAPK1 Y187	58
ITGB4 Y1207	SKT Y393	58
SKT Y393	PTPN11 Y62	58
EPHA1 Y781	PXN Y118	57
EPHB4 Y590 Y596	PTPRA Y798	57
INSR Y1189	SHC1 Y349	57
EGFR S1166 Y1172	SHC1 Y349 Y350	57
TNS3 S776 Y780	SHC1 Y427	57
TNK2 Y859 Y860	CTNND1 Y334	57
EPHA2 Y594	CDC2 Y15	57
EPHA2 Y588 Y594	PTPRA Y798	57
EGFR Y1092	SHC1 Y427	57
PXN Y118	PTK2 Y576	57
CDC2 Y15	FRK Y497	57
PKP3 Y195	PLEKHA5 Y128 Y134	57
CTNND1 Y334	ATA2 Y20	57
SKT Y393	PLEKHA5 Y128 Y134	57
CTTN Y446	ERBB2 Y1248	56
CTTN Y446	PLCG1 Y783 Y775	56
CTTN Y446	EGFR Y1069 Y1092	56
EFNB1 Y343	ATA2 Y20	56
ACP1 Y132	PTPN18 Y389	56
EPHA1 Y781	CDC2 Y15	56
AFAP1L2 Y413	EPHA2 Y772	56
AFAP1L2 Y413	EPHA2 Y588 Y594	56
EGFR Y1172	CCDC50 Y145	56
ARHGEF5 Y1097 Y1100	AHCYL1 Y28	56
CAV1 Y14 Y6 Y25	PLEKHA5 Y128 Y134	56
CAV1 Y14	PRPF4B Y849	56
CAV1 Y14	PTPN18 Y389	56
EFNB2 Y304	PXN Y118	56
CTTN Y446	TFRC Y20	55
CTTN Y446	CTNND1 Y334 Y321	55
BCAR1 Y327	PLEKHA5 Y128 Y134	55
FAM59A Y453	EGFR Y1172	55
PHLPP1 Y1712	ATA2 Y20	55
ANXA2 Y30	CCDC50 Y145	55
DKFZp761P0423 Y411	CAV1 Y14	55
TNK2 Y859 Y860	EGFR Y1092	55
PLCG1 Y775	PTPN18 Y389	55
PTK2 Y576	CDC2 Y15	55
PTK2 Y576	ATA2 Y20	55
PKP3 Y195	ATA2 Y20	55
PLEKHA5 Y128 Y134	PTPRA Y798	55
ACP1 Y132	RIN1 Y36	54
BCAR1 Y327	SKT Y393	54
TNS3 S332 Y354	ATA2 Y20	54
RIN1 Y36	PKP3 Y84	54
ANXA2 Y30	EPS15 Y849	54
ENO1 Y44	EPHA2 Y594	54
ENO1 Y44	FRK Y497	54
SHC1 Y349 Y350	CBL Y552	54
CDC2 Y15	PLEKHA5 Y128 Y134	54
CTTN Y446	EFNB1 Y343	53
CTTN Y446	CTNND1 Y334	53
ERBB2 Y1248	SHC1 Y349 Y350	53
PLCG1 Y783 Y775	CCDC50 Y145	53
PLCG1 Y783 Y775	RBCK1 Y330	53
EPHA1 Y781	AFAP1L2 Y413	53
EPHA1 Y781	PTPRA Y798	53
FAM59A Y453	TNS3 S332 Y354	53
EGFR S1166 Y1172	ATA2 Y20	53
TOM1L2 Y192 Y200	TNK2 Y859 Y860	53
EGFR Y1172	RBCK1 Y330	53
ARHGEF5 Y1097 Y1100	TNK2 Y859 Y860	53
TNS3 S776 Y780	RBCK1 Y330	53
CAV1 Y14 Y6 Y25	RBCK1 Y330	53
TNK2 Y859 Y860	CBL Y552	53
SHC1 Y349 Y350	CTNND1 Y334 Y321	53
INPPL1 Y986 S1003	AHCYL1 Y28	53
ARHGEF5 Y1097	STAT3 Y705	53
ARHGEF5 Y1097	STAT3 Y704	53
EPS15 Y849	CBL Y552	53
ATA2 Y20	GIT1 Y545	53
ACP1 Y132	EPHB4 Y590 Y596	52
EPHA1 Y781	ATA2 Y20	52
INSR Y1189	TFRC Y20	52
TOM1L2 Y192 Y200	SHC1 Y427	52
TOM1L2 Y192 Y200	PTPN18 Y389	52
RIN1 Y36	TNK2 Y859 Y860	52
EPHB4 Y596	ATA2 Y20	52
TNS3 S776 Y780	ATA2 Y20	52
DKFZp761P0423 Y411	ATA2 Y20	52
EPS15 Y849	PKP3 Y195	52
CTTN Y446	PHLPP1 Y1712	51
CTTN Y446	PKP3 Y195	51
INSR Y1189	MAPK1 Y187	51
EPHA2 Y772	PTPRA Y798	51
RIN1 Y36	CDC2 Y15	51
TNK2 Y859 Y860	PLCG1 Y775	51
SHC1 Y349 Y350	RBCK1 Y330	51
RBCK1 Y330	MAPK1 Y187	51
RBCK1 Y330	MAPK3 Y204	51
AHCYL1 Y28	CBL Y552	51
CBL Y552	ATA2 Y20	51
GSK3B Y216	ATA2 Y20	51
ATA2 Y20	PTPN18 Y389	51
CTTN Y446	BCAR1 Y249	50
EGFR Y998	EPS15 Y849	50
EGFR Y998	ATA2 Y20	50
ACP1 Y132	PLEKHA5 Y128 Y134	50
ACP1 Y132	MAPK3 Y204	50
EPHB1 Y594 Y600	CAV1 Y14	50
INSR Y1189	PTPN18 Y389	50
TFRC Y20	PTPRA Y798	50
TNS3 S332 Y354	SHC1 Y349 Y350	50
TNS3 S332 Y354	MAPK1 Y187	50
TNS3 S332 Y354	PTPN18 Y389	50
EGFR Y1069 Y1092	RBCK1 Y330	50
PLCG1 Y775	ATA2 Y20	50
INPPL1 Y986 S1003	ATA2 Y20	50
ARHGEF5 Y1097	PKP3 Y84	50
EGFR Y998	PLEKHA5 Y128 Y134	49
FAM59A Y453	CBL Y552	49
AFAP1L2 Y413	EPHA2 Y594	49
AFAP1L2 Y413	PTK2 Y576	49
AFAP1L2 Y413	FRK Y497	49
ENO1 Y44	PTK2 Y576	49
EPHA2 Y594	PTPRA Y798	49
EGFR Y1069 Y1092	SHC1 Y427	49
SHC1 Y349 Y350	CTNND1 Y334	49
EGFR Y1092	ATA2 Y20	49
RBCK1 Y330	ARHGEF5 Y1097	49
PTK2 Y576	PTPRA Y798	49
FRK Y497	PTPRA Y798	49
TNK2 Y859	CCDC50 Y145	48
CTTN Y446	GPRC5A Y317	48
ERBB2 Y1248	EPS15 Y849	48
EFNB1 Y343	SHC1 Y349 Y350	48
EFNB1 Y343	EPS15 Y849	48
BCAR1 Y327	CAV1 Y14	48
EPHA1 Y781	ENO1 Y44	48
FAM59A Y453	CDC2 Y15	48
PHLPP1 Y1712	EPS15 Y849	48
SHC1 Y349	EGFR Y1092	48
EPS15 Y849	CTNND1 Y334 Y321	48
EGFR Y998	SHC1 Y349 Y350	47
ACP1 Y132	PIK3R1 Y607	47
ACP1 Y132	BCAR1 Y249	47
EPHB1 Y594 Y600	PLEKHA5 Y128 Y134	47
MARVELD2 Y23	CAV1 Y14 Y6 Y25	47
MARVELD2 Y23	MAPK1 Y187	47
FAM59A Y453	INPPL1 Y986 S1003	47
AFAP1L2 Y413	RIN1 Y36	47
PHLPP1 Y1712	SHC1 Y349 Y350	47
TFRC Y20	PLEKHA5 Y128 Y134	47
RIN1 Y36	CCDC50 Y145	47
CAV1 Y14	MAPK3 Y204	47
SHC1 Y349 Y350	PKP3 Y195	47
PLCG1 Y775	PLEKHA5 Y128 Y134	47
EPHB1 Y600	ATA2 Y20	47
EPS15 Y849	CTNND1 Y334	47
ATA2 Y20	PRPF4B Y849	47
CTTN Y446	PLCG1 Y775	46
INSR Y1189	ARHGEF5 Y1097	46
AFAP1L2 Y413	TFRC Y20	46
TFRC Y20	CDC2 Y15	46
RIN1 Y36	PXN Y118	46
ANXA2 Y30	SHC1 Y349 Y350	46
ANXA2 Y30	EFNB2 Y304	46
ARHGEF5 Y1097 Y1100	CAV1 Y14	46
CAV1 Y14 Y6 Y25	CDC2 Y15	46
CAV1 Y14	ITGB4 Y1207	46
CAV1 Y14	PTPN11 Y62	46
PLCG1 Y775	MAPK1 Y187	46
AHCYL1 Y28	MAPK1 Y187	46
AHCYL1 Y28	PTPN18 Y389	46
PLEKHA6 Y492	ATA2 Y20	46
CTTN Y446	EGFR Y998	45
ERBB2 Y1248	CAV1 Y14 Y6 Y25	45
PLCG1 Y783 Y775	ATA2 Y20	45
ACP1 Y132	EPS15 Y849	45
CCDC50 Y145	EGFR Y1069 Y1092	45
CAV1 Y14 Y6 Y25	CTNND1 Y334	45
CAV1 Y14 Y6 Y25	CTNND1 Y334 Y321	45
SHC1 Y349	PLCG1 Y775	45
EGFR Y1069 Y1092	ATA2 Y20	45
ARHGEF5 Y1097	PLEKHA5 Y128 Y134	45
FRK Y497	ATA2 Y20	45
CTTN Y446	EPHB1 Y594 Y600	44
CTTN Y446	BCAR1 Y327	44
EFNB1 Y343	CAV1 Y14 Y6 Y25	44
ACP1 Y132	EFNB2 Y304	44
EPHB1 Y594 Y600	ATA2 Y20	44
MARVELD2 Y23	EPS15 Y849	44
EGFR S1166 Y1172	CAV1 Y14 Y6 Y25	44
EGFR S1166 Y1172	PLEKHA5 Y128 Y134	44
TOM1L2 Y192 Y200	PLEKHA5 Y128 Y134	44
TOM1L2 Y192 Y200	MAPK1 Y187	44
ANXA2 Y30	CAV1 Y14 Y6 Y25	44
TNS3 S776 Y780	PTPN18 Y389	44
DKFZp761P0423 Y411	AHCYL1 Y28	44
EPHA2 Y594	ATA2 Y20	44
SHC1 Y349 Y350	PLEKHA5 Y128 Y134	44
STAT3 Y704	PLEKHA5 Y128 Y134	44
CTTN Y446	EGFR S1166 Y1172	43
PLCG1 Y783 Y775	SHC1 Y427	43
ACP1 Y132	EPHB4 Y596	43
AFAP1L2 Y413	STAT3 Y705	43
AFAP1L2 Y413	STAT3 Y704	43
EGFR S1166 Y1172	SHC1 Y349	43
PHLPP1 Y1712	CAV1 Y14 Y6 Y25	43
TOM1L2 Y192 Y200	ATA2 Y20	43
TNS3 S332 Y354	TNK2 Y859 Y860	43
ANXA2 Y30	EPHA2 Y594	43
TNK2 Y859 Y860	AHCYL1 Y28	43
EPHA2 Y588 Y594	ATA2 Y20	43
PLCG1 Y775	RBCK1 Y330	43
RBCK1 Y330	PRPF4B Y849	43
STAT3 Y705	PLEKHA5 Y128 Y134	43
PKP3 Y84	PTPN18 Y389	43
PLEKHA5 Y128 Y134	MAPK3 Y204	43
CTTN Y446	TOM1L2 Y192 Y200	42
CTTN Y446	SHC1 Y349 Y350	42
CTTN Y446	PTK2 Y576	42
CTTN Y446	GSK3B Y216	42
EGFR Y998	CAV1 Y14 Y6 Y25	42
ACP1 Y132	PLEKHA6 Y492	42
ACP1 Y132	GIT1 Y545	42
FAM59A Y453	TFRC Y20	42
EPHB4 Y590 Y596	ANXA2 Y30	42
AFAP1L2 Y413	PKP3 Y84	42
RIN1 Y36	ENO1 Y44	42
PIK3R1 Y607	PLEKHA5 Y128 Y134	42
EGFR Y1092	PLEKHA5 Y128 Y134	42
GPRC5A Y317	EPS15 Y849	42
BCAR1 Y249	PLEKHA5 Y128 Y134	42
CTTN Y446	EGFR Y1092	41
CTTN Y446	PRPF4B Y849	41
ANXA2 Y30	PTPN11 Y62	41
CAV1 Y14 Y6 Y25	AHCYL1 Y28	41
CAV1 Y14 Y6 Y25	PKP3 Y195	41
EPHA2 Y588 Y594	PLEKHA5 Y128 Y134	41
AHCYL1 Y28	ATA2 Y20	41
ITGB4 Y1207	ATA2 Y20	41
ATA2 Y20	PTPN11 Y62	41
TNK2 Y859	AFAP1L2 Y413	40
CTTN Y446	ITGB4 Y1207	40
CTTN Y446	PTPN11 Y62	40
MARVELD2 Y23	PLEKHA5 Y128 Y134	40
STAM2 Y374	CAV1 Y14 Y6 Y25	40
STAM2 Y374	PTPN18 Y389	40
SHC1 Y349	PKP3 Y84	40
SHC1 Y349 Y350	AHCYL1 Y28	40
EFNB2 Y304	ATA2 Y20	40
ERBB2 Y1248	SHC1 Y349	39
ACP1 Y132	TNK2 Y859 Y860	39
EPHB4 Y590 Y596	ATA2 Y20	39
EGFR S1166 Y1172	SHC1 Y427	39
STAM Y381	TFRC Y20	39
TFRC Y20	PXN Y118	39
TOM1L2 Y192 Y200	SHC1 Y349	39
TNS3 S332 Y354	EPS15 Y849	39
ANXA2 Y30	ITGB4 Y1207	39
ANXA2 Y30	PTPN18 Y389	39
CAV1 Y14 Y6 Y25	PKP3 Y84	39
SHC1 Y349	SKT Y393	39
SHC1 Y349	CTNND1 Y334 Y321	39
SHC1 Y427	SKT Y393	39
AHCYL1 Y28	EPS15 Y849	39
STAT3 Y705	PTPRA Y798	39
EPS15 Y849	GSK3B Y216	39
PKP3 Y84	PLEKHA5 Y128 Y134	39
PKP3 Y84	MAPK1 Y187	39
STAT3 Y704	PTPRA Y798	39
CTTN Y446	MARVELD2 Y23	38
ERBB2 Y1248	FAM59A Y453	38
EFNB1 Y343	SHC1 Y349	38
ACP1 Y132	EGFR S1166 Y1172	38
ACP1 Y132	EPHB1 Y600	38
ACP1 Y132	AHCYL1 Y28	38
BCAR1 Y327	ATA2 Y20	38
MARVELD2 Y23	SHC1 Y349 Y350	38
FAM59A Y453	CTNND1 Y334	38
FAM59A Y453	CTNND1 Y334 Y321	38
RIN1 Y36	PTPRA Y798	38
ANXA2 Y30	MAPK1 Y187	38
CCDC50 Y145	PIK3R1 Y607	38
SHC1 Y349	CTNND1 Y334	38
SHC1 Y349 Y350	EGFR Y1092	38
RBCK1 Y330	GSK3B Y216	38
PKP3 Y84	PTPRA Y798	38
CTTN Y446	EPHA1 Y781	37
CTTN Y446	TNS3 S776 Y780	37
ERBB2 Y1248	ACP1 Y132	37
ERBB2 Y1248	SHC1 Y427	37
EGFR Y998	SHC1 Y349	37
EFNB1 Y343	FAM59A Y453	37
ACP1 Y132	CTNND1 Y334 Y321	37
FAM59A Y453	AFAP1L2 Y413	37
INSR Y1189	ARHGEF5 Y1097 Y1100	37
INSR Y1189	MAPK3 Y204	37
STAM2 Y374	TFRC Y20	37
STAM Y381	CAV1 Y14 Y6 Y25	37
TFRC Y20	ENO1 Y44	37
ANXA2 Y30	PTK2 Y576	37
TNS3 S776 Y780	EPS15 Y849	37
TNS3 S776 Y780	MAPK1 Y187	37
SHC1 Y349 Y350	PKP3 Y84	37
EGFR Y1092	RBCK1 Y330	37
SHC1 Y427	CTNND1 Y334 Y321	37
RBCK1 Y330	GPRC5A Y317	37
TNK2 Y859	ACP1 Y132	36
CTTN Y446	ARHGEF5 Y1097	36
CTTN Y446	EPHB1 Y600	36
CTTN Y446	GIT1 Y545	36
EFNB1 Y343	SHC1 Y427	36
ACP1 Y132	BCAR1 Y327	36
MARVELD2 Y23	TNK2 Y859 Y860	36
FAM59A Y453	EGFR S1166 Y1172	36
FAM59A Y453	PHLPP1 Y1712	36
FAM59A Y453	RBCK1 Y330	36
STAM Y381	PTPN18 Y389	36
PHLPP1 Y1712	SHC1 Y349	36
TNS3 S332 Y354	SHC1 Y349	36
RIN1 Y36	RBCK1 Y330	36
ANXA2 Y30	ARHGEF5 Y1097	36
ARHGEF5 Y1097 Y1100	PLEKHA5 Y128 Y134	36
TNS3 S776 Y780	PLEKHA5 Y128 Y134	36
CAV1 Y14 Y6 Y25	EGFR Y1092	36
SHC1 Y349	STAT3 Y705	36
SHC1 Y349	PKP3 Y195	36
SHC1 Y427	CTNND1 Y334	36
STAT3 Y705	MAPK1 Y187	36
STAT3 Y705	PTPN18 Y389	36
TNK2 Y859	ATA2 Y20	35
CTTN Y446	STAT3 Y705	35
CTTN Y446	PLEKHA6 Y492	35
CTTN Y446	STAT3 Y704	35
EGFR Y998	FAM59A Y453	35
EGFR Y998	SHC1 Y427	35
FAM59A Y453	AHCYL1 Y28	35
STAM2 Y374	SHC1 Y349 Y350	35
TOM1L2 Y192 Y200	RBCK1 Y330	35
EPHA2 Y772	ATA2 Y20	35
TNK2 Y859 Y860	CDC2 Y15	35
SHC1 Y349	STAT3 Y704	35
SHC1 Y427	PKP3 Y84	35
CDC2 Y15	PTPN18 Y389	35
SKT Y393	PTPN18 Y389	35
STAT3 Y704	MAPK1 Y187	35
STAT3 Y704	PTPN18 Y389	35
CTTN Y446	EPHB4 Y596	34
CTTN Y446	EPHA2 Y588 Y594	34
CTTN Y446	FRK Y497	34
EGFR Y998	ACP1 Y132	34
EFNB1 Y343	ACP1 Y132	34
ACP1 Y132	PHLPP1 Y1712	34
ACP1 Y132	PKP3 Y195	34
ACP1 Y132	CTNND1 Y334	34
FAM59A Y453	ANXA2 Y30	34
FAM59A Y453	PKP3 Y195	34
STAM Y381	SHC1 Y349 Y350	34
PHLPP1 Y1712	SHC1 Y427	34
TNS3 S332 Y354	DKFZp761P0423 Y411	34
CCDC50 Y145	CDC2 Y15	34
SHC1 Y427	PKP3 Y195	34
STAT3 Y704	ATA2 Y20	34
PLEKHA5 Y128 Y134	MAPK1 Y187	34
TNK2 Y859	RBCK1 Y330	33
TNK2 Y859	PTPRA Y798	33
CTTN Y446	EPHB4 Y590 Y596	33
CTTN Y446	PIK3R1 Y607	33
CTTN Y446	EFNB2 Y304	33
CTTN Y446	PKP3 Y84	33
CTTN Y446	MAPK3 Y204	33
ACP1 Y132	CCDC50 Y145	33
MARVELD2 Y23	FAM59A Y453	33
EPHA2 Y772	ANXA2 Y30	33
EGFR Y1172	PLEKHA5 Y128 Y134	33
TNS3 S332 Y354	SHC1 Y427	33
ANXA2 Y30	MAPK3 Y204	33
CCDC50 Y145	PLCG1 Y775	33
CCDC50 Y145	EGFR Y1092	33
CCDC50 Y145	GPRC5A Y317	33
CAV1 Y14 Y6 Y25	STAT3 Y705	33
SHC1 Y349	AHCYL1 Y28	33
EGFR Y1069 Y1092	EPS15 Y849	33
SHC1 Y349 Y350	STAT3 Y705	33
STAT3 Y705	ATA2 Y20	33
PTK2 Y576	PLEKHA5 Y128 Y134	33
EPS15 Y849	PRPF4B Y849	33
TNK2 Y859	PLEKHA5 Y128 Y134	32
CTTN Y446	EPHA2 Y594	32
PLCG1 Y783 Y775	PTPN18 Y389	32
CCDC50 Y145	GSK3B Y216	32
CAV1 Y14 Y6 Y25	STAT3 Y704	32
EGFR Y1069 Y1092	PTPN18 Y389	32
SHC1 Y349 Y350	STAT3 Y704	32
EPS15 Y849	PKP3 Y84	32
CTTN Y446	EPHA2 Y772	31
ACP1 Y132	TNS3 S332 Y354	31
ACP1 Y132	SHC1 Y349	31
ACP1 Y132	SHC1 Y427	31
FAM59A Y453	STAM2 Y374	31
FAM59A Y453	PXN Y118	31
TFRC Y20	RIN1 Y36	31
CAV1 Y14 Y6 Y25	PLCG1 Y775	31
TNK2 Y859 Y860	GPRC5A Y317	31
TNK2 Y859 Y860	GSK3B Y216	31
SHC1 Y427	STAT3 Y705	31
EPS15 Y849	CDC2 Y15	31
CTTN Y446	ARHGEF5 Y1097 Y1100	30
PLCG1 Y783 Y775	MAPK1 Y187	30
ACP1 Y132	EGFR Y1172	30
FAM59A Y453	PTPRA Y798	30
TOM1L2 Y192 Y200	CAV1 Y14 Y6 Y25	30
TOM1L2 Y192 Y200	SHC1 Y349 Y350	30
RIN1 Y36	ANXA2 Y30	30
ANXA2 Y30	PIK3R1 Y607	30
ANXA2 Y30	PLEKHA5 Y128 Y134	30
TNS3 S776 Y780	CAV1 Y14 Y6 Y25	30
EGFR Y1069 Y1092	MAPK1 Y187	30
SHC1 Y349 Y350	PLCG1 Y775	30
SHC1 Y427	AHCYL1 Y28	30
SHC1 Y427	STAT3 Y704	30
ARHGEF5 Y1097	SKT Y393	30
STAT3 Y705	EPS15 Y849	30
EPS15 Y849	STAT3 Y704	30
CTTN Y446	MAPK1 Y187	29
PLCG1 Y783 Y775	TNK2 Y859 Y860	29
PLCG1 Y783 Y775	EPS15 Y849	29
ACP1 Y132	PTPN11 Y62	29
FAM59A Y453	STAM Y381	29
FAM59A Y453	ENO1 Y44	29
FAM59A Y453	EGFR Y1092	29
FAM59A Y453	PKP3 Y84	29
STAM2 Y374	EGFR Y1172	29
STAM2 Y374	SHC1 Y427	29
TFRC Y20	EPS15 Y849	29
ANXA2 Y30	AHCYL1 Y28	29
TNS3 S776 Y780	TNK2 Y859 Y860	29
TNK2 Y859 Y860	EGFR Y1069 Y1092	29
ACP1 Y132	EGFR Y1092	28
EPHA1 Y781	PLEKHA5 Y128 Y134	28
FAM59A Y453	GPRC5A Y317	28
STAM2 Y374	EGFR Y1092	28
STAM2 Y374	MAPK1 Y187	28
STAM2 Y374	MAPK3 Y204	28
EGFR S1166 Y1172	ANXA2 Y30	28
TFRC Y20	CAV1 Y14 Y6 Y25	28
ANXA2 Y30	EPHA2 Y588 Y594	28
CCDC50 Y145	PRPF4B Y849	28
TNS3 S776 Y780	SHC1 Y349 Y350	28
PKP3 Y84	ATA2 Y20	28
PLEKHA5 Y128 Y134	PTPN18 Y389	28
TNK2 Y859	STAM Y381	27
PLCG1 Y783 Y775	PXN Y118	27
ACP1 Y132	ITGB4 Y1207	27
INSR Y1189	CCDC50 Y145	27
STAM2 Y374	EGFR S1166 Y1172	27
STAM2 Y374	RIN1 Y36	27
STAM2 Y374	PLCG1 Y775	27
STAM2 Y374	ARHGEF5 Y1097	27
STAM2 Y374	STAT3 Y704	27
STAM Y381	RIN1 Y36	27
STAM Y381	SHC1 Y427	27
STAM Y381	MAPK1 Y187	27
TOM1L2 Y192 Y200	CCDC50 Y145	27
CCDC50 Y145	ATA2 Y20	27
TNK2 Y859 Y860	PRPF4B Y849	27
EGFR Y1069 Y1092	PXN Y118	27
SHC1 Y349 Y350	CDC2 Y15	27
INPPL1 Y986 S1003	PLEKHA5 Y128 Y134	27
GPRC5A Y317	PLEKHA5 Y128 Y134	27
CBL Y552	PLEKHA5 Y128 Y134	27
GSK3B Y216	PLEKHA5 Y128 Y134	27
TNK2 Y859	CTTN Y446	26
TNK2 Y859	STAM2 Y374	26
CTTN Y446	ACP1 Y132	26
CTTN Y446	EGFR Y1172	26
ERBB2 Y1248	ANXA2 Y30	26
MARVELD2 Y23	STAM2 Y374	26
MARVELD2 Y23	STAM Y381	26
MARVELD2 Y23	CAV1 Y14	26
FAM59A Y453	STAT3 Y705	26
FAM59A Y453	BCAR1 Y249	26
AFAP1L2 Y413	CAV1 Y14 Y6 Y25	26
STAM2 Y374	TOM1L2 Y192 Y200	26
STAM2 Y374	SHC1 Y349	26
STAM2 Y374	STAT3 Y705	26
STAM2 Y374	PKP3 Y84	26
STAM Y381	SHC1 Y349	26
STAM Y381	ARHGEF5 Y1097	26
STAM Y381	PKP3 Y84	26
STAM Y381	STAT3 Y704	26
TFRC Y20	RBCK1 Y330	26
ANXA2 Y30	SHC1 Y427	26
ANXA2 Y30	CTNND1 Y334 Y321	26
CCDC50 Y145	PKP3 Y84	26
SHC1 Y427	CDC2 Y15	26
EPS15 Y849	ATA2 Y20	26
TNK2 Y859	ANXA2 Y30	25
CTTN Y446	INPPL1 Y986 S1003	25
CTTN Y446	CBL Y552	25
PLCG1 Y783 Y775	ENO1 Y44	25
EGFR Y998	STAM2 Y374	25
EFNB1 Y343	ANXA2 Y30	25
ACP1 Y132	TOM1L2 Y192 Y200	25
ACP1 Y132	ARHGEF5 Y1097 Y1100	25
ACP1 Y132	INPPL1 Y986 S1003	25
ACP1 Y132	STAT3 Y705	25
ACP1 Y132	PKP3 Y84	25
ACP1 Y132	CBL Y552	25
MARVELD2 Y23	ANXA2 Y30	25
FAM59A Y453	TNS3 S776 Y780	25
FAM59A Y453	STAT3 Y704	25
STAM2 Y374	TNS3 S776 Y780	25
STAM2 Y374	PKP3 Y195	25
EGFR S1166 Y1172	STAM Y381	25
EGFR S1166 Y1172	CCDC50 Y145	25
STAM Y381	EGFR Y1172	25
STAM Y381	TNS3 S776 Y780	25
STAM Y381	EGFR Y1092	25
STAM Y381	STAT3 Y705	25
PHLPP1 Y1712	ANXA2 Y30	25
EGFR Y1172	ANXA2 Y30	25
RIN1 Y36	GPRC5A Y317	25
ANXA2 Y30	SHC1 Y349	25
ANXA2 Y30	EGFR Y1092	25
ANXA2 Y30	CTNND1 Y334	25
CCDC50 Y145	CAV1 Y14	25
ENO1 Y44	EGFR Y1069 Y1092	25
SHC1 Y349	CDC2 Y15	25
SHC1 Y349	PLEKHA5 Y128 Y134	25
PLCG1 Y783 Y775	STAM2 Y374	24
PLCG1 Y783 Y775	CAV1 Y14 Y6 Y25	24
EGFR Y998	STAM Y381	24
EGFR Y998	ANXA2 Y30	24
EFNB1 Y343	STAM2 Y374	24
ACP1 Y132	MARVELD2 Y23	24
ACP1 Y132	DKFZp761P0423 Y411	24
ACP1 Y132	PLCG1 Y775	24
ACP1 Y132	STAT3 Y704	24
ACP1 Y132	ATA2 Y20	24
EPHA1 Y781	STAM Y381	24
FAM59A Y453	TOM1L2 Y192 Y200	24
FAM59A Y453	PLCG1 Y775	24
STAM2 Y374	PHLPP1 Y1712	24
STAM2 Y374	ARHGEF5 Y1097 Y1100	24
STAM2 Y374	EGFR Y1069 Y1092	24
STAM2 Y374	INPPL1 Y986 S1003	24
STAM2 Y374	CBL Y552	24
EGFR S1166 Y1172	RBCK1 Y330	24
STAM Y381	PHLPP1 Y1712	24
STAM Y381	TOM1L2 Y192 Y200	24
STAM Y381	PIK3R1 Y607	24
STAM Y381	PLCG1 Y775	24
STAM Y381	AHCYL1 Y28	24
STAM Y381	CBL Y552	24
STAM Y381	MAPK3 Y204	24
TFRC Y20	CCDC50 Y145	24
TFRC Y20	SHC1 Y349 Y350	24
ANXA2 Y30	FRK Y497	24
ANXA2 Y30	PKP3 Y195	24
CCDC50 Y145	AHCYL1 Y28	24
CCDC50 Y145	STAT3 Y705	24
CCDC50 Y145	STAT3 Y704	24
PIK3R1 Y607	RBCK1 Y330	24
CAV1 Y14 Y6 Y25	EGFR Y1069 Y1092	24
CAV1 Y14 Y6 Y25	GPRC5A Y317	24
EPHA2 Y588 Y594	RBCK1 Y330	24
SHC1 Y427	PLEKHA5 Y128 Y134	24
EPS15 Y849	PLEKHA5 Y128 Y134	24
CTTN Y446	SHC1 Y349	23
ERBB2 Y1248	STAM2 Y374	23
ERBB2 Y1248	CCDC50 Y145	23
PLCG1 Y783 Y775	STAM Y381	23
PLCG1 Y783 Y775	ANXA2 Y30	23
PLCG1 Y783 Y775	SHC1 Y349 Y350	23
EFNB1 Y343	STAM Y381	23
ACP1 Y132	EPHB1 Y594 Y600	23
EPHB4 Y590 Y596	PLEKHA5 Y128 Y134	23
STAM2 Y374	PIK3R1 Y607	23
STAM2 Y374	AHCYL1 Y28	23
STAM2 Y374	CTNND1 Y334 Y321	23
STAM Y381	EGFR Y1069 Y1092	23
STAM Y381	PKP3 Y195	23
EPHA2 Y772	PLEKHA5 Y128 Y134	23
ANXA2 Y30	TNS3 S776 Y780	23
ANXA2 Y30	EGFR Y1069 Y1092	23
ANXA2 Y30	PLCG1 Y775	23
ANXA2 Y30	PKP3 Y84	23
ANXA2 Y30	STAT3 Y704	23
CCDC50 Y145	CTNND1 Y334 Y321	23
EPHA2 Y594	PLEKHA5 Y128 Y134	23
EGFR Y1069 Y1092	SHC1 Y349 Y350	23
CAV1 Y14	EPS15 Y849	23
RBCK1 Y330	PKP3 Y84	23
RBCK1 Y330	STAT3 Y704	23
RBCK1 Y330	PLEKHA5 Y128 Y134	23
EFNB2 Y304	PLEKHA5 Y128 Y134	23
EPHB1 Y600	PLEKHA5 Y128 Y134	23
ITGB4 Y1207	PLEKHA5 Y128 Y134	23
PLEKHA5 Y128 Y134	PRPF4B Y849	23
PLEKHA5 Y128 Y134	PTPN11 Y62	23
CTTN Y446	ANXA2 Y30	22
CTTN Y446	SHC1 Y427	22
ERBB2 Y1248	STAM Y381	22
ERBB2 Y1248	RBCK1 Y330	22
PLCG1 Y783 Y775	ACP1 Y132	22
EGFR Y998	CCDC50 Y145	22
EGFR Y998	RBCK1 Y330	22
EFNB1 Y343	CCDC50 Y145	22
EFNB1 Y343	RBCK1 Y330	22
EPHA1 Y781	STAM2 Y374	22
FAM59A Y453	GSK3B Y216	22
INSR Y1189	TNK2 Y859 Y860	22
INSR Y1189	EPS15 Y849	22
STAM2 Y374	CTNND1 Y334	22
STAM Y381	ARHGEF5 Y1097 Y1100	22
STAM Y381	INPPL1 Y986 S1003	22
STAM Y381	CTNND1 Y334	22
STAM Y381	CTNND1 Y334 Y321	22
PHLPP1 Y1712	CCDC50 Y145	22
PHLPP1 Y1712	RBCK1 Y330	22
TFRC Y20	TNK2 Y859 Y860	22
TOM1L2 Y192 Y200	ANXA2 Y30	22
TNS3 S332 Y354	ANXA2 Y30	22
TNS3 S332 Y354	CCDC50 Y145	22
TNS3 S332 Y354	RBCK1 Y330	22
ANXA2 Y30	STAT3 Y705	22
ARHGEF5 Y1097 Y1100	SKT Y393	22
CCDC50 Y145	PKP3 Y195	22
CCDC50 Y145	CTNND1 Y334	22
PIK3R1 Y607	CAV1 Y14	22
CAV1 Y14 Y6 Y25	PTPRA Y798	22
TNK2 Y859 Y860	PLEKHA5 Y128 Y134	22
TNK2 Y859 Y860	ATA2 Y20	22
RBCK1 Y330	AHCYL1 Y28	22
RBCK1 Y330	STAT3 Y705	22
RBCK1 Y330	PKP3 Y195	22
RBCK1 Y330	CTNND1 Y334	22
RBCK1 Y330	CTNND1 Y334 Y321	22
CDC2 Y15	MAPK1 Y187	22
PLEKHA6 Y492	PLEKHA5 Y128 Y134	22
SKT Y393	MAPK3 Y204	22
PLEKHA5 Y128 Y134	GIT1 Y545	22
CTTN Y446	PTPN18 Y389	21
ACP1 Y132	TNS3 S776 Y780	21
ACP1 Y132	EGFR Y1069 Y1092	21
EPHA1 Y781	FAM59A Y453	21
MARVELD2 Y23	INSR Y1189	21
FAM59A Y453	PRPF4B Y849	21
FAM59A Y453	GIT1 Y545	21
STAM2 Y374	TNS3 S332 Y354	21
STAM Y381	TNS3 S332 Y354	21
STAM Y381	PLEKHA5 Y128 Y134	21
ANXA2 Y30	ARHGEF5 Y1097 Y1100	21
ANXA2 Y30	CBL Y552	21
RBCK1 Y330	CDC2 Y15	21
RBCK1 Y330	ATA2 Y20	21
ARHGEF5 Y1097	CDC2 Y15	21
GPRC5A Y317	PTPN18 Y389	21
ERBB2 Y1248	PXN Y118	20
FAM59A Y453	EPHB4 Y596	20
FAM59A Y453	PTK2 Y576	20
STAM2 Y374	PLEKHA5 Y128 Y134	20
STAM Y381	PRPF4B Y849	20
TFRC Y20	MAPK1 Y187	20
ANXA2 Y30	INPPL1 Y986 S1003	20
EPHB4 Y596	PLEKHA5 Y128 Y134	20
CAV1 Y14 Y6 Y25	PXN Y118	20
CAV1 Y14 Y6 Y25	GSK3B Y216	20
TNK2 Y859 Y860	CAV1 Y14	20
FRK Y497	PLEKHA5 Y128 Y134	20
TNK2 Y859	CDC2 Y15	19
CTTN Y446	EPS15 Y849	19
PLCG1 Y783 Y775	FAM59A Y453	19
ACP1 Y132	SKT Y393	19
BCAR1 Y327	ANXA2 Y30	19
FAM59A Y453	EGFR Y1069 Y1092	19
FAM59A Y453	EPHB1 Y600	19
EGFR Y1172	CAV1 Y14	19
RIN1 Y36	GSK3B Y216	19
ANXA2 Y30	BCAR1 Y249	19
ARHGEF5 Y1097 Y1100	CDC2 Y15	19
CCDC50 Y145	PLEKHA5 Y128 Y134	19
PXN Y118	PKP3 Y195	19
PXN Y118	CTNND1 Y334 Y321	19
EPS15 Y849	SKT Y393	19
CDC2 Y15	MAPK3 Y204	19
CTTN Y446	STAM Y381	18
CTTN Y446	CCDC50 Y145	18
ERBB2 Y1248	ENO1 Y44	18
EFNB1 Y343	PXN Y118	18
FAM59A Y453	EPHA2 Y594	18
FAM59A Y453	PLEKHA6 Y492	18
AFAP1L2 Y413	SHC1 Y349 Y350	18
AFAP1L2 Y413	INPPL1 Y986 S1003	18
AFAP1L2 Y413	AHCYL1 Y28	18
AFAP1L2 Y413	CBL Y552	18
STAM2 Y374	PRPF4B Y849	18
PHLPP1 Y1712	PXN Y118	18
TFRC Y20	AHCYL1 Y28	18
RIN1 Y36	DKFZp761P0423 Y411	18
RIN1 Y36	BCAR1 Y249	18
CCDC50 Y145	SKT Y393	18
CAV1 Y14 Y6 Y25	ENO1 Y44	18
CAV1 Y14 Y6 Y25	PRPF4B Y849	18
PLCG1 Y775	PXN Y118	18
PXN Y118	CTNND1 Y334	18
AHCYL1 Y28	PTPRA Y798	18
GSK3B Y216	PTPN18 Y389	18
CTTN Y446	STAM2 Y374	17
CTTN Y446	TNK2 Y859 Y860	17
CTTN Y446	RBCK1 Y330	17
EGFR Y998	PXN Y118	17
EFNB1 Y343	AFAP1L2 Y413	17
BCAR1 Y327	AHCYL1 Y28	17
FAM59A Y453	EPHA2 Y588 Y594	17
FAM59A Y453	FRK Y497	17
AFAP1L2 Y413	PHLPP1 Y1712	17
AFAP1L2 Y413	PLCG1 Y775	17
AFAP1L2 Y413	CTNND1 Y334	17
TFRC Y20	SHC1 Y427	17
TNS3 S332 Y354	CAV1 Y14	17
RIN1 Y36	PRPF4B Y849	17
ENO1 Y44	PKP3 Y195	17
ENO1 Y44	CTNND1 Y334 Y321	17
CAV1 Y14	CBL Y552	17
PLCG1 Y783 Y775	AFAP1L2 Y413	16
EGFR Y998	AFAP1L2 Y413	16
EFNB1 Y343	ENO1 Y44	16
EFNB1 Y343	PTPRA Y798	16
FAM59A Y453	EPHB4 Y590 Y596	16
INSR Y1189	PIK3R1 Y607	16
AFAP1L2 Y413	PKP3 Y195	16
PHLPP1 Y1712	ENO1 Y44	16
PHLPP1 Y1712	PTPRA Y798	16
TFRC Y20	SHC1 Y349	16
TFRC Y20	PTPN18 Y389	16
ANXA2 Y30	ATA2 Y20	16
CAV1 Y14 Y6 Y25	EPHA2 Y588 Y594	16
ENO1 Y44	PLCG1 Y775	16
ENO1 Y44	CTNND1 Y334	16
CAV1 Y14	INPPL1 Y986 S1003	16
PLCG1 Y775	PTPRA Y798	16
CTNND1 Y334	PTPRA Y798	16
PLCG1 Y783 Y775	PTPRA Y798	15
EGFR Y998	ENO1 Y44	15
EGFR Y998	PTPRA Y798	15
ACP1 Y132	CAV1 Y14	15
EPHB1 Y594 Y600	FAM59A Y453	15
EPHB1 Y594 Y600	RIN1 Y36	15
FAM59A Y453	DKFZp761P0423 Y411	15
AFAP1L2 Y413	EGFR Y1069 Y1092	15
STAM Y381	EFNB2 Y304	15
STAM Y381	GPRC5A Y317	15
STAM Y381	ATA2 Y20	15
TFRC Y20	ARHGEF5 Y1097	15
TOM1L2 Y192 Y200	PXN Y118	15
ANXA2 Y30	PRPF4B Y849	15
SHC1 Y349 Y350	GPRC5A Y317	15
EGFR Y1092	PXN Y118	15
INPPL1 Y986 S1003	CDC2 Y15	15
CDC2 Y15	CBL Y552	15
PKP3 Y195	PTPRA Y798	15
TNK2 Y859	TFRC Y20	14
EPHB1 Y594 Y600	ANXA2 Y30	14
BCAR1 Y327	FAM59A Y453	14
EPHA1 Y781	EPS15 Y849	14
FAM59A Y453	EPHA2 Y772	14
AFAP1L2 Y413	TOM1L2 Y192 Y200	14
AFAP1L2 Y413	TNS3 S332 Y354	14
AFAP1L2 Y413	ARHGEF5 Y1097 Y1100	14
AFAP1L2 Y413	TNK2 Y859 Y860	14
AFAP1L2 Y413	ARHGEF5 Y1097	14
AFAP1L2 Y413	MAPK3 Y204	14
AFAP1L2 Y413	CTNND1 Y334 Y321	14
STAM2 Y374	ATA2 Y20	14
EGFR S1166 Y1172	PXN Y118	14
STAM Y381	ITGB4 Y1207	14
STAM Y381	GSK3B Y216	14
STAM Y381	PTPN11 Y62	14
TFRC Y20	PIK3R1 Y607	14
TFRC Y20	PKP3 Y84	14
TFRC Y20	MAPK3 Y204	14
TNS3 S332 Y354	PTPRA Y798	14
RIN1 Y36	EPHA2 Y588 Y594	14
ANXA2 Y30	GSK3B Y216	14
EGFR Y1069 Y1092	PTPRA Y798	14
EPHA2 Y588 Y594	EPS15 Y849	14
SHC1 Y349 Y350	PXN Y118	14
EPHA1 Y781	RIN1 Y36	13
FAM59A Y453	EFNB2 Y304	13
INSR Y1189	EGFR Y1172	13
INSR Y1189	RBCK1 Y330	13
INSR Y1189	CBL Y552	13
AFAP1L2 Y413	EGFR Y1092	13
STAM2 Y374	EFNB2 Y304	13
STAM2 Y374	GPRC5A Y317	13
EGFR S1166 Y1172	ENO1 Y44	13
STAM Y381	EPHA2 Y594	13
TFRC Y20	TNS3 S332 Y354	13
TFRC Y20	ARHGEF5 Y1097 Y1100	13
TFRC Y20	STAT3 Y705	13
TFRC Y20	STAT3 Y704	13
TOM1L2 Y192 Y200	ENO1 Y44	13
RIN1 Y36	GIT1 Y545	13
ANXA2 Y30	DKFZp761P0423 Y411	13
ARHGEF5 Y1097 Y1100	PTPRA Y798	13
ENO1 Y44	EGFR Y1092	13
TNK2 Y859 Y860	SKT Y393	13
CAV1 Y14	RBCK1 Y330	13
CAV1 Y14	AHCYL1 Y28	13
SHC1 Y349 Y350	PTPRA Y798	13
ARHGEF5 Y1097	GPRC5A Y317	13
ARHGEF5 Y1097	PTPRA Y798	13
AHCYL1 Y28	CDC2 Y15	13
MAPK3 Y204	PTPRA Y798	13
PRPF4B Y849	PTPN18 Y389	13
CTNND1 Y334 Y321	PTPRA Y798	13
ERBB2 Y1248	AFAP1L2 Y413	12
ERBB2 Y1248	TFRC Y20	12
EFNB1 Y343	TFRC Y20	12
EPHB1 Y594 Y600	AHCYL1 Y28	12
BCAR1 Y327	RIN1 Y36	12
EPHA1 Y781	RBCK1 Y330	12
MARVELD2 Y23	TFRC Y20	12
MARVELD2 Y23	PXN Y118	12
FAM59A Y453	ITGB4 Y1207	12
FAM59A Y453	PTPN11 Y62	12
EPHB4 Y590 Y596	STAM Y381	12
AFAP1L2 Y413	MAPK1 Y187	12
STAM2 Y374	ITGB4 Y1207	12
STAM2 Y374	GSK3B Y216	12
STAM2 Y374	PTPN11 Y62	12
STAM Y381	EPHA2 Y588 Y594	12
TFRC Y20	CTNND1 Y334	12
TFRC Y20	CTNND1 Y334 Y321	12
TOM1L2 Y192 Y200	PTPRA Y798	12
RIN1 Y36	EPHB1 Y600	12
RIN1 Y36	PLEKHA6 Y492	12
ANXA2 Y30	EPHB4 Y596	12
ANXA2 Y30	GPRC5A Y317	12
ANXA2 Y30	GIT1 Y545	12
CCDC50 Y145	EPHA2 Y588 Y594	12
TNS3 S776 Y780	PXN Y118	12
PIK3R1 Y607	CDC2 Y15	12
CAV1 Y14 Y6 Y25	FRK Y497	12
ENO1 Y44	SHC1 Y349 Y350	12
TNK2 Y859 Y860	PTPRA Y798	12
SHC1 Y349	GPRC5A Y317	12
SHC1 Y427	GPRC5A Y317	12
STAT3 Y705	CDC2 Y15	12
CDC2 Y15	STAT3 Y704	12
TNK2 Y859	CAV1 Y14	11
ERBB2 Y1248	PTPRA Y798	11
PLCG1 Y783 Y775	TFRC Y20	11
PLCG1 Y783 Y775	DKFZp761P0423 Y411	11
EGFR Y998	TFRC Y20	11
ACP1 Y132	INSR Y1189	11
ACP1 Y132	GPRC5A Y317	11
ACP1 Y132	CDC2 Y15	11
ACP1 Y132	GSK3B Y216	11
BCAR1 Y327	CAV1 Y14 Y6 Y25	11
MARVELD2 Y23	ENO1 Y44	11
MARVELD2 Y23	CDC2 Y15	11
MARVELD2 Y23	PTPRA Y798	11
INSR Y1189	TNS3 S332 Y354	11
INSR Y1189	INPPL1 Y986 S1003	11
INSR Y1189	AHCYL1 Y28	11
AFAP1L2 Y413	CCDC50 Y145	11
AFAP1L2 Y413	SHC1 Y349	11
AFAP1L2 Y413	EPS15 Y849	11
STAM2 Y374	EPHA2 Y594	11
EGFR S1166 Y1172	TFRC Y20	11
PHLPP1 Y1712	TFRC Y20	11
TFRC Y20	TOM1L2 Y192 Y200	11
TFRC Y20	EGFR Y1172	11
TFRC Y20	TNS3 S776 Y780	11
TFRC Y20	EGFR Y1069 Y1092	11
TFRC Y20	PLCG1 Y775	11
TFRC Y20	EGFR Y1092	11
TFRC Y20	INPPL1 Y986 S1003	11
TFRC Y20	PKP3 Y195	11
TFRC Y20	CBL Y552	11
RIN1 Y36	EPHB4 Y596	11
RIN1 Y36	PTK2 Y576	11
RIN1 Y36	ITGB4 Y1207	11
RIN1 Y36	PTPN11 Y62	11
ANXA2 Y30	PLEKHA6 Y492	11
ARHGEF5 Y1097 Y1100	GPRC5A Y317	11
TNS3 S776 Y780	ENO1 Y44	11
CAV1 Y14 Y6 Y25	DKFZp761P0423 Y411	11
CAV1 Y14 Y6 Y25	EPHA2 Y594	11
EPHA2 Y588 Y594	AHCYL1 Y28	11
SHC1 Y349 Y350	GSK3B Y216	11
SHC1 Y349 Y350	PRPF4B Y849	11
RBCK1 Y330	SKT Y393	11
GPRC5A Y317	AHCYL1 Y28	11
GPRC5A Y317	MAPK1 Y187	11
GPRC5A Y317	MAPK3 Y204	11
AHCYL1 Y28	SKT Y393	11
CDC2 Y15	PKP3 Y84	11
CBL Y552	PTPRA Y798	11
ERBB2 Y1248	CAV1 Y14	10
ACP1 Y132	PRPF4B Y849	10
EPHB1 Y594 Y600	TNS3 S332 Y354	10
EPHB1 Y594 Y600	CAV1 Y14 Y6 Y25	10
EPHA1 Y781	CCDC50 Y145	10
EPHA1 Y781	CAV1 Y14 Y6 Y25	10
MARVELD2 Y23	AFAP1L2 Y413	10
EPHB4 Y590 Y596	STAM2 Y374	10
AFAP1L2 Y413	EGFR S1166 Y1172	10
AFAP1L2 Y413	TNS3 S776 Y780	10
AFAP1L2 Y413	SHC1 Y427	10
AFAP1L2 Y413	PTPN18 Y389	10
STAM Y381	PTK2 Y576	10
EPHA2 Y772	CAV1 Y14 Y6 Y25	10
EGFR Y1172	CDC2 Y15	10
ANXA2 Y30	EPHB1 Y600	10
ARHGEF5 Y1097 Y1100	GSK3B Y216	10
CCDC50 Y145	PTPRA Y798	10
CAV1 Y14 Y6 Y25	BCAR1 Y249	10
DKFZp761P0423 Y411	EGFR Y1069 Y1092	10
[truncated: 927 more rows]

## Sheet: EGF4_coOcc_HeatmapGroups
Group 1 (BLUE)	Transition Group (RED)	Group 2 (GREEN)
ARHGEF5 Y1097	RBCK1 Y330	PXN Y118
MAPK3 Y204	STAM2 Y374	ENO1 Y44
ARHGEF5 Y1097 Y1100	STAM Y381	PTPRA Y798
MARVELD2 Y23	ANXA2 Y30	AFAP1L2 Y413
PIK3R1 Y607	ACP1 Y132	CDC2 Y15
EGFR Y1172	ATA2 Y20	INSR Y1189
INPPL1 Y986 S1003	PLEKHA5 Y128 Y134	CAV1 Y14
CBL Y552	CTTN Y446	SKT Y393
TNK2 Y859		TFRC Y20
PKP3 Y84		GPRC5A Y317
STAT3 Y705		GSK3B Y216
STAT3 Y704		PRPF4B Y849
PLCG1 Y775		DKFZp761P0423 Y411
EGFR Y998		EPHB1 Y594 Y600
PKP3 Y195		BCAR1 Y327
PHLPP1 Y1712		EPHA2 Y588 Y594
EFNB1 Y343		EPHA1 Y781
CTNND1 Y334		PTK2 Y576
CTNND1 Y334 Y321		EPHA2 Y594
ERBB2 Y1248		FRK Y497
EGFR S1166 Y1172		EPHA2 Y772
EGFR Y1092		EPHB4 Y590 Y596
TNS3 S776 Y780		EFNB2 Y304
TOM1L2 Y192 Y200		PTPN11 Y62
EGFR Y1069 Y1092		ITGB4 Y1207
PLCG1 Y783 Y775		EPHB1 Y600
TNS3 S332 Y354		PLEKHA6 Y492
AHCYL1 Y28		GIT1 Y545
RIN1 Y36		EPHB4 Y596
FAM59A Y453		BCAR1 Y249
CAV1 Y14 Y6 Y25
SHC1 Y349 Y350
MAPK1 Y187
PTPN18 Y389
SHC1 Y427
SHC1 Y349
CCDC50 Y145
TNK2 Y859 Y860
EPS15 Y849

## Sheet: HER2_DynamicGroups_RankOrdered
HER2_Full		352		HER2_5minTimePoints		352		HER2_P_EGF		641		HER2_P_HRG		_x001A_482		HER2_24H_EGF		363		HER2_24H_HRG		450
MAPK1 Y187	MAPK3 Y204	352		ATA2 Y20	ANXA2 Y30	348		INPPL1 Y986	EGFR Y1092	641		CTNND1 Y228	GRLF1 Y1105	468		INSR Y1189	INSR Y1185	363		STAT3 Y704	STAT3 Y705	444
STAT3 Y704	STAT3 Y705	351		BCAR1 Y234	BCAR1 Y387	346		PIK3R2 Y464	DSC3 Y818	636		STAT3 Y704	STAT3 Y705	460		INPPL1 Y986	EGFR Y1092	363		PXN Y118	MAPK3 Y204	426
INSR Y1189	INSR Y1185	349		FAM59A Y453	SHB Y268	342		SKT Y393	EPHB1 Y600	629		MAPK1 Y187	MAPK3 Y204	460		STAT3 Y704	STAT3 Y705	356		LDLR Y845	ANXA2 Y238	422
INPPL1 Y986	EGFR Y1092	346		BCAR1 Y327	BCAR1 Y234	340		AFAP1L2 Y413	DSC3 Y818	611		ENO1 Y44	GPRC5A Y347	434		CTNND1 Y228	SHC1 Y349	341		INSR Y1189	SH2D3A Y231 S218	421
BCAR1 Y234	BCAR1 Y249	338		BCAR1 Y327	BCAR1 Y387	338		SKT Y393	FYN Y420	611		GIT1 Y545	PXN Y118	431		RIN1 Y36	CAV1 Y14	329		BCAR1 Y327	BCAR1 Y387	421
BCAR1 Y234	BCAR1 Y387	335		INPPL1 Y986	EGFR Y1092	337		EPHB1 Y600	ERBB2IP Y1104	608		TFRC Y20	PTPN11 Y62	421		EGFR Y1172	INPPL1 Y986	328		GRLF1 Y1105	ALB Y164	411
EGFR Y1172	EGFR Y1092	334		ENO1 Y44	ACP1 Y132	337		PIK3R2 Y464	AFAP1L2 Y413	607		CRKL Y132	CDK2 Y15	419		EGFR Y1172	EGFR Y1092	328		SH2D3A Y231 S218	INSR Y1185	398
LDLR Y845	PTPN11 Y62	328		PIK3R2 Y464	ANXA2 Y238	336		ITGB4 Y1207	GRLF1 Y1105	606		FAM59A Y453	ANXA2 Y24	415		EFNB2 Y304	EPHB1 Y600	326		SGK223 Y413	MPZL1 Y263	395
EGFR Y1172	INPPL1 Y986	328		INSR Y1189	INSR Y1185	334		PXN S84 Y88	TFRC Y20	603		MAPK1 Y187	MAPK1 T185 Y187	413		BCAR1 Y327	BCAR3 Y266	321		INSR Y1189	INSR Y1185	389
BCAR1 Y387	BCAR1 Y249	328		CTNND1 Y228	SKT Y393	334		EGFR Y1172	SHC1 Y427	603		EFNB2 Y304	PTPRA Y798	408		FAM59A Y453	GPRC5A Y347	320		BCAR1 Y234	BCAR1 Y249	389
EGFR Y1197	EGFR Y1092	318		TNK2 Y859	CAV1 Y14	331		SKT Y393	ERBB2IP Y1104	601		MAPK1 T185 Y187	MAPK3 Y204	404		BCAR1 Y234	EPHA2 Y772	316		BCAR1 Y327	BCAR3 Y266	385
PRPF4B Y849	GSK3B Y216	313		LDLR Y845	MPZL1 Y263	330		EPHB1 Y600	FYN Y420	601		DSC3 Y818	PTPN11 Y62	402		BCAR1 Y234	BCAR1 Y387	312		ERBB2 Y1248	PTK2 Y576	382
EGFR Y1197	EGFR Y1172	312		BCAR1 Y327	BCAR1 Y249	329		MAPK1 Y187	MAPK3 Y204	599		EPHA2 Y588 Y594	EPHA2 Y588	385		EPHA2 Y772	BCAR1 Y387	303		BCAR1 Y327	BCAR1 Y249	382
EGFR Y1197	INPPL1 Y986	312		EFNB2 Y304	MAPK1 T185 Y187	329		TNK2 Y859	STAT3 Y705	593		CDK2 Y15	PTRF Y308	382		PXN Y118	ITGB4 Y1207	298		PXN S84 Y88	MAPK1 T185 Y187	377
ATA2 Y20	CAV1 Y14	307		PTPRA Y798	GPRC5A Y347	327		STAT3 Y704	TNK2 Y859	592		BCAR1 Y234	BCAR1 Y387	382		EFNB2 Y304	ACP1 Y132	296		BCAR3 Y266	BCAR1 Y387	376
BCAR3 Y266	BCAR1 Y249	305		BCAR1 Y387	BCAR1 Y249	325		EGFR Y1197	EGFR Y1172	588		SHC1 Y349 Y350	SHC1 Y349	377		ATA2 Y20	ANXA2 Y24	287		BCAR1 Y387	BCAR1 Y249	376
EPHA2 Y588	PTPN11 Y62	300		BCAR1 Y234	BCAR1 Y249	324		FYN Y420	ERBB2IP Y1104	576		SHC1 Y349 Y350	TNK2 Y859	365		EPHA2 Y588 Y594	ANXA2 Y238	282		BCAR1 Y327	BCAR1 Y234	370
BCAR3 Y266	BCAR1 Y387	300		EPHA2 Y588 Y594	LDLR Y845	319		ENO1 Y44	ANXA2 Y238	570		TFRC Y20	PTRF Y308	363		MAPK1 Y187	MAPK3 Y204	281		BCAR1 Y234	BCAR1 Y387	370
TNK2 Y859	CAV1 Y14	299		PTRF Y308	EPHA2 Y588	318		STAT3 Y704	STAT3 Y705	569		TFRC Y20	DSC3 Y818	361		DSC3 Y818	CAV1 Y14	279		PIK3R2 Y464	FYN Y420	368
EPHA2 Y588	LDLR Y845	299		STAT3 Y704	STAT3 Y705	317		SHC1 Y427	SHC1 Y349	568		PTPRA Y798	EPHA2 Y588	359		DYRK1A Y321	PTK2 Y576	278		CRKL Y132	EFNB2 Y304	362
BCAR1 Y234	BCAR3 Y266	299		GIT1 Y545	AFAP1L2 Y413	317		SH2D3A Y231 S218	AFAP1L2 Y413	566		EGFR Y1172	TNK2 Y859	359		CDK2 Y15	DYRK1A Y321	277		PRPF4B Y849	EPHA2 Y588 Y594	360
CDK2 Y15	PRPF4B Y849	297		FAM59A Y453	RIN1 Y36	312		EGFR Y1197	SHC1 Y427	566		TFRC Y20	LDLR Y845	358		EPHB1 Y600	EPHA2 Y588	277		BCAR3 Y266	BCAR1 Y249	356
CDK2 Y15	GSK3B Y216	287		RIN1 Y36	SHB Y268	311		CRKL Y132	GPRC5A Y347	563		PIK3R2 Y464	ANXA2 Y238	357		SKT Y393	ANXA2 Y238	276		PIK3R2 Y464	EPHB1 Y600	352
ANXA2 Y24	PKP3 Y176	286		EGFR Y1172	EGFR Y1092	311		ANXA2 Y24	PTRF Y308	555		PTRF Y308	LDLR Y845	357		SHC1 Y349 Y350	CTNND1 Y228	275		ATA2 Y20	SHC1 Y349	349
SHC1 Y349 Y350	SHC1 Y349	285		EPHA2 Y588 Y594	MPZL1 Y263	309		INSR Y1185	GPRC5A Y347	554		BCAR3 Y266	FYN Y420	354		EFNB2 Y304	SKT Y393	273		EFNB2 Y304	FAM59A Y453	344
BCAR1 Y327	BCAR1 Y387	282		EGFR Y1172	INPPL1 Y986	306		CRKL Y132	PTRF Y308	550		EPHA2 Y772	GRLF1 Y1105	350		PXN S84 Y88	ACP1 Y132	271		PXN Y118	INSR Y1185	341
ATA2 Y20	ANXA2 Y24	282		MAPK3 Y204	PTK2 Y397	306		PTRF Y308	GPRC5A Y347	550		PTPRA Y798	EPHA2 Y588 Y594	349		SKT Y393	EPHB1 Y600	270		SH2D3A Y231 S218	MAPK3 Y204	331
BCAR1 Y327	BCAR1 Y234	280		PTPRA Y798	MAPK3 Y204	305		PIK3R2 Y464	SH2D3A Y231 S218	549		PIK3R2 Y464	ITGB4 Y1207	348		EPHB1 Y600	ACP1 Y132	267		ITGB4 Y1207	PTPN11 Y62	331
LDLR Y845	ANXA2 Y238	278		TFRC Y20	SHB Y268	303		SH2D3A Y231 S218	DSC3 Y818	548		EFNB2 Y304	EPHA2 Y588 Y594	348		EGFR Y1197	TNK2 Y859	266		SHC1 Y427	SHC1 Y349	330
EFNB2 Y304	EPHB1 Y600	278		PTPRA Y798	PTK2 Y397	303		EGFR Y1172	SHC1 Y349	547		ITGB4 Y1207	ANXA2 Y238	348		EPHB1 Y600	ANXA2 Y238	264		ANXA2 Y24	ERBB2IP Y1104	329
AFAP1L2 Y413	SGK223 Y413	278		ITGB4 Y1207	GSK3B Y216	302		PXN S84 Y88	ACP1 Y132	544		ITGB4 Y1207	GSK3B Y216	345		TFRC Y20	EFNB2 Y304	263		EFNB2 Y304	SGK223 Y413	327
PTPN11 Y62	ANXA2 Y238	276		ATA2 Y20	PKP3 Y176	299		ANXA2 Y24	GPRC5A Y347	531		DYRK1A Y321	EPHA2 Y588	345		SHC1 Y349 Y350	MAPK1 T185 Y187	263		INSR Y1185	MAPK3 Y204	327
RIN1 Y36	ANXA2 Y24	274		MAPK3 Y204	GPRC5A Y347	299		EGFR Y1197	SHC1 Y349	524		EPHA2 Y588 Y594	DYRK1A Y321	343		ATA2 Y20	PKP3 Y176	262		INSR Y1189	MAPK3 Y204	323
PTRF Y308	MPZL1 Y263	274		MAPK1 Y187	MAPK3 Y204	298		SH2D3A Y231 S218	PTK2 Y397	521		PIK3R2 Y464	GSK3B Y216	340		SHC1 Y349 Y350	SHC1 Y349	261		BCAR1 Y234	BCAR3 Y266	318
EPHA2 Y575	EPHA2 Y588 Y594	273		BCAR3 Y266	BCAR1 Y249	298		CRKL Y132	CAV1 Y14	517		CTNND1 Y228	EPHA2 Y772	339		EPHA2 Y772	DYRK1A Y321	261		SH2D3A Y231 S218	PXN Y118	317
ATA2 Y20	TNK2 Y859	273		ANXA2 Y30	PKP3 Y176	298		INSR Y1189	MPZL1 Y263	512		LDLR Y845	ACP1 Y132	339		EGFR Y1197	INPPL1 Y986	260		GIT1 Y545	EPHB1 Y600	316
DSC3 Y818	PKP3 Y176	272		TFRC Y20	FAM59A Y453	297		TFRC Y20	ACP1 Y132	509		PTRF Y308	ACP1 Y132	336		EGFR Y1197	EGFR Y1092	260		ANXA2 Y30	CAV1 Y14	314
BCAR1 Y327	BCAR1 Y249	272		TFRC Y20	RIN1 Y36	297		CRKL Y132	INSR Y1185	509		CRKL Y132	PTRF Y308	334		EPHA2 Y588 Y594	EPHA2 Y588	257		ERBB2 Y1248	GIT1 Y545	309
DSC3 Y818	CAV1 Y14	271		EPHA2 Y772	PRPF4B Y849	297		BCAR1 Y234	ERBB2IP Y1104	508		GSK3B Y216	ANXA2 Y238	332		EPHA2 Y588	ANXA2 Y238	257		PRPF4B Y849	GSK3B Y216	306
EPHA2 Y588 Y594	ANXA2 Y238	270		ANXA2 Y24	PKP3 Y176	296		DYRK1A Y321	SHB Y268	508		EPHA2 Y588	PKP3 Y176	331		CDK2 Y15	EPHA2 Y772	256		ENO1 Y44	PTRF Y308	305
ATA2 Y20	PKP3 Y176	268		EPHA2 Y588 Y594	PTPN11 Y62	294		PXN Y118	ENO1 Y44	497		TFRC Y20	ACP1 Y132	329		TFRC Y20	ANXA2 Y238	255		INSR Y1189	PXN Y118	302
EFNB2 Y304	SKT Y393	267		MAPK1 Y187	PTK2 Y397	291		EPHA2 Y588	SHB Y268	497		SHC1 Y349 Y350	EGFR Y1172	328		BCAR1 Y234	BCAR1 Y249	254		CRKL Y132	FAM59A Y453	302
ATA2 Y20	DSC3 Y818	264		ATA2 Y20	ANXA2 Y24	289		BCAR1 Y234	EPHB1 Y600	496		LDLR Y845	PTPN11 Y62	328		ITGB4 Y1207	PRPF4B Y849	254		ATA2 Y20	SHC1 Y427	297
EPHA2 Y588 Y594	PTPN11 Y62	261		ANXA2 Y24	ANXA2 Y30	286		CDK2 Y15	PTPN11 Y62	490		BCAR1 Y327	BCAR1 Y234	326		EFNB2 Y304	EPHA2 Y588	252		ATA2 Y20	CRKL Y132	289
BCAR1 Y327	BCAR3 Y266	261		ANXA2 Y24	GRLF1 Y1105	286		BCAR1 Y234	SKT Y393	490		PTPRA Y798	ITGB4 Y1207	326		PRPF4B Y849	GSK3B Y216	252		EPHB1 Y600	ACP1 Y132	286
EPHA2 Y588 Y594	EPHA2 Y588	259		INSR Y1189	EPHB1 Y600	285		CTNND1 Y228	MAPK1 T185 Y187	488		INSR Y1189	INSR Y1185	325		EGFR Y1197	EGFR Y1172	249		EFNB2 Y304	MPZL1 Y263	284
EPHA2 Y588 Y594	LDLR Y845	255		BCAR1 Y327	BCAR3 Y266	285		INSR Y1185	PKP3 Y176	487		PTPRA Y798	DYRK1A Y321	324		ANXA2 Y24	TNK2 Y859	249		TFRC Y20	CRKL Y132	283
EPHA2 Y588	SHB Y268	254		SHC1 Y427	CAV1 Y14	285		EPHA2 Y575	BCAR1 Y249	480		PTRF Y308	PTPN11 Y62	324		SKT Y393	EPHA2 Y588	249		EPHB1 Y600	FYN Y420	281
ATA2 Y20	RIN1 Y36	254		SHC1 Y349 Y350	TNK2 Y859	283		ANXA2 Y24	INSR Y1185	480		INPPL1 Y986	GPRC5A Y347	320		TFRC Y20	EPHB1 Y600	248		PTRF Y308	MPZL1 Y263	281
PXN S84 Y88	ACP1 Y132	252		SHC1 Y349 Y350	SHC1 Y427	281		INSR Y1189	PKP3 Y176	477		ITGB4 Y1207	DYRK1A Y321	320		EFNB2 Y304	ANXA2 Y238	248		CDK2 Y15	GSK3B Y216	280
SH2D3A Y231 S218	MAPK1 Y187	251		BCAR1 Y234	BCAR3 Y266	279		CRKL Y132	ANXA2 Y24	476		DSC3 Y818	PTRF Y308	320		SH2D3A Y231 S218	FAM59A Y453	248		CDK2 Y15	ITGB4 Y1207	279
SH2D3A Y231 S218	MAPK3 Y204	251		GPRC5A Y347	PTK2 Y397	279		PTPRA Y798	PXN Y118	476		EGFR Y1197	EGFR Y1172	319		RIN1 Y36	DSC3 Y818	247		MAPK1 Y187	MAPK14 Y182	279
EPHA2 Y588	ANXA2 Y238	251		SHC1 Y349 Y350	CAV1 Y14	277		MAPK1 Y187	SHC1 Y349	475		DSC3 Y818	LDLR Y845	317		INPPL1 Y986	TNK2 Y859	247		ANXA2 Y30	PKP3 Y176	278
RIN1 Y36	PKP3 Y176	246		BCAR3 Y266	BCAR1 Y387	277		INSR Y1185	PTRF Y308	474		BCAR1 Y387	BCAR1 Y249	315		TNK2 Y859	EGFR Y1092	247		CDK2 Y15	LDLR Y845	274
ANXA2 Y24	DSC3 Y818	245		STAT3 Y704	SHC1 Y427	276		PTPRA Y798	ENO1 Y44	473		PIK3R2 Y464	LDLR Y845	312		EGFR Y1172	TNK2 Y859	246		CRKL Y132	SGK223 Y413	273
FAM59A Y453	RIN1 Y36	244		EPHA2 Y772	ACP1 Y132	275		AFAP1L2 Y413	PTK2 Y397	472		CRKL Y132	ANXA2 Y24	312		EPHA2 Y772	BCAR1 Y249	244		SHC1 Y349 Y350	ACP1 Y132	273
SHC1 Y427	TNK2 Y859	243		SHC1 Y427	TNK2 Y859	273		CAV1 Y14	GPRC5A Y347	470		FAM59A Y453	SHC1 Y349	312		SHC1 Y349	MAPK3 Y204	244		FAM59A Y453	MAPK14 Y182	273
TNK2 Y859	EGFR Y1092	242		INSR Y1185	EPHB1 Y600	269		BCAR1 Y234	FYN Y420	467		DSC3 Y818	ACP1 Y132	310		PTPRA Y798	ITGB4 Y1207	239		EPHA2 Y575	EPHA2 Y772	269
SHC1 Y349 Y350	ANXA2 Y30	242		EPHA2 Y772	ENO1 Y44	268		FAM59A Y453	PTK2 Y576	467		SHC1 Y349 Y350	EGFR Y1197	308		CDK2 Y15	BCAR1 Y387	238		TFRC Y20	ENO1 Y44	268
INPPL1 Y986	TNK2 Y859	242		DSC3 Y818	GRLF1 Y1105	268		ERBB2 Y1248	DSC3 Y818	463		ACP1 Y132	PTPN11 Y62	308		CDK2 Y15	PTK2 Y576	237		EPHA2 Y588	SHB Y268	268
EGFR Y1172	TNK2 Y859	241		ANXA2 Y24	ERBB2IP Y1104	267		EFNB2 Y304	BCAR1 Y387	463		DSC3 Y818	PRPF4B Y849	307		PXN S84 Y88	EFNB2 Y304	236		PIK3R2 Y464	GIT1 Y545	267
SHC1 Y427	CAV1 Y14	239		PKP3 Y176	ERBB2IP Y1104	267		BCAR1 Y234	BCAR3 Y266	463		SHC1 Y349 Y350	ANXA2 Y24	306		CTNND1 Y228	MAPK3 Y204	234		SH2D3A Y231 S218	RIN1 Y36	267
RIN1 Y36	DSC3 Y818	239		STAT3 Y704	SHC1 Y349 Y350	264		ERBB2 Y1248	PIK3R2 Y464	462		AFAP1L2 Y413	GSK3B Y216	304		BCAR1 Y387	BCAR1 Y249	234		ENO1 Y44	DSC3 Y818	266
ANXA2 Y24	CAV1 Y14	239		LDLR Y845	PTPN11 Y62	264		INSR Y1185	MPZL1 Y263	462		EFNB2 Y304	EPHA2 Y588	303		CDK2 Y15	BCAR1 Y234	230		INSR Y1189	RIN1 Y36	264
ATA2 Y20	SHC1 Y427	238		ENO1 Y44	MAPK14 Y182	262		INSR Y1189	PTK2 Y576	461		PIK3R2 Y464	BCAR3 Y266	301		SHC1 Y427	TNK2 Y859	229		ANXA2 Y24	ANXA2 Y30	264
SKT Y393	ERBB2IP Y1104	236		PTRF Y308	PTPN11 Y62	262		ATA2 Y20	PTK2 Y397	460		ERBB2 Y1248	RIN1 Y36	298		ATA2 Y20	CAV1 Y14	228		DYRK1A Y321	ALB Y164	264
SHC1 Y349 Y350	SHC1 Y427	235		EGFR Y1197	EGFR Y1092	258		INSR Y1189	INSR Y1185	459		EFNB2 Y304	DYRK1A Y321	296		PIK3R2 Y464	SH2D3A Y231 S218	227		ATA2 Y20	SHC1 Y349 Y350	263
EPHA2 Y575	ANXA2 Y238	233		PTPRA Y798	MAPK1 Y187	256		DSC3 Y818	PTK2 Y397	456		CRKL Y132	MPZL1 Y263	293		CTNND1 Y228	MAPK1 T185 Y187	227		GIT1 Y545	PTK2 Y576	262
SHC1 Y427	SHC1 Y349	231		MAPK14 Y182	ACP1 Y132	254		PIK3R2 Y464	PTK2 Y397	455		PIK3R2 Y464	PRPF4B Y849	291		PTPRA Y798	SHB Y268	227		CTNND1 Y228	ERBB2IP Y1104	262
SHB Y268	PTPN11 Y62	231		MPZL1 Y263	PTPN11 Y62	254		PXN Y118	ANXA2 Y238	455		ERBB2 Y1248	ANXA2 Y24	285		ATA2 Y20	RIN1 Y36	226		CDK2 Y15	ANXA2 Y238	261
FAM59A Y453	MPZL1 Y263	231		PIK3R2 Y464	SH2D3A Y231 S218	253		CTNND1 Y228	PTK2 Y576	453		INPPL1 Y986	ENO1 Y44	283		INSR Y1189	GRLF1 Y1105	226		PTPRA Y798	ENO1 Y44	261
ATA2 Y20	ANXA2 Y30	231		SH2D3A Y231 S218	ANXA2 Y238	253		SHC1 Y349	MAPK3 Y204	453		TNK2 Y859	SHC1 Y349	282		EPHA2 Y772	PTK2 Y576	226		MAPK1 Y187	MAPK3 Y204	260
LDLR Y845	SHB Y268	230		RIN1 Y36	GRLF1 Y1105	252		ERBB2 Y1248	CAV1 Y14	451		SGK223 Y413	PRPF4B Y849	282		GRLF1 Y1105	INSR Y1185	226		FAM59A Y453	ANXA2 Y24	257
CAV1 Y14	PKP3 Y176	229		SHC1 Y427	STAT3 Y705	252		GPRC5A Y347	PKP3 Y176	449		EFNB2 Y304	ITGB4 Y1207	281		PTRF Y308	MPZL1 Y263	226		PTPRA Y798	PTRF Y308	256
TNK2 Y859	DSC3 Y818	228		PXN S84 Y88	MAPK14 Y182	251		ERBB2 Y1248	AFAP1L2 Y413	448		CDK2 Y15	ENO1 Y44	279		TFRC Y20	EPHA2 Y588	225		GSK3B Y216	ACP1 Y132	256
RIN1 Y36	SHC1 Y349	228		EGFR Y1197	INPPL1 Y986	248		EPHA2 Y772	EPHB1 Y600	448		EGFR Y1197	SHC1 Y349	279		PXN S84 Y88	TFRC Y20	224		INSR Y1189	PTRF Y308	255
SKT Y393	EPHB1 Y600	226		ATA2 Y20	STAT3 Y705	247		CAV1 Y14	INSR Y1185	443		PRPF4B Y849	ANXA2 Y238	279		PXN S84 Y88	EPHB1 Y600	223		CDK2 Y15	PTPN11 Y62	254
ENO1 Y44	PTRF Y308	226		CTNND1 Y228	SHC1 Y349	247		CAV1 Y14	PTRF Y308	443		EFNB2 Y304	EPHB1 Y600	277		TFRC Y20	EPHA2 Y588 Y594	223		EFNB2 Y304	MAPK14 Y182	250
SHC1 Y349 Y350	RIN1 Y36	225		MAPK1 Y187	GPRC5A Y347	247		EPHA2 Y772	SKT Y393	438		CDK2 Y15	LDLR Y845	277		ITGB4 Y1207	GSK3B Y216	223		FAM59A Y453	SHC1 Y349	250
RIN1 Y36	SHC1 Y427	223		EGFR Y1197	EGFR Y1172	244		EPHA2 Y772	ERBB2IP Y1104	435		CDK2 Y15	PTPN11 Y62	277		SKT Y393	EPHA2 Y588 Y594	223		PTPRA Y798	DSC3 Y818	249
EGFR Y1197	TNK2 Y859	223		SHC1 Y427	ANXA2 Y30	244		CAV1 Y14	PTK2 Y397	434		INPPL1 Y986	TNK2 Y859	277		SH2D3A Y231 S218	GPRC5A Y347	222		PRPF4B Y849	PTPN11 Y62	249
DYRK1A Y321	ALB Y164	223		ANXA2 Y30	CAV1 Y14	243		BCAR1 Y234	BCAR1 Y249	433		ITGB4 Y1207	PRPF4B Y849	276		SKT Y393	PTK2 Y397	222		ATA2 Y20	EFNB2 Y304	248
RIN1 Y36	CAV1 Y14	222		ANXA2 Y30	STAT3 Y705	243		PTPRA Y798	ANXA2 Y238	433		SH2D3A Y231 S218	RIN1 Y36	274		AFAP1L2 Y413	SGK223 Y413	221		ATA2 Y20	DSC3 Y818	248
ERBB2IP Y1104	ANXA2 Y238	222		GRLF1 Y1105	PKP3 Y176	243		PKP3 Y176	PTK2 Y397	431		AFAP1L2 Y413	BCAR1 Y387	274		TFRC Y20	ACP1 Y132	219		FAM59A Y453	SGK223 Y413	248
EFNB2 Y304	ERBB2IP Y1104	221		ATA2 Y20	SHC1 Y427	242		EPHA2 Y575	EPHA2 Y588 Y594	421		TFRC Y20	CDK2 Y15	271		BCAR1 Y234	DYRK1A Y321	218		EGFR Y1197	INPPL1 Y986	247
ATA2 Y20	SHC1 Y349 Y350	221		ENO1 Y44	PRPF4B Y849	242		MAPK1 T185 Y187	PTK2 Y576	421		SHC1 Y349 Y350	FAM59A Y453	271		RIN1 Y36	PKP3 Y176	217		CRKL Y132	MPZL1 Y263	245
EPHA2 Y575	PTPN11 Y62	219		EPHA2 Y575	EPHA2 Y588	240		LDLR Y845	SHB Y268	420		ANXA2 Y24	SHC1 Y349	271		ANXA2 Y24	PKP3 Y176	217		ANXA2 Y30	SHC1 Y349	245
SH2D3A Y231 S218	GPRC5A Y347	217		ITGB4 Y1207	PRPF4B Y849	240		CRKL Y132	PKP3 Y176	419		EPHA2 Y588 Y594	ERBB2IP Y1104	269		INSR Y1189	MPZL1 Y263	216		SGK223 Y413	PTRF Y308	245
FAM59A Y453	ANXA2 Y24	217		EPHA2 Y588	PTPN11 Y62	240		SHC1 Y349 Y350	MAPK1 T185 Y187	419		EGFR Y1197	MPZL1 Y263	268		INSR Y1185	MPZL1 Y263	216		GSK3B Y216	ANXA2 Y238	245
EPHA2 Y772	EPHA2 Y588	217		ATA2 Y20	CAV1 Y14	239		AFAP1L2 Y413	CAV1 Y14	419		EPHA2 Y588 Y594	PKP3 Y176	268		BCAR1 Y387	DYRK1A Y321	214		GSK3B Y216	LDLR Y845	244
INPPL1 Y986	CAV1 Y14	215		PRPF4B Y849	ACP1 Y132	239		ATA2 Y20	INSR Y1189	418		CDK2 Y15	GPRC5A Y347	267		AFAP1L2 Y413	GSK3B Y216	213		EPHA2 Y588 Y594	GSK3B Y216	243
FAM59A Y453	SHC1 Y349	215		ATA2 Y20	STAT3 Y704	238		ANXA2 Y24	CAV1 Y14	417		PTPRA Y798	EPHB1 Y600	266		ENO1 Y44	PRPF4B Y849	213		PKP3 Y176	ERBB2IP Y1104	241
EGFR Y1172	CAV1 Y14	215		SKT Y393	SHC1 Y349	238		EPHA2 Y772	FYN Y420	417		ITGB4 Y1207	EPHA2 Y588	266		SKT Y393	ACP1 Y132	213		CTNND1 Y228	PKP3 Y176	240
CAV1 Y14	EGFR Y1092	215		ITGB4 Y1207	MAPK14 Y182	237		BCAR1 Y234	EPHA2 Y772	416		BCAR1 Y387	GPRC5A Y347	266		MAPK1 T185 Y187	SHC1 Y349	212		AFAP1L2 Y413	ENO1 Y44	240
EPHA2 Y772	SHB Y268	214		RIN1 Y36	DSC3 Y818	235		EPHA2 Y588	LDLR Y845	416		CRKL Y132	FAM59A Y453	265		EPHA2 Y588 Y594	EPHB1 Y600	212		SKT Y393	EPHA2 Y588	240
ANXA2 Y30	CAV1 Y14	214		ENO1 Y44	ITGB4 Y1207	235		ITGB4 Y1207	BCAR1 Y387	415		CDK2 Y15	ANXA2 Y24	265		TFRC Y20	SKT Y393	211		TFRC Y20	EFNB2 Y304	239
ANXA2 Y24	SHC1 Y427	214		DSC3 Y818	SKT Y393	235		ATA2 Y20	FAM59A Y453	414		CDK2 Y15	ACP1 Y132	265		SH2D3A Y231 S218	PKP3 Y176	211		PXN Y118	MAPK1 Y187	239
ANXA2 Y24	TNK2 Y859	213		STAT3 Y704	ANXA2 Y30	234		MAPK1 Y187	SHC1 Y427	410		AFAP1L2 Y413	GPRC5A Y347	265		AFAP1L2 Y413	ENO1 Y44	211		INSR Y1185	PTRF Y308	239
SHC1 Y349 Y350	FAM59A Y453	210		SHC1 Y349 Y350	STAT3 Y705	234		BCAR1 Y387	GRLF1 Y1105	409		EGFR Y1197	TNK2 Y859	264		CRKL Y132	SHB Y268	210		SH2D3A Y231 S218	PTRF Y308	237
PXN S84 Y88	CTNND1 Y228	210		ANXA2 Y24	STAT3 Y705	234		DSC3 Y818	CAV1 Y14	408		PRPF4B Y849	GSK3B Y216	264		ANXA2 Y24	SHC1 Y427	210		ACP1 Y132	MPZL1 Y263	237
CRKL Y132	CTNND1 Y228	210		EPHA2 Y575	GPRC5A Y347	233		PIK3R2 Y464	CAV1 Y14	404		ATA2 Y20	PTRF Y308	263		EGFR Y1197	ANXA2 Y24	209		PTK2 Y397	PTK2 Y576	237
STAT3 Y704	TNK2 Y859	209		ATA2 Y20	GRLF1 Y1105	232		STAT3 Y704	INPPL1 Y986	403		EFNB2 Y304	ERBB2IP Y1104	263		SGK223 Y413	GSK3B Y216	209		DSC3 Y818	SHC1 Y349	236
EPHA2 Y575	LDLR Y845	209		ANXA2 Y30	GRLF1 Y1105	230		STAT3 Y704	EGFR Y1092	403		PTPRA Y798	PKP3 Y176	262		EPHA2 Y588	PTPN11 Y62	209		GPRC5A Y347	PTPN11 Y62	236
ANXA2 Y30	SHC1 Y349	209		ATA2 Y20	ERBB2IP Y1104	229		ERBB2 Y1248	SH2D3A Y231 S218	403		ACP1 Y132	EGFR Y1092	262		PXN S84 Y88	EPHA2 Y588	208		EGFR Y1172	SHC1 Y349	234
TNK2 Y859	STAT3 Y705	208		CDK2 Y15	MAPK1 Y187	227		GSK3B Y216	PTPN11 Y62	402		BCAR3 Y266	LDLR Y845	261		ANXA2 Y24	MPZL1 Y263	207		MAPK3 Y204	PTRF Y308	233
TFRC Y20	ACP1 Y132	208		ANXA2 Y30	ERBB2IP Y1104	227		MPZL1 Y263	PTK2 Y576	401		DYRK1A Y321	ERBB2IP Y1104	261		MAPK1 T185 Y187	GPRC5A Y347	207		ATA2 Y20	TNK2 Y859	232
SHC1 Y349 Y350	ANXA2 Y24	208		FAM59A Y453	GRLF1 Y1105	225		GPRC5A Y347	MPZL1 Y263	399		CDK2 Y15	DSC3 Y818	260		PIK3R2 Y464	GPRC5A Y347	206		PXN S84 Y88	TFRC Y20	232
EGFR Y1197	CAV1 Y14	208		ANXA2 Y30	TNK2 Y859	225		EFNB2 Y304	ITGB4 Y1207	398		ATA2 Y20	BCAR1 Y327	259		SHC1 Y349 Y350	ANXA2 Y30	206		GIT1 Y545	ACP1 Y132	232
EPHA2 Y575	EPHA2 Y588	206		ITGB4 Y1207	ACP1 Y132	225		ANXA2 Y24	PKP3 Y176	396		INPPL1 Y986	BCAR1 Y387	259		MAPK1 T185 Y187	LDLR Y845	206		RIN1 Y36	INSR Y1185	232
CAV1 Y14	SHC1 Y349	206		EPHA2 Y575	PTRF Y308	224		SGK223 Y413	ANXA2 Y238	393		ATA2 Y20	ERBB2 Y1248	258		ACP1 Y132	ANXA2 Y238	206		ATA2 Y20	SGK223 Y413	231
FAM59A Y453	MAPK1 T185 Y187	205		CTNND1 Y228	DSC3 Y818	224		EFNB2 Y304	BCAR3 Y266	391		CDK2 Y15	MPZL1 Y263	258		GIT1 Y545	PXN Y118	205		ATA2 Y20	MPZL1 Y263	231
TFRC Y20	ANXA2 Y238	204		BCAR3 Y266	PTK2 Y576	224		RIN1 Y36	SHC1 Y349	391		ANXA2 Y24	EGFR Y1172	258		AFAP1L2 Y413	PRPF4B Y849	204		TNK2 Y859	CAV1 Y14	231
SHC1 Y427	EGFR Y1092	204		DSC3 Y818	PKP3 Y176	223		SH2D3A Y231 S218	CAV1 Y14	390		ITGB4 Y1207	EPHA2 Y588 Y594	257		PTK2 Y397	PTPN11 Y62	204		EPHA2 Y588 Y594	GPRC5A Y347	231
ATA2 Y20	SHC1 Y349	204		GRLF1 Y1105	SHB Y268	222		RIN1 Y36	SHC1 Y427	390		ENO1 Y44	PTRF Y308	255		PIK3R2 Y464	FAM59A Y453	202		EFNB2 Y304	SHC1 Y349	230
SHC1 Y427	INPPL1 Y986	203		GRLF1 Y1105	ERBB2IP Y1104	222		CAV1 Y14	PKP3 Y176	390		BCAR1 Y327	BCAR3 Y266	253		CRKL Y132	GIT1 Y545	202		PTPRA Y798	INSR Y1185	230
SHC1 Y349 Y350	CAV1 Y14	203		ATA2 Y20	TNK2 Y859	221		INSR Y1189	GPRC5A Y347	389		EPHA2 Y772	ERBB2IP Y1104	253		BCAR1 Y234	PTK2 Y576	202		AFAP1L2 Y413	GPRC5A Y347	230
EGFR Y1172	SHC1 Y427	203		DYRK1A Y321	ALB Y164	221		RIN1 Y36	EGFR Y1172	388		CRKL Y132	SHC1 Y349 Y350	252		PXN Y118	PRPF4B Y849	202		GRLF1 Y1105	DYRK1A Y321	228
CTNND1 Y228	MAPK1 T185 Y187	203		ENO1 Y44	GSK3B Y216	220		MAPK1 Y187	EGFR Y1172	388		BCAR1 Y234	GPRC5A Y347	252		TNK2 Y859	CAV1 Y14	202		SHC1 Y349 Y350	EGFR Y1197	227
ANXA2 Y24	ANXA2 Y30	203		FAM59A Y453	STAT3 Y705	219		PRPF4B Y849	GSK3B Y216	388		BCAR1 Y327	BCAR1 Y387	251		CAV1 Y14	PKP3 Y176	202		EPHA2 Y772	SKT Y393	227
TFRC Y20	ERBB2IP Y1104	202		STAT3 Y705	PKP3 Y176	219		PKP3 Y176	MPZL1 Y263	388		BCAR1 Y234	BCAR1 Y249	251		MAPK1 Y187	SHC1 Y427	201		FAM59A Y453	EGFR Y1172	226
TNK2 Y859	PKP3 Y176	201		STAT3 Y704	FAM59A Y453	216		ATA2 Y20	PTK2 Y576	387		AFAP1L2 Y413	INPPL1 Y986	251		SHC1 Y427	INPPL1 Y986	201		DSC3 Y818	PTRF Y308	226
ANXA2 Y30	TNK2 Y859	200		STAT3 Y704	SHB Y268	216		EFNB2 Y304	GRLF1 Y1105	387		AFAP1L2 Y413	ENO1 Y44	250		SHC1 Y427	EGFR Y1092	201		TFRC Y20	AFAP1L2 Y413	225
PIK3R2 Y464	PTPRA Y798	198		ANXA2 Y24	DSC3 Y818	216		AFAP1L2 Y413	ENO1 Y44	387		ERBB2 Y1248	FAM59A Y453	249		MAPK3 Y204	GPRC5A Y347	201		SHC1 Y427	MAPK14 Y182	225
MAPK14 Y182	MAPK3 Y204	198		EPHA2 Y772	ITGB4 Y1207	216		ERBB2 Y1248	CRKL Y132	386		CRKL Y132	ENO1 Y44	249		FAM59A Y453	MAPK1 Y187	200		BCAR3 Y266	PTK2 Y397	224
MAPK1 Y187	MAPK14 Y182	198		PRPF4B Y849	GSK3B Y216	215		ERBB2 Y1248	PTK2 Y397	386		EPHA2 Y588	ERBB2IP Y1104	249		BCAR1 Y387	PTK2 Y576	200		SGK223 Y413	SHC1 Y349	224
EGFR Y1197	SHC1 Y427	198		EPHA2 Y588 Y594	PTRF Y308	215		SHC1 Y427	MAPK3 Y204	386		SH2D3A Y231 S218	MAPK1 T185 Y187	248		EFNB2 Y304	EPHA2 Y588 Y594	199		SHC1 Y349	MPZL1 Y263	224
TFRC Y20	SKT Y393	197		SH2D3A Y231 S218	INSR Y1185	214		MAPK1 Y187	INPPL1 Y986	385		PTRF Y308	GPRC5A Y347	248		MAPK1 Y187	TNK2 Y859	199		GSK3B Y216	MPZL1 Y263	224
SHC1 Y427	PKP3 Y176	197		RIN1 Y36	SKT Y393	214		MAPK1 Y187	EGFR Y1092	385		INSR Y1185	PTK2 Y576	247		EPHA2 Y588	ACP1 Y132	199		EFNB2 Y304	ENO1 Y44	222
EPHB1 Y600	DYRK1A Y321	197		INPPL1 Y986	TNK2 Y859	214		RIN1 Y36	MAPK1 Y187	384		CRKL Y132	GPRC5A Y347	246		CRKL Y132	PXN Y118	198		CDK2 Y15	PRPF4B Y849	222
EFNB2 Y304	DYRK1A Y321	197		STAT3 Y705	SHB Y268	214		CDK2 Y15	GSK3B Y216	383		ITGB4 Y1207	SGK223 Y413	245		EGFR Y1172	SHC1 Y427	198		ITGB4 Y1207	MPZL1 Y263	222
SHC1 Y427	ANXA2 Y30	196		STAT3 Y704	ANXA2 Y24	213		PRPF4B Y849	PTPN11 Y62	383		SGK223 Y413	DYRK1A Y321	245		STAT3 Y704	GRLF1 Y1105	197		ACP1 Y132	ANXA2 Y238	222
ACP1 Y132	SHB Y268	196		STAT3 Y704	CAV1 Y14	213		PIK3R2 Y464	PXN Y118	381		STAT3 Y705	EGFR Y1092	245		PTPRA Y798	PRPF4B Y849	197		EFNB2 Y304	AFAP1L2 Y413	221
INPPL1 Y986	DSC3 Y818	195		TFRC Y20	SKT Y393	213		EPHA2 Y575	BCAR1 Y234	381		DYRK1A Y321	ANXA2 Y238	245		MAPK1 Y187	SHC1 Y349	197		FAM59A Y453	ERBB2IP Y1104	220
CRKL Y132	PTRF Y308	195		MAPK14 Y182	GSK3B Y216	213		EGFR Y1197	RIN1 Y36	381		ATA2 Y20	GSK3B Y216	244		FAM59A Y453	MPZL1 Y263	196		SHC1 Y349 Y350	ANXA2 Y30	219
EPHA2 Y588 Y594	SHB Y268	194		MPZL1 Y263	ANXA2 Y238	213		PXN Y118	DSC3 Y818	381		STAT3 Y704	EGFR Y1092	244		RIN1 Y36	TNK2 Y859	196		ATA2 Y20	ANXA2 Y30	218
ENO1 Y44	ITGB4 Y1207	194		ANXA2 Y24	SHC1 Y427	212		INPPL1 Y986	TNK2 Y859	381		EGFR Y1172	SHC1 Y349	244		CRKL Y132	PRPF4B Y849	195		ITGB4 Y1207	GSK3B Y216	218
SHC1 Y349 Y350	PKP3 Y176	193		ATA2 Y20	SHC1 Y349 Y350	210		TNK2 Y859	EGFR Y1092	381		PRPF4B Y849	DYRK1A Y321	244		FAM59A Y453	MAPK3 Y204	195		SHC1 Y349 Y350	DSC3 Y818	217
EPHB1 Y600	ERBB2IP Y1104	193		CRKL Y132	SKT Y393	210		ATA2 Y20	SH2D3A Y231 S218	380		SGK223 Y413	GSK3B Y216	243		PXN Y118	GSK3B Y216	195		RIN1 Y36	ENO1 Y44	217
EPHA2 Y772	PTPN11 Y62	193		EPHA2 Y575	PTPRA Y798	210		CDK2 Y15	PRPF4B Y849	380		DYRK1A Y321	PKP3 Y176	243		ATA2 Y20	INPPL1 Y986	194		CRKL Y132	ANXA2 Y24	216
EGFR Y1172	DSC3 Y818	193		GSK3B Y216	ACP1 Y132	210		DYRK1A Y321	EPHA2 Y588	380		PIK3R2 Y464	SGK223 Y413	242		ATA2 Y20	EGFR Y1092	194		EPHA2 Y575	SHB Y268	216
DSC3 Y818	EGFR Y1092	192		ATA2 Y20	DSC3 Y818	209		EPHA2 Y772	EPHA2 Y588 Y594	379		INPPL1 Y986	CAV1 Y14	242		GSK3B Y216	ALB Y164	194		TFRC Y20	MAPK1 T185 Y187	215
PXN S84 Y88	CRKL Y132	191		ANXA2 Y30	DSC3 Y818	209		EPHA2 Y588 Y594	ALB Y164	379		ENO1 Y44	PTPN11 Y62	242		EGFR Y1197	SHC1 Y427	193		CRKL Y132	MAPK14 Y182	215
EPHA2 Y588 Y594	ERBB2IP Y1104	191		STAT3 Y704	TNK2 Y859	207		INSR Y1185	PTK2 Y397	379		PRPF4B Y849	PTPN11 Y62	242		ANXA2 Y24	INPPL1 Y986	193		PXN Y118	PTRF Y308	215
ANXA2 Y24	SHC1 Y349	191		CRKL Y132	CTNND1 Y228	207		INSR Y1189	PTK2 Y397	378		ENO1 Y44	ACP1 Y132	241		ANXA2 Y24	EGFR Y1092	193		PXN S84 Y88	RIN1 Y36	213
FAM59A Y453	PKP3 Y176	190		EGFR Y1172	TNK2 Y859	207		PTRF Y308	PKP3 Y176	377		LDLR Y845	ANXA2 Y238	241		ITGB4 Y1207	ALB Y164	193		RIN1 Y36	MAPK1 T185 Y187	213
STAT3 Y704	CAV1 Y14	189		TNK2 Y859	EGFR Y1092	207		TFRC Y20	ERBB2IP Y1104	372		ENO1 Y44	LDLR Y845	240		SHC1 Y349 Y350	GPRC5A Y347	192		MPZL1 Y263	ANXA2 Y238	213
SHC1 Y427	DSC3 Y818	189		DSC3 Y818	SHB Y268	207		CRKL Y132	MPZL1 Y263	372		SGK223 Y413	PTK2 Y397	240		GRLF1 Y1105	STAT3 Y705	192		SHC1 Y427	ANXA2 Y30	212
RIN1 Y36	TNK2 Y859	188		SHC1 Y349 Y350	ANXA2 Y30	206		PTRF Y308	LDLR Y845	372		MAPK14 Y182	MPZL1 Y263	240		STAT3 Y704	DSC3 Y818	191		EPHA2 Y772	EPHA2 Y588	212
ITGB4 Y1207	GSK3B Y216	188		GIT1 Y545	FYN Y420	206		PXN Y118	AFAP1L2 Y413	371		PIK3R2 Y464	DYRK1A Y321	239		AFAP1L2 Y413	ITGB4 Y1207	191		ITGB4 Y1207	ANXA2 Y238	212
CAV1 Y14	STAT3 Y705	188		FAM59A Y453	DSC3 Y818	205		INSR Y1189	CRKL Y132	368		BCAR1 Y234	ENO1 Y44	238		INPPL1 Y986	CAV1 Y14	191		ATA2 Y20	EGFR Y1172	211
ATA2 Y20	EGFR Y1172	187		SHC1 Y427	PKP3 Y176	205		EGFR Y1197	MAPK1 Y187	368		ENO1 Y44	BCAR1 Y387	238		DSC3 Y818	STAT3 Y705	191		DYRK1A Y321	FYN Y420	211
ATA2 Y20	INPPL1 Y986	187		PIK3R2 Y464	MPZL1 Y263	204		EPHA2 Y772	BCAR1 Y249	368		TFRC Y20	ENO1 Y44	237		CAV1 Y14	EGFR Y1092	191		CRKL Y132	SHC1 Y349	210
ATA2 Y20	EGFR Y1092	187		CAV1 Y14	PKP3 Y176	204		TFRC Y20	EPHB1 Y600	367		SHC1 Y349 Y350	INPPL1 Y986	237		EPHA2 Y588 Y594	PTPN11 Y62	191		EFNB2 Y304	ANXA2 Y24	210
PTRF Y308	GPRC5A Y347	185		INSR Y1189	SH2D3A Y231 S218	203		EPHA2 Y588	GPRC5A Y347	366		SH2D3A Y231 S218	MAPK1 Y187	237		PTPRA Y798	PXN Y118	189		AFAP1L2 Y413	EGFR Y1092	210
EPHA2 Y588	ACP1 Y132	184		MAPK1 Y187	PRPF4B Y849	203		TFRC Y20	SKT Y393	365		BCAR1 Y234	GSK3B Y216	237		ATA2 Y20	EGFR Y1172	187		CAV1 Y14	PRPF4B Y849	210
TNK2 Y859	SHC1 Y349	183		STAT3 Y704	PKP3 Y176	202		TFRC Y20	FYN Y420	365		PTRF Y308	MPZL1 Y263	237		ENO1 Y44	GSK3B Y216	187		CRKL Y132	RIN1 Y36	209
TFRC Y20	EPHA2 Y588 Y594	183		INPPL1 Y986	CAV1 Y14	202		GIT1 Y545	BCAR1 Y387	365		ENO1 Y44	DSC3 Y818	236		ATA2 Y20	TNK2 Y859	186		FAM59A Y453	SHC1 Y427	209
FAM59A Y453	PTRF Y308	183		TFRC Y20	GRLF1 Y1105	201		EGFR Y1172	MAPK3 Y204	364		SGK223 Y413	ANXA2 Y238	236		BCAR1 Y327	FYN Y420	186		TNK2 Y859	SHC1 Y349	209
EGFR Y1197	DSC3 Y818	183		CDK2 Y15	EPHA2 Y772	201		ENO1 Y44	DSC3 Y818	364		GSK3B Y216	DYRK1A Y321	236		ATA2 Y20	SHC1 Y427	185		TFRC Y20	DSC3 Y818	208
SHB Y268	ANXA2 Y238	181		EPHA2 Y575	PTPN11 Y62	201		PIK3R2 Y464	ENO1 Y44	363		PIK3R2 Y464	FYN Y420	234		CRKL Y132	ITGB4 Y1207	185		EGFR Y1197	ACP1 Y132	208
CRKL Y132	MPZL1 Y263	181		TNK2 Y859	SHC1 Y349	201		BCAR3 Y266	FYN Y420	362		SH2D3A Y231 S218	MAPK3 Y204	234		SHC1 Y349 Y350	MAPK3 Y204	185		PTPRA Y798	GPRC5A Y347	208
SKT Y393	ANXA2 Y238	180		TFRC Y20	CTNND1 Y228	200		ERBB2 Y1248	GPRC5A Y347	361		ENO1 Y44	SHB Y268	234		PXN Y118	AFAP1L2 Y413	184		SKT Y393	DYRK1A Y321	208
SHC1 Y349 Y350	TNK2 Y859	180		SHC1 Y349 Y350	SHC1 Y349	200		CDK2 Y15	ITGB4 Y1207	360		PKP3 Y176	SHB Y268	234		ANXA2 Y24	EGFR Y1172	184		EPHA2 Y588 Y594	PTPN11 Y62	208
PXN Y118	PTK2 Y397	180		STAT3 Y704	TFRC Y20	199		SHC1 Y427	INPPL1 Y986	359		PXN S84 Y88	SH2D3A Y231 S218	233		BCAR3 Y266	FYN Y420	184		LDLR Y845	ACP1 Y132	208
ITGB4 Y1207	PRPF4B Y849	180		STAT3 Y704	RIN1 Y36	199		SHC1 Y427	EGFR Y1092	359		EFNB2 Y304	PTK2 Y397	233		PRPF4B Y849	ALB Y164	184		AFAP1L2 Y413	SGK223 Y413	207
ENO1 Y44	MPZL1 Y263	180		RIN1 Y36	ANXA2 Y24	199		INPPL1 Y986	STAT3 Y705	359		FAM59A Y453	MPZL1 Y263	233		CRKL Y132	ENO1 Y44	183		ERBB2 Y1248	PTK2 Y397	206
DSC3 Y818	SHC1 Y349	180		PXN S84 Y88	DYRK1A Y321	198		STAT3 Y705	EGFR Y1092	359		ATA2 Y20	ANXA2 Y30	232		PXN S84 Y88	ANXA2 Y238	182		BCAR1 Y327	PTK2 Y397	206
BCAR3 Y266	PTK2 Y576	180		CTNND1 Y228	RIN1 Y36	198		ANXA2 Y24	LDLR Y845	358		STAT3 Y704	TNK2 Y859	232		PTPRA Y798	AFAP1L2 Y413	182		CDK2 Y15	ACP1 Y132	206
RIN1 Y36	ANXA2 Y30	179		EPHA2 Y772	GSK3B Y216	198		ENO1 Y44	SGK223 Y413	358		PTK2 Y397	PTK2 Y576	232		RIN1 Y36	ANXA2 Y24	182		FAM59A Y453	RIN1 Y36	206
EPHA2 Y772	LDLR Y845	179		TFRC Y20	DSC3 Y818	197		GPRC5A Y347	SHB Y268	357		TFRC Y20	GPRC5A Y347	231		SGK223 Y413	ALB Y164	182		FAM59A Y453	MPZL1 Y263	206
ATA2 Y20	EGFR Y1197	179		PXN Y118	PTK2 Y576	197		ATA2 Y20	MPZL1 Y263	356		CRKL Y132	LDLR Y845	231		PRPF4B Y849	SHB Y268	182		ANXA2 Y30	ERBB2IP Y1104	206
SHC1 Y349	PKP3 Y176	178		AFAP1L2 Y413	SGK223 Y413	197		ERBB2 Y1248	PTRF Y308	356		EPHA2 Y772	SKT Y393	231		EPHB1 Y600	LDLR Y845	182		CTNND1 Y228	ANXA2 Y24	205
CRKL Y132	ENO1 Y44	178		EPHA2 Y575	PRPF4B Y849	196		SH2D3A Y231 S218	PKP3 Y176	355		PTRF Y308	ANXA2 Y238	231		SGK223 Y413	PRPF4B Y849	181		EGFR Y1172	SHC1 Y427	205
PXN Y118	INSR Y1185	177		CAV1 Y14	EGFR Y1092	195		CRKL Y132	DYRK1A Y321	354		ERBB2 Y1248	ENO1 Y44	230		PXN S84 Y88	EPHA2 Y588 Y594	180		BCAR1 Y387	PTK2 Y397	205
ANXA2 Y30	PKP3 Y176	177		EPHA2 Y588 Y594	EPHA2 Y588	195		CRKL Y132	SHB Y268	352		ERBB2 Y1248	GPRC5A Y347	230		EGFR Y1172	CAV1 Y14	180		GIT1 Y545	FYN Y420	204
ACP1 Y132	MPZL1 Y263	177		GRLF1 Y1105	STAT3 Y705	195		SH2D3A Y231 S218	ENO1 Y44	352		SHC1 Y349 Y350	CDK2 Y15	230		EPHA2 Y588 Y594	ACP1 Y132	180		PTRF Y308	ANXA2 Y238	204
GIT1 Y545	SGK223 Y413	176		BCAR1 Y234	PXN Y118	194		BCAR3 Y266	SKT Y393	352		BCAR1 Y234	INPPL1 Y986	230		INSR Y1189	PTRF Y308	179		PIK3R2 Y464	ACP1 Y132	203
PXN S84 Y88	TFRC Y20	175		MAPK1 Y187	EPHA2 Y772	194		ERBB2 Y1248	ANXA2 Y24	351		DSC3 Y818	GPRC5A Y347	230		SHC1 Y427	MAPK3 Y204	179		GIT1 Y545	EGFR Y1197	203
INSR Y1189	PXN Y118	175		LDLR Y845	ANXA2 Y238	194		ITGB4 Y1207	PTPN11 Y62	351		GPRC5A Y347	PTPN11 Y62	230		INSR Y1185	PTRF Y308	179		ENO1 Y44	SGK223 Y413	203
PXN S84 Y88	SKT Y393	174		BCAR1 Y327	PXN Y118	193		GRLF1 Y1105	PTPN11 Y62	351		ATA2 Y20	TFRC Y20	229		PXN S84 Y88	SKT Y393	178		PRPF4B Y849	GPRC5A Y347	203
TFRC Y20	PTPN11 Y62	172		ANXA2 Y24	CAV1 Y14	193		BCAR3 Y266	EPHB1 Y600	350		PXN S84 Y88	MAPK14 Y182	229		SH2D3A Y231 S218	MPZL1 Y263	178		STAT3 Y704	TNK2 Y859	202
PXN S84 Y88	MAPK1 T185 Y187	172		PXN Y118	BCAR1 Y387	192		RIN1 Y36	MAPK3 Y204	348		CRKL Y132	PTPN11 Y62	229		CTNND1 Y228	MAPK1 Y187	178		CDK2 Y15	MPZL1 Y263	202
INPPL1 Y986	STAT3 Y705	172		RIN1 Y36	STAT3 Y705	192		ATA2 Y20	CAV1 Y14	347		INPPL1 Y986	GSK3B Y216	229		EPHA2 Y588	PTK2 Y397	178		SHC1 Y349 Y350	SHC1 Y349	201
TFRC Y20	LDLR Y845	171		EGFR Y1172	CAV1 Y14	191		CRKL Y132	PTK2 Y397	347		PKP3 Y176	PTPN11 Y62	229		PXN Y118	ALB Y164	177		SH2D3A Y231 S218	MAPK1 Y187	201
STAT3 Y705	EGFR Y1092	171		ITGB4 Y1207	EPHA2 Y588	191		BCAR3 Y266	ERBB2IP Y1104	347		DSC3 Y818	PKP3 Y176	228		PTPN11 Y62	ANXA2 Y238	177		CAV1 Y14	SHC1 Y349	201
STAT3 Y704	INPPL1 Y986	171		SKT Y393	SHB Y268	191		PKP3 Y176	PTK2 Y576	347		CAV1 Y14	EGFR Y1092	228		FAM59A Y453	MAPK1 T185 Y187	176		EPHA2 Y588 Y594	ACP1 Y132	201
STAT3 Y704	EGFR Y1092	170		CTNND1 Y228	INPPL1 Y986	190		CDK2 Y15	GRLF1 Y1105	346		GPRC5A Y347	ACP1 Y132	228		PTPRA Y798	GSK3B Y216	176		TNK2 Y859	STAT3 Y705	200
PIK3R2 Y464	PTK2 Y397	170		CTNND1 Y228	EGFR Y1092	190		INSR Y1185	EPHA2 Y588	346		TFRC Y20	CRKL Y132	227		MAPK1 T185 Y187	ACP1 Y132	176		ERBB2 Y1248	EPHB1 Y600	199
LDLR Y845	ERBB2IP Y1104	170		EPHA2 Y772	MAPK14 Y182	189		PXN S84 Y88	ERBB2IP Y1104	345		ANXA2 Y24	TNK2 Y859	227		ATA2 Y20	DSC3 Y818	175		FAM59A Y453	ENO1 Y44	199
EPHA2 Y575	SHB Y268	170		CAV1 Y14	STAT3 Y705	189		ANXA2 Y30	ALB Y164	345		ITGB4 Y1207	PTRF Y308	227		GIT1 Y545	PRPF4B Y849	175		ANXA2 Y24	CAV1 Y14	199
EGFR Y1172	STAT3 Y705	170		PXN Y118	BCAR1 Y249	188		EGFR Y1197	MAPK3 Y204	344		PRPF4B Y849	EPHA2 Y588	227		CRKL Y132	GSK3B Y216	174		CRKL Y132	ENO1 Y44	198
CRKL Y132	SHC1 Y349	170		AFAP1L2 Y413	FYN Y420	188		INPPL1 Y986	MAPK3 Y204	344		GPRC5A Y347	LDLR Y845	227		ITGB4 Y1207	SGK223 Y413	173		EFNB2 Y304	SHC1 Y427	198
STAT3 Y704	EGFR Y1172	169		PRPF4B Y849	EPHA2 Y588	188		MAPK3 Y204	EGFR Y1092	344		INSR Y1189	CRKL Y132	226		GIT1 Y545	GSK3B Y216	172		PTRF Y308	ACP1 Y132	198
PTPRA Y798	PTK2 Y397	169		PIK3R2 Y464	LDLR Y845	187		BCAR1 Y249	ERBB2IP Y1104	343		ERBB2 Y1248	TNK2 Y859	226		ANXA2 Y24	CAV1 Y14	172		INPPL1 Y986	DYRK1A Y321	197
LDLR Y845	ACP1 Y132	169		TFRC Y20	STAT3 Y705	187		INPPL1 Y986	SHC1 Y349	341		TFRC Y20	ITGB4 Y1207	226		MAPK1 Y187	GPRC5A Y347	172		INSR Y1189	MAPK1 Y187	196
CDK2 Y15	ENO1 Y44	169		TNK2 Y859	SKT Y393	187		SHC1 Y349	EGFR Y1092	341		PTPRA Y798	SGK223 Y413	226		ITGB4 Y1207	SHB Y268	172		EPHA2 Y772	SHB Y268	196
ANXA2 Y30	DSC3 Y818	169		TNK2 Y859	PKP3 Y176	187		PTRF Y308	SHB Y268	341		ANXA2 Y30	PKP3 Y176	226		DSC3 Y818	GRLF1 Y1105	172		ENO1 Y44	INSR Y1185	196
SHC1 Y349 Y350	DSC3 Y818	168		PXN Y118	BCAR3 Y266	186		DYRK1A Y321	GPRC5A Y347	341		EPHA2 Y772	PRPF4B Y849	226		PTK2 Y397	SHB Y268	172		ITGB4 Y1207	LDLR Y845	196
CTNND1 Y228	ACP1 Y132	168		PTRF Y308	LDLR Y845	186		GPRC5A Y347	PTK2 Y397	341		ALB Y164	ANXA2 Y238	226		ENO1 Y44	SGK223 Y413	171		CAV1 Y14	EPHA2 Y588 Y594	196
AFAP1L2 Y413	INSR Y1185	168		GSK3B Y216	EPHA2 Y588	186		INSR Y1189	MAPK1 T185 Y187	340		CRKL Y132	SHC1 Y349	225		GIT1 Y545	ITGB4 Y1207	169		EGFR Y1172	EGFR Y1092	195
PIK3R2 Y464	PXN Y118	167		FAM59A Y453	SKT Y393	185		PTRF Y308	MPZL1 Y263	340		SH2D3A Y231 S218	MAPK14 Y182	225		MAPK1 Y187	CAV1 Y14	169		SGK223 Y413	ACP1 Y132	195
INSR Y1189	AFAP1L2 Y413	167		DSC3 Y818	CAV1 Y14	185		EPHA2 Y772	ALB Y164	339		PTPRA Y798	ERBB2IP Y1104	225		GPRC5A Y347	MPZL1 Y263	169		GPRC5A Y347	MPZL1 Y263	195
SKT Y393	DYRK1A Y321	166		EPHA2 Y588 Y594	ANXA2 Y238	185		EPHA2 Y588 Y594	BCAR1 Y249	339		CDK2 Y15	FAM59A Y453	224		EGFR Y1197	MPZL1 Y263	168		EGFR Y1197	EGFR Y1172	194
SH2D3A Y231 S218	PXN Y118	166		GIT1 Y545	SGK223 Y413	184		ATA2 Y20	AFAP1L2 Y413	338		SH2D3A Y231 S218	PXN Y118	224		RIN1 Y36	INPPL1 Y986	168		ANXA2 Y24	PKP3 Y176	194
GIT1 Y545	GSK3B Y216	166		ITGB4 Y1207	PTRF Y308	184		PXN S84 Y88	FYN Y420	338		SGK223 Y413	PTPN11 Y62	224		RIN1 Y36	EGFR Y1092	168		LDLR Y845	MPZL1 Y263	194
PXN S84 Y88	EFNB2 Y304	165		CAV1 Y14	SHC1 Y349	184		EFNB2 Y304	GIT1 Y545	338		BCAR1 Y327	BCAR1 Y249	223		ENO1 Y44	PTRF Y308	168		ATA2 Y20	CAV1 Y14	193
MAPK1 T185 Y187	SHC1 Y349	165		CTNND1 Y228	EGFR Y1172	183		PXN S84 Y88	EPHB1 Y600	337		TFRC Y20	ANXA2 Y238	223		PXN Y118	SHB Y268	167		INSR Y1189	PTPRA Y798	193
CTNND1 Y228	PKP3 Y176	165		STAT3 Y704	GRLF1 Y1105	182		CRKL Y132	AFAP1L2 Y413	337		EFNB2 Y304	PKP3 Y176	223		EFNB2 Y304	LDLR Y845	166		SHC1 Y427	TNK2 Y859	193
ATA2 Y20	FAM59A Y453	165		SH2D3A Y231 S218	EPHA2 Y588 Y594	181		SHC1 Y349 Y350	FAM59A Y453	337		TNK2 Y859	CAV1 Y14	223		MAPK1 Y187	EGFR Y1172	164		ERBB2 Y1248	EGFR Y1197	192
FAM59A Y453	DSC3 Y818	164		EPHA2 Y575	MAPK3 Y204	181		PRPF4B Y849	GRLF1 Y1105	337		CRKL Y132	PKP3 Y176	221		CDK2 Y15	BCAR1 Y249	163		TFRC Y20	RIN1 Y36	192
ERBB2IP Y1104	PTPN11 Y62	164		EGFR Y1172	SHC1 Y349	181		PXN S84 Y88	SKT Y393	336		SH2D3A Y231 S218	GIT1 Y545	221		SGK223 Y413	SHB Y268	163		SHC1 Y427	CAV1 Y14	192
CRKL Y132	GRLF1 Y1105	164		PTRF Y308	GSK3B Y216	180		ITGB4 Y1207	PRPF4B Y849	336		BCAR1 Y234	AFAP1L2 Y413	221		GRLF1 Y1105	PKP3 Y176	163		BCAR1 Y234	PTPRA Y798	191
FAM59A Y453	CTNND1 Y228	163		CDK2 Y15	MAPK3 Y204	179		SHC1 Y349 Y350	PTK2 Y576	335		PXN S84 Y88	MPZL1 Y263	220		ERBB2 Y1248	RIN1 Y36	162		MAPK1 T185 Y187	PTK2 Y397	191
EGFR Y1197	STAT3 Y705	163		ANXA2 Y24	TNK2 Y859	179		EFNB2 Y304	CDK2 Y15	335		PIK3R2 Y464	TFRC Y20	220		CDK2 Y15	GIT1 Y545	162		FYN Y420	LDLR Y845	191
ACP1 Y132	PTPN11 Y62	163		INPPL1 Y986	SKT Y393	179		RIN1 Y36	INPPL1 Y986	335		CDK2 Y15	PKP3 Y176	220		PTPRA Y798	SGK223 Y413	162		SH2D3A Y231 S218	PTPRA Y798	190
TFRC Y20	EPHA2 Y575	162		TNK2 Y859	STAT3 Y705	179		RIN1 Y36	EGFR Y1092	335		EPHA2 Y588 Y594	EPHB1 Y600	220		AFAP1L2 Y413	ALB Y164	162		EGFR Y1197	CTNND1 Y228	190
STAT3 Y704	EGFR Y1197	162		SKT Y393	EGFR Y1092	179		PTRF Y308	DYRK1A Y321	335		PTRF Y308	GSK3B Y216	220		TNK2 Y859	MAPK3 Y204	162		PTPRA Y798	PXN Y118	190
SHC1 Y427	STAT3 Y705	162		BCAR1 Y249	PTK2 Y576	179		PTRF Y308	EPHA2 Y588	335		STAT3 Y704	INPPL1 Y986	219		TNK2 Y859	MPZL1 Y263	162		ANXA2 Y24	GSK3B Y216	190
GRLF1 Y1105	PTRF Y308	162		CRKL Y132	EFNB2 Y304	178		ANXA2 Y24	MPZL1 Y263	334		SHC1 Y427	TNK2 Y859	219		GIT1 Y545	ALB Y164	161		SHC1 Y427	SGK223 Y413	190
FAM59A Y453	SHC1 Y427	162		PIK3R2 Y464	EPHA2 Y588 Y594	177		INSR Y1189	ANXA2 Y24	333		TNK2 Y859	STAT3 Y705	219		EPHB1 Y600	PTK2 Y397	161		SHC1 Y427	MPZL1 Y263	190
BCAR1 Y387	PTK2 Y576	162		CDK2 Y15	ENO1 Y44	177		CRKL Y132	EPHA2 Y588	333		EPHB1 Y600	PKP3 Y176	219		ATA2 Y20	PTRF Y308	160		ANXA2 Y30	GSK3B Y216	189
ATA2 Y20	STAT3 Y704	162		CDK2 Y15	ACP1 Y132	177		FAM59A Y453	CTNND1 Y228	333		TFRC Y20	PKP3 Y176	218		ATA2 Y20	MPZL1 Y263	160		EPHB1 Y600	PTK2 Y576	189
STAT3 Y704	SHC1 Y427	161		CDK2 Y15	PTK2 Y397	177		PRPF4B Y849	BCAR1 Y387	333		AFAP1L2 Y413	SGK223 Y413	218		EGFR Y1197	MAPK1 Y187	160		SHC1 Y349 Y350	CAV1 Y14	188
ITGB4 Y1207	PTRF Y308	161		RIN1 Y36	SHC1 Y427	177		ATA2 Y20	PKP3 Y176	332		ATA2 Y20	ACP1 Y132	217		PXN Y118	SGK223 Y413	160		RIN1 Y36	PTRF Y308	188
ATA2 Y20	STAT3 Y705	161		INPPL1 Y986	SHC1 Y349	177		INSR Y1185	SHB Y268	332		ANXA2 Y24	MPZL1 Y263	217		SHC1 Y349 Y350	FAM59A Y453	159		ITGB4 Y1207	ACP1 Y132	188
GIT1 Y545	PRPF4B Y849	160		DSC3 Y818	ERBB2IP Y1104	177		INSR Y1189	CAV1 Y14	330		ITGB4 Y1207	LDLR Y845	217		RIN1 Y36	EGFR Y1172	159		CAV1 Y14	PKP3 Y176	188
STAT3 Y704	DSC3 Y818	159		SHC1 Y349	EGFR Y1092	177		TFRC Y20	BCAR1 Y249	330		GSK3B Y216	GPRC5A Y347	217		BCAR3 Y266	BCAR1 Y249	159		SGK223 Y413	MAPK14 Y182	187
SHC1 Y349 Y350	MAPK1 T185 Y187	159		EPHA2 Y575	EPHA2 Y772	176		BCAR3 Y266	BCAR1 Y249	330		CRKL Y132	ACP1 Y132	216		INPPL1 Y986	DSC3 Y818	159		PTRF Y308	GSK3B Y216	187
CRKL Y132	ANXA2 Y30	159		SKT Y393	CAV1 Y14	176		DYRK1A Y321	LDLR Y845	330		EGFR Y1197	ANXA2 Y24	216		DSC3 Y818	EGFR Y1092	159		PTRF Y308	LDLR Y845	187
CRKL Y132	ACP1 Y132	159		PTRF Y308	MPZL1 Y263	176		CRKL Y132	DSC3 Y818	329		PTPRA Y798	ANXA2 Y238	216		TFRC Y20	LDLR Y845	158		TFRC Y20	ANXA2 Y24	186
BCAR3 Y266	FYN Y420	159		PIK3R2 Y464	MAPK1 T185 Y187	175		FAM59A Y453	MPZL1 Y263	329		ATA2 Y20	LDLR Y845	215		AFAP1L2 Y413	SHB Y268	158		CRKL Y132	SHC1 Y427	186
BCAR1 Y249	PTK2 Y576	159		SHC1 Y349 Y350	ANXA2 Y24	175		ANXA2 Y24	EPHA2 Y588	329		PIK3R2 Y464	ACP1 Y132	215		RIN1 Y36	MAPK1 Y187	158		ITGB4 Y1207	PTRF Y308	186
SKT Y393	ACP1 Y132	158		FAM59A Y453	ANXA2 Y24	175		GPRC5A Y347	LDLR Y845	329		CRKL Y132	DSC3 Y818	215		EPHA2 Y772	PTPN11 Y62	158		SHC1 Y349 Y350	EPHB1 Y600	185
EPHA2 Y772	EPHA2 Y588 Y594	158		CTNND1 Y228	SHB Y268	175		AFAP1L2 Y413	PKP3 Y176	328		CRKL Y132	MAPK14 Y182	215		BCAR1 Y249	PTK2 Y576	158		PTPRA Y798	EPHA2 Y588 Y594	185
EPHA2 Y575	ERBB2IP Y1104	158		DSC3 Y818	SHC1 Y349	175		ATA2 Y20	PIK3R2 Y464	327		FAM59A Y453	MAPK14 Y182	215		ATA2 Y20	SH2D3A Y231 S218	157		ANXA2 Y30	TNK2 Y859	185
ENO1 Y44	GRLF1 Y1105	158		EGFR Y1172	SKT Y393	174		ATA2 Y20	DSC3 Y818	327		RIN1 Y36	SHC1 Y427	215		SHC1 Y349 Y350	LDLR Y845	157		EPHA2 Y575	EPHA2 Y588	184
EFNB2 Y304	ANXA2 Y238	158		SHC1 Y427	SHB Y268	174		INSR Y1189	FAM59A Y453	327		EGFR Y1172	SHC1 Y427	215		CTNND1 Y228	ANXA2 Y30	157		RIN1 Y36	MAPK3 Y204	184
DSC3 Y818	STAT3 Y705	158		TNK2 Y859	DSC3 Y818	174		SH2D3A Y231 S218	PXN Y118	327		INPPL1 Y986	STAT3 Y705	215		TNK2 Y859	DSC3 Y818	157		EGFR Y1172	CAV1 Y14	184
CDK2 Y15	ITGB4 Y1207	158		SKT Y393	GRLF1 Y1105	174		BCAR1 Y387	PTPN11 Y62	327		EPHB1 Y600	EPHA2 Y588	215		DYRK1A Y321	BCAR1 Y249	157		PRPF4B Y849	LDLR Y845	184
SH2D3A Y231 S218	MPZL1 Y263	155		SHC1 Y349 Y350	INPPL1 Y986	173		ERBB2 Y1248	INSR Y1185	326		ANXA2 Y24	ANXA2 Y30	214		PTK2 Y397	ANXA2 Y238	157		ATA2 Y20	FAM59A Y453	183
RIN1 Y36	MPZL1 Y263	155		SHC1 Y349 Y350	SKT Y393	173		PIK3R2 Y464	CRKL Y132	326		SHC1 Y349	MPZL1 Y263	214		ERBB2 Y1248	INPPL1 Y986	156		CRKL Y132	AFAP1L2 Y413	183
GRLF1 Y1105	MPZL1 Y263	155		SHC1 Y349 Y350	PKP3 Y176	173		INSR Y1185	DYRK1A Y321	326		ATA2 Y20	RIN1 Y36	213		ERBB2 Y1248	EGFR Y1092	156		SHC1 Y349 Y350	TNK2 Y859	183
CDK2 Y15	GIT1 Y545	154		FAM59A Y453	SHC1 Y427	173		DSC3 Y818	ANXA2 Y238	325		PIK3R2 Y464	PTRF Y308	213		MAPK1 Y187	INPPL1 Y986	156		EGFR Y1172	ANXA2 Y30	183
CDK2 Y15	GPRC5A Y347	154		PXN S84 Y88	ENO1 Y44	172		PIK3R2 Y464	ANXA2 Y238	324		FAM59A Y453	RIN1 Y36	213		MAPK1 Y187	EGFR Y1092	156		EFNB2 Y304	EGFR Y1172	182
PTRF Y308	ACP1 Y132	153		BCAR1 Y327	PTK2 Y576	172		CDK2 Y15	BCAR1 Y387	324		PTRF Y308	PKP3 Y176	213		INSR Y1189	SH2D3A Y231 S218	155		MAPK1 Y187	SHC1 Y427	182
DSC3 Y818	GRLF1 Y1105	153		PRPF4B Y849	PTRF Y308	172		INSR Y1189	CTNND1 Y228	323		PTK2 Y397	ERBB2IP Y1104	213		CDK2 Y15	PTPN11 Y62	155		ANXA2 Y30	DSC3 Y818	182
TFRC Y20	EPHA2 Y588	152		STAT3 Y705	ERBB2IP Y1104	172		INSR Y1189	PTRF Y308	322		EGFR Y1197	FAM59A Y453	212		SH2D3A Y231 S218	INSR Y1185	155		INPPL1 Y986	ALB Y164	182
FAM59A Y453	ANXA2 Y30	152		CDK2 Y15	PRPF4B Y849	171		SH2D3A Y231 S218	INSR Y1185	322		LDLR Y845	PKP3 Y176	212		FAM59A Y453	SHC1 Y427	155		TFRC Y20	FAM59A Y453	180
CRKL Y132	ANXA2 Y24	152		BCAR1 Y234	PTK2 Y576	171		AFAP1L2 Y413	ANXA2 Y238	322		BCAR1 Y234	BCAR3 Y266	211		GSK3B Y216	SHB Y268	155		SHC1 Y427	DSC3 Y818	180
PXN S84 Y88	EPHB1 Y600	151		CTNND1 Y228	TNK2 Y859	171		SHC1 Y349 Y350	CTNND1 Y228	321		INPPL1 Y986	EGFR Y1092	211		ERBB2 Y1248	CAV1 Y14	154		ITGB4 Y1207	SGK223 Y413	180
INPPL1 Y986	PKP3 Y176	151		ANXA2 Y24	SHB Y268	171		EGFR Y1172	INPPL1 Y986	321		SHC1 Y349 Y350	CAV1 Y14	210		GIT1 Y545	PTK2 Y397	154		TNK2 Y859	DSC3 Y818	180
CRKL Y132	SHC1 Y349 Y350	151		BCAR1 Y387	PTK2 Y576	171		EGFR Y1172	EGFR Y1092	321		ENO1 Y44	BCAR1 Y249	210		EFNB2 Y304	PTK2 Y397	153		PRPF4B Y849	ACP1 Y132	179
CRKL Y132	FAM59A Y453	151		STAT3 Y704	DSC3 Y818	170		EPHB1 Y600	BCAR1 Y249	321		SKT Y393	SHB Y268	210		SH2D3A Y231 S218	PTRF Y308	153		EPHA2 Y588	FYN Y420	179
CRKL Y132	MAPK1 T185 Y187	151		TFRC Y20	SHC1 Y427	170		DSC3 Y818	PKP3 Y176	320		GPRC5A Y347	SHB Y268	210		GIT1 Y545	AFAP1L2 Y413	153		CDK2 Y15	PTRF Y308	178
TFRC Y20	EFNB2 Y304	150		SHC1 Y349 Y350	EGFR Y1172	170		ITGB4 Y1207	GSK3B Y216	319		ATA2 Y20	ANXA2 Y24	209		MAPK1 T185 Y187	ANXA2 Y30	153		EFNB2 Y304	RIN1 Y36	177
SGK223 Y413	GSK3B Y216	150		SHC1 Y349 Y350	DSC3 Y818	170		CAV1 Y14	MPZL1 Y263	319		TFRC Y20	GSK3B Y216	209		FAM59A Y453	ANXA2 Y24	152		PXN Y118	ENO1 Y44	177
PXN Y118	MAPK1 Y187	150		SHC1 Y427	DSC3 Y818	170		GRLF1 Y1105	GSK3B Y216	319		ANXA2 Y24	PTRF Y308	209		CTNND1 Y228	LDLR Y845	152		MAPK1 T185 Y187	DYRK1A Y321	177
PXN Y118	MAPK3 Y204	150		SHC1 Y427	GRLF1 Y1105	170		EFNB2 Y304	PTPN11 Y62	318		MAPK14 Y182	SHC1 Y349	209		PIK3R2 Y464	CRKL Y132	151		INPPL1 Y986	EGFR Y1092	177
PTK2 Y397	PTK2 Y576	150		FAM59A Y453	CTNND1 Y228	169		PIK3R2 Y464	PKP3 Y176	317		STAT3 Y704	SHC1 Y349 Y350	208		CTNND1 Y228	GPRC5A Y347	151		FAM59A Y453	MAPK1 Y187	176
GIT1 Y545	PXN Y118	150		SHC1 Y427	SHC1 Y349	169		SGK223 Y413	BCAR1 Y387	316		PIK3R2 Y464	PTPRA Y798	208		ENO1 Y44	ITGB4 Y1207	151		PTPRA Y798	MAPK3 Y204	176
BCAR1 Y234	PTK2 Y576	150		FYN Y420	PTK2 Y576	169		CRKL Y132	SH2D3A Y231 S218	315		SHC1 Y349 Y350	PTRF Y308	208		LDLR Y845	ANXA2 Y238	151		TNK2 Y859	GPRC5A Y347	176
ANXA2 Y24	MPZL1 Y263	150		INSR Y1189	PIK3R2 Y464	168		CRKL Y132	LDLR Y845	315		EGFR Y1197	SHC1 Y427	208		PIK3R2 Y464	PKP3 Y176	150		AFAP1L2 Y413	ANXA2 Y238	175
EPHA2 Y772	ANXA2 Y238	149		CRKL Y132	MAPK1 T185 Y187	168		SKT Y393	BCAR1 Y249	315		EGFR Y1197	EGFR Y1092	208		GIT1 Y545	SGK223 Y413	150		EGFR Y1172	INPPL1 Y986	175
EGFR Y1172	PKP3 Y176	149		SHC1 Y349 Y350	EGFR Y1092	168		EFNB2 Y304	GSK3B Y216	311		PKP3 Y176	ACP1 Y132	208		ANXA2 Y30	SHC1 Y349	150		PTK2 Y397	BCAR1 Y249	175
EFNB2 Y304	ACP1 Y132	149		SH2D3A Y231 S218	EPHB1 Y600	168		PTPRA Y798	SGK223 Y413	311		PXN S84 Y88	CRKL Y132	207		GIT1 Y545	DYRK1A Y321	149		PXN S84 Y88	BCAR1 Y327	174
SKT Y393	PTPN11 Y62	148		SH2D3A Y231 S218	LDLR Y845	168		MAPK1 T185 Y187	PKP3 Y176	311		BCAR1 Y327	PTRF Y308	207		GIT1 Y545	SHB Y268	149		PTPRA Y798	PTPN11 Y62	174
PKP3 Y176	EGFR Y1092	148		EPHA2 Y588	LDLR Y845	168		BCAR1 Y387	GSK3B Y216	311		SHC1 Y349 Y350	STAT3 Y705	207		RIN1 Y36	SHC1 Y427	149		MAPK1 Y187	SGK223 Y413	174
ITGB4 Y1207	MPZL1 Y263	148		ATA2 Y20	RIN1 Y36	167		GIT1 Y545	ITGB4 Y1207	310		PTPRA Y798	GSK3B Y216	207		EGFR Y1172	DSC3 Y818	149		SGK223 Y413	GSK3B Y216	174
GPRC5A Y347	MPZL1 Y263	148		PXN S84 Y88	GSK3B Y216	167		GIT1 Y545	GRLF1 Y1105	310		RIN1 Y36	ANXA2 Y24	207		ANXA2 Y24	PTRF Y308	148		FYN Y420	ANXA2 Y238	174
CRKL Y132	PKP3 Y176	148		EGFR Y1197	SHC1 Y349	167		ITGB4 Y1207	DYRK1A Y321	310		ITGB4 Y1207	ACP1 Y132	207		SHC1 Y427	CAV1 Y14	148		EGFR Y1197	EGFR Y1092	173
SHC1 Y349 Y350	CTNND1 Y228	147		EPHA2 Y772	EPHA2 Y588	166		EFNB2 Y304	PRPF4B Y849	309		DSC3 Y818	SHB Y268	207		BCAR1 Y387	PTPN11 Y62	148		GSK3B Y216	PTPN11 Y62	173
RIN1 Y36	MAPK1 T185 Y187	147		PXN S84 Y88	ACP1 Y132	165		GIT1 Y545	SGK223 Y413	309		STAT3 Y704	CAV1 Y14	206		PIK3R2 Y464	PTRF Y308	147		INSR Y1189	ENO1 Y44	172
PTPRA Y798	PXN Y118	147		EPHA2 Y575	PTK2 Y397	165		EGFR Y1197	INPPL1 Y986	309		TFRC Y20	PRPF4B Y849	206		CDK2 Y15	PXN Y118	147		CRKL Y132	EGFR Y1172	172
CTNND1 Y228	ANXA2 Y30	147		RIN1 Y36	ANXA2 Y30	165		EGFR Y1197	EGFR Y1092	309		CRKL Y132	EGFR Y1172	206		SHC1 Y349	LDLR Y845	147		SGK223 Y413	GPRC5A Y347	172
ANXA2 Y24	EGFR Y1172	147		MAPK1 T185 Y187	EPHB1 Y600	165		ANXA2 Y24	PTK2 Y397	309		SH2D3A Y231 S218	SHC1 Y427	206		CRKL Y132	AFAP1L2 Y413	146		FYN Y420	ACP1 Y132	172
ANXA2 Y24	EGFR Y1092	147		EPHA2 Y588	ACP1 Y132	165		PTK2 Y397	MPZL1 Y263	309		ANXA2 Y30	EPHA2 Y588	206		SHC1 Y349	GPRC5A Y347	146		STAT3 Y704	GPRC5A Y347	171
PIK3R2 Y464	SH2D3A Y231 S218	146		TFRC Y20	ANXA2 Y24	164		PXN S84 Y88	BCAR1 Y249	308		CDK2 Y15	MAPK14 Y182	205		ATA2 Y20	EGFR Y1197	145		PTPRA Y798	PRPF4B Y849	171
ITGB4 Y1207	SGK223 Y413	146		CTNND1 Y228	GRLF1 Y1105	164		AFAP1L2 Y413	GPRC5A Y347	308		FAM59A Y453	EGFR Y1172	205		DSC3 Y818	PKP3 Y176	145		STAT3 Y705	GPRC5A Y347	171
EPHA2 Y588	ERBB2IP Y1104	146		RIN1 Y36	SHC1 Y349	164		ATA2 Y20	INSR Y1185	307		AFAP1L2 Y413	BCAR1 Y249	204		BCAR1 Y387	PTK2 Y397	145		PXN S84 Y88	BCAR3 Y266	170
CTNND1 Y228	SHC1 Y349	146		PRPF4B Y849	MAPK14 Y182	164		SHC1 Y349 Y350	MPZL1 Y263	307		SHC1 Y349 Y350	MPZL1 Y263	203		CRKL Y132	ALB Y164	144		PXN S84 Y88	PTK2 Y397	170
STAT3 Y704	RIN1 Y36	145		INSR Y1189	ANXA2 Y238	163		FAM59A Y453	CAV1 Y14	307		GIT1 Y545	AFAP1L2 Y413	203		FAM59A Y453	PTRF Y308	144		PRPF4B Y849	ANXA2 Y238	170
SKT Y393	EPHA2 Y588 Y594	145		CRKL Y132	SHC1 Y349	163		FAM59A Y453	MAPK1 T185 Y187	305		PTPRA Y798	PRPF4B Y849	203		PTPRA Y798	ALB Y164	144		MAPK1 Y187	INSR Y1185	169
SHC1 Y349	MPZL1 Y263	145		PIK3R2 Y464	INSR Y1185	161		DSC3 Y818	GPRC5A Y347	305		ENO1 Y44	GSK3B Y216	203		SHC1 Y427	PKP3 Y176	144		PIK3R2 Y464	LDLR Y845	168
SGK223 Y413	PRPF4B Y849	145		AFAP1L2 Y413	ALB Y164	161		ACP1 Y132	ERBB2IP Y1104	305		SGK223 Y413	EPHA2 Y588	203		SH2D3A Y231 S218	MAPK1 Y187	143		SHC1 Y349 Y350	CTNND1 Y228	168
RIN1 Y36	STAT3 Y705	145		ENO1 Y44	EPHA2 Y588	161		INSR Y1189	SH2D3A Y231 S218	304		GSK3B Y216	LDLR Y845	203		EGFR Y1197	CAV1 Y14	143		EGFR Y1172	SGK223 Y413	167
GIT1 Y545	AFAP1L2 Y413	145		SGK223 Y413	ALB Y164	161		ERBB2 Y1248	PKP3 Y176	302		ACP1 Y132	ANXA2 Y238	203		PTPRA Y798	BCAR1 Y387	143		EGFR Y1172	MPZL1 Y263	167
EGFR Y1197	ANXA2 Y30	144		PRPF4B Y849	PTK2 Y397	161		ANXA2 Y24	SHB Y268	302		DSC3 Y818	CAV1 Y14	202		ERBB2 Y1248	EGFR Y1172	142		BCAR1 Y327	MAPK1 T185 Y187	166
ANXA2 Y24	INPPL1 Y986	144		INSR Y1185	ANXA2 Y238	161		INSR Y1185	PTK2 Y576	302		ATA2 Y20	ITGB4 Y1207	201		CRKL Y132	PTK2 Y397	142		EPHA2 Y575	SKT Y393	166
SKT Y393	LDLR Y845	143		CRKL Y132	TNK2 Y859	160		PTRF Y308	PTK2 Y397	302		INSR Y1189	CDK2 Y15	201		PIK3R2 Y464	MAPK1 T185 Y187	141		PXN Y118	RIN1 Y36	166
GIT1 Y545	ALB Y164	143		CTNND1 Y228	CAV1 Y14	160		FYN Y420	BCAR1 Y249	302		SHB Y268	PTPN11 Y62	201		BCAR1 Y234	PTPN11 Y62	141		ENO1 Y44	MAPK3 Y204	166
CTNND1 Y228	SKT Y393	142		MAPK1 T185 Y187	ANXA2 Y238	160		PIK3R2 Y464	GPRC5A Y347	301		ATA2 Y20	CAV1 Y14	200		INPPL1 Y986	PTRF Y308	141		TFRC Y20	PTPRA Y798	165
SHC1 Y349 Y350	MPZL1 Y263	141		DSC3 Y818	STAT3 Y705	160		SKT Y393	ACP1 Y132	300		EGFR Y1172	INPPL1 Y986	200		PTRF Y308	EGFR Y1092	141		EFNB2 Y304	ERBB2IP Y1104	165
PIK3R2 Y464	GPRC5A Y347	141		PXN S84 Y88	ITGB4 Y1207	159		GRLF1 Y1105	DYRK1A Y321	300		EPHA2 Y772	EPHA2 Y588 Y594	200		EPHA2 Y588	LDLR Y845	141		PIK3R2 Y464	ANXA2 Y238	164
CTNND1 Y228	MPZL1 Y263	141		SHC1 Y427	ERBB2IP Y1104	159		EPHB1 Y600	ACP1 Y132	300		TFRC Y20	SHB Y268	199		TFRC Y20	PTPN11 Y62	140		CRKL Y132	ACP1 Y132	164
SH2D3A Y231 S218	PTRF Y308	140		SHC1 Y349	SHB Y268	159		AFAP1L2 Y413	INSR Y1185	298		CAV1 Y14	STAT3 Y705	199		PXN Y118	ENO1 Y44	140		SHC1 Y349 Y350	SHC1 Y427	164
MAPK3 Y204	GPRC5A Y347	140		STAT3 Y704	ERBB2IP Y1104	158		SH2D3A Y231 S218	ANXA2 Y238	297		GSK3B Y216	ACP1 Y132	199		EPHB1 Y600	PTPN11 Y62	139		PTPRA Y798	BCAR1 Y387	164
MAPK1 Y187	GPRC5A Y347	140		PRPF4B Y849	MAPK3 Y204	158		FYN Y420	ACP1 Y132	297		PXN S84 Y88	TNK2 Y859	198		PIK3R2 Y464	MPZL1 Y263	138		ANXA2 Y24	EPHA2 Y588 Y594	164
FYN Y420	PTK2 Y576	140		CRKL Y132	EGFR Y1172	157		EPHA2 Y575	BCAR3 Y266	296		TFRC Y20	SGK223 Y413	198		SH2D3A Y231 S218	ANXA2 Y24	138		SGK223 Y413	ANXA2 Y238	164
EGFR Y1197	ANXA2 Y24	140		SHC1 Y349 Y350	CTNND1 Y228	157		MAPK1 T185 Y187	MPZL1 Y263	295		PTPN11 Y62	ANXA2 Y238	198		EPHA2 Y772	PTK2 Y397	138		EPHB1 Y600	GSK3B Y216	164
EGFR Y1197	SHC1 Y349	140		SHC1 Y349 Y350	RIN1 Y36	157		GRLF1 Y1105	ANXA2 Y238	295		ATA2 Y20	EGFR Y1092	197		SHB Y268	ALB Y164	138		INSR Y1189	MPZL1 Y263	163
EGFR Y1197	PKP3 Y176	140		GIT1 Y545	ALB Y164	157		INSR Y1189	SHC1 Y349 Y350	294		ENO1 Y44	PKP3 Y176	197		RIN1 Y36	GRLF1 Y1105	137		PXN S84 Y88	ENO1 Y44	163
RIN1 Y36	EGFR Y1172	139		TFRC Y20	SHC1 Y349	156		CTNND1 Y228	PKP3 Y176	294		ITGB4 Y1207	ERBB2IP Y1104	197		EGFR Y1197	RIN1 Y36	136		PXN S84 Y88	BCAR1 Y387	163
RIN1 Y36	EGFR Y1092	139		EPHA2 Y575	EPHA2 Y588 Y594	156		CTNND1 Y228	MPZL1 Y263	294		ERBB2 Y1248	EGFR Y1172	196		FAM59A Y453	PKP3 Y176	136		INPPL1 Y986	GRLF1 Y1105	163
PXN S84 Y88	DYRK1A Y321	139		FAM59A Y453	SHC1 Y349	156		SH2D3A Y231 S218	GPRC5A Y347	293		CAV1 Y14	PTPN11 Y62	196		PTK2 Y397	BCAR1 Y249	136		SHC1 Y349 Y350	PKP3 Y176	162
PTRF Y308	SHB Y268	139		EPHA2 Y588	MPZL1 Y263	156		DSC3 Y818	PTRF Y308	293		MAPK14 Y182	PTRF Y308	196		PIK3R2 Y464	ERBB2IP Y1104	135		MAPK1 Y187	MPZL1 Y263	162
ENO1 Y44	GSK3B Y216	139		TFRC Y20	SHC1 Y349 Y350	155		PIK3R2 Y464	INSR Y1185	292		PTRF Y308	SHB Y268	196		CRKL Y132	SGK223 Y413	135		BCAR3 Y266	MAPK1 T185 Y187	162
CTNND1 Y228	DSC3 Y818	139		SHC1 Y349 Y350	SHB Y268	155		AFAP1L2 Y413	PTRF Y308	292		FYN Y420	LDLR Y845	196		PXN Y118	DYRK1A Y321	135		BCAR1 Y327	PTPRA Y798	161
GPRC5A Y347	SHB Y268	138		EGFR Y1197	CTNND1 Y228	155		DSC3 Y818	INSR Y1185	292		ERBB2 Y1248	INPPL1 Y986	195		SKT Y393	PTPN11 Y62	135		PIK3R2 Y464	PTRF Y308	161
EPHA2 Y575	EPHA2 Y772	138		RIN1 Y36	PKP3 Y176	155		PIK3R2 Y464	PTRF Y308	291		EPHA2 Y575	SKT Y393	195		GRLF1 Y1105	MPZL1 Y263	135		AFAP1L2 Y413	LDLR Y845	161
CTNND1 Y228	ANXA2 Y24	138		PIK3R2 Y464	EFNB2 Y304	154		ITGB4 Y1207	ANXA2 Y238	289		EPHA2 Y772	EPHA2 Y588	195		ATA2 Y20	FAM59A Y453	134		ITGB4 Y1207	GPRC5A Y347	161
BCAR1 Y327	PTK2 Y576	138		EPHA2 Y772	MAPK3 Y204	154		ERBB2 Y1248	PXN Y118	288		ITGB4 Y1207	PTPN11 Y62	195		SH2D3A Y231 S218	MAPK1 T185 Y187	134		EPHB1 Y600	PTRF Y308	161
RIN1 Y36	INPPL1 Y986	137		CAV1 Y14	GRLF1 Y1105	154		CAV1 Y14	SHB Y268	288		CDK2 Y15	SHC1 Y349	194		GIT1 Y545	PTPN11 Y62	134		TFRC Y20	SGK223 Y413	160
EPHA2 Y588 Y594	ACP1 Y132	137		SHC1 Y349 Y350	FAM59A Y453	153		GIT1 Y545	PTPN11 Y62	286		FAM59A Y453	ANXA2 Y30	194		CTNND1 Y228	ERBB2IP Y1104	134		SH2D3A Y231 S218	ENO1 Y44	160
ENO1 Y44	PRPF4B Y849	137		SH2D3A Y231 S218	MPZL1 Y263	153		EPHA2 Y588	PKP3 Y176	286		PTPRA Y798	ANXA2 Y30	194		ATA2 Y20	GRLF1 Y1105	133		EGFR Y1197	PTK2 Y576	160
PXN S84 Y88	MPZL1 Y263	136		CAV1 Y14	ERBB2IP Y1104	153		EPHA2 Y588	MPZL1 Y263	286		SKT Y393	EPHA2 Y588 Y594	194		BCAR1 Y234	PTK2 Y397	133		AFAP1L2 Y413	TNK2 Y859	160
GRLF1 Y1105	PKP3 Y176	136		CDK2 Y15	PTPRA Y798	152		CDK2 Y15	LDLR Y845	285		INSR Y1185	EPHB1 Y600	194		BCAR1 Y234	SHB Y268	133		SKT Y393	GRLF1 Y1105	160
FAM59A Y453	CAV1 Y14	136		EPHA2 Y772	PTRF Y308	152		AFAP1L2 Y413	ANXA2 Y24	285		LDLR Y845	SHB Y268	194		AFAP1L2 Y413	PTRF Y308	133		EPHB1 Y600	ANXA2 Y238	160
EFNB2 Y304	EPHA2 Y588	136		EPHA2 Y772	PTK2 Y397	152		INSR Y1185	LDLR Y845	285		ATA2 Y20	PIK3R2 Y464	193		ANXA2 Y24	MAPK1 Y187	133		LDLR Y845	PTPN11 Y62	160
CRKL Y132	ITGB4 Y1207	136		CRKL Y132	INPPL1 Y986	151		DYRK1A Y321	MPZL1 Y263	284		ERBB2 Y1248	ANXA2 Y30	193		ATA2 Y20	MAPK1 Y187	132		PXN S84 Y88	DYRK1A Y321	159
ANXA2 Y30	INPPL1 Y986	135		CRKL Y132	EGFR Y1092	151		GIT1 Y545	GSK3B Y216	283		FAM59A Y453	PTRF Y308	193		EGFR Y1197	PTRF Y308	132		PIK3R2 Y464	GSK3B Y216	159
ANXA2 Y30	EGFR Y1092	135		EFNB2 Y304	EPHB1 Y600	151		ANXA2 Y24	DSC3 Y818	283		ITGB4 Y1207	DSC3 Y818	193		SHC1 Y427	GPRC5A Y347	132		EFNB2 Y304	MAPK1 Y187	159
SKT Y393	EPHA2 Y588	134		EGFR Y1197	TNK2 Y859	151		PIK3R2 Y464	ANXA2 Y24	282		ATA2 Y20	FAM59A Y453	192		SHC1 Y349	ERBB2IP Y1104	132		AFAP1L2 Y413	MPZL1 Y263	159
SHC1 Y427	MPZL1 Y263	134		INSR Y1189	MAPK1 T185 Y187	150		SHC1 Y349 Y350	INSR Y1185	282		ATA2 Y20	TNK2 Y859	192		SHC1 Y349 Y350	PXN Y118	131		DSC3 Y818	CAV1 Y14	159
PRPF4B Y849	GPRC5A Y347	134		SH2D3A Y231 S218	PTPN11 Y62	150		TFRC Y20	EPHA2 Y772	281		CDK2 Y15	SHB Y268	192		PTPRA Y798	PTK2 Y397	131		PIK3R2 Y464	EPHA2 Y588	158
EPHA2 Y575	SKT Y393	134		PTPRA Y798	PRPF4B Y849	150		EFNB2 Y304	BCAR1 Y234	281		PXN Y118	RIN1 Y36	192		LDLR Y845	ACP1 Y132	131		CRKL Y132	MAPK1 Y187	158
EGFR Y1197	RIN1 Y36	134		MAPK1 Y187	ENO1 Y44	150		PXN Y118	SGK223 Y413	281		BCAR3 Y266	BCAR1 Y249	192		BCAR1 Y327	BCAR1 Y249	130		MAPK1 T185 Y187	BCAR1 Y387	158
EGFR Y1172	ANXA2 Y30	134		PTRF Y308	ACP1 Y132	150		CAV1 Y14	DYRK1A Y321	281		GPRC5A Y347	PKP3 Y176	192		PTPRA Y798	ENO1 Y44	130		TNK2 Y859	EGFR Y1092	158
EFNB2 Y304	LDLR Y845	134		EFNB2 Y304	PKP3 Y176	149		ERBB2 Y1248	PTPRA Y798	280		ATA2 Y20	SHC1 Y427	191		ANXA2 Y24	GRLF1 Y1105	130		SKT Y393	ALB Y164	158
PXN S84 Y88	SHB Y268	133		PIK3R2 Y464	EPHB1 Y600	148		ENO1 Y44	PTK2 Y397	280		DSC3 Y818	ANXA2 Y238	190		EGFR Y1172	PTRF Y308	130		GSK3B Y216	FYN Y420	158
MAPK1 T185 Y187	ANXA2 Y30	133		TFRC Y20	CRKL Y132	148		CAV1 Y14	EPHA2 Y588	280		ATA2 Y20	INPPL1 Y986	189		ANXA2 Y30	LDLR Y845	130		CDK2 Y15	FYN Y420	157
EPHB1 Y600	ANXA2 Y238	133		SHC1 Y427	INPPL1 Y986	148		ANXA2 Y24	DYRK1A Y321	279		BCAR1 Y327	INSR Y1185	189		BCAR1 Y387	SHB Y268	130		EPHB1 Y600	LDLR Y845	157
EFNB2 Y304	ALB Y164	133		MAPK14 Y182	DYRK1A Y321	148		EPHA2 Y575	ERBB2IP Y1104	278		BCAR1 Y327	GSK3B Y216	189		FYN Y420	ALB Y164	130		PIK3R2 Y464	DYRK1A Y321	156
AFAP1L2 Y413	GSK3B Y216	133		CRKL Y132	CAV1 Y14	147		PKP3 Y176	SHB Y268	278		GIT1 Y545	RIN1 Y36	189		ANXA2 Y24	DSC3 Y818	129		RIN1 Y36	MAPK14 Y182	156
ACP1 Y132	ANXA2 Y238	133		ENO1 Y44	PTRF Y308	146		BCAR3 Y266	EPHA2 Y772	277		ACP1 Y132	SHB Y268	189		GIT1 Y545	ENO1 Y44	128		EPHA2 Y588 Y594	MPZL1 Y263	156
STAT3 Y704	ANXA2 Y24	132		SGK223 Y413	DYRK1A Y321	146		GIT1 Y545	PRPF4B Y849	275		ATA2 Y20	ANXA2 Y238	187		DYRK1A Y321	PTPN11 Y62	128		TFRC Y20	PTRF Y308	155
SHC1 Y349	EGFR Y1092	132		GRLF1 Y1105	SHC1 Y349	145		STAT3 Y704	RIN1 Y36	274		BCAR1 Y327	EPHB1 Y600	187		CRKL Y132	PTPRA Y798	127		CDK2 Y15	GPRC5A Y347	155
SH2D3A Y231 S218	MAPK14 Y182	132		PXN S84 Y88	SGK223 Y413	144		FAM59A Y453	PTK2 Y397	274		PIK3R2 Y464	AFAP1L2 Y413	187		MAPK1 Y187	DSC3 Y818	127		BCAR3 Y266	FYN Y420	155
MAPK1 T185 Y187	ACP1 Y132	132		SHC1 Y349 Y350	GRLF1 Y1105	144		RIN1 Y36	TNK2 Y859	274		PIK3R2 Y464	DSC3 Y818	187		MAPK1 Y187	MPZL1 Y263	127		ENO1 Y44	MPZL1 Y263	155
GIT1 Y545	PTPRA Y798	132		ATA2 Y20	FAM59A Y453	143		ATA2 Y20	ERBB2 Y1248	273		PIK3R2 Y464	PTPN11 Y62	187		SHC1 Y427	MPZL1 Y263	127		CAV1 Y14	ERBB2IP Y1104	154
EPHA2 Y772	ACP1 Y132	132		SH2D3A Y231 S218	EPHA2 Y588	143		EPHA2 Y575	EPHA2 Y772	271		AFAP1L2 Y413	ITGB4 Y1207	187		INPPL1 Y986	MPZL1 Y263	127		PRPF4B Y849	SHB Y268	154
EGFR Y1172	SHC1 Y349	132		FAM59A Y453	MPZL1 Y263	143		EFNB2 Y304	SGK223 Y413	270		GRLF1 Y1105	ERBB2IP Y1104	187		EPHA2 Y588 Y594	PTK2 Y397	127		EPHB1 Y600	EPHA2 Y588	154
EFNB2 Y304	CTNND1 Y228	132		PTPRA Y798	EPHA2 Y772	143		SH2D3A Y231 S218	ANXA2 Y24	270		EPHA2 Y588	ANXA2 Y238	187		MPZL1 Y263	EGFR Y1092	127		PIK3R2 Y464	BCAR3 Y266	153
EFNB2 Y304	PTPN11 Y62	132		PRPF4B Y849	GPRC5A Y347	143		CDK2 Y15	GIT1 Y545	269		ATA2 Y20	DSC3 Y818	186		MAPK1 T185 Y187	MAPK3 Y204	126		TFRC Y20	BCAR1 Y387	153
STAT3 Y704	SHC1 Y349	131		CRKL Y132	SHC1 Y349 Y350	142		PXN Y118	PTK2 Y397	269		ATA2 Y20	PTPN11 Y62	186		ERBB2 Y1248	EGFR Y1197	125		CDK2 Y15	SGK223 Y413	153
SHC1 Y349	STAT3 Y705	131		EFNB2 Y304	ANXA2 Y238	142		SGK223 Y413	GRLF1 Y1105	269		AFAP1L2 Y413	ANXA2 Y238	186		CAV1 Y14	MAPK3 Y204	125		CDK2 Y15	EPHA2 Y588 Y594	153
GSK3B Y216	GPRC5A Y347	131		CDK2 Y15	GPRC5A Y347	142		SH2D3A Y231 S218	PTRF Y308	268		PRPF4B Y849	ACP1 Y132	186		ATA2 Y20	ERBB2 Y1248	124		SH2D3A Y231 S218	MPZL1 Y263	153
FAM59A Y453	ENO1 Y44	131		EGFR Y1197	SKT Y393	142		FAM59A Y453	RIN1 Y36	267		EPHA2 Y588 Y594	ANXA2 Y238	186		BCAR1 Y327	EPHA2 Y575	124		PTPRA Y798	BCAR1 Y249	153
CTNND1 Y228	RIN1 Y36	131		MAPK1 Y187	ACP1 Y132	142		ITGB4 Y1207	SGK223 Y413	267		GPRC5A Y347	BCAR1 Y249	186		SHC1 Y349 Y350	ERBB2IP Y1104	124		EPHB1 Y600	MPZL1 Y263	153
ATA2 Y20	CRKL Y132	131		EGFR Y1172	SHC1 Y427	142		ATA2 Y20	CRKL Y132	266		GIT1 Y545	GSK3B Y216	185		EGFR Y1197	AFAP1L2 Y413	124		PTRF Y308	FYN Y420	153
ANXA2 Y24	STAT3 Y705	131		MAPK1 T185 Y187	PKP3 Y176	142		MPZL1 Y263	SHB Y268	266		EPHA2 Y772	PTK2 Y397	185		EGFR Y1197	DSC3 Y818	124		PXN S84 Y88	FAM59A Y453	152
TFRC Y20	ANXA2 Y30	130		SHC1 Y427	EGFR Y1092	142		BCAR1 Y327	PRPF4B Y849	264		INSR Y1185	PTK2 Y397	185		BCAR1 Y234	BCAR3 Y266	124		PIK3R2 Y464	CDK2 Y15	152
SGK223 Y413	INSR Y1185	130		EPHB1 Y600	ANXA2 Y238	142		TFRC Y20	BCAR1 Y234	264		FYN Y420	BCAR1 Y249	185		AFAP1L2 Y413	MPZL1 Y263	124		ATA2 Y20	ACP1 Y132	151
INPPL1 Y986	SHC1 Y349	130		EPHA2 Y588	ANXA2 Y238	142		CAV1 Y14	LDLR Y845	264		EGFR Y1172	EGFR Y1092	184		MAPK1 T185 Y187	ERBB2IP Y1104	124		PXN S84 Y88	CRKL Y132	151
CTNND1 Y228	PTRF Y308	130		FAM59A Y453	ANXA2 Y30	141		BCAR1 Y249	ALB Y164	264		BCAR3 Y266	ANXA2 Y238	184		CAV1 Y14	GRLF1 Y1105	124		EFNB2 Y304	PTRF Y308	151
CRKL Y132	RIN1 Y36	130		RIN1 Y36	CAV1 Y14	141		TFRC Y20	EPHA2 Y575	263		ANXA2 Y30	EPHA2 Y588 Y594	184		PTRF Y308	GPRC5A Y347	124		FAM59A Y453	AFAP1L2 Y413	151
PKP3 Y176	MPZL1 Y263	129		INPPL1 Y986	DSC3 Y818	141		ATA2 Y20	CTNND1 Y228	261		INPPL1 Y986	SHC1 Y349	184		GPRC5A Y347	LDLR Y845	124		SHC1 Y427	PKP3 Y176	151
MAPK1 T185 Y187	MAPK14 Y182	129		DSC3 Y818	EGFR Y1092	141		ATA2 Y20	GPRC5A Y347	261		INPPL1 Y986	BCAR1 Y249	184		CRKL Y132	PTRF Y308	122		ANXA2 Y30	EPHA2 Y588 Y594	150
MAPK1 T185 Y187	MPZL1 Y263	129		ATA2 Y20	SHB Y268	140		ERBB2 Y1248	RIN1 Y36	261		SKT Y393	EPHA2 Y588	184		EFNB2 Y304	MAPK1 T185 Y187	122		PRPF4B Y849	MPZL1 Y263	150
INSR Y1189	SGK223 Y413	129		STAT3 Y704	SHC1 Y349	140		ATA2 Y20	MAPK1 T185 Y187	260		PXN S84 Y88	ANXA2 Y24	183		EPHA2 Y575	BCAR3 Y266	122		EPHA2 Y588 Y594	EPHA2 Y588	150
ENO1 Y44	GPRC5A Y347	129		CRKL Y132	RIN1 Y36	140		CRKL Y132	SHC1 Y349 Y350	260		PXN Y118	AFAP1L2 Y413	183		FAM59A Y453	CTNND1 Y228	122		ATA2 Y20	TFRC Y20	149
CDK2 Y15	PTPRA Y798	129		TNK2 Y859	ERBB2IP Y1104	140		PTK2 Y397	PTK2 Y576	258		RIN1 Y36	ENO1 Y44	183		ANXA2 Y24	GPRC5A Y347	121		PXN S84 Y88	INSR Y1185	149
PTPRA Y798	ITGB4 Y1207	128		PTPN11 Y62	ANXA2 Y238	140		EPHA2 Y575	EPHB1 Y600	257		CAV1 Y14	PRPF4B Y849	183		EGFR Y1172	MPZL1 Y263	121		ERBB2 Y1248	PIK3R2 Y464	149
EPHB1 Y600	ALB Y164	128		CRKL Y132	DSC3 Y818	139		RIN1 Y36	STAT3 Y705	257		PIK3R2 Y464	EPHA2 Y588	182		DYRK1A Y321	ALB Y164	121		BCAR1 Y234	PTK2 Y397	149
BCAR1 Y327	FYN Y420	128		EGFR Y1197	CAV1 Y14	139		PXN S84 Y88	EPHA2 Y772	256		CTNND1 Y228	DSC3 Y818	182		LDLR Y845	ERBB2IP Y1104	121		SGK223 Y413	LDLR Y845	149
MAPK1 T185 Y187	PKP3 Y176	127		MAPK1 T185 Y187	INSR Y1185	139		PIK3R2 Y464	MAPK3 Y204	256		PTPRA Y798	PTK2 Y397	182		PXN S84 Y88	PTK2 Y397	120		PRPF4B Y849	EPHA2 Y588	149
GIT1 Y545	ITGB4 Y1207	127		TNK2 Y859	GRLF1 Y1105	139		DSC3 Y818	MAPK3 Y204	256		ATA2 Y20	CDK2 Y15	181		MAPK1 Y187	PTRF Y308	120		PTPN11 Y62	ANXA2 Y238	149
ANXA2 Y24	PTRF Y308	127		MPZL1 Y263	SHB Y268	139		INSR Y1189	AFAP1L2 Y413	255		INSR Y1189	ANXA2 Y24	181		PKP3 Y176	MPZL1 Y263	120		PXN S84 Y88	BCAR1 Y234	148
TFRC Y20	CTNND1 Y228	126		ANXA2 Y30	SHB Y268	138		CRKL Y132	PTK2 Y576	255		PXN S84 Y88	FAM59A Y453	181		ACP1 Y132	PTK2 Y397	120		BCAR1 Y327	TFRC Y20	148
SHC1 Y349 Y350	EGFR Y1197	125		EPHA2 Y772	GPRC5A Y347	138		SH2D3A Y231 S218	MPZL1 Y263	255		CDK2 Y15	EGFR Y1172	181		SHB Y268	ERBB2IP Y1104	120		BCAR1 Y327	DSC3 Y818	148
PXN S84 Y88	EPHA2 Y588	125		ITGB4 Y1207	PTPN11 Y62	138		MAPK14 Y182	PTPN11 Y62	254		PRPF4B Y849	GRLF1 Y1105	181		INSR Y1189	PIK3R2 Y464	119		PIK3R2 Y464	MPZL1 Y263	148
PTPRA Y798	PRPF4B Y849	125		INSR Y1189	EFNB2 Y304	137		DYRK1A Y321	PKP3 Y176	254		PXN S84 Y88	EGFR Y1172	180		PXN S84 Y88	GIT1 Y545	119		TFRC Y20	ANXA2 Y238	148
ERBB2 Y1248	ANXA2 Y238	125		PXN S84 Y88	ALB Y164	137		ERBB2 Y1248	SHC1 Y427	252		BCAR1 Y327	FYN Y420	180		PIK3R2 Y464	INSR Y1185	119		CDK2 Y15	EPHB1 Y600	148
CRKL Y132	DSC3 Y818	125		EPHA2 Y588	GPRC5A Y347	137		ENO1 Y44	GRLF1 Y1105	252		SHC1 Y349	STAT3 Y705	180		EFNB2 Y304	PTPN11 Y62	119		ITGB4 Y1207	PRPF4B Y849	148
SGK223 Y413	ALB Y164	124		RIN1 Y36	ERBB2IP Y1104	136		ERBB2 Y1248	EGFR Y1172	251		GSK3B Y216	EPHA2 Y588	180		SH2D3A Y231 S218	RIN1 Y36	119		DSC3 Y818	BCAR1 Y387	148
PTPRA Y798	GPRC5A Y347	124		MAPK1 T185 Y187	ERBB2IP Y1104	136		EFNB2 Y304	EPHA2 Y575	251		PKP3 Y176	ERBB2IP Y1104	180		GIT1 Y545	PTPRA Y798	119		GSK3B Y216	ERBB2IP Y1104	148
FYN Y420	BCAR1 Y249	124		SKT Y393	PKP3 Y176	136		EPHA2 Y575	SKT Y393	251		PIK3R2 Y464	EPHA2 Y588 Y594	179		RIN1 Y36	MAPK3 Y204	119		CDK2 Y15	AFAP1L2 Y413	147
FAM59A Y453	ITGB4 Y1207	124		EGFR Y1172	DSC3 Y818	135		GPRC5A Y347	PTK2 Y576	251		BCAR1 Y234	FYN Y420	179		SGK223 Y413	PTK2 Y576	119		GIT1 Y545	CTNND1 Y228	147
CDK2 Y15	SGK223 Y413	124		ATA2 Y20	TFRC Y20	134		SHC1 Y349 Y350	GPRC5A Y347	250		CTNND1 Y228	ERBB2IP Y1104	179		INSR Y1189	FAM59A Y453	118		CAV1 Y14	GSK3B Y216	147
ANXA2 Y24	MAPK1 T185 Y187	124		SHC1 Y349 Y350	ERBB2IP Y1104	134		FAM59A Y453	INSR Y1185	250		ANXA2 Y24	MAPK14 Y182	179		STAT3 Y704	CAV1 Y14	118		PTRF Y308	GPRC5A Y347	147
PXN S84 Y88	PTRF Y308	123		FAM59A Y453	PKP3 Y176	134		ACP1 Y132	BCAR1 Y249	250		SHC1 Y427	EGFR Y1092	179		PIK3R2 Y464	SHC1 Y349 Y350	118		CRKL Y132	PTRF Y308	146
GPRC5A Y347	ACP1 Y132	123		TFRC Y20	ANXA2 Y30	133		INSR Y1189	DSC3 Y818	249		DSC3 Y818	GRLF1 Y1105	179		SHC1 Y349 Y350	MAPK1 Y187	118		BCAR1 Y234	DSC3 Y818	146
ERBB2 Y1248	LDLR Y845	123		FAM59A Y453	LDLR Y845	133		EFNB2 Y304	BCAR1 Y249	249		PRPF4B Y849	EPHA2 Y588 Y594	179		FAM59A Y453	INSR Y1185	118		RIN1 Y36	MAPK1 Y187	146
BCAR1 Y387	FYN Y420	123		RIN1 Y36	TNK2 Y859	133		INSR Y1189	PIK3R2 Y464	248		EPHA2 Y588 Y594	PTK2 Y397	179		AFAP1L2 Y413	ANXA2 Y24	118		EGFR Y1172	MAPK14 Y182	146
AFAP1L2 Y413	ITGB4 Y1207	123		ANXA2 Y24	SKT Y393	133		ERBB2 Y1248	EGFR Y1197	248		STAT3 Y704	SHC1 Y349	178		SKT Y393	LDLR Y845	118		EPHA2 Y588 Y594	SHB Y268	146
TFRC Y20	MAPK1 T185 Y187	122		ANXA2 Y30	INPPL1 Y986	133		ENO1 Y44	ITGB4 Y1207	247		CRKL Y132	TNK2 Y859	178		CAV1 Y14	STAT3 Y705	118		MAPK14 Y182	MPZL1 Y263	146
STAT3 Y704	PKP3 Y176	122		GSK3B Y216	PTPN11 Y62	133		ERBB2 Y1248	SHC1 Y349	246		CTNND1 Y228	PRPF4B Y849	178		CDK2 Y15	ITGB4 Y1207	117		RIN1 Y36	ANXA2 Y24	145
PTPRA Y798	EPHA2 Y772	122		EFNB2 Y304	ERBB2IP Y1104	132		INSR Y1189	ERBB2 Y1248	245		BCAR1 Y387	GSK3B Y216	178		MAPK1 Y187	PKP3 Y176	117		TNK2 Y859	SGK223 Y413	145
MAPK1 Y187	MAPK1 T185 Y187	122		PIK3R2 Y464	PTPN11 Y62	131		EPHA2 Y588 Y594	ERBB2IP Y1104	245		ATA2 Y20	EGFR Y1172	177		EPHA2 Y772	SHB Y268	117		TNK2 Y859	MPZL1 Y263	145
MAPK1 T185 Y187	MAPK3 Y204	122		EFNB2 Y304	GRLF1 Y1105	131		PXN S84 Y88	BCAR1 Y234	244		SHC1 Y349 Y350	SHC1 Y427	177		TNK2 Y859	PKP3 Y176	117		GPRC5A Y347	LDLR Y845	145
EPHB1 Y600	ACP1 Y132	122		EPHA2 Y575	MAPK1 Y187	131		SH2D3A Y231 S218	MAPK3 Y204	244		BCAR1 Y234	INSR Y1185	177		GRLF1 Y1105	PTRF Y308	117		STAT3 Y704	EGFR Y1092	143
EPHA2 Y575	ACP1 Y132	122		AFAP1L2 Y413	DYRK1A Y321	131		LDLR Y845	PKP3 Y176	244		BCAR1 Y234	EPHB1 Y600	177		BCAR1 Y234	PTPRA Y798	116		CRKL Y132	MAPK1 T185 Y187	143
ANXA2 Y24	GRLF1 Y1105	122		SHC1 Y427	SKT Y393	131		PTPN11 Y62	ANXA2 Y238	244		SGK223 Y413	EPHA2 Y588 Y594	177		FAM59A Y453	SHC1 Y349	116		ITGB4 Y1207	EPHB1 Y600	143
ACP1 Y132	ERBB2IP Y1104	122		PKP3 Y176	SHB Y268	131		PIK3R2 Y464	PTPRA Y798	243		SGK223 Y413	INSR Y1185	177		AFAP1L2 Y413	PTK2 Y576	116		FYN Y420	MPZL1 Y263	143
TFRC Y20	SHB Y268	121		ATA2 Y20	INPPL1 Y986	130		BCAR1 Y234	EPHA2 Y588 Y594	243		ATA2 Y20	ENO1 Y44	176		RIN1 Y36	ENO1 Y44	116		PIK3R2 Y464	ITGB4 Y1207	142
STAT3 Y705	PKP3 Y176	121		TFRC Y20	MPZL1 Y263	130		PTPRA Y798	DSC3 Y818	243		INSR Y1189	PTK2 Y397	176		ENO1 Y44	ALB Y164	116		TFRC Y20	ACP1 Y132	142
PXN Y118	SGK223 Y413	121		MAPK1 T185 Y187	GRLF1 Y1105	130		ENO1 Y44	CAV1 Y14	243		PXN S84 Y88	MAPK1 T185 Y187	176		EPHA2 Y588	BCAR1 Y249	116		CRKL Y132	EPHA2 Y588 Y594	142
PXN S84 Y88	ALB Y164	121		PRPF4B Y849	PTPN11 Y62	130		PXN S84 Y88	EPHA2 Y575	242		TFRC Y20	CAV1 Y14	176		SH2D3A Y231 S218	ENO1 Y44	115		CRKL Y132	ERBB2IP Y1104	142
ERBB2 Y1248	PTPN11 Y62	121		PXN S84 Y88	CDK2 Y15	129		EPHA2 Y588 Y594	EPHB1 Y600	242		SH2D3A Y231 S218	ENO1 Y44	176		EGFR Y1197	MAPK3 Y204	115		BCAR1 Y234	MAPK1 T185 Y187	142
CRKL Y132	SHC1 Y427	121		PIK3R2 Y464	EPHA2 Y588	129		SHC1 Y349 Y350	SHC1 Y427	241		FAM59A Y453	TNK2 Y859	176		AFAP1L2 Y413	TNK2 Y859	115		EPHA2 Y588 Y594	LDLR Y845	142
CDK2 Y15	AFAP1L2 Y413	121		EFNB2 Y304	ANXA2 Y30	129		GRLF1 Y1105	PKP3 Y176	241		EPHA2 Y588 Y594	GSK3B Y216	176		ANXA2 Y30	MAPK3 Y204	115		INSR Y1189	PXN S84 Y88	141
CAV1 Y14	GRLF1 Y1105	121		EFNB2 Y304	INSR Y1185	129		ERBB2 Y1248	ENO1 Y44	240		PXN S84 Y88	CDK2 Y15	175		ENO1 Y44	SHB Y268	115		PXN S84 Y88	SH2D3A Y231 S218	141
AFAP1L2 Y413	PRPF4B Y849	121		CDK2 Y15	MAPK14 Y182	129		ERBB2 Y1248	LDLR Y845	240		TFRC Y20	BCAR3 Y266	175		BCAR1 Y249	PTPN11 Y62	115		PXN S84 Y88	BCAR1 Y249	141
RIN1 Y36	PTRF Y308	120		LDLR Y845	SHB Y268	129		AFAP1L2 Y413	MAPK3 Y204	239		EGFR Y1197	INPPL1 Y986	175		PXN S84 Y88	LDLR Y845	114		AFAP1L2 Y413	ANXA2 Y24	141
PXN S84 Y88	GRLF1 Y1105	120		ATA2 Y20	EFNB2 Y304	128		EFNB2 Y304	ANXA2 Y238	238		SHC1 Y427	INPPL1 Y986	175		GPRC5A Y347	PKP3 Y176	114		ITGB4 Y1207	FYN Y420	141
MPZL1 Y263	SHB Y268	120		EFNB2 Y304	DSC3 Y818	128		EPHA2 Y575	FYN Y420	238		ANXA2 Y30	EPHB1 Y600	175		ERBB2 Y1248	PKP3 Y176	113		STAT3 Y705	EGFR Y1092	141
EPHB1 Y600	EPHA2 Y588	120		EPHA2 Y575	LDLR Y845	128		TFRC Y20	ALB Y164	237		ITGB4 Y1207	EPHB1 Y600	175		SHC1 Y349 Y350	SH2D3A Y231 S218	113		EPHA2 Y588	PTPN11 Y62	141
CTNND1 Y228	GRLF1 Y1105	120		GIT1 Y545	DYRK1A Y321	128		DYRK1A Y321	ANXA2 Y238	237		PRPF4B Y849	LDLR Y845	175		SHC1 Y349 Y350	ITGB4 Y1207	113		TFRC Y20	LDLR Y845	140
CRKL Y132	CAV1 Y14	120		ATA2 Y20	SHC1 Y349	127		PIK3R2 Y464	MAPK1 Y187	236		TFRC Y20	MPZL1 Y263	174		CDK2 Y15	ALB Y164	112		EGFR Y1197	EPHB1 Y600	140
BCAR1 Y234	FYN Y420	120		CTNND1 Y228	PKP3 Y176	127		CTNND1 Y228	GRLF1 Y1105	236		EFNB2 Y304	ANXA2 Y30	174		SH2D3A Y231 S218	SHC1 Y427	112		ANXA2 Y24	EGFR Y1172	140
TFRC Y20	EPHB1 Y600	119		ANXA2 Y30	SHC1 Y349	127		SKT Y393	EPHA2 Y588 Y594	236		EFNB2 Y304	SGK223 Y413	174		PTPRA Y798	EPHA2 Y772	112		MAPK14 Y182	SHC1 Y349	140
PXN Y118	AFAP1L2 Y413	119		ANXA2 Y30	EGFR Y1092	127		MAPK3 Y204	ANXA2 Y238	236		PTPRA Y798	AFAP1L2 Y413	174		ITGB4 Y1207	DYRK1A Y321	112		AFAP1L2 Y413	PTRF Y308	139
GIT1 Y545	PTK2 Y397	119		ATA2 Y20	SKT Y393	126		ATA2 Y20	ANXA2 Y24	235		MPZL1 Y263	PTPN11 Y62	174		TNK2 Y859	PTRF Y308	112		MAPK1 T185 Y187	ENO1 Y44	139
EPHA2 Y772	GPRC5A Y347	119		EFNB2 Y304	ANXA2 Y24	126		CDK2 Y15	ANXA2 Y238	235		CRKL Y132	EGFR Y1197	173		PTRF Y308	GSK3B Y216	112		ENO1 Y44	BCAR1 Y387	139
TFRC Y20	CRKL Y132	118		SH2D3A Y231 S218	PTRF Y308	126		PTPRA Y798	AFAP1L2 Y413	235		CAV1 Y14	SHC1 Y349	173		GSK3B Y216	DYRK1A Y321	112		SKT Y393	SHB Y268	139
CRKL Y132	EGFR Y1197	118		ANXA2 Y30	SKT Y393	126		PXN Y118	CAV1 Y14	235		GPRC5A Y347	MPZL1 Y263	173		PIK3R2 Y464	ENO1 Y44	111		MAPK14 Y182	ERBB2IP Y1104	139
CRKL Y132	TNK2 Y859	118		ATA2 Y20	EGFR Y1092	125		CRKL Y132	FAM59A Y453	234		ENO1 Y44	MPZL1 Y263	172		PIK3R2 Y464	SHB Y268	111		MAPK3 Y204	MPZL1 Y263	139
STAT3 Y704	SHC1 Y349 Y350	117		TFRC Y20	PKP3 Y176	125		MAPK1 Y187	DSC3 Y818	234		LDLR Y845	MPZL1 Y263	172		CRKL Y132	DYRK1A Y321	111		ATA2 Y20	EPHA2 Y588 Y594	138
SHC1 Y349 Y350	EGFR Y1172	117		ANXA2 Y24	MAPK1 T185 Y187	125		BCAR1 Y387	ANXA2 Y238	234		RIN1 Y36	MAPK3 Y204	171		EGFR Y1172	MAPK3 Y204	111		TFRC Y20	BCAR1 Y234	138
SHC1 Y349 Y350	INPPL1 Y986	117		EGFR Y1172	ANXA2 Y30	125		PTK2 Y397	ANXA2 Y238	234		EGFR Y1172	PTRF Y308	171		PXN S84 Y88	PTPN11 Y62	110		TFRC Y20	DYRK1A Y321	138
SHC1 Y349 Y350	EGFR Y1092	117		INPPL1 Y986	PKP3 Y176	125		INSR Y1189	DYRK1A Y321	233		ITGB4 Y1207	PKP3 Y176	171		ERBB2 Y1248	DSC3 Y818	110		PTPRA Y798	EPHA2 Y588	138
SH2D3A Y231 S218	PTK2 Y397	117		ATA2 Y20	EGFR Y1172	124		INSR Y1189	EPHA2 Y588	233		CAV1 Y14	ACP1 Y132	171		SH2D3A Y231 S218	CAV1 Y14	110		ENO1 Y44	MAPK14 Y182	138
SHC1 Y349 Y350	STAT3 Y705	116		CTNND1 Y228	ANXA2 Y24	124		SHC1 Y349 Y350	EGFR Y1172	233		CAV1 Y14	ANXA2 Y238	171		PXN Y118	ANXA2 Y30	110		GSK3B Y216	PKP3 Y176	138
PXN S84 Y88	PTPN11 Y62	116		EPHA2 Y575	ITGB4 Y1207	123		SHC1 Y349 Y350	SHC1 Y349	233		BCAR3 Y266	ITGB4 Y1207	170		BCAR3 Y266	EPHA2 Y772	110		GPRC5A Y347	EGFR Y1092	138
PTPRA Y798	ENO1 Y44	116		RIN1 Y36	MPZL1 Y263	123		ITGB4 Y1207	SHB Y268	233		CAV1 Y14	LDLR Y845	170		MAPK1 T185 Y187	EPHB1 Y600	110		GPRC5A Y347	ANXA2 Y238	138
EPHB1 Y600	PTPN11 Y62	116		CAV1 Y14	SHB Y268	123		ENO1 Y44	MAPK3 Y204	232		BCAR1 Y387	INSR Y1185	170		SHC1 Y427	DSC3 Y818	110		ERBB2 Y1248	CTNND1 Y228	137
RIN1 Y36	ENO1 Y44	115		GSK3B Y216	DYRK1A Y321	123		INSR Y1189	SHB Y268	231		GSK3B Y216	PTPN11 Y62	170		INSR Y1189	STAT3 Y705	109		BCAR1 Y327	ENO1 Y44	137
PTPRA Y798	SHB Y268	115		SHC1 Y349 Y350	EGFR Y1197	122		ANXA2 Y30	LDLR Y845	231		INSR Y1189	SHC1 Y349 Y350	169		PXN S84 Y88	CDK2 Y15	109		EFNB2 Y304	ACP1 Y132	137
PIK3R2 Y464	ITGB4 Y1207	115		SHC1 Y349	STAT3 Y705	122		ATA2 Y20	ENO1 Y44	230		ERBB2 Y1248	SHC1 Y349 Y350	169		STAT3 Y704	RIN1 Y36	109		ANXA2 Y24	ENO1 Y44	137
PIK3R2 Y464	PTRF Y308	115		ATA2 Y20	MAPK1 T185 Y187	121		ERBB2 Y1248	MPZL1 Y263	227		TFRC Y20	EGFR Y1092	169		CRKL Y132	CDK2 Y15	109		PIK3R2 Y464	PTK2 Y576	136
FAM59A Y453	TNK2 Y859	115		TFRC Y20	CAV1 Y14	121		TFRC Y20	EPHA2 Y588 Y594	226		EFNB2 Y304	ANXA2 Y238	169		DSC3 Y818	GSK3B Y216	109		TFRC Y20	ERBB2IP Y1104	136
ATA2 Y20	GRLF1 Y1105	115		EPHA2 Y575	MPZL1 Y263	121		SGK223 Y413	GSK3B Y216	226		CDK2 Y15	INSR Y1185	169		PRPF4B Y849	DYRK1A Y321	109		CTNND1 Y228	ANXA2 Y30	136
TNK2 Y859	GRLF1 Y1105	114		FAM59A Y453	CAV1 Y14	121		EPHA2 Y575	ALB Y164	225		DSC3 Y818	GSK3B Y216	169		EPHA2 Y588 Y594	LDLR Y845	109		INSR Y1185	MPZL1 Y263	136
SHC1 Y349 Y350	PTRF Y308	114		MAPK1 T185 Y187	ANXA2 Y30	121		FAM59A Y453	SHC1 Y349	225		BCAR1 Y387	EPHB1 Y600	169		INSR Y1185	STAT3 Y705	109		EPHA2 Y588	GPRC5A Y347	136
SH2D3A Y231 S218	PTPRA Y798	114		MAPK1 T185 Y187	DSC3 Y818	121		CTNND1 Y228	ACP1 Y132	225		BCAR3 Y266	ACP1 Y132	168		INSR Y1189	STAT3 Y704	108		INSR Y1189	SGK223 Y413	135
FAM59A Y453	ACP1 Y132	114		STAT3 Y704	SKT Y393	120		MAPK1 T185 Y187	INSR Y1185	224		PIK3R2 Y464	CAV1 Y14	167		STAT3 Y704	INSR Y1185	108		PXN S84 Y88	ANXA2 Y24	135
EPHB1 Y600	LDLR Y845	114		CRKL Y132	EGFR Y1197	120		ENO1 Y44	DYRK1A Y321	224		PXN Y118	GSK3B Y216	167		SHC1 Y349 Y350	PKP3 Y176	108		EFNB2 Y304	GPRC5A Y347	135
EFNB2 Y304	EPHA2 Y588 Y594	114		CRKL Y132	ACP1 Y132	120		ATA2 Y20	PTRF Y308	223		BCAR3 Y266	GSK3B Y216	167		PXN Y118	MAPK1 T185 Y187	108		BCAR1 Y234	ENO1 Y44	135
CTNND1 Y228	EPHB1 Y600	114		CRKL Y132	SHB Y268	120		ERBB2 Y1248	EPHA2 Y588	223		SHC1 Y427	MAPK3 Y204	167		RIN1 Y36	STAT3 Y705	108		FAM59A Y453	ANXA2 Y30	135
CRKL Y132	DYRK1A Y321	114		FAM59A Y453	ERBB2IP Y1104	120		PTPRA Y798	GRLF1 Y1105	223		ITGB4 Y1207	CAV1 Y14	167		ANXA2 Y30	GPRC5A Y347	108		SHC1 Y349	PTRF Y308	135
PXN Y118	GPRC5A Y347	113		PKP3 Y176	EGFR Y1092	120		BCAR1 Y234	ACP1 Y132	222		DSC3 Y818	SGK223 Y413	167		ENO1 Y44	PTK2 Y576	108		ERBB2 Y1248	ACP1 Y132	134
PTPRA Y798	GSK3B Y216	113		TFRC Y20	TNK2 Y859	118		EPHA2 Y588 Y594	FYN Y420	222		GRLF1 Y1105	EPHA2 Y588	167		CDK2 Y15	PRPF4B Y849	107		EFNB2 Y304	EPHA2 Y588 Y594	134
PIK3R2 Y464	GIT1 Y545	113		TNK2 Y859	SHB Y268	118		CDK2 Y15	DYRK1A Y321	221		MAPK3 Y204	BCAR1 Y249	167		EPHA2 Y575	BCAR1 Y249	107		AFAP1L2 Y413	ITGB4 Y1207	134
INSR Y1185	PTK2 Y576	113		EPHA2 Y575	ACP1 Y132	117		PTPRA Y798	ITGB4 Y1207	221		PTRF Y308	EGFR Y1092	167		EGFR Y1197	FAM59A Y453	107		DSC3 Y818	INSR Y1185	134
GRLF1 Y1105	ACP1 Y132	113		FAM59A Y453	TNK2 Y859	117		BCAR3 Y266	BCAR1 Y387	221		SH2D3A Y231 S218	BCAR1 Y249	166		TNK2 Y859	SHC1 Y349	107		FYN Y420	BCAR1 Y249	134
EPHA2 Y772	PTK2 Y397	113		PTPRA Y798	EPHA2 Y588	117		SGK223 Y413	PRPF4B Y849	221		BCAR3 Y266	PRPF4B Y849	166		PTPN11 Y62	PTK2 Y576	107		GIT1 Y545	GSK3B Y216	133
ANXA2 Y24	ENO1 Y44	113		PTRF Y308	GPRC5A Y347	117		ATA2 Y20	SHC1 Y349 Y350	220		ANXA2 Y30	ITGB4 Y1207	166		CDK2 Y15	GSK3B Y216	106		MAPK1 T185 Y187	BCAR1 Y249	133
SKT Y393	SHB Y268	112		ATA2 Y20	CTNND1 Y228	116		SHC1 Y349 Y350	MAPK3 Y204	220		EPHB1 Y600	DYRK1A Y321	166		SKT Y393	SHB Y268	106		GSK3B Y216	GPRC5A Y347	133
ERBB2 Y1248	EPHA2 Y575	112		CRKL Y132	FAM59A Y453	116		FAM59A Y453	GPRC5A Y347	220		CRKL Y132	SHB Y268	165		ATA2 Y20	GPRC5A Y347	105		SHC1 Y349 Y350	EPHA2 Y588 Y594	132
STAT3 Y704	ANXA2 Y30	111		EPHA2 Y575	GSK3B Y216	116		ERBB2IP Y1104	ALB Y164	220		AFAP1L2 Y413	DYRK1A Y321	165		INSR Y1189	GPRC5A Y347	105		AFAP1L2 Y413	ACP1 Y132	132
PXN S84 Y88	LDLR Y845	111		CTNND1 Y228	ANXA2 Y30	116		AFAP1L2 Y413	MPZL1 Y263	219		SHC1 Y349	PTRF Y308	165		SH2D3A Y231 S218	MAPK3 Y204	105		RIN1 Y36	DSC3 Y818	132
INSR Y1189	PTK2 Y576	111		SHB Y268	ERBB2IP Y1104	116		SGK223 Y413	PTPN11 Y62	219		GSK3B Y216	EGFR Y1092	165		INSR Y1185	GPRC5A Y347	105		EGFR Y1172	TNK2 Y859	132
INPPL1 Y986	GRLF1 Y1105	111		CTNND1 Y228	SHC1 Y427	115		SHC1 Y349 Y350	PKP3 Y176	218		INSR Y1189	EFNB2 Y304	164		PXN S84 Y88	MAPK1 T185 Y187	104		SGK223 Y413	EPHA2 Y588 Y594	132
RIN1 Y36	GRLF1 Y1105	110		ITGB4 Y1207	DYRK1A Y321	115		CAV1 Y14	PTK2 Y576	218		EFNB2 Y304	PRPF4B Y849	164		ERBB2 Y1248	TNK2 Y859	104		EPHA2 Y588 Y594	ANXA2 Y238	132
PTRF Y308	PKP3 Y176	110		PTRF Y308	ANXA2 Y238	115		GRLF1 Y1105	SHB Y268	218		CAV1 Y14	PTRF Y308	164		TFRC Y20	PTK2 Y397	104		GPRC5A Y347	ACP1 Y132	132
PIK3R2 Y464	DYRK1A Y321	110		SH2D3A Y231 S218	MAPK1 T185 Y187	114		EPHB1 Y600	ALB Y164	218		CAV1 Y14	GSK3B Y216	164		SH2D3A Y231 S218	PRPF4B Y849	104		ACP1 Y132	PTK2 Y576	132
PIK3R2 Y464	SHB Y268	110		SH2D3A Y231 S218	ACP1 Y132	114		PXN S84 Y88	ALB Y164	217		ACP1 Y132	MPZL1 Y263	164		FAM59A Y453	TNK2 Y859	104		FAM59A Y453	PTRF Y308	131
ITGB4 Y1207	GRLF1 Y1105	110		PXN S84 Y88	EPHA2 Y772	113		FAM59A Y453	PKP3 Y176	217		PIK3R2 Y464	EFNB2 Y304	163		INPPL1 Y986	MAPK3 Y204	104		ANXA2 Y24	MAPK14 Y182	131
CRKL Y132	EGFR Y1172	110		CRKL Y132	ENO1 Y44	113		EPHA2 Y588	FYN Y420	217		BCAR3 Y266	PTRF Y308	163		MAPK3 Y204	EGFR Y1092	104		DSC3 Y818	EGFR Y1092	131
CRKL Y132	EGFR Y1092	110		EPHA2 Y575	ENO1 Y44	113		PTPRA Y798	INPPL1 Y986	216		MAPK1 T185 Y187	SHC1 Y427	163		ERBB2 Y1248	SHC1 Y427	103		SHC1 Y349	PKP3 Y176	131
ANXA2 Y30	STAT3 Y705	110		ANXA2 Y24	INPPL1 Y986	113		PTPRA Y798	EGFR Y1092	216		ANXA2 Y30	DYRK1A Y321	163		SH2D3A Y231 S218	GRLF1 Y1105	103		PTPRA Y798	LDLR Y845	130
AFAP1L2 Y413	ALB Y164	110		EGFR Y1172	PKP3 Y176	113		MAPK1 Y187	ANXA2 Y238	215		INSR Y1185	PTPN11 Y62	163		GIT1 Y545	PTK2 Y576	103		RIN1 Y36	SHC1 Y427	130
SKT Y393	ALB Y164	109		TFRC Y20	ERBB2IP Y1104	112		MAPK1 T185 Y187	GRLF1 Y1105	215		LDLR Y845	EGFR Y1092	163		CAV1 Y14	PTRF Y308	102		ITGB4 Y1207	TNK2 Y859	130
ERBB2 Y1248	EPHA2 Y588 Y594	109		SH2D3A Y231 S218	EPHA2 Y575	112		EPHA2 Y772	ACP1 Y132	215		INSR Y1189	BCAR1 Y327	162		SHB Y268	PTPN11 Y62	102		DSC3 Y818	BCAR1 Y249	130
EGFR Y1172	GRLF1 Y1105	109		ANXA2 Y24	EGFR Y1172	112		GSK3B Y216	ANXA2 Y238	215		SHC1 Y349 Y350	MAPK14 Y182	162		CDK2 Y15	AFAP1L2 Y413	101		FYN Y420	ALB Y164	130
EFNB2 Y304	SHB Y268	109		MAPK1 Y187	ITGB4 Y1207	112		EPHA2 Y588	PTK2 Y397	215		EFNB2 Y304	GSK3B Y216	162		GIT1 Y545	EPHA2 Y772	101		ATA2 Y20	GSK3B Y216	129
CTNND1 Y228	ENO1 Y44	109		MAPK3 Y204	EPHA2 Y588	112		ATA2 Y20	MAPK3 Y204	214		CTNND1 Y228	EPHA2 Y588	162		ANXA2 Y30	ERBB2IP Y1104	100		TFRC Y20	BCAR3 Y266	129
CRKL Y132	EFNB2 Y304	109		CDK2 Y15	ITGB4 Y1207	111		PIK3R2 Y464	MPZL1 Y263	214		RIN1 Y36	MAPK1 Y187	162		INPPL1 Y986	PKP3 Y176	100		CRKL Y132	SHC1 Y349 Y350	129
CDK2 Y15	PTRF Y308	109		CRKL Y132	SHC1 Y427	110		DSC3 Y818	MPZL1 Y263	214		EGFR Y1172	CAV1 Y14	162		PKP3 Y176	EGFR Y1092	100		PTPRA Y798	ANXA2 Y238	129
ATA2 Y20	CTNND1 Y228	109		CRKL Y132	GRLF1 Y1105	110		ATA2 Y20	ANXA2 Y238	213		PRPF4B Y849	PTRF Y308	162		INSR Y1189	PKP3 Y176	99		AFAP1L2 Y413	ERBB2IP Y1104	129
AFAP1L2 Y413	ENO1 Y44	109		EFNB2 Y304	DYRK1A Y321	110		CDK2 Y15	SGK223 Y413	213		BCAR1 Y327	CDK2 Y15	161		PXN S84 Y88	PXN Y118	99		RIN1 Y36	SGK223 Y413	129
SHC1 Y349	PTRF Y308	108		SKT Y393	STAT3 Y705	110		EPHA2 Y575	ACP1 Y132	213		EGFR Y1197	PTRF Y308	161		CRKL Y132	ERBB2IP Y1104	99		RIN1 Y36	SHC1 Y349	129
SH2D3A Y231 S218	ACP1 Y132	108		SGK223 Y413	GSK3B Y216	110		FAM59A Y453	EGFR Y1172	213		CTNND1 Y228	PKP3 Y176	161		CTNND1 Y228	PXN Y118	99		ENO1 Y44	ERBB2IP Y1104	129
GRLF1 Y1105	EGFR Y1092	108		TFRC Y20	LDLR Y845	109		FAM59A Y453	SHC1 Y427	213		AFAP1L2 Y413	PRPF4B Y849	161		BCAR3 Y266	BCAR1 Y387	99		ENO1 Y44	ANXA2 Y238	129
PXN S84 Y88	SH2D3A Y231 S218	107		EFNB2 Y304	RIN1 Y36	109		CTNND1 Y228	INSR Y1185	213		RIN1 Y36	GPRC5A Y347	161		SHC1 Y427	PTRF Y308	99		PXN S84 Y88	EFNB2 Y304	128
ERBB2 Y1248	EPHA2 Y588	107		SH2D3A Y231 S218	PRPF4B Y849	109		AFAP1L2 Y413	MAPK1 Y187	213		MAPK1 Y187	SHC1 Y427	161		ENO1 Y44	CAV1 Y14	99		TFRC Y20	MPZL1 Y263	128
CRKL Y132	INPPL1 Y986	107		RIN1 Y36	LDLR Y845	109		STAT3 Y704	MAPK1 Y187	212		EGFR Y1172	MPZL1 Y263	161		INSR Y1185	PKP3 Y176	99		EFNB2 Y304	TNK2 Y859	128
CDK2 Y15	EPHA2 Y772	107		ANXA2 Y24	EGFR Y1092	109		SKT Y393	ALB Y164	212		ANXA2 Y30	PTPN11 Y62	161		PTK2 Y397	PTK2 Y576	99		ANXA2 Y24	PRPF4B Y849	128
ATA2 Y20	MPZL1 Y263	107		PXN S84 Y88	AFAP1L2 Y413	108		SH2D3A Y231 S218	FAM59A Y453	211		ITGB4 Y1207	EGFR Y1092	161		ATA2 Y20	SHC1 Y349 Y350	98		ANXA2 Y30	PRPF4B Y849	128
SHC1 Y427	PTRF Y308	106		SH2D3A Y231 S218	ENO1 Y44	108		SH2D3A Y231 S218	MAPK1 Y187	211		ATA2 Y20	GPRC5A Y347	160		BCAR1 Y327	BCAR1 Y234	98		TFRC Y20	BCAR1 Y249	127
SHB Y268	ERBB2IP Y1104	106		ANXA2 Y24	SHC1 Y349	108		ERBB2 Y1248	ANXA2 Y238	209		PXN S84 Y88	ERBB2 Y1248	160		CTNND1 Y228	TNK2 Y859	98		PTPRA Y798	FYN Y420	127
PXN S84 Y88	ERBB2IP Y1104	106		PXN S84 Y88	CRKL Y132	107		ITGB4 Y1207	PKP3 Y176	209		CTNND1 Y228	SKT Y393	160		PRPF4B Y849	PTRF Y308	98		PXN S84 Y88	ERBB2IP Y1104	126
EFNB2 Y304	EPHA2 Y575	106		STAT3 Y704	INPPL1 Y986	107		ERBB2 Y1248	SHB Y268	208		SHC1 Y427	SHC1 Y349	160		INSR Y1189	DSC3 Y818	97		CTNND1 Y228	RIN1 Y36	126
CRKL Y132	EPHB1 Y600	106		PXN S84 Y88	GIT1 Y545	106		PTK2 Y397	SHB Y268	208		DSC3 Y818	MPZL1 Y263	160		SHC1 Y349 Y350	ACP1 Y132	97		GSK3B Y216	SHB Y268	126
PXN Y118	MAPK14 Y182	105		STAT3 Y704	CTNND1 Y228	106		PXN S84 Y88	ANXA2 Y30	207		PRPF4B Y849	PTK2 Y397	160		AFAP1L2 Y413	DYRK1A Y321	97		DYRK1A Y321	PTK2 Y397	126
GIT1 Y545	ENO1 Y44	105		STAT3 Y704	EGFR Y1172	106		PTPRA Y798	PTPN11 Y62	207		GRLF1 Y1105	PKP3 Y176	160		DSC3 Y818	INSR Y1185	97		ATA2 Y20	PKP3 Y176	125
FAM59A Y453	MAPK14 Y182	105		CRKL Y132	ANXA2 Y24	106		CRKL Y132	PXN Y118	206		DYRK1A Y321	PTK2 Y397	160		ERBB2 Y1248	ANXA2 Y24	96		CRKL Y132	SKT Y393	125
DYRK1A Y321	ERBB2IP Y1104	105		SH2D3A Y231 S218	PTK2 Y397	106		GIT1 Y545	ANXA2 Y238	206		INSR Y1189	PTK2 Y576	159		PIK3R2 Y464	LDLR Y845	96		CTNND1 Y228	ACP1 Y132	125
PIK3R2 Y464	EPHB1 Y600	104		PIK3R2 Y464	PTRF Y308	105		FAM59A Y453	MAPK3 Y204	206		BCAR1 Y327	ITGB4 Y1207	159		CTNND1 Y228	SHC1 Y427	96		PTPRA Y798	RIN1 Y36	125
MAPK1 T185 Y187	DSC3 Y818	104		TFRC Y20	EFNB2 Y304	105		MAPK1 Y187	ENO1 Y44	206		BCAR1 Y327	SGK223 Y413	159		PXN Y118	SHC1 Y349	96		ANXA2 Y24	MAPK1 T185 Y187	125
STAT3 Y704	GRLF1 Y1105	103		AFAP1L2 Y413	GSK3B Y216	105		PRPF4B Y849	ANXA2 Y238	206		MAPK1 Y187	BCAR1 Y249	159		EGFR Y1172	PKP3 Y176	96		ANXA2 Y24	SKT Y393	125
PXN S84 Y88	EPHA2 Y772	103		RIN1 Y36	EGFR Y1172	105		DYRK1A Y321	PTPN11 Y62	206		SKT Y393	GRLF1 Y1105	159		PRPF4B Y849	PKP3 Y176	96		CRKL Y132	GSK3B Y216	124
PIK3R2 Y464	GRLF1 Y1105	103		RIN1 Y36	MAPK1 T185 Y187	105		PXN S84 Y88	EPHA2 Y588 Y594	205		STAT3 Y704	EGFR Y1197	158		EPHA2 Y575	FYN Y420	95		GIT1 Y545	LDLR Y845	124
GRLF1 Y1105	STAT3 Y705	103		SHC1 Y349	PKP3 Y176	105		SHC1 Y349 Y350	MAPK1 Y187	205		PIK3R2 Y464	EGFR Y1092	158		DSC3 Y818	MAPK3 Y204	95		FAM59A Y453	CTNND1 Y228	124
ENO1 Y44	SGK223 Y413	103		CRKL Y132	DYRK1A Y321	104		CTNND1 Y228	ITGB4 Y1207	204		TFRC Y20	ANXA2 Y30	158		PTRF Y308	PKP3 Y176	95		PTPRA Y798	MPZL1 Y263	124
ENO1 Y44	PKP3 Y176	103		EGFR Y1197	DSC3 Y818	104		PTRF Y308	PTK2 Y576	204		CDK2 Y15	ANXA2 Y238	158		ERBB2 Y1248	ENO1 Y44	94		MAPK1 T185 Y187	SKT Y393	124
DSC3 Y818	MPZL1 Y263	103		EGFR Y1197	DYRK1A Y321	104		ATA2 Y20	RIN1 Y36	203		ANXA2 Y30	PTRF Y308	158		PIK3R2 Y464	PRPF4B Y849	94		MAPK1 T185 Y187	MAPK14 Y182	124
PXN Y118	PTK2 Y576	102		EPHA2 Y772	PTPN11 Y62	104		CRKL Y132	ENO1 Y44	203		RIN1 Y36	ANXA2 Y30	157		SH2D3A Y231 S218	INPPL1 Y986	94		FYN Y420	SHB Y268	124
MAPK1 T185 Y187	PTRF Y308	102		STAT3 Y704	EGFR Y1092	103		CAV1 Y14	ANXA2 Y238	203		INSR Y1185	BCAR1 Y249	157		SH2D3A Y231 S218	EGFR Y1092	94		ATA2 Y20	PRPF4B Y849	123
GRLF1 Y1105	GPRC5A Y347	102		ERBB2 Y1248	ERBB2IP Y1104	103		SHC1 Y349 Y350	PTRF Y308	202		PKP3 Y176	MPZL1 Y263	157		ERBB2IP Y1104	ANXA2 Y238	94		PXN S84 Y88	MAPK14 Y182	123
FYN Y420	ALB Y164	102		EPHA2 Y575	ANXA2 Y238	103		CDK2 Y15	ANXA2 Y30	202		PTK2 Y397	PTPN11 Y62	157		PXN S84 Y88	CRKL Y132	93		SH2D3A Y231 S218	SGK223 Y413	123
EPHA2 Y772	EPHB1 Y600	102		EGFR Y1172	GRLF1 Y1105	103		SH2D3A Y231 S218	PTPRA Y798	202		EGFR Y1092	ANXA2 Y238	157		PIK3R2 Y464	MAPK1 Y187	93		GIT1 Y545	SHB Y268	123
CTNND1 Y228	DYRK1A Y321	102		INPPL1 Y986	GRLF1 Y1105	103		ANXA2 Y24	PTK2 Y576	202		ATA2 Y20	BCAR1 Y234	156		SHC1 Y349 Y350	ANXA2 Y24	93		FAM59A Y453	MAPK1 T185 Y187	123
AFAP1L2 Y413	FYN Y420	102		GRLF1 Y1105	EGFR Y1092	103		ENO1 Y44	PTPN11 Y62	201		INSR Y1189	PXN S84 Y88	156		CDK2 Y15	PTK2 Y397	93		PTPRA Y798	BCAR3 Y266	123
EGFR Y1197	GRLF1 Y1105	101		MAPK3 Y204	ACP1 Y132	103		EGFR Y1197	FAM59A Y453	200		STAT3 Y704	ACP1 Y132	156		PXN Y118	LDLR Y845	93		AFAP1L2 Y413	DSC3 Y818	123
ANXA2 Y30	MPZL1 Y263	101		CDK2 Y15	SGK223 Y413	102		FYN Y420	ALB Y164	200		ITGB4 Y1207	PTK2 Y397	156		RIN1 Y36	MPZL1 Y263	93		MAPK1 Y187	SHC1 Y349	123
STAT3 Y704	ENO1 Y44	100		EGFR Y1197	SHC1 Y427	102		BCAR1 Y234	ALB Y164	199		DSC3 Y818	EGFR Y1092	156		INPPL1 Y986	STAT3 Y705	93		SGK223 Y413	PRPF4B Y849	123
PIK3R2 Y464	CRKL Y132	100		ENO1 Y44	PTK2 Y397	102		SHC1 Y349 Y350	EGFR Y1197	198		ATA2 Y20	BCAR3 Y266	155		MAPK3 Y204	MPZL1 Y263	93		MPZL1 Y263	PTPN11 Y62	123
PIK3R2 Y464	EFNB2 Y304	100		ACP1 Y132	PTPN11 Y62	102		DYRK1A Y321	PTK2 Y397	198		PXN S84 Y88	SHC1 Y349 Y350	155		STAT3 Y705	EGFR Y1092	93		ATA2 Y20	PTRF Y308	122
PIK3R2 Y464	EPHA2 Y772	100		PXN S84 Y88	EFNB2 Y304	101		PIK3R2 Y464	LDLR Y845	196		ERBB2 Y1248	BCAR1 Y249	155		STAT3 Y704	INPPL1 Y986	92		TFRC Y20	SKT Y393	122
ENO1 Y44	STAT3 Y705	100		CRKL Y132	ANXA2 Y30	101		SHC1 Y349 Y350	CAV1 Y14	196		CDK2 Y15	EGFR Y1197	155		STAT3 Y704	EGFR Y1092	92		CTNND1 Y228	MAPK1 T185 Y187	122
CRKL Y132	ALB Y164	100		EFNB2 Y304	SH2D3A Y231 S218	101		PTPRA Y798	TNK2 Y859	196		PXN Y118	MAPK1 T185 Y187	155		PIK3R2 Y464	CTNND1 Y228	92		PXN Y118	MPZL1 Y263	122
TFRC Y20	SHC1 Y349 Y350	99		RIN1 Y36	INPPL1 Y986	101		PTPRA Y798	DYRK1A Y321	196		ANXA2 Y30	LDLR Y845	155		PIK3R2 Y464	MAPK3 Y204	92		MAPK1 T185 Y187	INSR Y1185	122
PXN S84 Y88	FAM59A Y453	99		RIN1 Y36	EGFR Y1092	101		AFAP1L2 Y413	LDLR Y845	196		BCAR1 Y327	PIK3R2 Y464	154		CRKL Y132	PTK2 Y576	92		SHB Y268	PTPN11 Y62	122
PXN S84 Y88	ANXA2 Y238	99		ENO1 Y44	MAPK3 Y204	101		MAPK1 Y187	TNK2 Y859	196		CDK2 Y15	TNK2 Y859	154		CDK2 Y15	SGK223 Y413	92		ATA2 Y20	MAPK14 Y182	121
PIK3R2 Y464	MAPK1 Y187	99		SKT Y393	ERBB2IP Y1104	101		DSC3 Y818	LDLR Y845	196		AFAP1L2 Y413	EPHA2 Y588 Y594	154		SH2D3A Y231 S218	EGFR Y1172	92		EFNB2 Y304	GSK3B Y216	121
PIK3R2 Y464	MAPK3 Y204	99		MAPK14 Y182	EPHA2 Y588	101		BCAR1 Y387	DYRK1A Y321	196		RIN1 Y36	MAPK1 T185 Y187	153		FAM59A Y453	ANXA2 Y30	92		AFAP1L2 Y413	GSK3B Y216	121
ITGB4 Y1207	ACP1 Y132	99		ATA2 Y20	CRKL Y132	100		LDLR Y845	MPZL1 Y263	195		EPHA2 Y772	DYRK1A Y321	153		FAM59A Y453	LDLR Y845	92		BCAR1 Y327	PTRF Y308	120
SKT Y393	GRLF1 Y1105	98		INSR Y1189	ERBB2 Y1248	100		INSR Y1189	GRLF1 Y1105	194		TNK2 Y859	EGFR Y1092	153		CTNND1 Y228	ITGB4 Y1207	92		PIK3R2 Y464	BCAR1 Y249	120
PXN S84 Y88	ENO1 Y44	98		EFNB2 Y304	GSK3B Y216	100		STAT3 Y704	PTPRA Y798	194		BCAR1 Y327	ANXA2 Y238	152		EGFR Y1172	STAT3 Y705	92		TFRC Y20	MAPK14 Y182	120
PXN S84 Y88	GPRC5A Y347	98		SH2D3A Y231 S218	EPHA2 Y772	100		SHC1 Y349 Y350	DYRK1A Y321	194		ANXA2 Y30	DSC3 Y818	152		EPHB1 Y600	BCAR1 Y249	92		SHC1 Y349 Y350	GSK3B Y216	120
GIT1 Y545	EPHA2 Y772	98		FAM59A Y453	EPHA2 Y588 Y594	100		EFNB2 Y304	ENO1 Y44	194		EPHB1 Y600	ERBB2IP Y1104	152		GPRC5A Y347	ACP1 Y132	92		GIT1 Y545	ANXA2 Y238	120
GIT1 Y545	FYN Y420	98		CTNND1 Y228	ERBB2IP Y1104	100		CDK2 Y15	PTPRA Y798	194		STAT3 Y705	ACP1 Y132	152		INSR Y1189	ANXA2 Y24	91		INPPL1 Y986	FYN Y420	120
EPHA2 Y772	PRPF4B Y849	98		INPPL1 Y986	ERBB2IP Y1104	100		ATA2 Y20	PXN Y118	193		INSR Y1189	MPZL1 Y263	151		STAT3 Y704	EGFR Y1172	91		EPHA2 Y588 Y594	ERBB2IP Y1104	120
SHC1 Y427	ENO1 Y44	97		GSK3B Y216	ALB Y164	100		ERBB2 Y1248	DYRK1A Y321	193		BCAR1 Y327	TFRC Y20	151		RIN1 Y36	PTRF Y308	91		GIT1 Y545	EPHA2 Y588	119
PIK3R2 Y464	MPZL1 Y263	97		GPRC5A Y347	PTPN11 Y62	100		CDK2 Y15	ENO1 Y44	192		SHC1 Y349 Y350	EGFR Y1092	151		ANXA2 Y24	INSR Y1185	91		ANXA2 Y24	SGK223 Y413	119
PIK3R2 Y464	ALB Y164	97		ACP1 Y132	PTK2 Y397	100		AFAP1L2 Y413	EPHA2 Y588	192		PRPF4B Y849	FYN Y420	151		ITGB4 Y1207	SHC1 Y349	91		EPHA2 Y772	GRLF1 Y1105	119
GRLF1 Y1105	SHB Y268	97		MAPK14 Y182	ALB Y164	99		MAPK1 Y187	STAT3 Y705	192		INSR Y1189	BCAR1 Y249	150		CAV1 Y14	SHC1 Y349	91		BCAR1 Y387	PTRF Y308	119
EPHB1 Y600	SHB Y268	97		CDK2 Y15	GSK3B Y216	98		ENO1 Y44	BCAR1 Y387	192		BCAR1 Y327	ACP1 Y132	150		DYRK1A Y321	PTK2 Y397	91		ACP1 Y132	PTPN11 Y62	119
EGFR Y1197	FAM59A Y453	97		ENO1 Y44	PTPN11 Y62	98		LDLR Y845	PTK2 Y397	192		EGFR Y1197	CAV1 Y14	150		PKP3 Y176	ERBB2IP Y1104	91		PXN S84 Y88	SKT Y393	118
CRKL Y132	GPRC5A Y347	97		PIK3R2 Y464	CRKL Y132	97		CRKL Y132	MAPK1 T185 Y187	191		MAPK1 T185 Y187	MAPK14 Y182	150		BCAR1 Y327	EPHA2 Y772	90		CRKL Y132	PRPF4B Y849	118
SHC1 Y349 Y350	ITGB4 Y1207	96		TFRC Y20	EGFR Y1172	97		SKT Y393	EPHA2 Y588	191		SKT Y393	ERBB2IP Y1104	150		SHC1 Y349 Y350	SHC1 Y427	90		BCAR1 Y234	FYN Y420	118
SGK223 Y413	FYN Y420	96		TFRC Y20	MAPK1 T185 Y187	97		GRLF1 Y1105	PTK2 Y576	191		EGFR Y1092	PTPN11 Y62	150		EFNB2 Y304	BCAR1 Y249	90		CTNND1 Y228	PTK2 Y576	118
FAM59A Y453	GRLF1 Y1105	96		EFNB2 Y304	SKT Y393	97		STAT3 Y704	MAPK3 Y204	190		GIT1 Y545	BCAR1 Y387	149		ANXA2 Y24	MAPK3 Y204	90		EPHB1 Y600	SHB Y268	118
EPHA2 Y588 Y594	EPHB1 Y600	96		SH2D3A Y231 S218	ITGB4 Y1207	97		TFRC Y20	BCAR3 Y266	190		EGFR Y1197	STAT3 Y705	149		CAV1 Y14	MPZL1 Y263	90		PXN S84 Y88	CTNND1 Y228	117
ENO1 Y44	SHC1 Y349	96		GIT1 Y545	GSK3B Y216	97		EFNB2 Y304	PTPRA Y798	190		PTPRA Y798	SKT Y393	149		ATA2 Y20	INSR Y1189	89		SHC1 Y349 Y350	GIT1 Y545	117
CTNND1 Y228	SHC1 Y427	96		EGFR Y1172	STAT3 Y705	97		EFNB2 Y304	DYRK1A Y321	190		INSR Y1185	FYN Y420	149		ATA2 Y20	INSR Y1185	89		SH2D3A Y231 S218	MAPK1 T185 Y187	117
CTNND1 Y228	CAV1 Y14	96		MAPK1 T185 Y187	DYRK1A Y321	97		FAM59A Y453	AFAP1L2 Y413	190		PTK2 Y397	ANXA2 Y238	149		PXN S84 Y88	DYRK1A Y321	89		PXN Y118	DSC3 Y818	117
CRKL Y132	SKT Y393	96		INPPL1 Y986	STAT3 Y705	97		MAPK1 T185 Y187	PTK2 Y397	190		PXN S84 Y88	GPRC5A Y347	148		PIK3R2 Y464	GRLF1 Y1105	89		ANXA2 Y24	DYRK1A Y321	117
SH2D3A Y231 S218	ENO1 Y44	95		EPHA2 Y588 Y594	SHB Y268	97		DSC3 Y818	EPHA2 Y588	190		CRKL Y132	INSR Y1185	148		PIK3R2 Y464	SHC1 Y349	89		MAPK1 Y187	EGFR Y1172	117
PTPRA Y798	PTPN11 Y62	95		PXN S84 Y88	PRPF4B Y849	96		ATA2 Y20	MAPK1 Y187	189		SH2D3A Y231 S218	GPRC5A Y347	148		GIT1 Y545	ACP1 Y132	89		TNK2 Y859	PTPN11 Y62	117
ERBB2 Y1248	SHB Y268	95		ERBB2 Y1248	EPHB1 Y600	96		TFRC Y20	ANXA2 Y30	189		TNK2 Y859	PTRF Y308	148		PXN Y118	PTK2 Y397	89		CRKL Y132	TNK2 Y859	116
EPHA2 Y772	PTRF Y308	95		EGFR Y1197	ANXA2 Y30	96		SH2D3A Y231 S218	PTK2 Y576	189		BCAR1 Y387	FYN Y420	148		RIN1 Y36	SHC1 Y349	89		CRKL Y132	DYRK1A Y321	116
ENO1 Y44	ACP1 Y132	95		CTNND1 Y228	STAT3 Y705	96		PXN Y118	PTRF Y308	189		EPHB1 Y600	FYN Y420	148		MAPK1 T185 Y187	ITGB4 Y1207	89		CDK2 Y15	GIT1 Y545	116
CTNND1 Y228	ALB Y164	95		ITGB4 Y1207	EPHA2 Y588 Y594	96		RIN1 Y36	PTK2 Y576	189		ATA2 Y20	PRPF4B Y849	147		PRPF4B Y849	BCAR1 Y387	89		CTNND1 Y228	SKT Y393	116
CAV1 Y14	MPZL1 Y263	95		SGK223 Y413	MAPK14 Y182	96		ERBB2 Y1248	INPPL1 Y986	188		INSR Y1189	PTRF Y308	147		GRLF1 Y1105	GSK3B Y216	89		CTNND1 Y228	DYRK1A Y321	116
BCAR1 Y387	PTK2 Y397	95		MAPK14 Y182	PTRF Y308	96		ERBB2 Y1248	EGFR Y1092	188		STAT3 Y704	EGFR Y1172	147		GSK3B Y216	FYN Y420	89		ENO1 Y44	LDLR Y845	116
BCAR1 Y327	PTK2 Y397	95		ATA2 Y20	EGFR Y1197	95		EFNB2 Y304	ERBB2IP Y1104	188		BCAR3 Y266	DYRK1A Y321	147		GPRC5A Y347	ERBB2IP Y1104	89		SGK223 Y413	EPHB1 Y600	116
SHC1 Y349 Y350	ACP1 Y132	94		ERBB2 Y1248	INSR Y1185	95		AFAP1L2 Y413	SHB Y268	188		EPHA2 Y588 Y594	GRLF1 Y1105	147		LDLR Y845	PTPN11 Y62	89		PRPF4B Y849	PTRF Y308	116
GIT1 Y545	GPRC5A Y347	94		CRKL Y132	MAPK14 Y182	95		EPHB1 Y600	EPHA2 Y588	188		ATA2 Y20	SHC1 Y349 Y350	146		ACP1 Y132	PTPN11 Y62	89		STAT3 Y704	DSC3 Y818	115
EGFR Y1197	MPZL1 Y263	94		SH2D3A Y231 S218	PTPRA Y798	95		PIK3R2 Y464	EPHA2 Y588	187		BCAR1 Y327	LDLR Y845	146		INSR Y1189	PRPF4B Y849	88		BCAR1 Y327	FYN Y420	115
ATA2 Y20	MAPK1 T185 Y187	94		PTPRA Y798	PTRF Y308	95		PTPRA Y798	BCAR1 Y387	187		TFRC Y20	INSR Y1185	146		FAM59A Y453	EGFR Y1172	88		PIK3R2 Y464	SHB Y268	115
TNK2 Y859	MPZL1 Y263	93		MAPK1 Y187	MAPK14 Y182	95		FAM59A Y453	MAPK1 Y187	186		PXN Y118	SHC1 Y427	146		ANXA2 Y30	ITGB4 Y1207	88		EGFR Y1197	CAV1 Y14	115
TFRC Y20	FAM59A Y453	93		MAPK1 Y187	GSK3B Y216	95		PTPRA Y798	CAV1 Y14	186		PXN S84 Y88	ENO1 Y44	145		ITGB4 Y1207	BCAR1 Y387	88		ANXA2 Y24	SHC1 Y349	115
TFRC Y20	SHC1 Y349	93		EPHA2 Y588 Y594	GSK3B Y216	95		PXN Y118	MAPK1 Y187	186		PXN S84 Y88	PTRF Y308	145		PRPF4B Y849	INSR Y1185	88		ENO1 Y44	BCAR1 Y249	115
TFRC Y20	MPZL1 Y263	93		GRLF1 Y1105	MPZL1 Y263	95		MAPK3 Y204	PTK2 Y397	186		ERBB2 Y1248	EGFR Y1197	145		INSR Y1189	GSK3B Y216	87		DSC3 Y818	ANXA2 Y238	115
ITGB4 Y1207	DYRK1A Y321	93		ERBB2IP Y1104	EGFR Y1092	95		DYRK1A Y321	PTK2 Y576	186		TFRC Y20	PTK2 Y397	145		EGFR Y1197	PKP3 Y176	87		BCAR1 Y387	FYN Y420	115
SHC1 Y349 Y350	ENO1 Y44	92		EFNB2 Y304	CTNND1 Y228	94		SH2D3A Y231 S218	EPHA2 Y588	185		BCAR3 Y266	BCAR1 Y387	145		SHC1 Y427	SHC1 Y349	87		MAPK14 Y182	MAPK3 Y204	115
PXN S84 Y88	PIK3R2 Y464	92		EGFR Y1172	ERBB2IP Y1104	94		PTPRA Y798	GSK3B Y216	185		TNK2 Y859	MPZL1 Y263	145		INSR Y1185	GSK3B Y216	87		ATA2 Y20	MAPK1 Y187	114
EFNB2 Y304	EPHA2 Y772	92		TFRC Y20	INPPL1 Y986	93		PXN Y118	GRLF1 Y1105	185		CAV1 Y14	SHB Y268	145		MAPK3 Y204	ERBB2IP Y1104	87		STAT3 Y704	SHC1 Y427	114
DSC3 Y818	PTRF Y308	92		TFRC Y20	EGFR Y1092	93		PXN Y118	MAPK3 Y204	185		INSR Y1189	EGFR Y1172	144		ATA2 Y20	PIK3R2 Y464	86		PIK3R2 Y464	PTPRA Y798	114
ANXA2 Y24	ITGB4 Y1207	92		CRKL Y132	PKP3 Y176	93		MAPK1 T185 Y187	GPRC5A Y347	185		PXN S84 Y88	MAPK1 Y187	144		SH2D3A Y231 S218	TNK2 Y859	86		EFNB2 Y304	PRPF4B Y849	114
PXN S84 Y88	EPHA2 Y588 Y594	91		EFNB2 Y304	ENO1 Y44	93		LDLR Y845	PTPN11 Y62	185		EFNB2 Y304	AFAP1L2 Y413	144		SH2D3A Y231 S218	ERBB2IP Y1104	86		CDK2 Y15	SHB Y268	114
PTPRA Y798	LDLR Y845	91		EFNB2 Y304	ITGB4 Y1207	93		PIK3R2 Y464	FAM59A Y453	183		PTPRA Y798	EPHA2 Y772	144		FAM59A Y453	ACP1 Y132	86		GIT1 Y545	PTRF Y308	114
PIK3R2 Y464	ACP1 Y132	91		PTPRA Y798	ANXA2 Y238	93		PXN Y118	GPRC5A Y347	183		AFAP1L2 Y413	EPHA2 Y588	144		FAM59A Y453	ERBB2IP Y1104	86		GIT1 Y545	MPZL1 Y263	114
MAPK1 T185 Y187	SKT Y393	91		STAT3 Y705	EGFR Y1092	93		FAM59A Y453	DSC3 Y818	182		DYRK1A Y321	PTPN11 Y62	144		CTNND1 Y228	CAV1 Y14	86		BCAR1 Y234	PTRF Y308	114
ITGB4 Y1207	SHC1 Y349	91		STAT3 Y704	CRKL Y132	92		FAM59A Y453	PTRF Y308	182		EPHA2 Y588	PTK2 Y397	144		AFAP1L2 Y413	INPPL1 Y986	86		DSC3 Y818	STAT3 Y705	114
GIT1 Y545	DYRK1A Y321	91		TFRC Y20	PTRF Y308	92		MAPK1 T185 Y187	ITGB4 Y1207	182		INSR Y1189	FAM59A Y453	143		AFAP1L2 Y413	EGFR Y1092	86		LDLR Y845	SHB Y268	114
EPHA2 Y772	GSK3B Y216	91		CRKL Y132	EPHA2 Y772	92		MAPK1 T185 Y187	MAPK3 Y204	182		ERBB2 Y1248	CRKL Y132	143		SKT Y393	BCAR1 Y249	86		ACP1 Y132	SHB Y268	114
DYRK1A Y321	ACP1 Y132	91		PXN S84 Y88	MAPK1 T185 Y187	91		DSC3 Y818	SHB Y268	182		BCAR1 Y327	CRKL Y132	143		MAPK3 Y204	LDLR Y845	86		INSR Y1189	MAPK1 T185 Y187	113
ANXA2 Y30	PTRF Y308	91		EFNB2 Y304	SHC1 Y427	91		PIK3R2 Y464	SHB Y268	181		DSC3 Y818	DYRK1A Y321	143		DYRK1A Y321	FYN Y420	86		STAT3 Y704	SHC1 Y349	113
PIK3R2 Y464	INSR Y1185	90		EFNB2 Y304	CAV1 Y14	91		PXN Y118	ITGB4 Y1207	181		ATA2 Y20	BCAR1 Y249	142		ALB Y164	PTK2 Y576	86		MAPK1 T185 Y187	PTK2 Y576	113
GIT1 Y545	INSR Y1185	90		MAPK1 T185 Y187	GSK3B Y216	91		INSR Y1189	LDLR Y845	180		CDK2 Y15	SGK223 Y413	142		STAT3 Y704	PKP3 Y176	85		DSC3 Y818	PKP3 Y176	113
EPHA2 Y575	EPHB1 Y600	90		ITGB4 Y1207	ALB Y164	91		PXN S84 Y88	BCAR3 Y266	180		GIT1 Y545	MAPK1 T185 Y187	142		PXN Y118	EPHA2 Y772	85		STAT3 Y704	AFAP1L2 Y413	112
ENO1 Y44	DSC3 Y818	90		EFNB2 Y304	MAPK14 Y182	90		ERBB2 Y1248	FAM59A Y453	180		CTNND1 Y228	EPHA2 Y588 Y594	142		CRKL Y132	PTPN11 Y62	84		PIK3R2 Y464	SGK223 Y413	112
CTNND1 Y228	ITGB4 Y1207	90		SH2D3A Y231 S218	GSK3B Y216	90		PTPRA Y798	RIN1 Y36	180		MAPK1 T185 Y187	BCAR1 Y249	142		GIT1 Y545	BCAR1 Y387	84		SHC1 Y349 Y350	INPPL1 Y986	112
CTNND1 Y228	ERBB2IP Y1104	90		EGFR Y1197	PKP3 Y176	90		EFNB2 Y304	SKT Y393	179		ITGB4 Y1207	ALB Y164	142		EGFR Y1197	STAT3 Y705	84		PTPRA Y798	PTK2 Y397	112
ATA2 Y20	ENO1 Y44	90		EGFR Y1172	SHB Y268	90		BCAR3 Y266	EPHA2 Y588 Y594	179		SKT Y393	PRPF4B Y849	142		CTNND1 Y228	RIN1 Y36	84		AFAP1L2 Y413	STAT3 Y705	112
ATA2 Y20	PTRF Y308	90		ENO1 Y44	DYRK1A Y321	90		PRPF4B Y849	DYRK1A Y321	179		ATA2 Y20	PXN S84 Y88	141		PXN Y118	PTRF Y308	84		SHC1 Y427	STAT3 Y705	112
STAT3 Y704	FAM59A Y453	89		MAPK3 Y204	PTRF Y308	90		CRKL Y132	CTNND1 Y228	178		PXN S84 Y88	MAPK3 Y204	141		PXN Y118	PTK2 Y576	84		EPHA2 Y588 Y594	PTRF Y308	112
STAT3 Y704	PTRF Y308	89		PIK3R2 Y464	EPHA2 Y575	89		EFNB2 Y304	EPHB1 Y600	178		ERBB2 Y1248	SH2D3A Y231 S218	141		MAPK1 Y187	ERBB2IP Y1104	84		SHC1 Y349	STAT3 Y705	112
PTRF Y308	STAT3 Y705	89		TFRC Y20	EPHA2 Y588 Y594	89		EFNB2 Y304	FYN Y420	178		BCAR1 Y327	DYRK1A Y321	141		MAPK1 T185 Y187	MPZL1 Y263	84		BCAR1 Y327	PIK3R2 Y464	111
PRPF4B Y849	PTRF Y308	89		CRKL Y132	CDK2 Y15	89		SGK223 Y413	DYRK1A Y321	178		TFRC Y20	DYRK1A Y321	141		ITGB4 Y1207	LDLR Y845	84		TFRC Y20	EPHA2 Y588 Y594	111
PIK3R2 Y464	ENO1 Y44	89		FAM59A Y453	EGFR Y1172	89		EPHA2 Y588	ERBB2IP Y1104	178		EFNB2 Y304	INSR Y1185	141		ITGB4 Y1207	PTK2 Y397	84		EFNB2 Y304	MAPK1 T185 Y187	111
PIK3R2 Y464	GSK3B Y216	89		PTPRA Y798	ACP1 Y132	89		STAT3 Y704	EGFR Y1197	177		EGFR Y1197	MAPK14 Y182	141		STAT3 Y704	EGFR Y1197	83		CDK2 Y15	PTPRA Y798	111
INSR Y1189	PIK3R2 Y464	89		MAPK1 T185 Y187	ITGB4 Y1207	89		SH2D3A Y231 S218	LDLR Y845	177		BCAR3 Y266	PTPN11 Y62	141		SH2D3A Y231 S218	ACP1 Y132	83		BCAR3 Y266	EPHB1 Y600	111
FAM59A Y453	STAT3 Y705	89		MAPK1 T185 Y187	SKT Y393	89		ENO1 Y44	GPRC5A Y347	177		ATA2 Y20	CRKL Y132	140		EGFR Y1197	GPRC5A Y347	83		PRPF4B Y849	FYN Y420	111
EPHA2 Y772	SKT Y393	89		PIK3R2 Y464	ITGB4 Y1207	88		EPHA2 Y588 Y594	ACP1 Y132	177		CDK2 Y15	ANXA2 Y30	140		ENO1 Y44	MPZL1 Y263	83		ATA2 Y20	STAT3 Y704	110
SHC1 Y349	ACP1 Y132	88		EFNB2 Y304	ACP1 Y132	88		STAT3 Y704	SHC1 Y427	176		CDK2 Y15	ITGB4 Y1207	140		ATA2 Y20	MAPK3 Y204	82		STAT3 Y704	CAV1 Y14	110
PTPRA Y798	AFAP1L2 Y413	88		CRKL Y132	ANXA2 Y238	87		PIK3R2 Y464	RIN1 Y36	176		CDK2 Y15	PRPF4B Y849	140		INSR Y1189	ENO1 Y44	82		ERBB2 Y1248	SHC1 Y349 Y350	110
INSR Y1189	GIT1 Y545	88		EPHA2 Y588 Y594	ACP1 Y132	87		PXN Y118	ANXA2 Y24	176		CDK2 Y15	GSK3B Y216	140		BCAR1 Y327	BCAR1 Y387	82		TFRC Y20	SHC1 Y349 Y350	110
INSR Y1185	PTK2 Y397	88		PTRF Y308	SHB Y268	87		PXN Y118	PKP3 Y176	176		ATA2 Y20	MAPK3 Y204	139		PXN Y118	GPRC5A Y347	82		CRKL Y132	CTNND1 Y228	110
FAM59A Y453	EGFR Y1172	88		EFNB2 Y304	FAM59A Y453	86		CRKL Y132	PTPRA Y798	175		ERBB2 Y1248	AFAP1L2 Y413	139		MAPK1 T185 Y187	SKT Y393	82		RIN1 Y36	SKT Y393	110
FAM59A Y453	EGFR Y1092	88		FAM59A Y453	PTRF Y308	86		SHC1 Y349 Y350	ANXA2 Y24	175		CTNND1 Y228	SHB Y268	139		SHC1 Y427	ANXA2 Y30	82		BCAR3 Y266	DSC3 Y818	110
ANXA2 Y30	ITGB4 Y1207	88		FAM59A Y453	PTPN11 Y62	86		FAM59A Y453	ANXA2 Y24	175		BCAR3 Y266	DSC3 Y818	139		ENO1 Y44	INSR Y1185	82		EPHA2 Y772	PTK2 Y576	110
SHC1 Y427	GRLF1 Y1105	87		CTNND1 Y228	MAPK1 T185 Y187	86		CTNND1 Y228	GPRC5A Y347	175		PXN S84 Y88	BCAR1 Y327	138		ITGB4 Y1207	PTRF Y308	82		SGK223 Y413	MAPK3 Y204	110
PXN S84 Y88	EPHA2 Y575	87		MAPK1 T185 Y187	SHC1 Y427	86		STAT3 Y704	EGFR Y1172	174		STAT3 Y704	SHC1 Y427	138		TNK2 Y859	MAPK14 Y182	82		EPHA2 Y588	ACP1 Y132	110
PTPRA Y798	EPHA2 Y588	87		INPPL1 Y986	SHB Y268	86		SH2D3A Y231 S218	SHB Y268	174		ERBB2 Y1248	CDK2 Y15	138		TNK2 Y859	STAT3 Y705	82		ATA2 Y20	STAT3 Y705	109
MAPK1 T185 Y187	ENO1 Y44	87		EPHA2 Y588 Y594	INSR Y1185	86		ENO1 Y44	PKP3 Y176	174		ERBB2 Y1248	SHC1 Y427	138		EPHA2 Y588 Y594	ERBB2IP Y1104	82		PXN S84 Y88	PTPRA Y798	109
FAM59A Y453	MAPK1 Y187	87		GRLF1 Y1105	LDLR Y845	86		TNK2 Y859	MAPK3 Y204	174		SHC1 Y427	STAT3 Y705	138		GSK3B Y216	PTK2 Y576	82		ERBB2 Y1248	EPHA2 Y772	109
FAM59A Y453	INPPL1 Y986	87		SHC1 Y349	ERBB2IP Y1104	86		GIT1 Y545	BCAR3 Y266	173		PRPF4B Y849	EGFR Y1092	138		PXN S84 Y88	ITGB4 Y1207	81		TFRC Y20	GPRC5A Y347	109
FAM59A Y453	MAPK3 Y204	87		SHB Y268	EGFR Y1092	86		ANXA2 Y24	PTPN11 Y62	173		PXN S84 Y88	SHC1 Y349	137		STAT3 Y704	TNK2 Y859	81		SHC1 Y349 Y350	PRPF4B Y849	109
ERBB2 Y1248	ERBB2IP Y1104	87		ERBB2 Y1248	MPZL1 Y263	85		ANXA2 Y30	EPHA2 Y588	173		PIK3R2 Y464	PTK2 Y397	137		AFAP1L2 Y413	EGFR Y1172	81		FAM59A Y453	CAV1 Y14	109
STAT3 Y705	MPZL1 Y263	86		PIK3R2 Y464	ACP1 Y132	85		MAPK3 Y204	STAT3 Y705	173		EFNB2 Y304	SKT Y393	137		ENO1 Y44	PKP3 Y176	81		ITGB4 Y1207	EPHA2 Y588 Y594	109
STAT3 Y704	MPZL1 Y263	86		CRKL Y132	STAT3 Y705	85		CTNND1 Y228	PTK2 Y397	172		PXN Y118	BCAR1 Y387	136		STAT3 Y705	PKP3 Y176	81		EPHA2 Y588 Y594	PKP3 Y176	109
SH2D3A Y231 S218	SHB Y268	86		EFNB2 Y304	SHB Y268	85		PTPRA Y798	PTK2 Y397	172		EGFR Y1172	STAT3 Y705	136		PIK3R2 Y464	ANXA2 Y24	80		TFRC Y20	CDK2 Y15	108
PXN S84 Y88	SHC1 Y349 Y350	86		CDK2 Y15	EPHA2 Y575	85		RIN1 Y36	DSC3 Y818	172		EPHA2 Y772	SGK223 Y413	136		PIK3R2 Y464	ACP1 Y132	80		CRKL Y132	DSC3 Y818	108
PTRF Y308	GSK3B Y216	86		FAM59A Y453	INPPL1 Y986	85		ENO1 Y44	GSK3B Y216	172		SKT Y393	PTK2 Y397	136		PTPRA Y798	MAPK3 Y204	80		CDK2 Y15	TNK2 Y859	108
PTK2 Y397	BCAR1 Y249	86		FAM59A Y453	EGFR Y1092	85		AFAP1L2 Y413	DYRK1A Y321	171		PTRF Y308	DYRK1A Y321	136		ENO1 Y44	PTK2 Y397	80		GIT1 Y545	ITGB4 Y1207	108
PIK3R2 Y464	PRPF4B Y849	86		BCAR3 Y266	FYN Y420	85		EPHA2 Y588	ALB Y164	171		FYN Y420	PTPN11 Y62	136		ITGB4 Y1207	GPRC5A Y347	80		CTNND1 Y228	CAV1 Y14	108
INSR Y1189	PTK2 Y397	86		MAPK1 T185 Y187	ENO1 Y44	85		ATA2 Y20	SHB Y268	170		INSR Y1189	AFAP1L2 Y413	135		MAPK3 Y204	PKP3 Y176	80		RIN1 Y36	MPZL1 Y263	108
EPHA2 Y772	ERBB2IP Y1104	86		GPRC5A Y347	ACP1 Y132	85		BCAR3 Y266	ITGB4 Y1207	170		PXN Y118	MAPK1 Y187	135		SHC1 Y349 Y350	MPZL1 Y263	79		MAPK1 Y187	PTRF Y308	108
CRKL Y132	SHB Y268	86		SHB Y268	PTPN11 Y62	85		ANXA2 Y30	ACP1 Y132	170		AFAP1L2 Y413	PTK2 Y397	135		GIT1 Y545	BCAR1 Y234	79		TNK2 Y859	PKP3 Y176	108
CDK2 Y15	GRLF1 Y1105	86		ERBB2 Y1248	LDLR Y845	84		ATA2 Y20	DYRK1A Y321	169		ANXA2 Y30	ACP1 Y132	135		PXN Y118	PTPN11 Y62	79		CAV1 Y14	STAT3 Y705	108
BCAR1 Y234	PTK2 Y397	86		EFNB2 Y304	TNK2 Y859	84		CRKL Y132	ANXA2 Y238	169		DSC3 Y818	FYN Y420	135		MAPK1 T185 Y187	PKP3 Y176	79		GRLF1 Y1105	FYN Y420	108
STAT3 Y704	CRKL Y132	85		CDK2 Y15	DYRK1A Y321	84		CDK2 Y15	SHB Y268	169		ERBB2 Y1248	BCAR1 Y387	134		PRPF4B Y849	PTK2 Y397	79		EPHA2 Y588	LDLR Y845	108
PTPRA Y798	SGK223 Y413	85		ITGB4 Y1207	ANXA2 Y238	84		ENO1 Y44	SHB Y268	169		ERBB2 Y1248	MAPK3 Y204	134		BCAR1 Y387	EPHA2 Y588	79		PIK3R2 Y464	INSR Y1185	107
PKP3 Y176	ERBB2IP Y1104	85		MPZL1 Y263	ERBB2IP Y1104	84		STAT3 Y704	SHC1 Y349	168		BCAR1 Y327	TNK2 Y859	134		MAPK3 Y204	PTRF Y308	79		EGFR Y1197	ANXA2 Y30	107
MPZL1 Y263	EGFR Y1092	85		STAT3 Y704	EFNB2 Y304	83		PXN Y118	INSR Y1185	168		SHC1 Y349 Y350	ANXA2 Y30	134		TFRC Y20	MAPK1 T185 Y187	78		FAM59A Y453	SKT Y393	107
MAPK1 T185 Y187	ITGB4 Y1207	85		MAPK1 T185 Y187	CAV1 Y14	83		ITGB4 Y1207	EPHA2 Y588	168		EPHA2 Y575	SHB Y268	134		SH2D3A Y231 S218	CTNND1 Y228	78		RIN1 Y36	DYRK1A Y321	107
EPHA2 Y772	GRLF1 Y1105	85		MAPK1 T185 Y187	ACP1 Y132	83		ATA2 Y20	EPHA2 Y588	167		PTPRA Y798	ALB Y164	134		EPHA2 Y575	EPHA2 Y588 Y594	78		ENO1 Y44	SHC1 Y349	107
EGFR Y1172	MPZL1 Y263	85		ENO1 Y44	EPHA2 Y588 Y594	83		ERBB2 Y1248	MAPK1 Y187	167		ANXA2 Y30	ANXA2 Y238	134		FAM59A Y453	INPPL1 Y986	78		SKT Y393	ERBB2IP Y1104	107
CRKL Y132	STAT3 Y705	85		ITGB4 Y1207	INSR Y1185	83		GIT1 Y545	ENO1 Y44	167		MPZL1 Y263	SHB Y268	134		FAM59A Y453	EGFR Y1092	78		INSR Y1189	DSC3 Y818	106
BCAR3 Y266	PTK2 Y397	85		DSC3 Y818	MPZL1 Y263	83		GIT1 Y545	DYRK1A Y321	167		ATA2 Y20	EGFR Y1197	133		MAPK1 Y187	MAPK1 T185 Y187	78		STAT3 Y704	ANXA2 Y30	106
PXN S84 Y88	SHC1 Y349	84		MAPK3 Y204	ANXA2 Y238	83		SHB Y268	ANXA2 Y238	167		INSR Y1189	EPHB1 Y600	133		ITGB4 Y1207	PTK2 Y576	78		PIK3R2 Y464	BCAR1 Y234	106
PIK3R2 Y464	PTPN11 Y62	84		DYRK1A Y321	ACP1 Y132	83		SHB Y268	PTK2 Y576	167		ERBB2 Y1248	BCAR1 Y234	133		SGK223 Y413	DYRK1A Y321	78		SHC1 Y349 Y350	PTK2 Y576	106
INPPL1 Y986	MPZL1 Y263	84		EPHA2 Y588	PTK2 Y397	83		MAPK1 T185 Y187	SHC1 Y349	166		GIT1 Y545	GPRC5A Y347	133		FYN Y420	PTK2 Y576	78		ANXA2 Y24	ACP1 Y132	106
ERBB2 Y1248	EPHA2 Y772	84		GPRC5A Y347	ANXA2 Y238	83		ENO1 Y44	PTRF Y308	166		INSR Y1189	BCAR1 Y387	132		ATA2 Y20	AFAP1L2 Y413	77		EGFR Y1172	GSK3B Y216	106
EPHA2 Y772	MPZL1 Y263	84		INSR Y1189	EPHA2 Y588 Y594	82		SHC1 Y349 Y350	PTK2 Y397	165		CDK2 Y15	INPPL1 Y986	132		ERBB2 Y1248	SH2D3A Y231 S218	77		MAPK1 T185 Y187	ERBB2IP Y1104	106
ENO1 Y44	CAV1 Y14	84		PIK3R2 Y464	GSK3B Y216	82		EGFR Y1197	TNK2 Y859	165		GIT1 Y545	BCAR1 Y234	132		SH2D3A Y231 S218	EGFR Y1197	77		ENO1 Y44	GPRC5A Y347	106
TFRC Y20	ANXA2 Y24	83		FAM59A Y453	MAPK1 T185 Y187	82		BCAR3 Y266	SHB Y268	165		ENO1 Y44	EGFR Y1092	132		PTPRA Y798	GPRC5A Y347	77		ENO1 Y44	ACP1 Y132	106
TFRC Y20	EPHA2 Y772	83		PTPRA Y798	ENO1 Y44	82		DSC3 Y818	DYRK1A Y321	165		SGK223 Y413	PTK2 Y576	132		AFAP1L2 Y413	MAPK1 Y187	77		TNK2 Y859	PRPF4B Y849	106
SHC1 Y427	ITGB4 Y1207	83		PTPRA Y798	PTPN11 Y62	82		GRLF1 Y1105	INSR Y1185	165		GRLF1 Y1105	SHB Y268	132		TNK2 Y859	GPRC5A Y347	77		TNK2 Y859	GSK3B Y216	106
SH2D3A Y231 S218	MAPK1 T185 Y187	83		PXN Y118	FYN Y420	82		EPHA2 Y588	PTK2 Y576	165		EPHB1 Y600	PTK2 Y576	132		EPHA2 Y588	SHB Y268	77		DSC3 Y818	LDLR Y845	106
SH2D3A Y231 S218	GRLF1 Y1105	83		MAPK1 T185 Y187	MAPK14 Y182	82		INSR Y1189	ITGB4 Y1207	164		DYRK1A Y321	LDLR Y845	132		INSR Y1189	EGFR Y1197	76		SGK223 Y413	FYN Y420	106
RIN1 Y36	ITGB4 Y1207	83		ITGB4 Y1207	SGK223 Y413	82		PIK3R2 Y464	DYRK1A Y321	164		PIK3R2 Y464	ALB Y164	131		TFRC Y20	ERBB2IP Y1104	76		INSR Y1185	ANXA2 Y238	106
PTPRA Y798	PTRF Y308	83		SKT Y393	MPZL1 Y263	82		GIT1 Y545	PTPRA Y798	164		INSR Y1189	TNK2 Y859	130		CDK2 Y15	ENO1 Y44	76		DYRK1A Y321	ERBB2IP Y1104	106
MAPK1 T185 Y187	SHC1 Y427	83		STAT3 Y705	MPZL1 Y263	82		PTPRA Y798	STAT3 Y705	164		ERBB2 Y1248	SHC1 Y349	130		GIT1 Y545	SKT Y393	76		ATA2 Y20	RIN1 Y36	105
GIT1 Y545	PTK2 Y576	83		INSR Y1189	ITGB4 Y1207	81		SHC1 Y427	TNK2 Y859	164		PIK3R2 Y464	CDK2 Y15	130		EGFR Y1197	INSR Y1185	76		PIK3R2 Y464	SHC1 Y349 Y350	105
CAV1 Y14	PTRF Y308	83		PIK3R2 Y464	PTPRA Y798	81		PTPRA Y798	PRPF4B Y849	163		CRKL Y132	SGK223 Y413	130		BCAR1 Y234	SGK223 Y413	76		PIK3R2 Y464	BCAR1 Y387	105
PIK3R2 Y464	CDK2 Y15	82		PIK3R2 Y464	ENO1 Y44	81		MAPK1 Y187	MAPK1 T185 Y187	163		EFNB2 Y304	EPHA2 Y772	130		BCAR1 Y234	ALB Y164	76		CRKL Y132	GPRC5A Y347	105
ITGB4 Y1207	ALB Y164	82		PIK3R2 Y464	PRPF4B Y849	81		ANXA2 Y30	EPHA2 Y588 Y594	163		BCAR1 Y234	PTRF Y308	130		SHB Y268	BCAR1 Y249	76		AFAP1L2 Y413	PRPF4B Y849	105
GRLF1 Y1105	SHC1 Y349	82		EFNB2 Y304	EGFR Y1092	81		ENO1 Y44	PRPF4B Y849	163		CAV1 Y14	DYRK1A Y321	130		INSR Y1189	RIN1 Y36	75		ANXA2 Y30	STAT3 Y705	105
GRLF1 Y1105	DYRK1A Y321	82		SH2D3A Y231 S218	GPRC5A Y347	81		EGFR Y1197	STAT3 Y705	162		GSK3B Y216	PTK2 Y397	130		PTPRA Y798	BCAR1 Y249	75		DSC3 Y818	MAPK3 Y204	105
CDK2 Y15	SHB Y268	82		RIN1 Y36	EPHA2 Y588 Y594	81		PXN Y118	PTPN11 Y62	162		TFRC Y20	PTK2 Y576	129		RIN1 Y36	INSR Y1185	75		EPHA2 Y588 Y594	EPHB1 Y600	105
ANXA2 Y30	ENO1 Y44	82		PRPF4B Y849	EPHA2 Y588 Y594	81		EGFR Y1172	TNK2 Y859	162		BCAR3 Y266	EPHB1 Y600	129		TNK2 Y859	GRLF1 Y1105	75		INSR Y1189	EPHB1 Y600	104
TFRC Y20	PKP3 Y176	81		EPHA2 Y588 Y594	GPRC5A Y347	81		ENO1 Y44	INSR Y1185	162		ANXA2 Y30	CAV1 Y14	129		DSC3 Y818	PTRF Y308	75		SHC1 Y349 Y350	EFNB2 Y304	104
PXN Y118	ITGB4 Y1207	81		INSR Y1185	LDLR Y845	81		BCAR3 Y266	GRLF1 Y1105	161		INPPL1 Y986	PTRF Y308	129		PRPF4B Y849	PTK2 Y576	75		PTPRA Y798	EPHB1 Y600	104
PTPRA Y798	ANXA2 Y238	81		STAT3 Y704	MAPK1 T185 Y187	80		SHC1 Y427	STAT3 Y705	161		SKT Y393	DYRK1A Y321	129		PTPRA Y798	PTRF Y308	74		AFAP1L2 Y413	PTPN11 Y62	104
PIK3R2 Y464	LDLR Y845	81		EFNB2 Y304	INPPL1 Y986	80		ITGB4 Y1207	PTK2 Y576	161		ATA2 Y20	MAPK1 Y187	128		SHC1 Y427	GRLF1 Y1105	74		INPPL1 Y986	PTK2 Y397	104
MAPK3 Y204	PTK2 Y397	81		EFNB2 Y304	STAT3 Y705	80		CRKL Y132	GRLF1 Y1105	160		INSR Y1189	SGK223 Y413	128		SKT Y393	ERBB2IP Y1104	74		SGK223 Y413	INSR Y1185	104
MAPK14 Y182	GPRC5A Y347	81		EGFR Y1197	ANXA2 Y24	80		SHC1 Y349 Y350	SHB Y268	160		BCAR1 Y234	EGFR Y1092	128		SGK223 Y413	BCAR1 Y387	74		EPHA2 Y588 Y594	FYN Y420	104
MAPK1 Y187	PTK2 Y397	81		CTNND1 Y228	MPZL1 Y263	80		SH2D3A Y231 S218	DYRK1A Y321	160		BCAR3 Y266	CAV1 Y14	128		PXN S84 Y88	PTK2 Y576	73		INSR Y1185	EPHB1 Y600	104
ITGB4 Y1207	SHB Y268	81		AFAP1L2 Y413	MAPK14 Y182	80		GSK3B Y216	DYRK1A Y321	160		CDK2 Y15	BCAR1 Y234	127		TFRC Y20	BCAR1 Y249	73		PTRF Y308	PTPN11 Y62	104
EGFR Y1197	CTNND1 Y228	81		MAPK1 T185 Y187	SHB Y268	80		FYN Y420	SHB Y268	160		CDK2 Y15	EGFR Y1092	127		CDK2 Y15	FYN Y420	73		GPRC5A Y347	SHB Y268	104
EGFR Y1197	PTRF Y308	81		PTK2 Y397	ANXA2 Y238	80		SHC1 Y349 Y350	RIN1 Y36	159		PXN Y118	MAPK3 Y204	127		GIT1 Y545	EPHB1 Y600	73		INSR Y1189	FAM59A Y453	103
CRKL Y132	SH2D3A Y231 S218	81		INSR Y1189	LDLR Y845	79		AFAP1L2 Y413	PTK2 Y576	159		ANXA2 Y30	SHB Y268	127		PXN Y118	BCAR1 Y387	73		INSR Y1189	ACP1 Y132	103
TNK2 Y859	PTRF Y308	80		PIK3R2 Y464	PTK2 Y397	79		EGFR Y1172	STAT3 Y705	159		TNK2 Y859	GPRC5A Y347	127		EGFR Y1172	SHC1 Y349	73		TFRC Y20	GSK3B Y216	103
PIK3R2 Y464	EPHA2 Y588	80		SHC1 Y349 Y350	EFNB2 Y304	79		BCAR1 Y234	EPHA2 Y588	158		BCAR1 Y327	ENO1 Y44	126		FYN Y420	BCAR1 Y249	73		CDK2 Y15	EPHA2 Y588	103
GSK3B Y216	ALB Y164	80		EFNB2 Y304	CDK2 Y15	79		MAPK1 Y187	PTK2 Y397	158		AFAP1L2 Y413	SKT Y393	126		PXN S84 Y88	BCAR1 Y249	72		EPHA2 Y575	BCAR1 Y249	103
GPRC5A Y347	PTK2 Y397	80		EFNB2 Y304	ALB Y164	79		CAV1 Y14	SHC1 Y349	158		BCAR3 Y266	INSR Y1185	126		FAM59A Y453	AFAP1L2 Y413	72		PTPRA Y798	GSK3B Y216	103
ENO1 Y44	TNK2 Y859	80		GIT1 Y545	MAPK14 Y182	79		PXN Y118	DYRK1A Y321	157		SHC1 Y427	CAV1 Y14	126		SH2D3A Y231 S218	SHC1 Y349	71		SHC1 Y427	PTRF Y308	103
EGFR Y1197	ENO1 Y44	80		MAPK1 Y187	EPHA2 Y588	79		FAM59A Y453	DYRK1A Y321	156		EPHA2 Y772	ITGB4 Y1207	126		FAM59A Y453	GRLF1 Y1105	71		FYN Y420	PTPN11 Y62	103
AFAP1L2 Y413	PTK2 Y576	80		ENO1 Y44	GPRC5A Y347	79		PTPRA Y798	PTRF Y308	156		DYRK1A Y321	ACP1 Y132	126		PTPRA Y798	SKT Y393	71		ATA2 Y20	AFAP1L2 Y413	102
GRLF1 Y1105	ALB Y164	79		ITGB4 Y1207	EPHB1 Y600	79		AFAP1L2 Y413	RIN1 Y36	156		BCAR1 Y327	PRPF4B Y849	125		PTPRA Y798	LDLR Y845	71		SH2D3A Y231 S218	GIT1 Y545	102
ERBB2 Y1248	SHC1 Y427	79		ITGB4 Y1207	MAPK3 Y204	79		BCAR3 Y266	ACP1 Y132	156		GIT1 Y545	INPPL1 Y986	125		ANXA2 Y30	PKP3 Y176	71		EPHA2 Y575	BCAR3 Y266	102
CTNND1 Y228	TNK2 Y859	79		ITGB4 Y1207	LDLR Y845	79		EPHA2 Y772	EPHA2 Y588	156		BCAR1 Y234	RIN1 Y36	125		ENO1 Y44	DYRK1A Y321	71		PTPRA Y798	MAPK1 T185 Y187	102
SKT Y393	PKP3 Y176	78		GSK3B Y216	ANXA2 Y238	79		TNK2 Y859	SHC1 Y349	156		SKT Y393	ANXA2 Y238	125		DSC3 Y818	SHC1 Y349	71		PTPRA Y798	SHB Y268	102
PXN Y118	GSK3B Y216	78		ACP1 Y132	ANXA2 Y238	79		ACP1 Y132	ALB Y164	156		INSR Y1185	PTRF Y308	125		CAV1 Y14	GSK3B Y216	71		PXN Y118	MAPK1 T185 Y187	102
PTPRA Y798	MAPK1 Y187	78		ERBB2 Y1248	EPHA2 Y588 Y594	78		PIK3R2 Y464	PTK2 Y576	154		ERBB2 Y1248	MAPK1 Y187	124		EFNB2 Y304	GIT1 Y545	70		ATA2 Y20	CDK2 Y15	101
PTPRA Y798	MAPK3 Y204	78		ERBB2 Y1248	ANXA2 Y238	78		FAM59A Y453	ENO1 Y44	154		ERBB2 Y1248	GSK3B Y216	124		EGFR Y1197	SHC1 Y349	70		ATA2 Y20	ENO1 Y44	101
PRPF4B Y849	SHB Y268	78		TFRC Y20	PTPN11 Y62	78		GRLF1 Y1105	MPZL1 Y263	154		BCAR1 Y327	EGFR Y1092	124		BCAR1 Y234	EPHA2 Y588	70		INSR Y1189	ANXA2 Y238	101
PRPF4B Y849	ALB Y164	78		EFNB2 Y304	EGFR Y1172	78		CDK2 Y15	PXN Y118	153		GIT1 Y545	SHC1 Y427	124		PTPRA Y798	PTPN11 Y62	70		EFNB2 Y304	SKT Y393	101
ENO1 Y44	SHB Y268	78		INSR Y1185	GSK3B Y216	78		EGFR Y1172	CAV1 Y14	153		ANXA2 Y24	GPRC5A Y347	124		EPHA2 Y772	EPHA2 Y588	70		GIT1 Y545	INSR Y1185	101
ENO1 Y44	EGFR Y1092	78		GSK3B Y216	LDLR Y845	78		MAPK1 T185 Y187	ACP1 Y132	153		ATA2 Y20	SGK223 Y413	123		SGK223 Y413	PTK2 Y397	70		EPHA2 Y772	PTK2 Y397	101
EGFR Y1172	ENO1 Y44	78		PXN S84 Y88	SHC1 Y349	77		DSC3 Y818	PTK2 Y576	153		INSR Y1189	EPHA2 Y588 Y594	123		BCAR1 Y387	GSK3B Y216	70		SHB Y268	ANXA2 Y238	101
RIN1 Y36	MAPK14 Y182	77		CRKL Y132	ITGB4 Y1207	77		GRLF1 Y1105	EPHA2 Y588	153		INSR Y1189	ANXA2 Y238	123		PXN S84 Y88	ALB Y164	69		CRKL Y132	CDK2 Y15	100
PXN Y118	FYN Y420	77		CRKL Y132	PRPF4B Y849	77		SHC1 Y349	STAT3 Y705	153		BCAR1 Y234	PXN Y118	123		EFNB2 Y304	BCAR1 Y387	69		CDK2 Y15	ENO1 Y44	100
PIK3R2 Y464	ANXA2 Y238	77		CRKL Y132	ERBB2IP Y1104	77		SHC1 Y349 Y350	INPPL1 Y986	152		RIN1 Y36	INPPL1 Y986	123		BCAR1 Y234	PXN Y118	69		SH2D3A Y231 S218	DSC3 Y818	100
MAPK3 Y204	MPZL1 Y263	77		EGFR Y1197	GRLF1 Y1105	77		SHC1 Y349 Y350	EGFR Y1092	152		BCAR3 Y266	SGK223 Y413	123		ANXA2 Y24	ANXA2 Y30	69		BCAR1 Y234	INSR Y1185	100
MAPK1 Y187	MPZL1 Y263	77		MAPK1 T185 Y187	STAT3 Y705	77		RIN1 Y36	CAV1 Y14	152		PTK2 Y397	ALB Y164	123		MAPK1 Y187	ANXA2 Y30	69		PTPRA Y798	SGK223 Y413	100
MAPK1 T185 Y187	CAV1 Y14	77		ENO1 Y44	ANXA2 Y238	77		ANXA2 Y24	MAPK14 Y182	152		ERBB2IP Y1104	ALB Y164	123		ANXA2 Y30	MAPK14 Y182	69		AFAP1L2 Y413	RIN1 Y36	100
INPPL1 Y986	ENO1 Y44	77		PRPF4B Y849	ANXA2 Y238	77		MAPK1 T185 Y187	CAV1 Y14	152		CRKL Y132	ANXA2 Y30	122		INPPL1 Y986	SHC1 Y349	69		AFAP1L2 Y413	MAPK14 Y182	100
GRLF1 Y1105	GSK3B Y216	77		INSR Y1185	MPZL1 Y263	77		SHC1 Y427	CAV1 Y14	152		EFNB2 Y304	ALB Y164	122		SHC1 Y349	EGFR Y1092	69		RIN1 Y36	ERBB2IP Y1104	100
ANXA2 Y30	ACP1 Y132	77		EPHB1 Y600	GSK3B Y216	77		GRLF1 Y1105	GPRC5A Y347	152		BCAR1 Y234	SGK223 Y413	122		INSR Y1189	MAPK1 Y187	68		ATA2 Y20	GPRC5A Y347	99
TFRC Y20	PTRF Y308	76		EFNB2 Y304	MAPK1 Y187	76		PTRF Y308	PTPN11 Y62	152		ENO1 Y44	TNK2 Y859	122		PXN S84 Y88	PRPF4B Y849	68		STAT3 Y704	SHC1 Y349 Y350	99
PXN S84 Y88	ANXA2 Y30	76		EFNB2 Y304	PRPF4B Y849	76		ITGB4 Y1207	ACP1 Y132	151		ITGB4 Y1207	SKT Y393	122		STAT3 Y704	GSK3B Y216	68		PIK3R2 Y464	PRPF4B Y849	99
MAPK1 T185 Y187	GRLF1 Y1105	76		MAPK1 T185 Y187	TNK2 Y859	76		ERBB2 Y1248	PTK2 Y576	150		CAV1 Y14	FYN Y420	122		FAM59A Y453	PTPRA Y798	68		TFRC Y20	INSR Y1185	99
GIT1 Y545	GRLF1 Y1105	76		EPHB1 Y600	DYRK1A Y321	76		PIK3R2 Y464	INPPL1 Y986	150		ATA2 Y20	MAPK1 T185 Y187	121		AFAP1L2 Y413	SHC1 Y427	68		GIT1 Y545	PTK2 Y397	99
ERBB2 Y1248	TFRC Y20	76		INSR Y1189	GSK3B Y216	75		PIK3R2 Y464	EGFR Y1092	150		ERBB2 Y1248	MPZL1 Y263	121		AFAP1L2 Y413	EPHA2 Y772	68		FAM59A Y453	DYRK1A Y321	99
EPHA2 Y772	ITGB4 Y1207	76		INSR Y1189	MPZL1 Y263	75		SHC1 Y349 Y350	EPHA2 Y588	150		GPRC5A Y347	EGFR Y1092	121		MAPK1 Y187	ENO1 Y44	68		PTPRA Y798	AFAP1L2 Y413	99
CTNND1 Y228	INPPL1 Y986	76		STAT3 Y704	EGFR Y1197	75		SH2D3A Y231 S218	RIN1 Y36	150		PTPN11 Y62	PTK2 Y576	121		MAPK1 Y187	INSR Y1185	68		AFAP1L2 Y413	EPHA2 Y588 Y594	99
TFRC Y20	GRLF1 Y1105	75		ERBB2 Y1248	PIK3R2 Y464	75		FAM59A Y453	ANXA2 Y238	150		INSR Y1189	SHC1 Y349	120		BCAR1 Y387	ALB Y164	68		BCAR3 Y266	ENO1 Y44	99
PXN S84 Y88	ITGB4 Y1207	75		EFNB2 Y304	EPHA2 Y772	75		PTPRA Y798	SHB Y268	150		ERBB2 Y1248	PTRF Y308	120		MAPK14 Y182	MAPK3 Y204	68		EPHA2 Y772	ALB Y164	99
ITGB4 Y1207	PKP3 Y176	75		MAPK1 T185 Y187	MPZL1 Y263	75		MAPK1 T185 Y187	DYRK1A Y321	150		CDK2 Y15	DYRK1A Y321	120		GSK3B Y216	STAT3 Y705	68		DSC3 Y818	SGK223 Y413	99
EPHB1 Y600	PTK2 Y397	75		MAPK1 T185 Y187	EGFR Y1092	75		BCAR1 Y387	FYN Y420	150		GIT1 Y545	MAPK1 Y187	120		GSK3B Y216	PTK2 Y397	68		INSR Y1185	GSK3B Y216	99
EFNB2 Y304	GRLF1 Y1105	75		SHC1 Y349	MPZL1 Y263	75		EFNB2 Y304	PXN Y118	149		CTNND1 Y228	PTPN11 Y62	120		PXN S84 Y88	SHC1 Y349 Y350	67		GSK3B Y216	EPHA2 Y588	99
INSR Y1185	FYN Y420	74		STAT3 Y704	MPZL1 Y263	74		PTPRA Y798	GPRC5A Y347	149		BCAR3 Y266	EGFR Y1092	120		ERBB2 Y1248	PRPF4B Y849	67		PXN S84 Y88	ERBB2 Y1248	98
CDK2 Y15	ALB Y164	74		ERBB2 Y1248	PKP3 Y176	74		AFAP1L2 Y413	SGK223 Y413	149		TNK2 Y859	BCAR1 Y249	120		CRKL Y132	SH2D3A Y231 S218	67		PIK3R2 Y464	PTK2 Y397	98
AFAP1L2 Y413	DYRK1A Y321	74		PIK3R2 Y464	FAM59A Y453	74		INSR Y1189	ENO1 Y44	148		GRLF1 Y1105	PTK2 Y397	120		GIT1 Y545	FYN Y420	67		TFRC Y20	PTK2 Y397	98
TFRC Y20	DYRK1A Y321	73		SHC1 Y349 Y350	MAPK1 T185 Y187	74		BCAR1 Y387	ERBB2IP Y1104	148		INSR Y1189	PTPRA Y798	119		FAM59A Y453	RIN1 Y36	67		SHC1 Y349 Y350	STAT3 Y705	98
STAT3 Y704	ITGB4 Y1207	73		EGFR Y1197	RIN1 Y36	74		PIK3R2 Y464	SHC1 Y349	147		PXN S84 Y88	SHC1 Y427	119		RIN1 Y36	PRPF4B Y849	67		MAPK1 Y187	ENO1 Y44	98
SH2D3A Y231 S218	GIT1 Y545	73		CTNND1 Y228	DYRK1A Y321	74		PTPRA Y798	SHC1 Y427	147		BCAR1 Y327	PTPN11 Y62	119		ATA2 Y20	ANXA2 Y30	66		ENO1 Y44	GSK3B Y216	98
PTRF Y308	EPHA2 Y588	73		MAPK1 T185 Y187	INPPL1 Y986	74		PXN Y118	BCAR1 Y387	147		TFRC Y20	INPPL1 Y986	119		INSR Y1189	CAV1 Y14	66		SGK223 Y413	PTPN11 Y62	98
PTRF Y308	EGFR Y1092	73		DSC3 Y818	LDLR Y845	74		RIN1 Y36	ANXA2 Y238	147		BCAR1 Y234	ITGB4 Y1207	119		PXN S84 Y88	CTNND1 Y228	66		PRPF4B Y849	EPHB1 Y600	98
PTPRA Y798	INSR Y1185	73		GPRC5A Y347	MPZL1 Y263	74		ANXA2 Y24	ENO1 Y44	147		PXN Y118	GPRC5A Y347	119		PXN S84 Y88	GSK3B Y216	66		INSR Y1185	FYN Y420	98
PRPF4B Y849	GRLF1 Y1105	73		PIK3R2 Y464	ERBB2IP Y1104	73		ANXA2 Y30	SHB Y268	147		SKT Y393	SGK223 Y413	119		PIK3R2 Y464	ITGB4 Y1207	66		FYN Y420	GPRC5A Y347	98
ITGB4 Y1207	STAT3 Y705	73		CDK2 Y15	MAPK1 T185 Y187	73		PTPRA Y798	EGFR Y1172	146		INSR Y1189	BCAR1 Y234	118		EFNB2 Y304	SHB Y268	66		INSR Y1189	PIK3R2 Y464	97
INSR Y1189	PTPRA Y798	73		SH2D3A Y231 S218	MAPK3 Y204	73		BCAR3 Y266	DYRK1A Y321	146		PIK3R2 Y464	SKT Y393	118		CDK2 Y15	SHB Y268	66		INSR Y1189	ITGB4 Y1207	97
INPPL1 Y986	PTRF Y308	73		FAM59A Y453	ANXA2 Y238	73		INPPL1 Y986	DSC3 Y818	146		CRKL Y132	BCAR1 Y249	118		FAM59A Y453	CAV1 Y14	66		TFRC Y20	PRPF4B Y849	97
GSK3B Y216	DYRK1A Y321	73		SGK223 Y413	FYN Y420	73		DSC3 Y818	EGFR Y1092	146		CRKL Y132	ANXA2 Y238	118		AFAP1L2 Y413	PTK2 Y397	66		CRKL Y132	ANXA2 Y238	97
FYN Y420	PTK2 Y397	73		PXN S84 Y88	MAPK1 Y187	72		CAV1 Y14	MAPK3 Y204	146		CDK2 Y15	BCAR3 Y266	118		SKT Y393	BCAR1 Y387	66		EFNB2 Y304	DSC3 Y818	97
EPHA2 Y588	MPZL1 Y263	73		ERBB2 Y1248	ANXA2 Y24	72		ATA2 Y20	LDLR Y845	145		CDK2 Y15	BCAR1 Y249	118		CAV1 Y14	INSR Y1185	66		SH2D3A Y231 S218	ANXA2 Y238	97
EGFR Y1172	PTRF Y308	73		PIK3R2 Y464	MAPK3 Y204	72		PXN S84 Y88	CTNND1 Y228	145		BCAR1 Y234	ANXA2 Y238	118		ATA2 Y20	MAPK1 T185 Y187	65		CTNND1 Y228	EPHB1 Y600	97
DYRK1A Y321	SHB Y268	73		CRKL Y132	GSK3B Y216	72		EGFR Y1197	PTPRA Y798	145		MAPK1 Y187	MAPK14 Y182	118		PIK3R2 Y464	PXN Y118	65		PXN Y118	MAPK14 Y182	97
CTNND1 Y228	EGFR Y1172	73		EGFR Y1172	MAPK1 T185 Y187	72		CTNND1 Y228	RIN1 Y36	145		ANXA2 Y30	EGFR Y1092	118		EFNB2 Y304	BCAR1 Y234	65		TNK2 Y859	ACP1 Y132	97
CTNND1 Y228	EGFR Y1092	73		ITGB4 Y1207	PTK2 Y397	72		ITGB4 Y1207	MPZL1 Y263	145		ENO1 Y44	SGK223 Y413	118		CTNND1 Y228	PKP3 Y176	65		DSC3 Y818	MPZL1 Y263	97
ANXA2 Y30	GRLF1 Y1105	73		INSR Y1185	PTK2 Y397	72		DSC3 Y818	SHC1 Y349	145		EPHB1 Y600	PTK2 Y397	118		CAV1 Y14	PRPF4B Y849	65		SHC1 Y349	EGFR Y1092	97
TFRC Y20	ITGB4 Y1207	72		GPRC5A Y347	LDLR Y845	72		PIK3R2 Y464	EGFR Y1172	144		FYN Y420	ANXA2 Y238	118		GRLF1 Y1105	GPRC5A Y347	65		FYN Y420	PTK2 Y397	97
TFRC Y20	DSC3 Y818	72		LDLR Y845	ERBB2IP Y1104	72		PIK3R2 Y464	SHC1 Y427	144		ATA2 Y20	SHC1 Y349	117		LDLR Y845	PTK2 Y397	65		PIK3R2 Y464	SH2D3A Y231 S218	96
SGK223 Y413	DYRK1A Y321	72		ERBB2IP Y1104	ANXA2 Y238	72		ATA2 Y20	SHC1 Y349	143		BCAR1 Y327	DSC3 Y818	117		PTK2 Y397	ALB Y164	65		PIK3R2 Y464	INPPL1 Y986	96
PXN Y118	ALB Y164	72		PIK3R2 Y464	TFRC Y20	71		TFRC Y20	EFNB2 Y304	143		BCAR1 Y327	GPRC5A Y347	117		PIK3R2 Y464	SHC1 Y427	64		TFRC Y20	PXN Y118	96
MAPK1 T185 Y187	ERBB2IP Y1104	72		PIK3R2 Y464	GPRC5A Y347	71		SKT Y393	BCAR1 Y387	143		PIK3R2 Y464	BCAR1 Y234	117		TFRC Y20	ANXA2 Y30	64		SHC1 Y349 Y350	ANXA2 Y24	96
LDLR Y845	MPZL1 Y263	72		TFRC Y20	ANXA2 Y238	71		GPRC5A Y347	ANXA2 Y238	143		TFRC Y20	CTNND1 Y228	117		BCAR1 Y234	ITGB4 Y1207	64		EFNB2 Y304	CTNND1 Y228	96
INSR Y1189	FYN Y420	72		MAPK1 T185 Y187	PRPF4B Y849	71		ERBB2 Y1248	MAPK3 Y204	142		CRKL Y132	INPPL1 Y986	117		ANXA2 Y24	MAPK1 T185 Y187	64		SH2D3A Y231 S218	FAM59A Y453	96
EGFR Y1197	ITGB4 Y1207	72		EPHA2 Y772	EPHA2 Y588 Y594	71		PIK3R2 Y464	SGK223 Y413	142		ANXA2 Y24	ENO1 Y44	117		ENO1 Y44	DSC3 Y818	64		EGFR Y1172	PRPF4B Y849	96
ATA2 Y20	ITGB4 Y1207	72		ERBB2 Y1248	SH2D3A Y231 S218	70		SHC1 Y349 Y350	GRLF1 Y1105	142		EGFR Y1172	MAPK14 Y182	117		BCAR1 Y387	EPHB1 Y600	64		EGFR Y1172	ERBB2IP Y1104	96
SKT Y393	MPZL1 Y263	71		PIK3R2 Y464	SHB Y268	70		SH2D3A Y231 S218	MAPK1 T185 Y187	142		GSK3B Y216	ALB Y164	117		EPHA2 Y588 Y594	BCAR1 Y249	64		ITGB4 Y1207	SHB Y268	96
SH2D3A Y231 S218	FAM59A Y453	71		EFNB2 Y304	SHC1 Y349	70		PXN Y118	SHB Y268	142		ATA2 Y20	DYRK1A Y321	116		EGFR Y1197	GRLF1 Y1105	63		CAV1 Y14	EGFR Y1092	96
PXN Y118	DYRK1A Y321	71		GIT1 Y545	ITGB4 Y1207	70		EGFR Y1172	DSC3 Y818	142		PXN S84 Y88	BCAR1 Y249	116		BCAR1 Y234	SKT Y393	63		INSR Y1185	LDLR Y845	96
MAPK14 Y182	MPZL1 Y263	71		EGFR Y1197	ERBB2IP Y1104	70		MAPK1 T185 Y187	PTRF Y308	142		ERBB2 Y1248	MAPK1 T185 Y187	116		BCAR1 Y234	PRPF4B Y849	63		INSR Y1185	ACP1 Y132	96
ITGB4 Y1207	DSC3 Y818	71		AFAP1L2 Y413	ITGB4 Y1207	70		SHC1 Y427	DSC3 Y818	142		AFAP1L2 Y413	ALB Y164	116		FAM59A Y453	ENO1 Y44	63		ATA2 Y20	EGFR Y1197	95
ERBB2 Y1248	EFNB2 Y304	71		MAPK1 Y187	MAPK1 T185 Y187	70		DSC3 Y818	SGK223 Y413	142		EGFR Y1172	GPRC5A Y347	116		CTNND1 Y228	DSC3 Y818	63		INSR Y1189	GIT1 Y545	95
ERBB2 Y1248	SKT Y393	71		MAPK1 T185 Y187	ALB Y164	70		EGFR Y1197	CAV1 Y14	141		DSC3 Y818	INSR Y1185	116		CTNND1 Y228	ACP1 Y132	63		BCAR1 Y327	EPHA2 Y575	95
DSC3 Y818	ERBB2IP Y1104	71		MAPK3 Y204	PTPN11 Y62	70		CTNND1 Y228	DYRK1A Y321	141		SKT Y393	GSK3B Y216	116		EGFR Y1172	GRLF1 Y1105	63		CRKL Y132	LDLR Y845	95
CDK2 Y15	MPZL1 Y263	71		PXN S84 Y88	EGFR Y1197	69		PTPRA Y798	SHC1 Y349	141		CAV1 Y14	SGK223 Y413	116		MAPK1 T185 Y187	ANXA2 Y238	63		SH2D3A Y231 S218	EPHB1 Y600	95
ACP1 Y132	ALB Y164	71		PIK3R2 Y464	EPHA2 Y772	69		EFNB2 Y304	EPHA2 Y772	140		PIK3R2 Y464	EPHA2 Y772	115		INPPL1 Y986	ENO1 Y44	63		PXN Y118	SGK223 Y413	95
ERBB2 Y1248	EGFR Y1172	70		MAPK1 T185 Y187	EPHA2 Y772	69		CDK2 Y15	BCAR3 Y266	140		CTNND1 Y228	PTK2 Y397	115		INPPL1 Y986	GRLF1 Y1105	63		TNK2 Y859	EPHA2 Y588 Y594	95
EPHA2 Y588	PTK2 Y397	70		SHC1 Y349	DYRK1A Y321	69		CDK2 Y15	EPHA2 Y588	140		SHC1 Y427	MAPK14 Y182	115		EPHA2 Y772	ALB Y164	63		PTRF Y308	BCAR1 Y249	95
EFNB2 Y304	MAPK1 T185 Y187	70		STAT3 Y705	LDLR Y845	69		MAPK1 Y187	CAV1 Y14	140		EPHA2 Y772	GSK3B Y216	115		ENO1 Y44	EGFR Y1092	63		INSR Y1189	GSK3B Y216	94
PTPRA Y798	EPHA2 Y588 Y594	69		SHB Y268	ANXA2 Y238	69		BCAR1 Y387	EPHB1 Y600	140		EPHA2 Y772	ANXA2 Y238	115		GRLF1 Y1105	EGFR Y1092	63		PXN S84 Y88	PXN Y118	94
PTPRA Y798	DYRK1A Y321	69		ERBB2 Y1248	EGFR Y1172	68		SHC1 Y349	PTK2 Y576	140		GRLF1 Y1105	PTPN11 Y62	115		EPHB1 Y600	SHB Y268	63		PXN S84 Y88	AFAP1L2 Y413	94
ITGB4 Y1207	GPRC5A Y347	69		SH2D3A Y231 S218	MAPK1 Y187	68		LDLR Y845	ALB Y164	140		GSK3B Y216	BCAR1 Y249	115		ERBB2IP Y1104	PTPN11 Y62	63		PIK3R2 Y464	PXN Y118	94
INSR Y1189	EPHB1 Y600	69		RIN1 Y36	PTRF Y308	68		ATA2 Y20	EGFR Y1172	139		BCAR1 Y327	EGFR Y1172	114		ATA2 Y20	STAT3 Y704	62		PIK3R2 Y464	EPHA2 Y588 Y594	94
CTNND1 Y228	EPHA2 Y588	69		PTRF Y308	PTK2 Y397	68		EFNB2 Y304	EPHA2 Y588 Y594	139		TFRC Y20	GRLF1 Y1105	114		ATA2 Y20	ENO1 Y44	62		TFRC Y20	CTNND1 Y228	94
CTNND1 Y228	SHB Y268	69		TFRC Y20	EGFR Y1197	67		FAM59A Y453	SHB Y268	139		CDK2 Y15	CAV1 Y14	114		ATA2 Y20	STAT3 Y705	62		SHC1 Y349 Y350	EGFR Y1172	94
ANXA2 Y24	MAPK14 Y182	69		EFNB2 Y304	MPZL1 Y263	67		ATA2 Y20	SHC1 Y427	138		SHC1 Y427	ENO1 Y44	114		INSR Y1189	TNK2 Y859	62		EFNB2 Y304	CDK2 Y15	94
SGK223 Y413	GRLF1 Y1105	68		CDK2 Y15	SH2D3A Y231 S218	67		SH2D3A Y231 S218	SGK223 Y413	138		PRPF4B Y849	INSR Y1185	114		ERBB2 Y1248	MAPK1 Y187	62		EFNB2 Y304	ITGB4 Y1207	94
PTRF Y308	DYRK1A Y321	68		CDK2 Y15	EPHA2 Y588	67		CTNND1 Y228	CAV1 Y14	138		EPHB1 Y600	BCAR1 Y249	114		CRKL Y132	BCAR1 Y387	62		EFNB2 Y304	DYRK1A Y321	94
INSR Y1189	DYRK1A Y321	68		RIN1 Y36	PTPN11 Y62	67		CTNND1 Y228	PTRF Y308	138		BCAR1 Y327	CAV1 Y14	113		EFNB2 Y304	EPHA2 Y772	62		SH2D3A Y231 S218	GSK3B Y216	94
INSR Y1189	ALB Y164	68		ENO1 Y44	SGK223 Y413	67		PTPRA Y798	ANXA2 Y24	138		BCAR1 Y234	ACP1 Y132	113		GIT1 Y545	PTRF Y308	62		EPHA2 Y575	BCAR1 Y387	94
INSR Y1185	EPHB1 Y600	68		ENO1 Y44	INSR Y1185	67		PXN Y118	GSK3B Y216	138		DYRK1A Y321	EGFR Y1092	113		EGFR Y1197	MAPK14 Y182	62		PXN Y118	ANXA2 Y238	94
ERBB2 Y1248	EPHB1 Y600	68		INSR Y1185	PTPN11 Y62	67		ANXA2 Y24	MAPK1 T185 Y187	138		TFRC Y20	BCAR1 Y234	112		PTPRA Y798	PTK2 Y576	62		ERBB2 Y1248	FYN Y420	93
EPHA2 Y772	ENO1 Y44	68		EPHB1 Y600	ALB Y164	67		EGFR Y1172	PTK2 Y576	138		PTPRA Y798	GRLF1 Y1105	112		EPHA2 Y772	SKT Y393	62		SH2D3A Y231 S218	MAPK14 Y182	93
ENO1 Y44	DYRK1A Y321	68		MAPK3 Y204	GSK3B Y216	67		BCAR3 Y266	LDLR Y845	138		MAPK1 T185 Y187	ENO1 Y44	112		TNK2 Y859	INSR Y1185	62		PTPRA Y798	ACP1 Y132	93
AFAP1L2 Y413	GRLF1 Y1105	68		DYRK1A Y321	EGFR Y1092	67		CRKL Y132	ITGB4 Y1207	137		SGK223 Y413	ALB Y164	112		DSC3 Y818	MPZL1 Y263	62		RIN1 Y36	EGFR Y1172	93
SHC1 Y349 Y350	GRLF1 Y1105	67		LDLR Y845	ACP1 Y132	67		SH2D3A Y231 S218	SHC1 Y349	137		INSR Y1189	ITGB4 Y1207	111		MAPK14 Y182	SHC1 Y349	62		ENO1 Y44	ITGB4 Y1207	93
SGK223 Y413	PTK2 Y576	67		ATA2 Y20	ERBB2 Y1248	66		SHC1 Y427	PTK2 Y576	137		INSR Y1189	MAPK14 Y182	111		PTRF Y308	ALB Y164	62		INSR Y1189	MAPK14 Y182	92
PXN Y118	ENO1 Y44	67		ERBB2 Y1248	ANXA2 Y30	66		FYN Y420	LDLR Y845	137		BCAR1 Y327	ANXA2 Y24	111		DYRK1A Y321	SHB Y268	62		PIK3R2 Y464	PTPN11 Y62	92
PXN Y118	EPHB1 Y600	67		TFRC Y20	EPHA2 Y588	66		INSR Y1189	PXN Y118	136		BCAR1 Y327	SHC1 Y427	111		ATA2 Y20	GSK3B Y216	61		SH2D3A Y231 S218	LDLR Y845	92
PXN S84 Y88	MAPK14 Y182	67		CRKL Y132	MAPK1 Y187	66		PXN S84 Y88	EFNB2 Y304	136		PIK3R2 Y464	ANXA2 Y30	111		INSR Y1189	INPPL1 Y986	61		SH2D3A Y231 S218	ACP1 Y132	92
PTPRA Y798	GRLF1 Y1105	67		EGFR Y1197	STAT3 Y705	66		FAM59A Y453	EPHA2 Y588	136		TFRC Y20	FYN Y420	111		INSR Y1189	EGFR Y1092	61		PXN Y118	EPHB1 Y600	92
ITGB4 Y1207	TNK2 Y859	67		ANXA2 Y24	MPZL1 Y263	66		CTNND1 Y228	ANXA2 Y24	136		SHC1 Y349 Y350	ANXA2 Y238	111		EGFR Y1197	ENO1 Y44	61		PXN Y118	PTK2 Y397	92
ITGB4 Y1207	CAV1 Y14	67		INPPL1 Y986	DYRK1A Y321	66		PTPRA Y798	MAPK1 Y187	136		SH2D3A Y231 S218	MPZL1 Y263	111		BCAR1 Y234	EPHB1 Y600	61		MAPK1 T185 Y187	MAPK3 Y204	92
INSR Y1185	DYRK1A Y321	67		INSR Y1185	EPHA2 Y588	66		PKP3 Y176	ANXA2 Y238	136		BCAR1 Y234	LDLR Y845	111		AFAP1L2 Y413	GPRC5A Y347	61		ITGB4 Y1207	INSR Y1185	92
INSR Y1185	ALB Y164	67		SHC1 Y349	LDLR Y845	66		BCAR1 Y327	GSK3B Y216	135		PXN Y118	INPPL1 Y986	111		MAPK1 Y187	STAT3 Y705	61		SGK223 Y413	ERBB2IP Y1104	92
GIT1 Y545	PTRF Y308	67		BCAR1 Y327	FYN Y420	65		PXN Y118	INPPL1 Y986	135		INPPL1 Y986	DSC3 Y818	111		BCAR3 Y266	PTK2 Y397	61		EPHA2 Y588	ANXA2 Y238	92
EFNB2 Y304	ITGB4 Y1207	67		PIK3R2 Y464	STAT3 Y705	65		PXN Y118	EGFR Y1092	135		INPPL1 Y986	ACP1 Y132	111		INPPL1 Y986	INSR Y1185	61		ATA2 Y20	LDLR Y845	91
DYRK1A Y321	ANXA2 Y238	67		CDK2 Y15	ALB Y164	65		AFAP1L2 Y413	SHC1 Y349	135		INPPL1 Y986	PTPN11 Y62	111		EPHA2 Y772	ITGB4 Y1207	61		ATA2 Y20	ANXA2 Y238	91
CDK2 Y15	PXN Y118	67		SKT Y393	LDLR Y845	65		MAPK1 T185 Y187	SHB Y268	135		EPHA2 Y772	ALB Y164	111		INSR Y1185	EGFR Y1092	61		INSR Y1189	LDLR Y845	91
STAT3 Y704	CTNND1 Y228	66		MAPK14 Y182	EPHB1 Y600	65		SKT Y393	SHB Y268	135		EPHA2 Y588	SHB Y268	111		ACP1 Y132	MPZL1 Y263	61		PIK3R2 Y464	ALB Y164	91
SKT Y393	PTRF Y308	66		BCAR1 Y234	FYN Y420	64		SHC1 Y349	ANXA2 Y238	135		INSR Y1189	DYRK1A Y321	110		INSR Y1189	EGFR Y1172	60		EFNB2 Y304	ANXA2 Y30	91
PXN Y118	PRPF4B Y849	66		PTPRA Y798	EPHA2 Y588 Y594	64		PTRF Y308	ANXA2 Y238	135		EGFR Y1197	ANXA2 Y30	110		INSR Y1189	MAPK1 T185 Y187	60		EFNB2 Y304	ANXA2 Y238	91
PTPRA Y798	MPZL1 Y263	66		MAPK1 Y187	PTRF Y308	64		PIK3R2 Y464	EGFR Y1197	134		RIN1 Y36	SHB Y268	110		INSR Y1189	SHC1 Y427	60		EPHA2 Y575	BCAR1 Y234	91
PRPF4B Y849	DYRK1A Y321	66		MAPK1 T185 Y187	SHC1 Y349	64		SH2D3A Y231 S218	EGFR Y1172	134		EGFR Y1172	ENO1 Y44	110		STAT3 Y704	ANXA2 Y24	60		GIT1 Y545	PXN Y118	91
PIK3R2 Y464	AFAP1L2 Y413	66		EPHA2 Y772	DYRK1A Y321	64		SH2D3A Y231 S218	SHC1 Y427	134		ANXA2 Y30	INPPL1 Y986	110		STAT3 Y704	MAPK1 Y187	60		ANXA2 Y24	MPZL1 Y263	91
ERBB2 Y1248	ACP1 Y132	66		EPHA2 Y772	ANXA2 Y238	64		RIN1 Y36	ENO1 Y44	134		INPPL1 Y986	LDLR Y845	110		CRKL Y132	FYN Y420	60		INPPL1 Y986	TNK2 Y859	91
EPHB1 Y600	PTK2 Y576	66		ITGB4 Y1207	MPZL1 Y263	64		BCAR1 Y327	GIT1 Y545	133		ENO1 Y44	ANXA2 Y238	110		CRKL Y132	GPRC5A Y347	60		INPPL1 Y986	ACP1 Y132	91
EPHA2 Y588	GPRC5A Y347	66		EPHA2 Y588 Y594	EPHB1 Y600	64		GIT1 Y545	PXN Y118	133		SGK223 Y413	ERBB2IP Y1104	110		SH2D3A Y231 S218	DSC3 Y818	60		PRPF4B Y849	ERBB2IP Y1104	91
CTNND1 Y228	STAT3 Y705	66		MAPK14 Y182	MAPK3 Y204	64		RIN1 Y36	PTK2 Y397	133		MAPK14 Y182	MAPK3 Y204	110		CTNND1 Y228	EGFR Y1172	60		EPHB1 Y600	DYRK1A Y321	91
ANXA2 Y30	ERBB2IP Y1104	66		STAT3 Y705	ANXA2 Y238	64		BCAR3 Y266	SGK223 Y413	133		PIK3R2 Y464	ENO1 Y44	109		PTPRA Y798	DYRK1A Y321	60		EPHB1 Y600	PTPN11 Y62	91
PXN S84 Y88	PXN Y118	65		FYN Y420	BCAR1 Y249	64		ITGB4 Y1207	INSR Y1185	133		CRKL Y132	DYRK1A Y321	109		AFAP1L2 Y413	BCAR1 Y387	60		INSR Y1189	FYN Y420	90
PTRF Y308	LDLR Y845	65		INSR Y1189	EPHA2 Y588	63		SHB Y268	PTPN11 Y62	133		GIT1 Y545	ENO1 Y44	109		AFAP1L2 Y413	PTPN11 Y62	60		PIK3R2 Y464	ENO1 Y44	90
PTPRA Y798	EPHB1 Y600	65		INSR Y1189	PTPN11 Y62	63		EGFR Y1197	DSC3 Y818	132		GIT1 Y545	MAPK3 Y204	109		ANXA2 Y24	STAT3 Y705	60		TFRC Y20	TNK2 Y859	90
PIK3R2 Y464	SGK223 Y413	65		PIK3R2 Y464	MAPK14 Y182	63		AFAP1L2 Y413	EGFR Y1172	132		CTNND1 Y228	PTPRA Y798	109		EGFR Y1172	INSR Y1185	60		CDK2 Y15	INSR Y1185	90
MPZL1 Y263	PTPN11 Y62	65		CRKL Y132	SH2D3A Y231 S218	63		AFAP1L2 Y413	SHC1 Y427	132		PXN Y118	BCAR1 Y249	109		EGFR Y1172	GPRC5A Y347	60		EGFR Y1197	TNK2 Y859	90
MAPK1 T185 Y187	EPHB1 Y600	65		EFNB2 Y304	SGK223 Y413	63		EGFR Y1172	ANXA2 Y238	132		ANXA2 Y30	PRPF4B Y849	109		BCAR3 Y266	PTK2 Y576	60		EGFR Y1172	DSC3 Y818	90
INSR Y1189	GSK3B Y216	65		EPHA2 Y575	MAPK14 Y182	63		BCAR3 Y266	ALB Y164	132		INPPL1 Y986	ITGB4 Y1207	109		MAPK1 T185 Y187	INSR Y1185	60		SHC1 Y427	MAPK3 Y204	90
INSR Y1185	GSK3B Y216	65		CTNND1 Y228	LDLR Y845	63		MAPK1 T185 Y187	EPHA2 Y588	132		ENO1 Y44	ITGB4 Y1207	109		SHC1 Y427	INSR Y1185	60		ENO1 Y44	EGFR Y1092	90
CTNND1 Y228	LDLR Y845	65		EGFR Y1172	DYRK1A Y321	63		SHC1 Y427	ANXA2 Y238	132		SGK223 Y413	GPRC5A Y347	109		EPHA2 Y772	SGK223 Y413	60		PTK2 Y397	ALB Y164	90
TFRC Y20	RIN1 Y36	64		ENO1 Y44	LDLR Y845	63		GRLF1 Y1105	PTK2 Y397	132		GRLF1 Y1105	DYRK1A Y321	109		EPHA2 Y772	PRPF4B Y849	60		PIK3R2 Y464	GPRC5A Y347	89
PTK2 Y397	PTPN11 Y62	64		BCAR1 Y387	FYN Y420	63		AFAP1L2 Y413	INPPL1 Y986	131		STAT3 Y704	ERBB2 Y1248	108		CAV1 Y14	MAPK14 Y182	60		SH2D3A Y231 S218	FYN Y420	89
PIK3R2 Y464	SKT Y393	64		INSR Y1185	MAPK14 Y182	63		AFAP1L2 Y413	EGFR Y1092	131		ERBB2 Y1248	BCAR1 Y327	108		EPHA2 Y588	ERBB2IP Y1104	60		INPPL1 Y986	CAV1 Y14	89
ITGB4 Y1207	EGFR Y1092	64		INSR Y1185	ACP1 Y132	63		INPPL1 Y986	ANXA2 Y238	131		BCAR1 Y327	AFAP1L2 Y413	108		PXN S84 Y88	FYN Y420	59		INSR Y1185	PTK2 Y397	89
GSK3B Y216	SHB Y268	64		EPHB1 Y600	LDLR Y845	63		EPHB1 Y600	SHB Y268	131		TFRC Y20	ANXA2 Y24	108		ERBB2 Y1248	PTRF Y308	59		MAPK14 Y182	DYRK1A Y321	89
GRLF1 Y1105	EPHA2 Y588	64		GSK3B Y216	MPZL1 Y263	63		MAPK3 Y204	PTK2 Y576	131		CRKL Y132	SH2D3A Y231 S218	108		CRKL Y132	PKP3 Y176	59		MAPK3 Y204	ANXA2 Y238	89
FAM59A Y453	GPRC5A Y347	64		INSR Y1189	ENO1 Y44	62		EGFR Y1092	ANXA2 Y238	131		BCAR1 Y234	DYRK1A Y321	108		SHC1 Y349 Y350	PTRF Y308	59		MPZL1 Y263	SHB Y268	89
EPHA2 Y772	DYRK1A Y321	64		INSR Y1189	MAPK14 Y182	62		CTNND1 Y228	SHB Y268	130		RIN1 Y36	BCAR1 Y249	108		CDK2 Y15	PTPRA Y798	59		BCAR1 Y327	INSR Y1185	88
EGFR Y1197	MAPK1 T185 Y187	64		INSR Y1189	PTK2 Y397	62		PTPRA Y798	PKP3 Y176	129		SHC1 Y427	PTRF Y308	108		EPHA2 Y575	BCAR1 Y234	59		PIK3R2 Y464	MAPK3 Y204	88
EGFR Y1172	ITGB4 Y1207	64		ERBB2 Y1248	STAT3 Y705	62		PXN Y118	RIN1 Y36	129		SHC1 Y349	EGFR Y1092	108		EPHA2 Y575	ANXA2 Y238	59		EFNB2 Y304	LDLR Y845	88
CRKL Y132	CDK2 Y15	64		PTPRA Y798	ITGB4 Y1207	62		ENO1 Y44	MPZL1 Y263	129		FYN Y420	ACP1 Y132	108		PTPRA Y798	BCAR3 Y266	59		CDK2 Y15	SH2D3A Y231 S218	88
ALB Y164	PTK2 Y576	64		EPHA2 Y588	SHB Y268	62		INSR Y1185	ANXA2 Y238	129		ERBB2IP Y1104	ANXA2 Y238	108		MAPK1 Y187	MAPK14 Y182	59		SH2D3A Y231 S218	ITGB4 Y1207	88
TFRC Y20	ENO1 Y44	63		PXN S84 Y88	EPHB1 Y600	61		ATA2 Y20	EGFR Y1197	128		INSR Y1189	GSK3B Y216	107		EGFR Y1172	ENO1 Y44	59		GIT1 Y545	MAPK3 Y204	88
SH2D3A Y231 S218	EPHA2 Y772	63		STAT3 Y704	LDLR Y845	61		BCAR3 Y266	EPHA2 Y588	128		PXN S84 Y88	EGFR Y1197	107		ANXA2 Y30	ACP1 Y132	59		EGFR Y1197	GSK3B Y216	88
ITGB4 Y1207	INSR Y1185	63		PIK3R2 Y464	RIN1 Y36	61		ANXA2 Y30	MAPK14 Y182	128		CRKL Y132	BCAR1 Y234	107		EPHA2 Y772	EPHB1 Y600	59		MAPK1 Y187	MAPK1 T185 Y187	88
INSR Y1189	ITGB4 Y1207	63		EFNB2 Y304	AFAP1L2 Y413	61		ENO1 Y44	SHC1 Y349	128		SH2D3A Y231 S218	SHB Y268	107		TFRC Y20	BCAR1 Y387	58		BCAR1 Y387	INSR Y1185	88
INPPL1 Y986	ITGB4 Y1207	63		FAM59A Y453	EPHA2 Y588	61		ITGB4 Y1207	GPRC5A Y347	128		CTNND1 Y228	DYRK1A Y321	107		EGFR Y1197	CTNND1 Y228	58		EPHB1 Y600	MAPK3 Y204	88
GPRC5A Y347	PTPN11 Y62	63		RIN1 Y36	ANXA2 Y238	61		SHB Y268	ALB Y164	128		AFAP1L2 Y413	EPHA2 Y772	107		FAM59A Y453	PXN Y118	58		PTRF Y308	EPHA2 Y588	88
EFNB2 Y304	PTRF Y308	63		SKT Y393	DYRK1A Y321	61		INSR Y1189	ANXA2 Y238	127		ANXA2 Y30	ENO1 Y44	107		PRPF4B Y849	FYN Y420	58		INSR Y1189	CDK2 Y15	87
EFNB2 Y304	PTK2 Y397	63		MAPK14 Y182	PTPN11 Y62	61		SH2D3A Y231 S218	CTNND1 Y228	127		SGK223 Y413	PTRF Y308	107		GSK3B Y216	MPZL1 Y263	58		INSR Y1189	SHC1 Y349	87
CDK2 Y15	SH2D3A Y231 S218	63		CRKL Y132	EPHB1 Y600	60		EGFR Y1197	PTK2 Y576	127		SGK223 Y413	LDLR Y845	107		BCAR1 Y249	ANXA2 Y238	58		PXN S84 Y88	GIT1 Y545	87
CDK2 Y15	DYRK1A Y321	63		EFNB2 Y304	GIT1 Y545	60		PTPRA Y798	INSR Y1185	127		BCAR1 Y327	INPPL1 Y986	106		PXN S84 Y88	SHC1 Y349	57		PTPRA Y798	ITGB4 Y1207	87
PTPRA Y798	ALB Y164	62		GIT1 Y545	PTK2 Y576	60		PXN Y118	PRPF4B Y849	127		PIK3R2 Y464	INPPL1 Y986	106		PXN S84 Y88	GPRC5A Y347	57		PXN Y118	FYN Y420	87
PIK3R2 Y464	FAM59A Y453	62		EGFR Y1197	SHB Y268	60		SH2D3A Y231 S218	EGFR Y1197	126		BCAR1 Y234	PRPF4B Y849	106		BCAR1 Y327	PTPRA Y798	57		ITGB4 Y1207	MAPK3 Y204	87
PIK3R2 Y464	PTK2 Y576	62		PTPRA Y798	INSR Y1185	60		SHC1 Y349 Y350	SH2D3A Y231 S218	125		BCAR1 Y234	PTPN11 Y62	106		TFRC Y20	EPHA2 Y575	57		EPHB1 Y600	GPRC5A Y347	87
MAPK1 T185 Y187	TNK2 Y859	62		PXN Y118	INSR Y1185	60		FAM59A Y453	INPPL1 Y986	125		EPHA2 Y772	DSC3 Y818	106		CRKL Y132	FAM59A Y453	57		MAPK3 Y204	ACP1 Y132	87
ERBB2 Y1248	PTPRA Y798	62		MAPK1 T185 Y187	LDLR Y845	60		FAM59A Y453	EGFR Y1092	125		ENO1 Y44	PRPF4B Y849	106		CRKL Y132	EPHA2 Y772	57		SHC1 Y349 Y350	SGK223 Y413	86
ERBB2 Y1248	STAT3 Y705	62		SGK223 Y413	ACP1 Y132	60		CTNND1 Y228	EPHA2 Y588	125		ITGB4 Y1207	FYN Y420	106		CRKL Y132	SKT Y393	57		SHC1 Y349 Y350	MPZL1 Y263	86
CDK2 Y15	ACP1 Y132	62		PRPF4B Y849	LDLR Y845	60		PXN Y118	LDLR Y845	125		TNK2 Y859	GSK3B Y216	106		EFNB2 Y304	PTPRA Y798	57		CDK2 Y15	DSC3 Y818	86
BCAR1 Y327	GIT1 Y545	62		INSR Y1189	ACP1 Y132	59		EGFR Y1172	ENO1 Y44	125		INSR Y1185	MPZL1 Y263	106		GIT1 Y545	BCAR1 Y249	57		GIT1 Y545	DYRK1A Y321	86
STAT3 Y704	ERBB2 Y1248	61		EFNB2 Y304	EGFR Y1197	59		MAPK1 T185 Y187	SHC1 Y427	125		GSK3B Y216	ERBB2IP Y1104	106		FAM59A Y453	ITGB4 Y1207	57		PXN Y118	GSK3B Y216	86
PTRF Y308	ALB Y164	61		EGFR Y1197	FAM59A Y453	59		SHC1 Y427	ENO1 Y44	125		PXN S84 Y88	RIN1 Y36	105		CTNND1 Y228	MAPK14 Y182	57		ENO1 Y44	FYN Y420	86
PTK2 Y397	ALB Y164	61		AFAP1L2 Y413	PTK2 Y576	59		ATA2 Y20	PTPRA Y798	124		PIK3R2 Y464	ERBB2IP Y1104	105		AFAP1L2 Y413	FYN Y420	57		ACP1 Y132	ERBB2IP Y1104	86
GRLF1 Y1105	EPHB1 Y600	61		ENO1 Y44	EPHB1 Y600	59		CRKL Y132	RIN1 Y36	124		AFAP1L2 Y413	RIN1 Y36	105		ENO1 Y44	GPRC5A Y347	57		ATA2 Y20	EGFR Y1092	85
DYRK1A Y321	PTPN11 Y62	61		ENO1 Y44	ALB Y164	59		EFNB2 Y304	SHB Y268	124		ANXA2 Y24	INSR Y1185	105		ITGB4 Y1207	MAPK3 Y204	57		INSR Y1189	CRKL Y132	85
DSC3 Y818	SKT Y393	61		ITGB4 Y1207	GPRC5A Y347	59		PXN Y118	MPZL1 Y263	124		EGFR Y1172	ANXA2 Y30	105		PRPF4B Y849	GRLF1 Y1105	57		PXN S84 Y88	PIK3R2 Y464	85
CRKL Y132	PXN Y118	61		EPHB1 Y600	MPZL1 Y263	59		BCAR3 Y266	PTPN11 Y62	124		SHC1 Y427	BCAR1 Y249	105		EPHB1 Y600	ERBB2IP Y1104	57		PXN S84 Y88	MAPK3 Y204	85
PTRF Y308	PTPN11 Y62	60		GSK3B Y216	PTK2 Y397	59		ERBB2 Y1248	TNK2 Y859	123		SGK223 Y413	ACP1 Y132	105		SHB Y268	ANXA2 Y238	57		SHC1 Y349 Y350	FYN Y420	85
PTK2 Y397	SHB Y268	60		PTK2 Y397	PTPN11 Y62	59		BCAR1 Y387	SHB Y268	123		EPHA2 Y588 Y594	INSR Y1185	105		SHB Y268	PTK2 Y576	57		CDK2 Y15	EGFR Y1092	85
ITGB4 Y1207	SKT Y393	60		ATA2 Y20	MPZL1 Y263	58		GRLF1 Y1105	PTRF Y308	123		INSR Y1189	EGFR Y1197	104		INSR Y1189	CRKL Y132	56		PXN Y118	LDLR Y845	85
ITGB4 Y1207	PTK2 Y397	60		PXN S84 Y88	INSR Y1185	58		MAPK14 Y182	LDLR Y845	123		ERBB2 Y1248	SHB Y268	104		ERBB2 Y1248	GRLF1 Y1105	56		PXN Y118	ACP1 Y132	85
ERBB2 Y1248	EGFR Y1092	60		STAT3 Y704	PIK3R2 Y464	58		BCAR1 Y327	CDK2 Y15	122		SHC1 Y349 Y350	GPRC5A Y347	104		PIK3R2 Y464	ANXA2 Y30	56		AFAP1L2 Y413	SKT Y393	85
ENO1 Y44	ALB Y164	60		PTPRA Y798	MPZL1 Y263	58		BCAR1 Y327	PTPN11 Y62	122		CDK2 Y15	SH2D3A Y231 S218	104		CRKL Y132	INSR Y1185	56		ANXA2 Y24	TNK2 Y859	85
DYRK1A Y321	PTK2 Y397	60		PXN Y118	EPHB1 Y600	58		EGFR Y1197	AFAP1L2 Y413	122		ANXA2 Y24	LDLR Y845	104		SH2D3A Y231 S218	ANXA2 Y30	56		INPPL1 Y986	SKT Y393	85
PXN S84 Y88	PKP3 Y176	59		MAPK1 Y187	SGK223 Y413	58		EGFR Y1197	ANXA2 Y238	122		ANXA2 Y30	TNK2 Y859	104		SH2D3A Y231 S218	LDLR Y845	56		ENO1 Y44	EPHB1 Y600	85
PIK3R2 Y464	CTNND1 Y228	59		ANXA2 Y30	MPZL1 Y263	58		PXN Y118	TNK2 Y859	122		INPPL1 Y986	ANXA2 Y238	104		GIT1 Y545	EPHA2 Y588	56		MAPK3 Y204	GSK3B Y216	85
MAPK3 Y204	PTRF Y308	59		PKP3 Y176	MPZL1 Y263	58		INPPL1 Y986	ENO1 Y44	122		DSC3 Y818	EPHA2 Y588	104		BCAR1 Y234	AFAP1L2 Y413	56		PTRF Y308	EGFR Y1092	85
MAPK1 Y187	PTRF Y308	59		INSR Y1189	DYRK1A Y321	57		ENO1 Y44	EGFR Y1092	122		CRKL Y132	CTNND1 Y228	103		BCAR1 Y234	GSK3B Y216	56		EPHA2 Y588	MPZL1 Y263	85
MAPK1 T185 Y187	ANXA2 Y238	59		STAT3 Y704	ERBB2 Y1248	57		SHC1 Y349	PTK2 Y397	122		CRKL Y132	PTPRA Y798	103		CTNND1 Y228	INPPL1 Y986	56		CRKL Y132	SH2D3A Y231 S218	84
LDLR Y845	PTK2 Y397	59		STAT3 Y704	ANXA2 Y238	57		TFRC Y20	BCAR1 Y387	121		CRKL Y132	AFAP1L2 Y413	103		CTNND1 Y228	EGFR Y1092	56		PXN Y118	ITGB4 Y1207	84
GPRC5A Y347	ALB Y164	59		ERBB2 Y1248	GRLF1 Y1105	57		CRKL Y132	SHC1 Y349	121		CRKL Y132	EPHA2 Y588	103		PTPRA Y798	SHC1 Y427	56		EGFR Y1172	EPHA2 Y588 Y594	84
ERBB2 Y1248	INPPL1 Y986	59		PIK3R2 Y464	MAPK1 Y187	57		ITGB4 Y1207	FYN Y420	121		ANXA2 Y24	INPPL1 Y986	103		PXN Y118	FYN Y420	56		ITGB4 Y1207	EPHA2 Y588	84
ENO1 Y44	SKT Y393	59		GIT1 Y545	PXN Y118	57		CAV1 Y14	GRLF1 Y1105	121		ANXA2 Y30	SHC1 Y349	103		PXN Y118	ACP1 Y132	56		CAV1 Y14	ACP1 Y132	84
DYRK1A Y321	EPHA2 Y588	59		MAPK1 Y187	DYRK1A Y321	57		MAPK14 Y182	PTRF Y308	121		ANXA2 Y30	GPRC5A Y347	103		RIN1 Y36	GSK3B Y216	56		PTRF Y308	SHB Y268	84
DYRK1A Y321	LDLR Y845	59		EPHB1 Y600	ACP1 Y132	57		SHB Y268	ERBB2IP Y1104	121		SKT Y393	ALB Y164	103		BCAR3 Y266	EPHA2 Y588	56		FYN Y420	PTK2 Y576	84
CTNND1 Y228	GPRC5A Y347	59		INSR Y1189	PXN S84 Y88	56		SH2D3A Y231 S218	INPPL1 Y986	120		PRPF4B Y849	ALB Y164	103		BCAR3 Y266	SHB Y268	56		INSR Y1189	TFRC Y20	83
CRKL Y132	GIT1 Y545	59		CDK2 Y15	AFAP1L2 Y413	56		SH2D3A Y231 S218	EGFR Y1092	120		EPHA2 Y588 Y594	ALB Y164	103		INPPL1 Y986	GSK3B Y216	56		PXN S84 Y88	MAPK1 Y187	83
SHC1 Y349 Y350	MAPK14 Y182	58		SH2D3A Y231 S218	MAPK14 Y182	56		ITGB4 Y1207	PTK2 Y397	120		INSR Y1185	ANXA2 Y238	103		ENO1 Y44	GRLF1 Y1105	56		PXN S84 Y88	DSC3 Y818	83
SHC1 Y349 Y350	ERBB2IP Y1104	58		PTPRA Y798	LDLR Y845	56		GRLF1 Y1105	ACP1 Y132	120		MAPK14 Y182	LDLR Y845	103		ITGB4 Y1207	FYN Y420	56		ERBB2 Y1248	MAPK1 T185 Y187	83
SHB Y268	ALB Y164	58		MAPK1 T185 Y187	PTK2 Y397	56		TFRC Y20	CTNND1 Y228	119		PXN S84 Y88	PXN Y118	102		SHC1 Y349	PKP3 Y176	56		ERBB2 Y1248	EPHA2 Y588	83
RIN1 Y36	ACP1 Y132	58		EPHA2 Y772	SGK223 Y413	56		CRKL Y132	EGFR Y1172	119		TFRC Y20	EGFR Y1197	102		GSK3B Y216	EGFR Y1092	56		BCAR1 Y327	EPHB1 Y600	83
PXN Y118	GRLF1 Y1105	58		PRPF4B Y849	INSR Y1185	56		EGFR Y1172	PTK2 Y397	119		TFRC Y20	MAPK14 Y182	102		INSR Y1189	SHC1 Y349 Y350	55		TFRC Y20	MAPK3 Y204	83
PXN S84 Y88	RIN1 Y36	58		EPHA2 Y588 Y594	MAPK14 Y182	56		BCAR3 Y266	PRPF4B Y849	119		SHC1 Y349 Y350	PTPN11 Y62	102		STAT3 Y704	SHC1 Y427	55		SH2D3A Y231 S218	SHC1 Y349	83
PTPRA Y798	ACP1 Y132	58		MAPK14 Y182	ANXA2 Y238	56		SHC1 Y427	PTK2 Y397	119		BCAR1 Y234	DSC3 Y818	102		BCAR1 Y327	PTK2 Y397	55		EPHA2 Y575	GRLF1 Y1105	83
MAPK14 Y182	SHC1 Y349	58		EPHB1 Y600	EPHA2 Y588	56		CRKL Y132	SHC1 Y427	118		CTNND1 Y228	ACP1 Y132	102		BCAR1 Y327	SHB Y268	55		EGFR Y1197	PKP3 Y176	83
EPHA2 Y772	ALB Y164	58		EPHB1 Y600	PTK2 Y397	56		EGFR Y1172	MAPK1 T185 Y187	118		PTPRA Y798	PTPN11 Y62	102		SHC1 Y349 Y350	GRLF1 Y1105	55		ANXA2 Y30	ACP1 Y132	83
EPHA2 Y575	PTPRA Y798	58		INSR Y1189	CRKL Y132	55		BCAR3 Y266	GSK3B Y216	118		ANXA2 Y24	PKP3 Y176	102		SHC1 Y349 Y350	INSR Y1185	55		ENO1 Y44	SKT Y393	83
DYRK1A Y321	GPRC5A Y347	58		INSR Y1189	PXN Y118	55		BCAR3 Y266	ANXA2 Y238	118		ANXA2 Y24	PTPN11 Y62	102		PTPRA Y798	EPHB1 Y600	55		PRPF4B Y849	PKP3 Y176	83
ANXA2 Y30	SKT Y393	58		CRKL Y132	INSR Y1185	55		ITGB4 Y1207	LDLR Y845	118		ATA2 Y20	INSR Y1189	101		EGFR Y1172	MAPK14 Y182	55		MAPK14 Y182	PTRF Y308	83
PXN S84 Y88	PTK2 Y397	57		CDK2 Y15	GIT1 Y545	55		ATA2 Y20	GRLF1 Y1105	117		SHC1 Y349 Y350	LDLR Y845	101		MAPK1 T185 Y187	PTRF Y308	55		MAPK3 Y204	LDLR Y845	83
PTPRA Y798	PTK2 Y576	57		GIT1 Y545	ENO1 Y44	55		INSR Y1189	MAPK3 Y204	117		SH2D3A Y231 S218	PTRF Y308	101		SHC1 Y427	STAT3 Y705	55		EGFR Y1092	ANXA2 Y238	83
PIK3R2 Y464	EPHA2 Y575	57		PXN Y118	AFAP1L2 Y413	55		STAT3 Y704	PXN Y118	117		EPHA2 Y575	ERBB2IP Y1104	101		SGK223 Y413	PTRF Y308	55		TFRC Y20	SH2D3A Y231 S218	82
PIK3R2 Y464	MAPK1 T185 Y187	57		AFAP1L2 Y413	ENO1 Y44	55		CDK2 Y15	ALB Y164	117		AFAP1L2 Y413	ERBB2IP Y1104	101		SGK223 Y413	FYN Y420	55		BCAR1 Y234	ANXA2 Y238	82
PIK3R2 Y464	EPHA2 Y588 Y594	57		PRPF4B Y849	DYRK1A Y321	55		ENO1 Y44	LDLR Y845	117		RIN1 Y36	TNK2 Y859	101		PTRF Y308	FYN Y420	55		BCAR3 Y266	PTRF Y308	82
ITGB4 Y1207	LDLR Y845	57		INSR Y1185	DYRK1A Y321	55		INSR Y1189	RIN1 Y36	116		RIN1 Y36	GSK3B Y216	101		PTRF Y308	PTK2 Y397	55		MAPK1 T185 Y187	ALB Y164	82
ITGB4 Y1207	PTPN11 Y62	57		PXN S84 Y88	CTNND1 Y228	54		EFNB2 Y304	ACP1 Y132	116		EGFR Y1172	GSK3B Y216	101		ACP1 Y132	BCAR1 Y249	55		ENO1 Y44	PRPF4B Y849	82
GRLF1 Y1105	PTPN11 Y62	57		PIK3R2 Y464	ANXA2 Y24	54		SGK223 Y413	SHB Y268	116		ENO1 Y44	CAV1 Y14	101		INSR Y1189	PXN S84 Y88	54		ENO1 Y44	DYRK1A Y321	82
GPRC5A Y347	LDLR Y845	57		PIK3R2 Y464	GRLF1 Y1105	54		BCAR1 Y387	ACP1 Y132	116		SGK223 Y413	PKP3 Y176	101		PXN S84 Y88	PIK3R2 Y464	54		EPHB1 Y600	BCAR1 Y249	82
FAM59A Y453	SHB Y268	57		PXN Y118	SGK223 Y413	54		ATA2 Y20	INPPL1 Y986	115		SGK223 Y413	EGFR Y1092	101		PXN S84 Y88	INSR Y1185	54		ATA2 Y20	INPPL1 Y986	81
DYRK1A Y321	FYN Y420	57		PXN Y118	PTK2 Y397	54		ATA2 Y20	EGFR Y1092	115		PRPF4B Y849	ERBB2IP Y1104	101		STAT3 Y704	ERBB2 Y1248	54		CRKL Y132	ITGB4 Y1207	81
PXN S84 Y88	CDK2 Y15	56		ANXA2 Y24	LDLR Y845	54		PXN S84 Y88	ITGB4 Y1207	115		GRLF1 Y1105	MPZL1 Y263	101		PIK3R2 Y464	PTK2 Y397	54		EGFR Y1197	ANXA2 Y24	81
PTK2 Y397	ANXA2 Y238	56		MAPK1 T185 Y187	SGK223 Y413	54		PXN S84 Y88	BCAR1 Y387	115		GSK3B Y216	FYN Y420	101		CRKL Y132	BCAR1 Y234	54		EGFR Y1197	SHC1 Y349	81
PRPF4B Y849	INSR Y1185	56		EPHA2 Y588 Y594	GRLF1 Y1105	54		STAT3 Y704	ERBB2 Y1248	115		DYRK1A Y321	ALB Y164	101		EFNB2 Y304	CTNND1 Y228	54		ANXA2 Y24	SHC1 Y427	81
MAPK1 T185 Y187	INPPL1 Y986	56		MAPK14 Y182	PTK2 Y397	54		EGFR Y1197	ENO1 Y44	115		EPHA2 Y588	PTPN11 Y62	101		AFAP1L2 Y413	CAV1 Y14	54		INPPL1 Y986	DSC3 Y818	81
MAPK1 T185 Y187	EGFR Y1092	56		INSR Y1189	PTPRA Y798	53		FAM59A Y453	PXN Y118	115		INSR Y1189	PIK3R2 Y464	100		MAPK1 T185 Y187	SHC1 Y427	54		MAPK3 Y204	FYN Y420	81
ITGB4 Y1207	EPHB1 Y600	56		PXN S84 Y88	EGFR Y1172	53		AFAP1L2 Y413	MAPK1 T185 Y187	115		CRKL Y132	ITGB4 Y1207	100		MAPK1 T185 Y187	EPHA2 Y588	54		TFRC Y20	SHC1 Y349	80
INSR Y1189	PRPF4B Y849	56		CDK2 Y15	PTRF Y308	53		MAPK1 T185 Y187	INPPL1 Y986	115		CRKL Y132	GRLF1 Y1105	100		SHC1 Y427	MAPK14 Y182	54		EGFR Y1197	ERBB2IP Y1104	80
GIT1 Y545	BCAR1 Y387	56		AFAP1L2 Y413	MAPK1 T185 Y187	53		MAPK1 T185 Y187	EGFR Y1092	115		CRKL Y132	GSK3B Y216	100		EPHA2 Y772	GSK3B Y216	54		AFAP1L2 Y413	DYRK1A Y321	80
ERBB2 Y1248	EGFR Y1197	56		MAPK1 Y187	ANXA2 Y238	53		ANXA2 Y30	MPZL1 Y263	115		CDK2 Y15	PTPRA Y798	100		DSC3 Y818	MAPK14 Y182	54		SHC1 Y427	INPPL1 Y986	80
EPHA2 Y772	PTK2 Y576	56		SHC1 Y427	MPZL1 Y263	53		SKT Y393	LDLR Y845	115		FAM59A Y453	MAPK3 Y204	100		PRPF4B Y849	MPZL1 Y263	54		ENO1 Y44	EPHA2 Y588 Y594	80
EGFR Y1172	MAPK1 T185 Y187	56		SGK223 Y413	EPHB1 Y600	53		BCAR1 Y234	BCAR1 Y387	114		CTNND1 Y228	MPZL1 Y263	100		PTRF Y308	DYRK1A Y321	54		DSC3 Y818	GPRC5A Y347	80
CTNND1 Y228	PTPN11 Y62	56		INSR Y1185	PTRF Y308	53		PTPRA Y798	LDLR Y845	114		ITGB4 Y1207	GPRC5A Y347	100		ATA2 Y20	CTNND1 Y228	53		ATA2 Y20	ANXA2 Y24	79
CRKL Y132	ERBB2IP Y1104	56		EPHB1 Y600	PTPN11 Y62	53		ITGB4 Y1207	CAV1 Y14	114		SGK223 Y413	FYN Y420	100		PXN S84 Y88	FAM59A Y453	53		PXN S84 Y88	ALB Y164	79
ANXA2 Y24	ACP1 Y132	56		ACP1 Y132	ALB Y164	53		SHC1 Y349 Y350	ITGB4 Y1207	113		GPRC5A Y347	ANXA2 Y238	100		PXN S84 Y88	BCAR1 Y387	53		TFRC Y20	FYN Y420	79
TFRC Y20	GPRC5A Y347	55		ATA2 Y20	PIK3R2 Y464	52		PXN Y118	SHC1 Y349	113		PXN S84 Y88	GIT1 Y545	99		CTNND1 Y228	MPZL1 Y263	53		SHC1 Y349 Y350	AFAP1L2 Y413	79
SKT Y393	GPRC5A Y347	55		INSR Y1189	PRPF4B Y849	52		PXN Y118	EPHA2 Y588	113		ERBB2 Y1248	STAT3 Y705	99		PTPRA Y798	MAPK1 T185 Y187	53		CDK2 Y15	PXN Y118	79
RIN1 Y36	MAPK1 Y187	55		PIK3R2 Y464	CDK2 Y15	52		RIN1 Y36	GPRC5A Y347	113		PIK3R2 Y464	GPRC5A Y347	99		PTPRA Y798	EPHA2 Y588	53		CDK2 Y15	MAPK3 Y204	79
RIN1 Y36	MAPK3 Y204	55		PIK3R2 Y464	ANXA2 Y30	52		ANXA2 Y30	DYRK1A Y321	113		TFRC Y20	SHC1 Y349 Y350	99		AFAP1L2 Y413	RIN1 Y36	53		GIT1 Y545	SGK223 Y413	79
PXN S84 Y88	ANXA2 Y24	55		CRKL Y132	EPHA2 Y588	52		ENO1 Y44	EPHA2 Y588	113		CRKL Y132	BCAR3 Y266	99		RIN1 Y36	MAPK14 Y182	53		EGFR Y1197	SHC1 Y427	79
PRPF4B Y849	MPZL1 Y263	55		EFNB2 Y304	LDLR Y845	52		EPHB1 Y600	LDLR Y845	113		SHC1 Y349 Y350	ENO1 Y44	99		ENO1 Y44	TNK2 Y859	53		EGFR Y1172	PTRF Y308	79
MAPK14 Y182	PKP3 Y176	55		EFNB2 Y304	PTK2 Y397	52		EGFR Y1197	MAPK14 Y182	112		SH2D3A Y231 S218	BCAR1 Y387	99		PRPF4B Y849	PTPN11 Y62	53		SHC1 Y427	ENO1 Y44	79
GRLF1 Y1105	PTK2 Y397	55		GIT1 Y545	MAPK1 T185 Y187	52		RIN1 Y36	MAPK14 Y182	112		PTPRA Y798	DSC3 Y818	99		PTRF Y308	SHB Y268	53		ANXA2 Y30	INPPL1 Y986	79
GRLF1 Y1105	ERBB2IP Y1104	55		EGFR Y1197	MAPK1 T185 Y187	52		ENO1 Y44	PTK2 Y576	112		MAPK1 Y187	ENO1 Y44	99		INSR Y1189	MAPK3 Y204	52		TNK2 Y859	ANXA2 Y238	79
FAM59A Y453	ERBB2IP Y1104	55		ANXA2 Y24	ANXA2 Y238	52		ITGB4 Y1207	SKT Y393	112		SHC1 Y427	GPRC5A Y347	99		ERBB2 Y1248	STAT3 Y705	52		DSC3 Y818	GSK3B Y216	79
EPHB1 Y600	PTRF Y308	55		SKT Y393	EPHA2 Y588 Y594	52		ACP1 Y132	MPZL1 Y263	112		ENO1 Y44	MAPK3 Y204	99		ERBB2 Y1248	MPZL1 Y263	52		INSR Y1185	BCAR1 Y249	79
EPHA2 Y575	DYRK1A Y321	55		EPHA2 Y588 Y594	MAPK3 Y204	52		MPZL1 Y263	ANXA2 Y238	112		PTRF Y308	FYN Y420	99		TFRC Y20	BCAR1 Y234	52		MAPK3 Y204	PTK2 Y397	79
DYRK1A Y321	PTK2 Y576	55		GRLF1 Y1105	ANXA2 Y238	52		BCAR1 Y327	SGK223 Y413	111		PXN S84 Y88	ACP1 Y132	98		CRKL Y132	EPHA2 Y588	52		LDLR Y845	EGFR Y1092	79
STAT3 Y704	MAPK1 T185 Y187	54		FYN Y420	ALB Y164	52		ANXA2 Y24	ANXA2 Y238	111		CRKL Y132	PRPF4B Y849	98		SHC1 Y349 Y350	EFNB2 Y304	52		INSR Y1189	EFNB2 Y304	78
PXN Y118	MAPK1 T185 Y187	54		ACP1 Y132	MPZL1 Y263	52		ANXA2 Y30	BCAR1 Y249	111		RIN1 Y36	SHC1 Y349	98		EFNB2 Y304	ERBB2IP Y1104	52		PXN S84 Y88	PTK2 Y576	78
PXN S84 Y88	ERBB2 Y1248	54		PXN S84 Y88	TFRC Y20	51		SHC1 Y349	MPZL1 Y263	111		SHC1 Y427	GSK3B Y216	98		EPHA2 Y575	SKT Y393	52		ERBB2 Y1248	BCAR3 Y266	78
PRPF4B Y849	PTK2 Y397	54		PXN S84 Y88	SHC1 Y349 Y350	51		LDLR Y845	PTK2 Y576	111		ANXA2 Y30	GSK3B Y216	98		MAPK1 Y187	GRLF1 Y1105	52		SHC1 Y349 Y350	LDLR Y845	78
PIK3R2 Y464	MAPK14 Y182	54		ERBB2 Y1248	EGFR Y1197	51		STAT3 Y704	MAPK14 Y182	110		PRPF4B Y849	PKP3 Y176	98		BCAR3 Y266	DYRK1A Y321	52		SH2D3A Y231 S218	PTK2 Y397	78
MAPK1 T185 Y187	STAT3 Y705	54		PIK3R2 Y464	CTNND1 Y228	51		PIK3R2 Y464	MAPK1 T185 Y187	110		GRLF1 Y1105	ACP1 Y132	98		MAPK1 T185 Y187	EPHA2 Y588 Y594	52		BCAR1 Y234	LDLR Y845	78
MAPK1 T185 Y187	DYRK1A Y321	54		PIK3R2 Y464	PKP3 Y176	51		CRKL Y132	EGFR Y1197	110		DYRK1A Y321	FYN Y420	98		INPPL1 Y986	MAPK14 Y182	52		CTNND1 Y228	MAPK14 Y182	78
GSK3B Y216	PTK2 Y397	54		TFRC Y20	MAPK14 Y182	51		EGFR Y1197	PTK2 Y397	110		ATA2 Y20	BCAR1 Y387	97		INSR Y1185	MAPK3 Y204	52		MAPK1 T185 Y187	DSC3 Y818	78
GIT1 Y545	SHB Y268	54		TFRC Y20	ACP1 Y132	51		PTPRA Y798	MAPK3 Y204	110		INSR Y1189	PRPF4B Y849	97		MAPK14 Y182	EGFR Y1092	52		ANXA2 Y30	EGFR Y1092	78
FAM59A Y453	LDLR Y845	54		EPHA2 Y772	LDLR Y845	51		PXN Y118	EGFR Y1172	110		CDK2 Y15	AFAP1L2 Y413	97		LDLR Y845	BCAR1 Y249	52		SKT Y393	MAPK14 Y182	78
EPHB1 Y600	FYN Y420	54		SGK223 Y413	PTK2 Y576	51		PXN Y118	SHC1 Y427	110		CDK2 Y15	EPHA2 Y588	97		PTK2 Y397	ERBB2IP Y1104	52		GRLF1 Y1105	EPHA2 Y588	78
CRKL Y132	PTPRA Y798	54		EPHA2 Y588 Y594	ERBB2IP Y1104	51		MAPK1 Y187	PTK2 Y576	110		SH2D3A Y231 S218	AFAP1L2 Y413	97		ATA2 Y20	ERBB2IP Y1104	51		TFRC Y20	ITGB4 Y1207	77
AFAP1L2 Y413	PTK2 Y397	54		ATA2 Y20	ANXA2 Y238	50		EGFR Y1172	MPZL1 Y263	110		SGK223 Y413	GRLF1 Y1105	97		BCAR1 Y327	EPHA2 Y588	51		SHC1 Y349 Y350	CDK2 Y15	77
SGK223 Y413	PTK2 Y397	53		INSR Y1189	PTRF Y308	50		MAPK1 T185 Y187	DSC3 Y818	110		PRPF4B Y849	GPRC5A Y347	97		PIK3R2 Y464	PTPRA Y798	51		EFNB2 Y304	PTPRA Y798	77
PXN Y118	PTRF Y308	53		PXN S84 Y88	EGFR Y1092	50		ITGB4 Y1207	PTRF Y308	110		ATA2 Y20	SH2D3A Y231 S218	96		TFRC Y20	EPHA2 Y772	51		EFNB2 Y304	PTPN11 Y62	77
ITGB4 Y1207	EPHA2 Y588	53		ERBB2 Y1248	SHC1 Y427	50		LDLR Y845	ERBB2IP Y1104	110		PXN S84 Y88	PKP3 Y176	96		CRKL Y132	MAPK1 T185 Y187	51		SH2D3A Y231 S218	SHC1 Y427	77
GSK3B Y216	MPZL1 Y263	53		ERBB2 Y1248	PTPN11 Y62	50		BCAR1 Y327	EFNB2 Y304	109		TFRC Y20	EPHA2 Y588	96		SHC1 Y349 Y350	PTPRA Y798	51		EGFR Y1197	PRPF4B Y849	77
GIT1 Y545	EPHB1 Y600	53		PIK3R2 Y464	SKT Y393	50		CDK2 Y15	MAPK14 Y182	109		EFNB2 Y304	GRLF1 Y1105	96		GIT1 Y545	ANXA2 Y238	51		FAM59A Y453	INSR Y1185	77
ENO1 Y44	MAPK14 Y182	53		CDK2 Y15	EPHB1 Y600	50		ANXA2 Y24	GRLF1 Y1105	109		BCAR1 Y234	CAV1 Y14	96		ANXA2 Y24	ERBB2IP Y1104	51		AFAP1L2 Y413	MAPK1 T185 Y187	77
EFNB2 Y304	ANXA2 Y30	53		CTNND1 Y228	EPHA2 Y588 Y594	50		SHC1 Y427	MPZL1 Y263	109		FAM59A Y453	PKP3 Y176	96		SHC1 Y427	ERBB2IP Y1104	51		TNK2 Y859	LDLR Y845	77
EFNB2 Y304	MPZL1 Y263	53		CTNND1 Y228	ANXA2 Y238	50		INPPL1 Y986	CAV1 Y14	109		CTNND1 Y228	LDLR Y845	96		ITGB4 Y1207	PTPN11 Y62	51		DSC3 Y818	ACP1 Y132	77
ANXA2 Y24	ERBB2IP Y1104	53		PTPRA Y798	GSK3B Y216	50		ITGB4 Y1207	EPHB1 Y600	109		PTPRA Y798	INSR Y1185	96		MAPK14 Y182	STAT3 Y705	51		BCAR1 Y327	PXN Y118	76
SH2D3A Y231 S218	CTNND1 Y228	52		MAPK1 Y187	INSR Y1185	50		CAV1 Y14	EGFR Y1092	109		ATA2 Y20	AFAP1L2 Y413	95		SHC1 Y349	ACP1 Y132	51		TFRC Y20	PTPN11 Y62	76
SGK223 Y413	GPRC5A Y347	52		MAPK1 Y187	ALB Y164	50		LDLR Y845	ANXA2 Y238	109		PXN S84 Y88	AFAP1L2 Y413	95		PKP3 Y176	ACP1 Y132	51		SHC1 Y349 Y350	ANXA2 Y238	76
PXN S84 Y88	MAPK1 Y187	52		ANXA2 Y30	ANXA2 Y238	50		SHC1 Y349	GPRC5A Y347	108		PXN S84 Y88	PTPN11 Y62	95		ATA2 Y20	PRPF4B Y849	50		FAM59A Y453	EPHA2 Y588 Y594	76
PXN S84 Y88	MAPK3 Y204	52		TNK2 Y859	DYRK1A Y321	50		ATA2 Y20	ITGB4 Y1207	107		ERBB2 Y1248	TFRC Y20	95		INSR Y1189	SGK223 Y413	50		PXN Y118	BCAR1 Y387	76
MAPK1 Y187	ENO1 Y44	52		SKT Y393	PTRF Y308	50		INSR Y1189	SHC1 Y349	107		ERBB2 Y1248	PTPN11 Y62	95		PXN S84 Y88	ENO1 Y44	50		INPPL1 Y986	LDLR Y845	76
ITGB4 Y1207	ANXA2 Y238	52		SGK223 Y413	PRPF4B Y849	50		SHC1 Y349 Y350	MAPK14 Y182	107		BCAR1 Y327	PTK2 Y576	95		STAT3 Y704	MAPK14 Y182	50		PXN S84 Y88	FYN Y420	75
INSR Y1189	CRKL Y132	52		MAPK14 Y182	SHB Y268	50		EGFR Y1197	PXN Y118	107		CDK2 Y15	CTNND1 Y228	95		BCAR1 Y327	EPHB1 Y600	50		PIK3R2 Y464	EGFR Y1197	75
GRLF1 Y1105	LDLR Y845	52		ACP1 Y132	SHB Y268	50		ANXA2 Y24	ANXA2 Y30	107		CDK2 Y15	SHC1 Y427	95		PIK3R2 Y464	RIN1 Y36	50		CRKL Y132	PTPN11 Y62	75
ERBB2 Y1248	PIK3R2 Y464	52		PXN S84 Y88	INPPL1 Y986	49		PIK3R2 Y464	TNK2 Y859	106		FAM59A Y453	SHC1 Y427	95		GIT1 Y545	MAPK1 T185 Y187	50		GIT1 Y545	PRPF4B Y849	75
ERBB2 Y1248	ANXA2 Y24	52		CRKL Y132	MPZL1 Y263	49		SHC1 Y349 Y350	AFAP1L2 Y413	106		FAM59A Y453	GPRC5A Y347	95		AFAP1L2 Y413	MAPK3 Y204	50		FAM59A Y453	TNK2 Y859	75
ERBB2 Y1248	TNK2 Y859	52		AFAP1L2 Y413	EPHB1 Y600	49		CDK2 Y15	ANXA2 Y24	106		CTNND1 Y228	SGK223 Y413	95		ANXA2 Y24	GSK3B Y216	50		EGFR Y1172	PKP3 Y176	75
ENO1 Y44	MAPK3 Y204	52		EPHA2 Y772	ALB Y164	49		EGFR Y1197	MAPK1 T185 Y187	106		PXN Y118	ENO1 Y44	95		BCAR3 Y266	PTPN11 Y62	50		EGFR Y1172	ACP1 Y132	75
EFNB2 Y304	GIT1 Y545	52		SKT Y393	ANXA2 Y238	49		RIN1 Y36	MAPK1 T185 Y187	106		ATA2 Y20	PKP3 Y176	94		INPPL1 Y986	GPRC5A Y347	50		BCAR1 Y387	EPHB1 Y600	75
DYRK1A Y321	MPZL1 Y263	52		PRPF4B Y849	MPZL1 Y263	49		RIN1 Y36	INSR Y1185	106		PXN S84 Y88	DSC3 Y818	94		SGK223 Y413	INSR Y1185	50		PIK3R2 Y464	TFRC Y20	74
CRKL Y132	EPHA2 Y588	52		GSK3B Y216	GPRC5A Y347	49		RIN1 Y36	MPZL1 Y263	106		PXN S84 Y88	LDLR Y845	94		GPRC5A Y347	EGFR Y1092	50		CRKL Y132	PTPRA Y798	74
ATA2 Y20	ERBB2 Y1248	52		PKP3 Y176	ANXA2 Y238	49		EGFR Y1172	GPRC5A Y347	106		ERBB2 Y1248	DSC3 Y818	94		INSR Y1189	ACP1 Y132	49		EFNB2 Y304	SH2D3A Y231 S218	74
ATA2 Y20	TFRC Y20	52		INSR Y1189	ALB Y164	48		ANXA2 Y30	EPHA2 Y772	106		PIK3R2 Y464	EGFR Y1197	94		STAT3 Y704	SH2D3A Y231 S218	49		BCAR1 Y234	PXN Y118	74
ACP1 Y132	PTK2 Y397	52		ERBB2 Y1248	FAM59A Y453	48		EPHA2 Y588	ANXA2 Y238	106		EGFR Y1197	ACP1 Y132	94		BCAR1 Y327	PTPN11 Y62	49		PXN Y118	SHC1 Y427	74
PKP3 Y176	ACP1 Y132	51		ERBB2 Y1248	MAPK1 T185 Y187	48		INSR Y1189	PTPRA Y798	105		ANXA2 Y24	DSC3 Y818	94		PIK3R2 Y464	AFAP1L2 Y413	49		BCAR3 Y266	INSR Y1185	74
PIK3R2 Y464	ERBB2IP Y1104	51		ERBB2 Y1248	DSC3 Y818	48		INSR Y1189	EGFR Y1172	105		ANXA2 Y24	MAPK3 Y204	94		TFRC Y20	MAPK14 Y182	49		DSC3 Y818	PRPF4B Y849	74
MAPK14 Y182	PTRF Y308	51		ERBB2 Y1248	EGFR Y1092	48		ERBB2 Y1248	STAT3 Y705	105		SKT Y393	CAV1 Y14	94		CRKL Y132	LDLR Y845	49		EPHA2 Y588 Y594	SHC1 Y349	74
MAPK1 T185 Y187	LDLR Y845	51		TFRC Y20	ENO1 Y44	48		BCAR1 Y234	SHB Y268	105		MAPK14 Y182	PTPN11 Y62	94		SHC1 Y349 Y350	RIN1 Y36	49		INSR Y1185	GPRC5A Y347	74
GIT1 Y545	BCAR3 Y266	51		GIT1 Y545	MAPK1 Y187	48		SHC1 Y427	MAPK14 Y182	105		ATA2 Y20	INSR Y1185	93		CDK2 Y15	PTRF Y308	49		SHC1 Y349	GPRC5A Y347	74
GIT1 Y545	BCAR1 Y249	51		GIT1 Y545	EPHB1 Y600	48		SHC1 Y427	GPRC5A Y347	105		INSR Y1189	FYN Y420	93		CDK2 Y15	ACP1 Y132	49		DYRK1A Y321	PTK2 Y576	74
CTNND1 Y228	ANXA2 Y238	51		CTNND1 Y228	PTRF Y308	48		SGK223 Y413	PTK2 Y397	105		PXN S84 Y88	TFRC Y20	93		EPHA2 Y575	EPHA2 Y772	49		ATA2 Y20	PTPN11 Y62	73
CRKL Y132	INSR Y1185	51		AFAP1L2 Y413	MAPK1 Y187	48		ANXA2 Y238	PTK2 Y576	105		ERBB2 Y1248	ACP1 Y132	93		CTNND1 Y228	ANXA2 Y24	49		INSR Y1189	BCAR1 Y234	73
TFRC Y20	CAV1 Y14	50		MAPK1 T185 Y187	EPHA2 Y588	48		INSR Y1189	SHC1 Y427	104		BCAR1 Y327	FAM59A Y453	93		EGFR Y1172	GSK3B Y216	49		STAT3 Y704	ITGB4 Y1207	73
SKT Y393	PTK2 Y397	50		ENO1 Y44	MPZL1 Y263	48		ERBB2 Y1248	SHC1 Y349 Y350	104		BCAR1 Y327	SHC1 Y349	93		ENO1 Y44	FYN Y420	49		CRKL Y132	ANXA2 Y30	73
SHC1 Y349	ERBB2IP Y1104	50		INSR Y1185	MAPK3 Y204	48		CTNND1 Y228	AFAP1L2 Y413	104		CRKL Y132	RIN1 Y36	93		SGK223 Y413	STAT3 Y705	49		SH2D3A Y231 S218	BCAR1 Y234	73
PXN S84 Y88	GIT1 Y545	50		INSR Y1185	GPRC5A Y347	48		PXN Y118	STAT3 Y705	104		SHC1 Y349 Y350	INSR Y1185	93		INSR Y1185	ACP1 Y132	49		EGFR Y1197	DSC3 Y818	73
PIK3R2 Y464	TFRC Y20	50		EPHB1 Y600	ERBB2IP Y1104	48		RIN1 Y36	ANXA2 Y24	104		CDK2 Y15	BCAR1 Y387	93		PTRF Y308	PTK2 Y576	49		FAM59A Y453	ACP1 Y132	73
INSR Y1189	CDK2 Y15	50		PXN S84 Y88	TNK2 Y859	47		PRPF4B Y849	SHB Y268	104		EGFR Y1197	LDLR Y845	93		ALB Y164	PTPN11 Y62	49		BCAR3 Y266	PTK2 Y576	73
FAM59A Y453	SKT Y393	50		PXN S84 Y88	SKT Y393	47		INSR Y1185	SHC1 Y349	104		CTNND1 Y228	ENO1 Y44	93		ATA2 Y20	ACP1 Y132	48		ITGB4 Y1207	STAT3 Y705	73
ERBB2 Y1248	GRLF1 Y1105	50		ERBB2 Y1248	INPPL1 Y986	47		MAPK14 Y182	SHC1 Y349	104		CTNND1 Y228	PTRF Y308	93		PXN S84 Y88	SH2D3A Y231 S218	48		SHB Y268	PTK2 Y576	73
DSC3 Y818	MAPK14 Y182	50		PIK3R2 Y464	SHC1 Y427	47		MAPK3 Y204	PKP3 Y176	104		AFAP1L2 Y413	INSR Y1185	93		PXN S84 Y88	PTRF Y308	48		INSR Y1189	SHC1 Y427	72
CTNND1 Y228	MAPK14 Y182	50		PIK3R2 Y464	DSC3 Y818	47		BCAR1 Y327	BCAR1 Y387	103		INPPL1 Y986	SGK223 Y413	93		PXN S84 Y88	MPZL1 Y263	48		CRKL Y132	CAV1 Y14	72
CRKL Y132	GSK3B Y216	50		SHC1 Y349 Y350	MPZL1 Y263	47		TFRC Y20	ITGB4 Y1207	103		ENO1 Y44	MAPK14 Y182	93		STAT3 Y704	SGK223 Y413	48		EFNB2 Y304	CAV1 Y14	72
CDK2 Y15	INSR Y1185	50		EFNB2 Y304	EPHA2 Y588	47		BCAR1 Y234	LDLR Y845	103		CAV1 Y14	GPRC5A Y347	93		STAT3 Y704	MAPK3 Y204	48		GIT1 Y545	MAPK1 T185 Y187	72
SH2D3A Y231 S218	INSR Y1185	49		CDK2 Y15	INSR Y1185	47		TNK2 Y859	DSC3 Y818	103		BCAR1 Y387	PTK2 Y576	93		ERBB2 Y1248	AFAP1L2 Y413	48		CTNND1 Y228	AFAP1L2 Y413	72
SH2D3A Y231 S218	EPHA2 Y588	49		CDK2 Y15	ANXA2 Y238	47		BCAR1 Y327	ITGB4 Y1207	102		ERBB2 Y1248	LDLR Y845	92		PIK3R2 Y464	EGFR Y1197	48		CTNND1 Y228	GSK3B Y216	72
MAPK14 Y182	PTK2 Y397	49		GIT1 Y545	ACP1 Y132	47		BCAR1 Y327	GRLF1 Y1105	102		TFRC Y20	FAM59A Y453	92		PIK3R2 Y464	GSK3B Y216	48		INPPL1 Y986	SHC1 Y349	72
INSR Y1189	SH2D3A Y231 S218	49		FAM59A Y453	MAPK14 Y182	47		PIK3R2 Y464	SHC1 Y349 Y350	102		TFRC Y20	PTPRA Y798	92		EFNB2 Y304	SHC1 Y349	48		EPHA2 Y588	PTK2 Y576	72
GIT1 Y545	BCAR1 Y234	49		PXN Y118	MAPK1 Y187	47		CRKL Y132	MAPK1 Y187	102		TFRC Y20	EGFR Y1172	92		CDK2 Y15	BCAR3 Y266	48		ERBB2 Y1248	PTPRA Y798	71
ERBB2IP Y1104	ALB Y164	49		AFAP1L2 Y413	ACP1 Y132	47		CDK2 Y15	PTRF Y308	102		CRKL Y132	BCAR1 Y387	92		EPHA2 Y575	BCAR1 Y387	48		PIK3R2 Y464	GRLF1 Y1105	71
ERBB2 Y1248	CAV1 Y14	49		EGFR Y1172	MPZL1 Y263	47		EGFR Y1172	MAPK14 Y182	102		SHC1 Y349 Y350	DSC3 Y818	92		GIT1 Y545	EPHA2 Y588 Y594	48		TFRC Y20	MAPK1 Y187	71
EPHA2 Y588 Y594	DYRK1A Y321	49		INPPL1 Y986	MPZL1 Y263	47		EPHA2 Y772	SHB Y268	102		BCAR1 Y234	PTK2 Y576	92		PXN Y118	MAPK3 Y204	48		SH2D3A Y231 S218	GPRC5A Y347	71
CDK2 Y15	PTK2 Y397	49		ENO1 Y44	SHB Y268	47		GRLF1 Y1105	LDLR Y845	102		EGFR Y1172	BCAR1 Y249	92		RIN1 Y36	GPRC5A Y347	48		GIT1 Y545	PTPRA Y798	71
TFRC Y20	EGFR Y1197	48		DSC3 Y818	EPHA2 Y588 Y594	47		CRKL Y132	MAPK3 Y204	101		ITGB4 Y1207	INSR Y1185	92		ANXA2 Y24	ENO1 Y44	48		CTNND1 Y228	ENO1 Y44	71
SH2D3A Y231 S218	ITGB4 Y1207	48		PRPF4B Y849	EPHB1 Y600	47		SHC1 Y349 Y350	DSC3 Y818	101		MAPK14 Y182	GPRC5A Y347	92		ANXA2 Y30	ANXA2 Y238	48		GRLF1 Y1105	PTK2 Y397	71
SH2D3A Y231 S218	PRPF4B Y849	48		EPHA2 Y588 Y594	STAT3 Y705	47		EGFR Y1197	MPZL1 Y263	101		ATA2 Y20	FYN Y420	91		MAPK3 Y204	STAT3 Y705	48		SHC1 Y349	ACP1 Y132	71
MPZL1 Y263	ALB Y164	48		MAPK14 Y182	GPRC5A Y347	47		EGFR Y1172	INSR Y1185	101		PIK3R2 Y464	CRKL Y132	91		LDLR Y845	SHB Y268	48		STAT3 Y704	PKP3 Y176	70
MAPK1 T185 Y187	PTPN11 Y62	48		MAPK3 Y204	MPZL1 Y263	47		MAPK1 T185 Y187	ENO1 Y44	101		EFNB2 Y304	CTNND1 Y228	91		INSR Y1189	AFAP1L2 Y413	47		PIK3R2 Y464	MAPK1 T185 Y187	70
EFNB2 Y304	GPRC5A Y347	48		ATA2 Y20	LDLR Y845	46		ANXA2 Y30	PTRF Y308	101		CDK2 Y15	GRLF1 Y1105	91		PXN S84 Y88	SGK223 Y413	47		TFRC Y20	EGFR Y1092	70
SHC1 Y427	ACP1 Y132	47		INSR Y1189	MAPK1 Y187	46		SHC1 Y349 Y350	ENO1 Y44	100		GIT1 Y545	BCAR1 Y249	91		BCAR1 Y327	EFNB2 Y304	47		SHC1 Y349 Y350	ENO1 Y44	70
SH2D3A Y231 S218	GSK3B Y216	47		PXN S84 Y88	PIK3R2 Y464	46		EPHA2 Y575	ANXA2 Y30	100		FAM59A Y453	MAPK1 Y187	91		BCAR1 Y327	SKT Y393	47		SHC1 Y349 Y350	ERBB2IP Y1104	70
RIN1 Y36	ERBB2IP Y1104	47		PXN S84 Y88	EPHA2 Y588	46		RIN1 Y36	PTRF Y308	100		CTNND1 Y228	GPRC5A Y347	91		BCAR1 Y327	ALB Y164	47		SHC1 Y349 Y350	EGFR Y1092	70
PXN Y118	EPHA2 Y772	47		FAM59A Y453	ACP1 Y132	46		SHC1 Y427	INSR Y1185	100		PTPRA Y798	PTRF Y308	91		BCAR1 Y327	PTK2 Y576	47		GIT1 Y545	EPHA2 Y588 Y594	70
PXN Y118	BCAR1 Y387	47		PTPRA Y798	MAPK14 Y182	46		ITGB4 Y1207	ERBB2IP Y1104	100		INPPL1 Y986	PRPF4B Y849	91		TFRC Y20	GIT1 Y545	47		BCAR1 Y234	EPHB1 Y600	70
PTPRA Y798	MAPK14 Y182	47		PTPRA Y798	EPHB1 Y600	46		GPRC5A Y347	PTPN11 Y62	100		EPHA2 Y588	ALB Y164	91		CRKL Y132	CTNND1 Y228	47		FAM59A Y453	MAPK3 Y204	70
MAPK1 T185 Y187	EPHA2 Y588 Y594	47		MAPK1 Y187	PTPN11 Y62	46		PXN S84 Y88	EPHA2 Y588	99		FYN Y420	PTK2 Y576	91		EFNB2 Y304	EPHA2 Y575	47		CTNND1 Y228	EGFR Y1172	70
ITGB4 Y1207	EPHA2 Y588 Y594	47		MAPK1 T185 Y187	EPHA2 Y588 Y594	46		GIT1 Y545	SHB Y268	99		INSR Y1189	GPRC5A Y347	90		CDK2 Y15	EPHA2 Y588	47		AFAP1L2 Y413	EPHB1 Y600	70
GRLF1 Y1105	ANXA2 Y238	47		ANXA2 Y30	LDLR Y845	46		GRLF1 Y1105	FYN Y420	99		EPHA2 Y575	EPHA2 Y772	90		SH2D3A Y231 S218	AFAP1L2 Y413	47		INPPL1 Y986	ANXA2 Y238	70
GIT1 Y545	MAPK1 Y187	47		EPHA2 Y772	INSR Y1185	46		MAPK14 Y182	STAT3 Y705	99		EGFR Y1197	GSK3B Y216	90		CTNND1 Y228	EPHB1 Y600	47		DSC3 Y818	FYN Y420	70
GIT1 Y545	MAPK3 Y204	47		TNK2 Y859	MPZL1 Y263	46		MAPK3 Y204	MPZL1 Y263	99		EGFR Y1197	PTPN11 Y62	90		PTPRA Y798	MAPK1 Y187	47		EPHA2 Y588	ALB Y164	70
ERBB2 Y1248	RIN1 Y36	47		CAV1 Y14	DYRK1A Y321	46		EPHA2 Y588	ACP1 Y132	99		ANXA2 Y24	SHC1 Y427	90		AFAP1L2 Y413	INSR Y1185	47		BCAR1 Y249	ANXA2 Y238	70
ERBB2 Y1248	PKP3 Y176	47		CAV1 Y14	MPZL1 Y263	46		INSR Y1189	MAPK1 Y187	98		ENO1 Y44	INSR Y1185	90		BCAR3 Y266	EPHB1 Y600	47		INSR Y1189	BCAR1 Y327	69
EPHB1 Y600	GPRC5A Y347	47		PRPF4B Y849	ALB Y164	46		ERBB2 Y1248	SGK223 Y413	98		GRLF1 Y1105	PTRF Y308	90		BCAR3 Y266	ALB Y164	47		PXN S84 Y88	EPHB1 Y600	69
EPHA2 Y575	ITGB4 Y1207	47		MAPK14 Y182	SHC1 Y349	46		EGFR Y1197	GPRC5A Y347	98		GRLF1 Y1105	LDLR Y845	90		CAV1 Y14	GPRC5A Y347	47		TFRC Y20	EGFR Y1172	69
EFNB2 Y304	PTPRA Y798	47		LDLR Y845	PKP3 Y176	46		FAM59A Y453	GRLF1 Y1105	98		PTRF Y308	EPHA2 Y588	90		SGK223 Y413	PTPN11 Y62	47		TFRC Y20	EPHB1 Y600	69
EFNB2 Y304	PKP3 Y176	47		MPZL1 Y263	EGFR Y1092	46		PTPRA Y798	EPHA2 Y588	98		ATA2 Y20	STAT3 Y704	89		BCAR1 Y387	EPHA2 Y588 Y594	47		SHC1 Y349 Y350	PTRF Y308	69
CTNND1 Y228	EPHA2 Y772	47		PXN S84 Y88	CAV1 Y14	45		BCAR3 Y266	ENO1 Y44	98		ATA2 Y20	SHB Y268	89		INSR Y1189	PXN Y118	46		GIT1 Y545	EPHA2 Y772	69
CRKL Y132	AFAP1L2 Y413	47		ERBB2 Y1248	CAV1 Y14	45		PIK3R2 Y464	CTNND1 Y228	97		ERBB2 Y1248	EGFR Y1092	89		PXN S84 Y88	EPHA2 Y772	46		BCAR1 Y234	DYRK1A Y321	69
CRKL Y132	LDLR Y845	47		CRKL Y132	PTK2 Y397	45		TFRC Y20	EPHA2 Y588	97		EGFR Y1172	ACP1 Y132	89		ERBB2 Y1248	ERBB2IP Y1104	46		FAM59A Y453	DSC3 Y818	69
TFRC Y20	SHC1 Y427	46		CRKL Y132	ALB Y164	45		SHC1 Y349 Y350	ANXA2 Y238	97		MAPK1 T185 Y187	GPRC5A Y347	89		PIK3R2 Y464	GIT1 Y545	46		CTNND1 Y228	SHC1 Y349	69
TFRC Y20	TNK2 Y859	46		EPHA2 Y575	INSR Y1185	45		CTNND1 Y228	DSC3 Y818	97		ANXA2 Y30	STAT3 Y705	89		TFRC Y20	CDK2 Y15	46		PXN Y118	BCAR1 Y249	69
SKT Y393	SHC1 Y349	46		RIN1 Y36	EPHA2 Y588	45		PTPRA Y798	MPZL1 Y263	97		ENO1 Y44	GRLF1 Y1105	89		TFRC Y20	CTNND1 Y228	46		SHC1 Y427	EGFR Y1092	69
PXN Y118	BCAR3 Y266	46		SHC1 Y427	ANXA2 Y238	45		ANXA2 Y24	ITGB4 Y1207	97		DSC3 Y818	PTK2 Y397	89		CRKL Y132	ACP1 Y132	46		ENO1 Y44	PTPN11 Y62	69
PXN Y118	BCAR1 Y249	46		DSC3 Y818	ANXA2 Y238	45		INSR Y1185	MAPK3 Y204	97		PTRF Y308	BCAR1 Y249	89		CRKL Y132	MPZL1 Y263	46		STAT3 Y705	PKP3 Y176	69
PXN S84 Y88	DSC3 Y818	46		EPHA2 Y588 Y594	SHC1 Y349	45		STAT3 Y704	PIK3R2 Y464	96		SHC1 Y349 Y350	ITGB4 Y1207	88		SHC1 Y349 Y350	EPHB1 Y600	46		ATA2 Y20	INSR Y1189	68
PTPRA Y798	FYN Y420	46		INSR Y1185	ALB Y164	45		BCAR1 Y327	DYRK1A Y321	96		FAM59A Y453	ENO1 Y44	88		SH2D3A Y231 S218	STAT3 Y705	46		ATA2 Y20	SH2D3A Y231 S218	68
MAPK1 T185 Y187	GPRC5A Y347	46		MAPK14 Y182	STAT3 Y705	45		EGFR Y1197	ANXA2 Y24	96		FAM59A Y453	LDLR Y845	88		EPHA2 Y575	EPHB1 Y600	46		ATA2 Y20	ITGB4 Y1207	68
MAPK1 T185 Y187	SHB Y268	46		MAPK14 Y182	LDLR Y845	45		FAM59A Y453	TNK2 Y859	96		PTPRA Y798	BCAR3 Y266	88		PXN Y118	INSR Y1185	46		INSR Y1189	PTK2 Y397	68
ITGB4 Y1207	ERBB2IP Y1104	46		PXN S84 Y88	PTRF Y308	44		CTNND1 Y228	ANXA2 Y30	96		ANXA2 Y24	SGK223 Y413	88		MAPK1 Y187	GSK3B Y216	46		PXN S84 Y88	PTRF Y308	68
INSR Y1189	GRLF1 Y1105	46		STAT3 Y704	MAPK14 Y182	44		MAPK1 T185 Y187	ANXA2 Y238	96		BCAR3 Y266	EPHA2 Y588	88		SHC1 Y427	ENO1 Y44	46		STAT3 Y704	PTPN11 Y62	68
GIT1 Y545	MAPK14 Y182	46		ERBB2 Y1248	SHC1 Y349 Y350	44		EPHA2 Y588 Y594	EPHA2 Y588	96		EPHA2 Y588 Y594	SHB Y268	88		SGK223 Y413	GRLF1 Y1105	46		BCAR1 Y327	SH2D3A Y231 S218	68
ERBB2 Y1248	ITGB4 Y1207	46		ERBB2 Y1248	SHB Y268	44		GSK3B Y216	SHB Y268	96		GRLF1 Y1105	GPRC5A Y347	88		EPHA2 Y588 Y594	SHB Y268	46		PIK3R2 Y464	AFAP1L2 Y413	68
ENO1 Y44	EPHB1 Y600	46		SHC1 Y349 Y350	DYRK1A Y321	44		STAT3 Y704	FAM59A Y453	95		INSR Y1185	DYRK1A Y321	88		SHC1 Y349	MPZL1 Y263	46		PIK3R2 Y464	DSC3 Y818	68
EFNB2 Y304	ENO1 Y44	46		GIT1 Y545	EPHA2 Y772	44		ANXA2 Y30	PTPN11 Y62	95		INSR Y1185	LDLR Y845	88		PIK3R2 Y464	EGFR Y1172	45		EPHA2 Y575	ALB Y164	68
CRKL Y132	SGK223 Y413	46		FAM59A Y453	ENO1 Y44	44		INPPL1 Y986	PTK2 Y397	95		EPHA2 Y588	LDLR Y845	88		PIK3R2 Y464	SKT Y393	45		GIT1 Y545	PTPN11 Y62	68
ANXA2 Y30	EPHB1 Y600	46		AFAP1L2 Y413	EPHA2 Y772	44		CAV1 Y14	SGK223 Y413	95		INSR Y1189	ENO1 Y44	87		PIK3R2 Y464	CAV1 Y14	45		FAM59A Y453	GSK3B Y216	68
ANXA2 Y24	MAPK1 Y187	46		MAPK1 Y187	EPHB1 Y600	44		PKP3 Y176	ACP1 Y132	95		STAT3 Y704	ANXA2 Y30	87		SHC1 Y349 Y350	TNK2 Y859	45		PXN Y118	SHB Y268	68
ANXA2 Y24	MAPK3 Y204	46		MAPK3 Y204	LDLR Y845	44		PTK2 Y397	EGFR Y1092	95		BCAR1 Y327	SHC1 Y349 Y350	87		FAM59A Y453	GSK3B Y216	45		MAPK1 T185 Y187	GRLF1 Y1105	68
SHC1 Y349 Y350	SKT Y393	45		INSR Y1189	CDK2 Y15	43		INSR Y1189	EGFR Y1197	94		BCAR1 Y327	PTPRA Y798	87		CTNND1 Y228	PTRF Y308	45		INPPL1 Y986	EPHA2 Y772	68
PXN S84 Y88	GSK3B Y216	45		INSR Y1189	MAPK3 Y204	43		CRKL Y132	PTPN11 Y62	94		CRKL Y132	EGFR Y1092	87		PTPRA Y798	ANXA2 Y30	45		EPHA2 Y772	EPHA2 Y588 Y594	68
PKP3 Y176	ANXA2 Y238	45		PXN S84 Y88	PXN Y118	43		PTPRA Y798	BCAR3 Y266	94		EGFR Y1197	GPRC5A Y347	87		ANXA2 Y24	ACP1 Y132	45		INSR Y1185	SHB Y268	68
INSR Y1189	ENO1 Y44	45		PXN S84 Y88	SHC1 Y427	43		TNK2 Y859	MAPK14 Y182	94		TNK2 Y859	MAPK14 Y182	87		ANXA2 Y30	TNK2 Y859	45		MAPK14 Y182	PKP3 Y176	68
GRLF1 Y1105	INSR Y1185	45		PXN S84 Y88	MAPK3 Y204	43		ERBB2 Y1248	MAPK1 T185 Y187	93		TNK2 Y859	ACP1 Y132	87		EPHA2 Y772	FYN Y420	45		SHC1 Y349	GSK3B Y216	68
FAM59A Y453	PTPN11 Y62	45		ERBB2 Y1248	TNK2 Y859	43		SH2D3A Y231 S218	GRLF1 Y1105	93		DSC3 Y818	MAPK14 Y182	87		ENO1 Y44	BCAR1 Y387	45		MAPK3 Y204	SHB Y268	68
ERBB2 Y1248	ANXA2 Y30	45		PIK3R2 Y464	DYRK1A Y321	43		FAM59A Y453	STAT3 Y705	93		ATA2 Y20	STAT3 Y705	86		BCAR1 Y387	ANXA2 Y238	45		STAT3 Y705	PTPN11 Y62	68
EPHA2 Y575	MAPK1 T185 Y187	45		DSC3 Y818	DYRK1A Y321	43		RIN1 Y36	PKP3 Y176	93		INSR Y1189	ERBB2IP Y1104	86		ATA2 Y20	SHC1 Y349	44		DYRK1A Y321	BCAR1 Y249	68
ENO1 Y44	INSR Y1185	45		SKT Y393	PTPN11 Y62	43		ANXA2 Y24	SHC1 Y349	93		PXN S84 Y88	SHB Y268	86		INSR Y1189	ITGB4 Y1207	44		LDLR Y845	BCAR1 Y249	68
BCAR1 Y327	PXN Y118	45		MAPK14 Y182	MPZL1 Y263	43		MAPK3 Y204	GPRC5A Y347	93		BCAR1 Y327	EPHA2 Y588	86		CRKL Y132	SHC1 Y349 Y350	44		INSR Y1189	GPRC5A Y347	67
ANXA2 Y24	SKT Y393	45		EPHB1 Y600	PTRF Y308	43		EPHA2 Y588	PTPN11 Y62	93		SHC1 Y349 Y350	GSK3B Y216	86		CRKL Y132	SHC1 Y349	44		ERBB2 Y1248	BCAR1 Y327	67
PXN S84 Y88	PTPRA Y798	44		STAT3 Y705	ACP1 Y132	43		STAT3 Y704	DSC3 Y818	92		CDK2 Y15	RIN1 Y36	86		EGFR Y1197	GSK3B Y216	44		FAM59A Y453	GPRC5A Y347	67
PXN S84 Y88	AFAP1L2 Y413	44		INSR Y1189	EPHA2 Y772	42		BCAR1 Y327	ANXA2 Y238	92		FAM59A Y453	PTPN11 Y62	86		MAPK1 Y187	LDLR Y845	44		CTNND1 Y228	EPHA2 Y588 Y594	67
MAPK1 T185 Y187	EPHA2 Y588	44		INSR Y1189	GPRC5A Y347	42		EGFR Y1197	INSR Y1185	92		TNK2 Y859	LDLR Y845	86		ITGB4 Y1207	INSR Y1185	44		ANXA2 Y30	SGK223 Y413	67
MAPK1 T185 Y187	ALB Y164	44		ERBB2 Y1248	EFNB2 Y304	42		AFAP1L2 Y413	TNK2 Y859	92		INSR Y1189	INPPL1 Y986	85		GSK3B Y216	GPRC5A Y347	44		ANXA2 Y30	MPZL1 Y263	67
ITGB4 Y1207	PTK2 Y576	44		EFNB2 Y304	MAPK3 Y204	42		AFAP1L2 Y413	GRLF1 Y1105	92		BCAR1 Y327	RIN1 Y36	85		PKP3 Y176	SHB Y268	44		TNK2 Y859	PTRF Y308	67
GSK3B Y216	ACP1 Y132	44		ENO1 Y44	STAT3 Y705	42		ANXA2 Y24	EGFR Y1172	92		ANXA2 Y24	MAPK1 Y187	85		PXN S84 Y88	BCAR1 Y234	43		INSR Y1185	MAPK14 Y182	67
ERBB2 Y1248	FAM59A Y453	44		EPHA2 Y588 Y594	PTK2 Y397	42		SHC1 Y349	PTRF Y308	92		EGFR Y1172	LDLR Y845	85		ERBB2 Y1248	GSK3B Y216	43		ATA2 Y20	PTPRA Y798	66
ERBB2 Y1248	DSC3 Y818	44		INSR Y1189	EPHA2 Y575	41		CTNND1 Y228	ENO1 Y44	91		ANXA2 Y30	ERBB2IP Y1104	85		BCAR1 Y327	DYRK1A Y321	43		INSR Y1189	SHB Y268	66
EPHA2 Y588	ALB Y164	44		PXN S84 Y88	SHB Y268	41		ANXA2 Y24	SHC1 Y427	91		TNK2 Y859	DSC3 Y818	85		PIK3R2 Y464	INPPL1 Y986	43		CRKL Y132	EGFR Y1197	66
EFNB2 Y304	GSK3B Y216	44		STAT3 Y704	ACP1 Y132	41		MAPK1 Y187	GPRC5A Y347	91		TNK2 Y859	MAPK3 Y204	85		PIK3R2 Y464	TNK2 Y859	43		SH2D3A Y231 S218	SHB Y268	66
CRKL Y132	PRPF4B Y849	44		PIK3R2 Y464	EGFR Y1172	41		PXN S84 Y88	GRLF1 Y1105	90		EPHA2 Y588	ACP1 Y132	85		PIK3R2 Y464	EGFR Y1092	43		PTPRA Y798	EGFR Y1092	66
AFAP1L2 Y413	GPRC5A Y347	44		PIK3R2 Y464	EGFR Y1092	41		CRKL Y132	INPPL1 Y986	90		INSR Y1189	PXN Y118	84		EFNB2 Y304	BCAR3 Y266	43		AFAP1L2 Y413	FYN Y420	66
INSR Y1189	PTRF Y308	43		CRKL Y132	MAPK3 Y204	41		CRKL Y132	EGFR Y1092	90		INSR Y1189	PTPN11 Y62	84		SH2D3A Y231 S218	GSK3B Y216	43		MAPK1 Y187	ERBB2IP Y1104	66
INSR Y1185	PTRF Y308	43		CDK2 Y15	PXN Y118	41		MAPK1 Y187	MAPK14 Y182	90		SHC1 Y349 Y350	ACP1 Y132	84		GIT1 Y545	MAPK14 Y182	43		ALB Y164	PTK2 Y576	66
GPRC5A Y347	PTK2 Y576	43		GIT1 Y545	PRPF4B Y849	41		MAPK1 Y187	PKP3 Y176	90		GIT1 Y545	SGK223 Y413	84		BCAR1 Y234	FYN Y420	43		INSR Y1189	BCAR1 Y387	65
FAM59A Y453	ANXA2 Y238	43		CTNND1 Y228	PTPN11 Y62	41		EGFR Y1172	PTRF Y308	90		RIN1 Y36	BCAR1 Y387	84		FAM59A Y453	DSC3 Y818	43		BCAR1 Y327	MAPK3 Y204	65
EPHB1 Y600	MPZL1 Y263	43		PXN Y118	DYRK1A Y321	41		SKT Y393	GRLF1 Y1105	90		ANXA2 Y24	ACP1 Y132	84		BCAR3 Y266	SKT Y393	43		CRKL Y132	MAPK3 Y204	65
CRKL Y132	EPHA2 Y772	43		AFAP1L2 Y413	PRPF4B Y849	41		EGFR Y1197	PTRF Y308	89		TNK2 Y859	PTPN11 Y62	84		EPHB1 Y600	SHC1 Y349	43		SHC1 Y349 Y350	GPRC5A Y347	65
CRKL Y132	PTPN11 Y62	43		SHC1 Y427	LDLR Y845	41		FAM59A Y453	ITGB4 Y1207	89		CAV1 Y14	EPHA2 Y588	84		GSK3B Y216	PTPN11 Y62	43		SH2D3A Y231 S218	BCAR1 Y387	65
BCAR1 Y327	PTPRA Y798	43		GRLF1 Y1105	PTPN11 Y62	41		CTNND1 Y228	MAPK3 Y204	89		INSR Y1185	GSK3B Y216	84		PXN S84 Y88	ANXA2 Y30	42		AFAP1L2 Y413	SHC1 Y349	65
AFAP1L2 Y413	PTRF Y308	43		PTRF Y308	STAT3 Y705	41		SHC1 Y427	PTRF Y308	89		EPHA2 Y588	EGFR Y1092	84		STAT3 Y704	ENO1 Y44	42		GSK3B Y216	EGFR Y1092	65
TFRC Y20	SH2D3A Y231 S218	42		INSR Y1189	AFAP1L2 Y413	40		INPPL1 Y986	PTK2 Y576	89		INSR Y1189	TFRC Y20	83		BCAR1 Y327	PRPF4B Y849	42		ERBB2 Y1248	SHB Y268	64
SGK223 Y413	PTRF Y308	42		INSR Y1189	ERBB2IP Y1104	40		BCAR1 Y387	BCAR1 Y249	89		INSR Y1189	EPHA2 Y588	83		TFRC Y20	SHC1 Y349	42		TFRC Y20	INPPL1 Y986	64
PXN S84 Y88	SGK223 Y413	42		PXN S84 Y88	STAT3 Y704	40		ACP1 Y132	SHB Y268	89		BCAR1 Y327	MAPK1 T185 Y187	83		CRKL Y132	GRLF1 Y1105	42		EGFR Y1197	EPHA2 Y588 Y594	64
GSK3B Y216	FYN Y420	42		STAT3 Y704	ENO1 Y44	40		EGFR Y1092	PTK2 Y576	89		BCAR1 Y327	MAPK3 Y204	83		PTPRA Y798	MPZL1 Y263	42		PTPRA Y798	PTK2 Y576	64
FAM59A Y453	EPHA2 Y588 Y594	42		ERBB2 Y1248	RIN1 Y36	40		EPHA2 Y575	BCAR1 Y387	88		EGFR Y1197	ENO1 Y44	83		ANXA2 Y24	SHC1 Y349	42		PXN Y118	BCAR3 Y266	64
CTNND1 Y228	EPHA2 Y588 Y594	42		ERBB2 Y1248	PTRF Y308	40		FAM59A Y453	PTPRA Y798	88		EGFR Y1197	ITGB4 Y1207	83		EPHA2 Y772	ENO1 Y44	42		AFAP1L2 Y413	EGFR Y1172	64
CRKL Y132	ANXA2 Y238	42		ERBB2 Y1248	EPHA2 Y588	40		PXN Y118	PTK2 Y576	88		EGFR Y1197	DSC3 Y818	83		ENO1 Y44	MAPK3 Y204	42		SKT Y393	FYN Y420	64
SH2D3A Y231 S218	SGK223 Y413	41		PIK3R2 Y464	SHC1 Y349 Y350	40		ANXA2 Y30	EPHB1 Y600	88		EGFR Y1197	ANXA2 Y238	83		ENO1 Y44	STAT3 Y705	42		PRPF4B Y849	SHC1 Y349	64
PXN S84 Y88	SHC1 Y427	41		PIK3R2 Y464	INPPL1 Y986	40		DYRK1A Y321	FYN Y420	88		FAM59A Y453	MAPK1 T185 Y187	83		ITGB4 Y1207	MPZL1 Y263	42		PXN S84 Y88	SGK223 Y413	63
PTPRA Y798	SKT Y393	41		PIK3R2 Y464	TNK2 Y859	40		ATA2 Y20	STAT3 Y704	87		ANXA2 Y24	ANXA2 Y238	83		PXN S84 Y88	AFAP1L2 Y413	41		PXN S84 Y88	GRLF1 Y1105	63
MPZL1 Y263	ERBB2IP Y1104	41		PIK3R2 Y464	CAV1 Y14	40		FAM59A Y453	LDLR Y845	87		MAPK1 Y187	TNK2 Y859	83		STAT3 Y704	PIK3R2 Y464	41		ERBB2 Y1248	EPHA2 Y588 Y594	63
FAM59A Y453	EPHA2 Y588	41		TFRC Y20	DYRK1A Y321	40		AFAP1L2 Y413	ITGB4 Y1207	87		EGFR Y1172	DSC3 Y818	83		SHC1 Y349 Y350	CAV1 Y14	41		ERBB2 Y1248	DYRK1A Y321	63
DSC3 Y818	ANXA2 Y238	41		PXN Y118	ENO1 Y44	40		MAPK1 Y187	INSR Y1185	87		EGFR Y1172	PTPN11 Y62	83		CDK2 Y15	EPHA2 Y588 Y594	41		BCAR1 Y327	PTK2 Y576	63
ATA2 Y20	MAPK14 Y182	41		PXN Y118	ITGB4 Y1207	40		MAPK1 T185 Y187	MAPK14 Y182	87		MAPK1 T185 Y187	TNK2 Y859	83		GIT1 Y545	LDLR Y845	41		SHC1 Y349 Y350	BCAR3 Y266	63
ANXA2 Y30	ANXA2 Y238	41		PXN Y118	ALB Y164	40		ANXA2 Y30	ERBB2IP Y1104	87		CAV1 Y14	PKP3 Y176	83		AFAP1L2 Y413	DSC3 Y818	41		GIT1 Y545	GPRC5A Y347	63
ALB Y164	PTPN11 Y62	41		EGFR Y1172	ANXA2 Y238	40		ANXA2 Y30	PTK2 Y576	87		SGK223 Y413	BCAR1 Y387	83		ANXA2 Y24	PRPF4B Y849	41		CTNND1 Y228	ALB Y164	63
TFRC Y20	EGFR Y1172	40		MAPK1 T185 Y187	MAPK3 Y204	40		GRLF1 Y1105	EPHB1 Y600	87		PIK3R2 Y464	TNK2 Y859	82		ANXA2 Y24	MAPK14 Y182	41		PXN Y118	GPRC5A Y347	63
SH2D3A Y231 S218	DYRK1A Y321	40		EPHA2 Y772	EPHB1 Y600	40		PIK3R2 Y464	STAT3 Y705	86		EFNB2 Y304	PTPN11 Y62	82		MAPK1 T185 Y187	GRLF1 Y1105	41		DSC3 Y818	EPHA2 Y588 Y594	63
SH2D3A Y231 S218	LDLR Y845	40		EPHA2 Y772	MPZL1 Y263	40		CTNND1 Y228	ANXA2 Y238	86		FAM59A Y453	INSR Y1185	82		GRLF1 Y1105	MAPK3 Y204	41		PRPF4B Y849	EGFR Y1092	63
SH2D3A Y231 S218	ALB Y164	40		INSR Y1189	GIT1 Y545	39		MAPK1 Y187	MPZL1 Y263	86		RIN1 Y36	MAPK14 Y182	82		MAPK14 Y182	LDLR Y845	41		INSR Y1189	EGFR Y1172	62
SGK223 Y413	MAPK14 Y182	40		PXN S84 Y88	FAM59A Y453	39		EGFR Y1172	PKP3 Y176	86		RIN1 Y36	PTRF Y308	82		GSK3B Y216	PKP3 Y176	41		ERBB2 Y1248	BCAR1 Y387	62
PXN Y118	ACP1 Y132	40		PXN S84 Y88	RIN1 Y36	39		ANXA2 Y30	SKT Y393	86		SGK223 Y413	BCAR1 Y249	82		INSR Y1189	CTNND1 Y228	40		ERBB2 Y1248	GPRC5A Y347	62
PXN Y118	MPZL1 Y263	40		PXN S84 Y88	ANXA2 Y238	39		ANXA2 Y30	FYN Y420	86		MAPK14 Y182	ACP1 Y132	82		CRKL Y132	EPHA2 Y588 Y594	40		EFNB2 Y304	MAPK3 Y204	62
MAPK3 Y204	PKP3 Y176	40		STAT3 Y704	EPHA2 Y588 Y594	39		SHC1 Y349	PKP3 Y176	86		FYN Y420	EGFR Y1092	82		EFNB2 Y304	ANXA2 Y30	40		SH2D3A Y231 S218	EGFR Y1172	62
MAPK14 Y182	ACP1 Y132	40		PIK3R2 Y464	SHC1 Y349	39		ATA2 Y20	TNK2 Y859	85		PKP3 Y176	EGFR Y1092	82		EPHA2 Y575	SGK223 Y413	40		EGFR Y1172	ENO1 Y44	62
MAPK14 Y182	PTK2 Y576	40		CRKL Y132	SGK223 Y413	39		PXN S84 Y88	SHB Y268	85		PKP3 Y176	ANXA2 Y238	82		EPHA2 Y575	EPHA2 Y588	40		EPHA2 Y772	PRPF4B Y849	62
MAPK1 Y187	PKP3 Y176	40		CRKL Y132	PTRF Y308	39		CRKL Y132	SGK223 Y413	85		PXN S84 Y88	INSR Y1185	81		EPHA2 Y575	PTPN11 Y62	40		EPHA2 Y772	PTPN11 Y62	62
MAPK1 T185 Y187	PTK2 Y397	40		EFNB2 Y304	EPHA2 Y588 Y594	39		SHC1 Y427	PKP3 Y176	85		BCAR1 Y327	MAPK1 Y187	81		BCAR1 Y234	ANXA2 Y238	40		BCAR1 Y387	MAPK3 Y204	62
GSK3B Y216	PTK2 Y576	40		PXN Y118	MAPK14 Y182	39		MAPK14 Y182	MAPK3 Y204	85		PIK3R2 Y464	EGFR Y1172	81		FAM59A Y453	PRPF4B Y849	40		INSR Y1185	SHC1 Y349	62
GRLF1 Y1105	PTK2 Y576	40		AFAP1L2 Y413	INSR Y1185	39		SH2D3A Y231 S218	ITGB4 Y1207	84		TFRC Y20	TNK2 Y859	81		CTNND1 Y228	INSR Y1185	40		EPHB1 Y600	PTK2 Y397	62
ERBB2 Y1248	SHC1 Y349 Y350	40		EPHB1 Y600	MAPK3 Y204	39		ANXA2 Y30	INSR Y1185	84		CRKL Y132	SHC1 Y427	81		SHC1 Y427	GSK3B Y216	40		MAPK3 Y204	GPRC5A Y347	62
EPHA2 Y772	SGK223 Y413	40		EGFR Y1092	ANXA2 Y238	39		ANXA2 Y30	GPRC5A Y347	84		EFNB2 Y304	CDK2 Y15	81		ANXA2 Y30	EPHB1 Y600	40		SHC1 Y349 Y350	EPHA2 Y588	61
EPHA2 Y575	CTNND1 Y228	40		PXN S84 Y88	PTK2 Y397	38		DSC3 Y818	GRLF1 Y1105	84		PTPRA Y798	LDLR Y845	81		BCAR1 Y387	FYN Y420	40		GIT1 Y545	ALB Y164	61
EFNB2 Y304	DSC3 Y818	40		SHC1 Y349 Y350	ANXA2 Y238	38		DSC3 Y818	STAT3 Y705	84		PTPRA Y798	SHB Y268	81		GPRC5A Y347	ALB Y164	40		PTPRA Y798	SHC1 Y349	61
CTNND1 Y228	MAPK1 Y187	40		GIT1 Y545	INSR Y1185	38		PIK3R2 Y464	GRLF1 Y1105	83		ANXA2 Y24	DYRK1A Y321	81		ATA2 Y20	FYN Y420	39		ANXA2 Y24	PTRF Y308	61
CTNND1 Y228	MAPK3 Y204	40		PTPRA Y798	MAPK1 T185 Y187	38		EPHA2 Y772	LDLR Y845	83		EGFR Y1172	ITGB4 Y1207	81		STAT3 Y704	SHC1 Y349	39		MAPK1 T185 Y187	FYN Y420	61
CDK2 Y15	PTK2 Y576	40		INPPL1 Y986	ANXA2 Y238	38		ERBB2 Y1248	CTNND1 Y228	82		ITGB4 Y1207	TNK2 Y859	81		PIK3R2 Y464	STAT3 Y705	39		INPPL1 Y986	PTK2 Y576	61
TFRC Y20	EGFR Y1092	39		TNK2 Y859	ANXA2 Y238	38		EFNB2 Y304	LDLR Y845	82		ITGB4 Y1207	GRLF1 Y1105	81		TFRC Y20	SHC1 Y349 Y350	39		EPHA2 Y772	FYN Y420	61
PTRF Y308	PTK2 Y397	39		DSC3 Y818	PTPN11 Y62	38		FAM59A Y453	MAPK14 Y182	82		INSR Y1185	GPRC5A Y347	81		TFRC Y20	SHB Y268	39		DSC3 Y818	EPHB1 Y600	61
PRPF4B Y849	ACP1 Y132	39		CAV1 Y14	ANXA2 Y238	38		EPHA2 Y588	BCAR1 Y249	82		MAPK14 Y182	PKP3 Y176	81		CRKL Y132	ANXA2 Y238	39		CAV1 Y14	SGK223 Y413	61
PRPF4B Y849	PTK2 Y576	39		GRLF1 Y1105	PTRF Y308	38		ATA2 Y20	STAT3 Y705	81		INSR Y1189	ERBB2 Y1248	80		SHC1 Y349 Y350	SKT Y393	39		CAV1 Y14	MPZL1 Y263	61
MPZL1 Y263	ANXA2 Y238	39		DYRK1A Y321	PKP3 Y176	38		STAT3 Y704	AFAP1L2 Y413	81		ERBB2 Y1248	CAV1 Y14	80		CTNND1 Y228	PTPRA Y798	39		SGK223 Y413	SHB Y268	61
EFNB2 Y304	FAM59A Y453	39		LDLR Y845	PTK2 Y397	38		ERBB2 Y1248	PTPN11 Y62	81		PIK3R2 Y464	SHC1 Y349 Y350	80		PTPRA Y798	SHC1 Y349	39		BCAR1 Y387	ANXA2 Y238	61
EFNB2 Y304	PXN Y118	39		PTK2 Y397	MPZL1 Y263	38		EGFR Y1197	PKP3 Y176	81		PIK3R2 Y464	INSR Y1185	80		RIN1 Y36	ERBB2IP Y1104	39		PTRF Y308	PTK2 Y397	61
EFNB2 Y304	PTK2 Y576	39		PXN S84 Y88	STAT3 Y705	37		INPPL1 Y986	MAPK14 Y182	81		ANXA2 Y24	BCAR1 Y249	80		MAPK1 T185 Y187	MAPK14 Y182	39		SHB Y268	ERBB2IP Y1104	61
DSC3 Y818	ACP1 Y132	39		TFRC Y20	EPHA2 Y575	37		BCAR1 Y387	LDLR Y845	81		MAPK1 Y187	GPRC5A Y347	80		TNK2 Y859	GSK3B Y216	39		SHC1 Y349 Y350	FAM59A Y453	60
BCAR1 Y327	EPHA2 Y575	39		EFNB2 Y304	PTPRA Y798	37		MAPK14 Y182	EGFR Y1092	81		BCAR3 Y266	ENO1 Y44	80		GRLF1 Y1105	ERBB2IP Y1104	39		CDK2 Y15	EGFR Y1172	60
BCAR1 Y234	PXN Y118	39		PXN Y118	PRPF4B Y849	37		SH2D3A Y231 S218	TNK2 Y859	80		BCAR3 Y266	PKP3 Y176	80		MAPK14 Y182	PTK2 Y576	39		FAM59A Y453	PRPF4B Y849	60
ANXA2 Y30	MAPK14 Y182	39		PXN Y118	MAPK3 Y204	37		INPPL1 Y986	GPRC5A Y347	80		BCAR1 Y387	MAPK3 Y204	80		SHC1 Y349	PTRF Y308	39		FAM59A Y453	PKP3 Y176	60
AFAP1L2 Y413	MAPK14 Y182	39		SHC1 Y349	PTPN11 Y62	37		EPHA2 Y772	BCAR1 Y387	80		INSR Y1189	BCAR3 Y266	79		SHC1 Y349	STAT3 Y705	39		PTPRA Y798	EPHA2 Y772	60
TFRC Y20	MAPK14 Y182	38		SHC1 Y349	ANXA2 Y238	37		SGK223 Y413	LDLR Y845	80		BCAR1 Y327	PKP3 Y176	79		PTRF Y308	ACP1 Y132	39		RIN1 Y36	EGFR Y1092	60
SHC1 Y349	MAPK3 Y204	38		INSR Y1189	SGK223 Y413	36		PRPF4B Y849	LDLR Y845	80		PIK3R2 Y464	PKP3 Y176	79		FYN Y420	MPZL1 Y263	39		ANXA2 Y24	MAPK1 Y187	60
SH2D3A Y231 S218	SKT Y393	38		MAPK1 T185 Y187	PTPN11 Y62	36		GRLF1 Y1105	ERBB2IP Y1104	80		CRKL Y132	CAV1 Y14	79		ATA2 Y20	CRKL Y132	38		MAPK1 T185 Y187	PTRF Y308	60
SH2D3A Y231 S218	PTPN11 Y62	38		SHC1 Y427	MAPK14 Y182	36		GPRC5A Y347	EGFR Y1092	80		EFNB2 Y304	DSC3 Y818	79		CRKL Y132	BCAR1 Y249	38		INPPL1 Y986	GSK3B Y216	60
RIN1 Y36	SKT Y393	38		GSK3B Y216	SHB Y268	36		INSR Y1189	INPPL1 Y986	79		EPHA2 Y575	PTK2 Y576	79		EFNB2 Y304	GPRC5A Y347	38		EPHA2 Y772	GPRC5A Y347	60
PXN S84 Y88	PTK2 Y576	38		STAT3 Y705	PTPN11 Y62	36		INSR Y1189	EGFR Y1092	79		CTNND1 Y228	ITGB4 Y1207	79		EPHA2 Y575	ACP1 Y132	38		SGK223 Y413	EPHA2 Y588	60
PTPRA Y798	ERBB2IP Y1104	38		DYRK1A Y321	ANXA2 Y238	36		TFRC Y20	GRLF1 Y1105	79		ANXA2 Y24	MAPK1 T185 Y187	79		BCAR1 Y234	ENO1 Y44	38		PRPF4B Y849	INSR Y1185	60
MAPK1 Y187	SHC1 Y349	38		PXN S84 Y88	SH2D3A Y231 S218	35		EFNB2 Y304	ALB Y164	79		INPPL1 Y986	INSR Y1185	79		BCAR1 Y234	LDLR Y845	38		ATA2 Y20	CTNND1 Y228	59
ITGB4 Y1207	MAPK14 Y182	38		PXN S84 Y88	DSC3 Y818	35		CTNND1 Y228	MAPK14 Y182	79		SHB Y268	ANXA2 Y238	79		PXN Y118	MPZL1 Y263	38		ERBB2 Y1248	BCAR1 Y249	59
INSR Y1189	MAPK14 Y182	38		STAT3 Y704	PTRF Y308	35		PXN Y118	BCAR3 Y266	79		ERBB2 Y1248	PXN Y118	78		RIN1 Y36	ANXA2 Y30	38		TFRC Y20	EGFR Y1197	59
INSR Y1185	MAPK14 Y182	38		SHC1 Y349 Y350	MAPK14 Y182	35		ITGB4 Y1207	DSC3 Y818	79		SH2D3A Y231 S218	INPPL1 Y986	78		MAPK1 T185 Y187	SHB Y268	38		SH2D3A Y231 S218	PRPF4B Y849	59
GIT1 Y545	ACP1 Y132	38		SHC1 Y349 Y350	LDLR Y845	35		INSR Y1189	ANXA2 Y30	78		SH2D3A Y231 S218	PKP3 Y176	78		ANXA2 Y30	GRLF1 Y1105	38		SH2D3A Y231 S218	EPHA2 Y588 Y594	59
ERBB2 Y1248	DYRK1A Y321	38		SH2D3A Y231 S218	PXN Y118	35		BCAR1 Y327	BCAR3 Y266	78		GIT1 Y545	MAPK14 Y182	78		DSC3 Y818	PRPF4B Y849	38		EPHA2 Y575	PTK2 Y576	59
ERBB2 Y1248	MPZL1 Y263	38		FAM59A Y453	GSK3B Y216	35		PIK3R2 Y464	ITGB4 Y1207	78		FAM59A Y453	DSC3 Y818	78		PRPF4B Y849	GPRC5A Y347	38		GIT1 Y545	ERBB2IP Y1104	59
EPHA2 Y575	FAM59A Y453	38		CTNND1 Y228	EPHA2 Y588	35		TFRC Y20	SHB Y268	78		PTPRA Y798	ACP1 Y132	78		BCAR1 Y387	LDLR Y845	38		BCAR1 Y234	MAPK3 Y204	59
EFNB2 Y304	PRPF4B Y849	38		PXN Y118	GSK3B Y216	35		CDK2 Y15	GPRC5A Y347	78		PXN Y118	SGK223 Y413	78		DYRK1A Y321	ACP1 Y132	38		BCAR1 Y234	GPRC5A Y347	59
CRKL Y132	MAPK14 Y182	38		EGFR Y1172	LDLR Y845	35		ACP1 Y132	PTK2 Y576	78		EGFR Y1172	ANXA2 Y238	78		ACP1 Y132	SHB Y268	38		CTNND1 Y228	INPPL1 Y986	59
CDK2 Y15	FYN Y420	38		SHC1 Y427	DYRK1A Y321	35		PXN S84 Y88	MAPK1 T185 Y187	77		ENO1 Y44	DYRK1A Y321	78		ATA2 Y20	PTPRA Y798	37		PTPRA Y798	MAPK1 Y187	59
SKT Y393	GSK3B Y216	37		INPPL1 Y986	LDLR Y845	35		INSR Y1185	PTPN11 Y62	77		TNK2 Y859	ANXA2 Y238	78		INSR Y1189	GIT1 Y545	37		ENO1 Y44	TNK2 Y859	59
SHC1 Y427	MAPK14 Y182	37		SGK223 Y413	INSR Y1185	35		INSR Y1189	ACP1 Y132	76		GSK3B Y216	PKP3 Y176	78		PXN S84 Y88	MAPK14 Y182	37		DSC3 Y818	PTK2 Y397	59
SH2D3A Y231 S218	AFAP1L2 Y413	37		INSR Y1185	ERBB2IP Y1104	35		CRKL Y132	CDK2 Y15	76		CRKL Y132	MAPK1 T185 Y187	77		PXN S84 Y88	SHB Y268	37		BCAR1 Y387	LDLR Y845	59
PXN S84 Y88	PRPF4B Y849	37		EPHB1 Y600	GPRC5A Y347	35		SHC1 Y349 Y350	ACP1 Y132	76		CDK2 Y15	FYN Y420	77		ERBB2 Y1248	FAM59A Y453	37		BCAR1 Y387	PTK2 Y576	59
PTRF Y308	ERBB2IP Y1104	37		SHC1 Y349	PTRF Y308	35		GIT1 Y545	LDLR Y845	76		SH2D3A Y231 S218	ACP1 Y132	77		PIK3R2 Y464	EFNB2 Y304	37		EPHA2 Y588 Y594	INSR Y1185	59
PTK2 Y397	ERBB2IP Y1104	37		STAT3 Y705	EPHA2 Y588	35		CTNND1 Y228	SHC1 Y349	76		PXN Y118	PTK2 Y397	77		SHC1 Y349 Y350	EGFR Y1197	37		DYRK1A Y321	EPHA2 Y588	59
PIK3R2 Y464	FYN Y420	37		PXN S84 Y88	ANXA2 Y24	34		AFAP1L2 Y413	STAT3 Y705	76		AFAP1L2 Y413	TNK2 Y859	77		GIT1 Y545	INSR Y1185	37		BCAR1 Y249	PTK2 Y576	59
LDLR Y845	ALB Y164	37		ERBB2 Y1248	TFRC Y20	34		RIN1 Y36	DYRK1A Y321	76		MAPK1 Y187	BCAR1 Y387	77		EGFR Y1197	PTPRA Y798	37		PXN S84 Y88	EGFR Y1197	58
INSR Y1189	PXN S84 Y88	37		TFRC Y20	GSK3B Y216	34		TNK2 Y859	CAV1 Y14	76		BCAR3 Y266	PTK2 Y576	77		CTNND1 Y228	SKT Y393	37		TFRC Y20	SHC1 Y427	58
GPRC5A Y347	ANXA2 Y238	37		CRKL Y132	LDLR Y845	34		SGK223 Y413	PTRF Y308	76		ANXA2 Y30	MPZL1 Y263	77		CTNND1 Y228	GRLF1 Y1105	37		CRKL Y132	EPHB1 Y600	58
GIT1 Y545	MPZL1 Y263	37		PTPRA Y798	PXN Y118	34		SHC1 Y349 Y350	LDLR Y845	75		CAV1 Y14	INSR Y1185	77		AFAP1L2 Y413	PKP3 Y176	37		SH2D3A Y231 S218	PTPN11 Y62	58
EPHB1 Y600	PKP3 Y176	37		ANXA2 Y30	DYRK1A Y321	34		CTNND1 Y228	EGFR Y1172	75		MAPK3 Y204	GPRC5A Y347	77		BCAR3 Y266	LDLR Y845	37		FAM59A Y453	PTPRA Y798	58
EPHA2 Y588 Y594	PKP3 Y176	37		TNK2 Y859	LDLR Y845	34		CTNND1 Y228	SHC1 Y427	75		BCAR1 Y249	EGFR Y1092	77		EPHA2 Y772	EPHA2 Y588 Y594	37		CTNND1 Y228	SHB Y268	58
EPHA2 Y575	DSC3 Y818	37		SKT Y393	EPHA2 Y588	34		MAPK1 T185 Y187	ANXA2 Y30	75		INSR Y1189	LDLR Y845	76		EPHA2 Y772	ANXA2 Y238	37		BCAR3 Y266	DYRK1A Y321	58
EPHA2 Y575	GRLF1 Y1105	37		CAV1 Y14	LDLR Y845	34		INPPL1 Y986	PKP3 Y176	75		EFNB2 Y304	MPZL1 Y263	76		PRPF4B Y849	ERBB2IP Y1104	37		GRLF1 Y1105	PTK2 Y576	58
CDK2 Y15	SKT Y393	37		DYRK1A Y321	FYN Y420	34		SKT Y393	DYRK1A Y321	75		CDK2 Y15	MAPK1 T185 Y187	76		ATA2 Y20	MAPK14 Y182	36		INSR Y1185	EPHA2 Y588	58
AFAP1L2 Y413	MPZL1 Y263	37		LDLR Y845	EGFR Y1092	34		CAV1 Y14	PTPN11 Y62	75		SH2D3A Y231 S218	DSC3 Y818	76		BCAR1 Y327	TFRC Y20	36		INSR Y1185	PTPN11 Y62	58
TFRC Y20	INPPL1 Y986	36		ATA2 Y20	PXN S84 Y88	33		PKP3 Y176	EGFR Y1092	75		SH2D3A Y231 S218	PTPN11 Y62	76		EPHA2 Y575	LDLR Y845	36		TFRC Y20	ALB Y164	57
SHC1 Y349	ANXA2 Y238	36		ATA2 Y20	DYRK1A Y321	33		PXN S84 Y88	MPZL1 Y263	74		PTPRA Y798	CAV1 Y14	76		BCAR1 Y234	EPHA2 Y588 Y594	36		CRKL Y132	INSR Y1185	57
SGK223 Y413	EPHB1 Y600	36		PXN S84 Y88	ANXA2 Y30	33		STAT3 Y704	SHC1 Y349 Y350	74		AFAP1L2 Y413	PTRF Y308	76		PTPRA Y798	ANXA2 Y24	36		FAM59A Y453	EGFR Y1092	57
PXN S84 Y88	INSR Y1185	36		PXN S84 Y88	GRLF1 Y1105	33		STAT3 Y704	SH2D3A Y231 S218	74		AFAP1L2 Y413	EGFR Y1092	76		AFAP1L2 Y413	GRLF1 Y1105	36		CTNND1 Y228	SHC1 Y427	57
INSR Y1189	GPRC5A Y347	36		EPHA2 Y575	EPHB1 Y600	33		SHC1 Y349 Y350	ANXA2 Y30	74		BCAR3 Y266	ANXA2 Y30	76		EGFR Y1172	ERBB2IP Y1104	36		AFAP1L2 Y413	MAPK1 Y187	57
INSR Y1185	GPRC5A Y347	36		PXN Y118	MAPK1 T185 Y187	33		EFNB2 Y304	EPHA2 Y588	74		SHC1 Y427	ANXA2 Y30	76		EPHA2 Y772	LDLR Y845	36		ANXA2 Y24	GPRC5A Y347	57
ERBB2 Y1248	SHC1 Y349	36		PXN Y118	EPHA2 Y772	33		FAM59A Y453	ANXA2 Y30	74		ANXA2 Y30	SGK223 Y413	76		ENO1 Y44	SHC1 Y349	36		INPPL1 Y986	PRPF4B Y849	57
EPHA2 Y588 Y594	GRLF1 Y1105	36		DSC3 Y818	PTRF Y308	33		ANXA2 Y24	INPPL1 Y986	74		ENO1 Y44	EPHA2 Y588	76		ITGB4 Y1207	SKT Y393	36		INPPL1 Y986	PKP3 Y176	57
EPHA2 Y588 Y594	MPZL1 Y263	36		ERBB2 Y1248	SHC1 Y349	32		ANXA2 Y24	EGFR Y1092	74		BCAR1 Y387	EGFR Y1092	76		ITGB4 Y1207	ACP1 Y132	36		ENO1 Y44	PTK2 Y397	57
EPHA2 Y575	PKP3 Y176	36		CRKL Y132	GIT1 Y545	32		MAPK1 Y187	PTRF Y308	74		EPHA2 Y588 Y594	MPZL1 Y263	76		BCAR1 Y387	ACP1 Y132	36		ITGB4 Y1207	EGFR Y1092	57
ENO1 Y44	ERBB2IP Y1104	36		CRKL Y132	PTPRA Y798	32		TNK2 Y859	ANXA2 Y238	74		ERBB2IP Y1104	PTK2 Y576	76		MAPK14 Y182	ACP1 Y132	36		DSC3 Y818	PTPN11 Y62	57
ALB Y164	ANXA2 Y238	36		CRKL Y132	AFAP1L2 Y413	32		MAPK14 Y182	GPRC5A Y347	74		TFRC Y20	SH2D3A Y231 S218	75		LDLR Y845	MPZL1 Y263	36		MAPK14 Y182	ALB Y164	57
AFAP1L2 Y413	EPHA2 Y772	36		EFNB2 Y304	PXN Y118	32		DYRK1A Y321	ACP1 Y132	74		SH2D3A Y231 S218	LDLR Y845	75		INSR Y1189	BCAR1 Y327	35		INSR Y1189	PRPF4B Y849	56
TFRC Y20	ALB Y164	35		CDK2 Y15	PTPN11 Y62	32		ATA2 Y20	SGK223 Y413	73		EPHA2 Y575	CAV1 Y14	75		STAT3 Y704	MPZL1 Y263	35		BCAR1 Y327	SHC1 Y349 Y350	56
SKT Y393	PTK2 Y576	35		EPHA2 Y575	FAM59A Y453	32		CDK2 Y15	FYN Y420	73		EGFR Y1197	PRPF4B Y849	75		BCAR1 Y327	INSR Y1185	35		PIK3R2 Y464	SKT Y393	56
SHC1 Y349 Y350	ANXA2 Y238	35		EPHA2 Y575	SHB Y268	32		EGFR Y1197	CTNND1 Y228	73		BCAR1 Y234	PTPRA Y798	75		BCAR1 Y327	ANXA2 Y238	35		EFNB2 Y304	INSR Y1185	56
PTK2 Y397	MPZL1 Y263	35		EGFR Y1197	MAPK14 Y182	32		ANXA2 Y24	MAPK1 Y187	73		AFAP1L2 Y413	MAPK3 Y204	75		PIK3R2 Y464	EPHB1 Y600	35		CDK2 Y15	CAV1 Y14	56
PRPF4B Y849	FYN Y420	35		ANXA2 Y24	EPHA2 Y588 Y594	32		INPPL1 Y986	INSR Y1185	73		RIN1 Y36	EGFR Y1172	75		SH2D3A Y231 S218	PXN Y118	35		GIT1 Y545	BCAR3 Y266	56
INSR Y1189	EFNB2 Y304	35		SGK223 Y413	MAPK3 Y204	32		ENO1 Y44	TNK2 Y859	73		TNK2 Y859	BCAR1 Y387	75		EPHA2 Y575	MAPK14 Y182	35		BCAR1 Y234	AFAP1L2 Y413	56
GIT1 Y545	SKT Y393	35		GSK3B Y216	STAT3 Y705	32		INSR Y1185	EGFR Y1092	73		PRPF4B Y849	SHB Y268	75		EGFR Y1197	ANXA2 Y30	35		PXN Y118	EPHA2 Y588	56
FAM59A Y453	EPHA2 Y772	35		ERBB2IP Y1104	PTPN11 Y62	32		EPHB1 Y600	DYRK1A Y321	73		EPHB1 Y600	ALB Y164	75		PTPRA Y798	ERBB2IP Y1104	35		AFAP1L2 Y413	CAV1 Y14	56
ERBB2 Y1248	PTRF Y308	35		ALB Y164	PTK2 Y576	32		MAPK3 Y204	PTRF Y308	73		EPHB1 Y600	PTPN11 Y62	75		PXN Y118	GRLF1 Y1105	35		AFAP1L2 Y413	INSR Y1185	56
EPHA2 Y588 Y594	SHC1 Y349	35		PXN S84 Y88	PKP3 Y176	31		FYN Y420	PKP3 Y176	73		ATA2 Y20	EPHA2 Y588	74		MAPK1 Y187	PRPF4B Y849	35		RIN1 Y36	ANXA2 Y30	56
EPHA2 Y588 Y594	PTK2 Y397	35		STAT3 Y704	DYRK1A Y321	31		STAT3 Y704	ANXA2 Y238	72		PXN S84 Y88	BCAR1 Y387	74		MAPK1 T185 Y187	PTK2 Y397	35		BCAR3 Y266	EPHA2 Y588	56
EPHA2 Y575	BCAR3 Y266	35		STAT3 Y704	EPHA2 Y588	31		CRKL Y132	ANXA2 Y30	72		ERBB2 Y1248	PKP3 Y176	74		CAV1 Y14	ERBB2IP Y1104	35		SHC1 Y427	EPHA2 Y588 Y594	56
ENO1 Y44	PTK2 Y397	35		EFNB2 Y304	PTRF Y308	31		CTNND1 Y228	MAPK1 Y187	72		BCAR1 Y234	TNK2 Y859	74		GRLF1 Y1105	ACP1 Y132	35		BCAR1 Y387	MPZL1 Y263	56
CAV1 Y14	MAPK14 Y182	35		EFNB2 Y304	PTPN11 Y62	31		INPPL1 Y986	PTRF Y308	72		AFAP1L2 Y413	MAPK1 T185 Y187	74		EPHB1 Y600	GPRC5A Y347	35		GRLF1 Y1105	MAPK14 Y182	56
CAV1 Y14	ERBB2IP Y1104	35		PXN Y118	ACP1 Y132	31		INPPL1 Y986	MPZL1 Y263	72		MAPK1 T185 Y187	PTRF Y308	74		STAT3 Y705	MPZL1 Y263	35		GRLF1 Y1105	SHB Y268	56
ATA2 Y20	ERBB2IP Y1104	35		RIN1 Y36	MAPK14 Y182	31		BCAR1 Y387	EPHA2 Y588	72		TFRC Y20	EFNB2 Y304	73		MPZL1 Y263	ALB Y164	35		SHC1 Y349	ERBB2IP Y1104	56
ANXA2 Y30	LDLR Y845	35		RIN1 Y36	DYRK1A Y321	31		EPHA2 Y588 Y594	SHB Y268	72		CRKL Y132	EFNB2 Y304	73		ERBB2 Y1248	PIK3R2 Y464	34		MAPK3 Y204	BCAR1 Y249	56
ANXA2 Y24	GPRC5A Y347	35		SHC1 Y427	ACP1 Y132	31		PTRF Y308	EGFR Y1092	72		SHC1 Y349 Y350	BCAR1 Y249	73		BCAR1 Y327	CDK2 Y15	34		INSR Y1189	BCAR3 Y266	55
AFAP1L2 Y413	EPHB1 Y600	35		ITGB4 Y1207	SHB Y268	31		GSK3B Y216	LDLR Y845	72		SH2D3A Y231 S218	GSK3B Y216	73		BCAR1 Y327	LDLR Y845	34		INSR Y1189	EPHA2 Y588 Y594	55
TFRC Y20	PTK2 Y397	34		MAPK3 Y204	DYRK1A Y321	31		DYRK1A Y321	ALB Y164	72		FAM59A Y453	INPPL1 Y986	73		PIK3R2 Y464	SGK223 Y413	34		INSR Y1189	EPHA2 Y588	55
SHC1 Y427	ERBB2IP Y1104	34		STAT3 Y704	PTPN11 Y62	30		MPZL1 Y263	EGFR Y1092	72		PXN Y118	MAPK14 Y182	73		EPHA2 Y575	ERBB2IP Y1104	34		ERBB2 Y1248	PTPN11 Y62	55
SHC1 Y349 Y350	EPHA2 Y588 Y594	34		ERBB2 Y1248	ITGB4 Y1207	30		BCAR1 Y327	PTPRA Y798	71		AFAP1L2 Y413	MAPK1 Y187	73		FAM59A Y453	ALB Y164	34		PIK3R2 Y464	EPHA2 Y772	55
SH2D3A Y231 S218	ANXA2 Y24	34		CRKL Y132	GPRC5A Y347	30		SHC1 Y349 Y350	PXN Y118	71		ANXA2 Y24	BCAR3 Y266	73		ANXA2 Y30	CAV1 Y14	34		EFNB2 Y304	EGFR Y1197	55
PTPRA Y798	BCAR3 Y266	34		SHC1 Y349 Y350	ACP1 Y132	30		PXN Y118	MAPK1 T185 Y187	71		ANXA2 Y24	EPHA2 Y588	73		ENO1 Y44	PTPN11 Y62	34		SH2D3A Y231 S218	BCAR3 Y266	55
MAPK3 Y204	ACP1 Y132	34		FAM59A Y453	ITGB4 Y1207	30		ANXA2 Y24	MAPK3 Y204	71		ANXA2 Y30	INSR Y1185	73		SKT Y393	PRPF4B Y849	34		SH2D3A Y231 S218	EPHA2 Y588	55
MAPK1 Y187	ACP1 Y132	34		SHC1 Y427	ENO1 Y44	30		EGFR Y1172	DYRK1A Y321	71		TNK2 Y859	SGK223 Y413	73		PRPF4B Y849	STAT3 Y705	34		FAM59A Y453	PXN Y118	55
ITGB4 Y1207	FYN Y420	34		GRLF1 Y1105	DYRK1A Y321	30		TNK2 Y859	PTK2 Y397	71		DSC3 Y818	EPHB1 Y600	73		PTRF Y308	LDLR Y845	34		RIN1 Y36	PKP3 Y176	55
EPHA2 Y575	BCAR1 Y387	34		SHC1 Y349	ACP1 Y132	30		SHC1 Y349	DYRK1A Y321	71		MAPK14 Y182	SHB Y268	73		DYRK1A Y321	GPRC5A Y347	34		SHC1 Y349	MAPK3 Y204	55
EPHA2 Y575	SHC1 Y349	34		PXN S84 Y88	PTPRA Y798	29		STAT3 Y705	PTK2 Y576	71		ATA2 Y20	MPZL1 Y263	72		EPHA2 Y588	PTK2 Y576	34		PTK2 Y397	SHB Y268	55
EPHA2 Y575	GPRC5A Y347	34		PXN S84 Y88	MPZL1 Y263	29		STAT3 Y704	ENO1 Y44	70		INSR Y1189	ALB Y164	72		FYN Y420	GPRC5A Y347	34		EGFR Y1092	PTPN11 Y62	55
EPHA2 Y575	PTK2 Y397	34		ERBB2 Y1248	CTNND1 Y228	29		MAPK1 T185 Y187	LDLR Y845	70		PXN S84 Y88	INPPL1 Y986	72		INSR Y1189	SHC1 Y349	33		INSR Y1189	BCAR1 Y249	54
EFNB2 Y304	INSR Y1185	34		ERBB2 Y1248	SKT Y393	29		SHC1 Y427	DYRK1A Y321	70		STAT3 Y704	GPRC5A Y347	72		INSR Y1189	ALB Y164	33		INSR Y1189	PTPN11 Y62	54
DSC3 Y818	EPHA2 Y588 Y594	34		ERBB2 Y1248	GSK3B Y216	29		TNK2 Y859	PTK2 Y576	70		ERBB2 Y1248	SGK223 Y413	72		PXN S84 Y88	GRLF1 Y1105	33		ERBB2 Y1248	PRPF4B Y849	54
CRKL Y132	EPHA2 Y588 Y594	34		TFRC Y20	ITGB4 Y1207	29		SGK223 Y413	GPRC5A Y347	70		EFNB2 Y304	PTRF Y308	72		STAT3 Y704	PRPF4B Y849	33		BCAR1 Y327	LDLR Y845	54
CRKL Y132	PTK2 Y397	34		SHC1 Y349 Y350	ENO1 Y44	29		MPZL1 Y263	PTPN11 Y62	70		SH2D3A Y231 S218	BCAR1 Y234	72		ERBB2 Y1248	ANXA2 Y30	33		BCAR1 Y327	MPZL1 Y263	54
CDK2 Y15	PTPN11 Y62	34		EFNB2 Y304	GPRC5A Y347	29		STAT3 Y704	PTK2 Y576	69		BCAR1 Y234	ANXA2 Y24	72		TFRC Y20	BCAR3 Y266	33		BCAR1 Y327	ANXA2 Y238	54
ANXA2 Y24	ANXA2 Y238	34		SH2D3A Y231 S218	DYRK1A Y321	29		SH2D3A Y231 S218	STAT3 Y705	69		EPHA2 Y588	GPRC5A Y347	72		CRKL Y132	ANXA2 Y24	33		CRKL Y132	BCAR1 Y387	54
AFAP1L2 Y413	SKT Y393	34		CTNND1 Y228	MAPK14 Y182	29		BCAR1 Y234	ANXA2 Y30	69		PTK2 Y397	MPZL1 Y263	72		SHC1 Y349 Y350	EGFR Y1172	33		SHC1 Y349 Y350	PTPN11 Y62	54
SHC1 Y349 Y350	EPHA2 Y575	33		PXN Y118	GPRC5A Y347	29		MAPK3 Y204	DYRK1A Y321	69		PIK3R2 Y464	GIT1 Y545	71		EFNB2 Y304	MAPK14 Y182	33		EFNB2 Y304	EPHB1 Y600	54
SHC1 Y349 Y350	MAPK1 Y187	33		ANXA2 Y24	DYRK1A Y321	29		DYRK1A Y321	ERBB2IP Y1104	69		SHC1 Y349 Y350	RIN1 Y36	71		SH2D3A Y231 S218	SHB Y268	33		SH2D3A Y231 S218	BCAR1 Y249	54
SHC1 Y349 Y350	MAPK3 Y204	33		MAPK1 Y187	EPHA2 Y588 Y594	29		STAT3 Y704	PTK2 Y397	68		SH2D3A Y231 S218	TNK2 Y859	71		EGFR Y1197	PRPF4B Y849	33		EGFR Y1197	FAM59A Y453	54
SHB Y268	PTK2 Y576	33		EGFR Y1172	MAPK14 Y182	29		ERBB2 Y1248	GRLF1 Y1105	68		GIT1 Y545	ITGB4 Y1207	71		FAM59A Y453	FYN Y420	33		MAPK1 T185 Y187	EPHB1 Y600	54
SH2D3A Y231 S218	RIN1 Y36	33		MAPK1 T185 Y187	PTRF Y308	29		BCAR1 Y327	CAV1 Y14	68		BCAR1 Y234	EPHA2 Y588	71		PTPRA Y798	EGFR Y1172	33		MAPK1 T185 Y187	PKP3 Y176	54
SGK223 Y413	ACP1 Y132	33		EPHB1 Y600	PKP3 Y176	29		CDK2 Y15	MPZL1 Y263	68		PXN Y118	ERBB2IP Y1104	71		PTPRA Y798	TNK2 Y859	33		INPPL1 Y986	EPHA2 Y588	54
SGK223 Y413	MPZL1 Y263	33		PXN S84 Y88	EPHA2 Y588 Y594	28		EPHA2 Y575	EPHA2 Y588	68		BCAR3 Y266	GPRC5A Y347	71		ANXA2 Y24	FYN Y420	33		EPHA2 Y772	DYRK1A Y321	54
PXN Y118	SHB Y268	33		PXN S84 Y88	GPRC5A Y347	28		CTNND1 Y228	LDLR Y845	68		BCAR1 Y387	PTRF Y308	71		EGFR Y1172	ANXA2 Y30	33		ITGB4 Y1207	DSC3 Y818	54
PTRF Y308	ANXA2 Y238	33		STAT3 Y704	GSK3B Y216	28		PTPRA Y798	PTK2 Y576	68		GSK3B Y216	SHB Y268	71		ANXA2 Y30	INPPL1 Y986	33		BCAR1 Y387	GPRC5A Y347	54
PTPRA Y798	BCAR1 Y387	33		ERBB2 Y1248	EPHA2 Y575	28		BCAR1 Y387	EPHA2 Y588 Y594	68		STAT3 Y705	GPRC5A Y347	71		ANXA2 Y30	EGFR Y1092	33		EPHA2 Y588 Y594	PTK2 Y576	54
PTPN11 Y62	PTK2 Y576	33		CRKL Y132	EPHA2 Y588 Y594	28		STAT3 Y704	CAV1 Y14	67		DYRK1A Y321	GPRC5A Y347	71		INPPL1 Y986	PRPF4B Y849	33		MAPK3 Y204	EPHA2 Y588	54
PIK3R2 Y464	RIN1 Y36	33		SH2D3A Y231 S218	FAM59A Y453	28		CDK2 Y15	INSR Y1185	67		ATA2 Y20	PTPRA Y798	70		INPPL1 Y986	ERBB2IP Y1104	33		DYRK1A Y321	PKP3 Y176	54
INSR Y1189	MAPK1 Y187	33		GIT1 Y545	MAPK3 Y204	28		ERBB2 Y1248	BCAR1 Y327	66		INSR Y1189	DSC3 Y818	70		ITGB4 Y1207	GRLF1 Y1105	33		ERBB2 Y1248	SH2D3A Y231 S218	53
INSR Y1189	MAPK3 Y204	33		AFAP1L2 Y413	MAPK3 Y204	28		BCAR1 Y327	AFAP1L2 Y413	66		PIK3R2 Y464	CTNND1 Y228	70		DSC3 Y818	GPRC5A Y347	33		TFRC Y20	CAV1 Y14	53
INSR Y1189	MPZL1 Y263	33		TNK2 Y859	MAPK14 Y182	28		SHC1 Y349 Y350	PTPRA Y798	66		PIK3R2 Y464	GRLF1 Y1105	70		SGK223 Y413	MAPK14 Y182	33		CRKL Y132	EGFR Y1092	53
GPRC5A Y347	PKP3 Y176	33		SGK223 Y413	PTK2 Y397	28		EGFR Y1197	DYRK1A Y321	66		TFRC Y20	EPHA2 Y588 Y594	70		PRPF4B Y849	EGFR Y1092	33		BCAR1 Y234	EPHA2 Y588 Y594	53
EPHA2 Y772	INSR Y1185	33		DYRK1A Y321	PTK2 Y397	28		BCAR1 Y234	ITGB4 Y1207	66		SHC1 Y349 Y350	PRPF4B Y849	70		INSR Y1185	SHC1 Y349	33		BCAR1 Y234	MPZL1 Y263	53
EFNB2 Y304	AFAP1L2 Y413	33		PXN S84 Y88	PTPN11 Y62	27		AFAP1L2 Y413	PTPN11 Y62	66		EFNB2 Y304	PXN Y118	70		INSR Y1185	ALB Y164	33		SHC1 Y427	ACP1 Y132	53
ANXA2 Y30	PTPN11 Y62	33		PIK3R2 Y464	ALB Y164	27		ANXA2 Y30	ITGB4 Y1207	66		GIT1 Y545	ALB Y164	70		MAPK3 Y204	GSK3B Y216	33		SKT Y393	EPHB1 Y600	53
AFAP1L2 Y413	ACP1 Y132	33		SH2D3A Y231 S218	SHB Y268	27		SKT Y393	PKP3 Y176	66		GIT1 Y545	ANXA2 Y238	70		DYRK1A Y321	MPZL1 Y263	33		SGK223 Y413	BCAR1 Y387	53
TFRC Y20	CDK2 Y15	32		RIN1 Y36	ACP1 Y132	27		CAV1 Y14	STAT3 Y705	66		CTNND1 Y228	ANXA2 Y238	70		ERBB2IP Y1104	EGFR Y1092	33		DYRK1A Y321	LDLR Y845	53
TFRC Y20	PTPRA Y798	32		MAPK1 T185 Y187	GPRC5A Y347	27		SGK223 Y413	PKP3 Y176	66		PTPRA Y798	PXN Y118	70		INSR Y1189	ERBB2 Y1248	32		EPHA2 Y588	PTK2 Y397	53
SKT Y393	SGK223 Y413	32		ENO1 Y44	SHC1 Y349	27		PRPF4B Y849	PTRF Y308	66		PTPRA Y798	ANXA2 Y24	70		PXN S84 Y88	EPHA2 Y575	32		PKP3 Y176	SHB Y268	53
SHC1 Y349 Y350	EFNB2 Y304	32		ITGB4 Y1207	STAT3 Y705	27		EPHB1 Y600	PKP3 Y176	66		PXN Y118	ALB Y164	70		STAT3 Y704	PTRF Y308	32		ERBB2IP Y1104	ALB Y164	53
PXN Y118	SKT Y393	32		SKT Y393	MAPK14 Y182	27		PKP3 Y176	PTPN11 Y62	66		AFAP1L2 Y413	ANXA2 Y24	70		ERBB2 Y1248	INSR Y1185	32		CRKL Y132	PXN Y118	52
PIK3R2 Y464	SHC1 Y349 Y350	32		EPHA2 Y588 Y594	PKP3 Y176	27		BCAR1 Y327	PIK3R2 Y464	65		EPHA2 Y772	PKP3 Y176	70		SHC1 Y349 Y350	MAPK14 Y182	32		CRKL Y132	INPPL1 Y986	52
MAPK1 Y187	INSR Y1185	32		MAPK3 Y204	ALB Y164	27		BCAR1 Y327	ENO1 Y44	65		ITGB4 Y1207	SHB Y268	70		EFNB2 Y304	FAM59A Y453	32		SHC1 Y349 Y350	BCAR1 Y387	52
INSR Y1189	EPHA2 Y772	32		DYRK1A Y321	SHB Y268	27		BCAR1 Y327	DSC3 Y818	65		GRLF1 Y1105	GSK3B Y216	70		SH2D3A Y231 S218	ITGB4 Y1207	32		SHC1 Y349 Y350	BCAR1 Y249	52
INSR Y1185	MAPK3 Y204	32		ATA2 Y20	EPHA2 Y588 Y594	26		PIK3R2 Y464	PTPN11 Y62	65		GRLF1 Y1105	ANXA2 Y238	70		CTNND1 Y228	EPHA2 Y588	32		EGFR Y1197	DYRK1A Y321	52
INSR Y1185	MPZL1 Y263	32		PXN S84 Y88	ERBB2IP Y1104	26		CRKL Y132	TNK2 Y859	65		ERBB2 Y1248	GIT1 Y545	69		PTPRA Y798	FYN Y420	32		CTNND1 Y228	TNK2 Y859	52
GRLF1 Y1105	MAPK14 Y182	32		GIT1 Y545	PTK2 Y397	26		BCAR1 Y234	DYRK1A Y321	65		ERBB2 Y1248	MAPK14 Y182	69		PTPRA Y798	ANXA2 Y238	32		CTNND1 Y228	GRLF1 Y1105	52
FAM59A Y453	PTPRA Y798	32		ANXA2 Y30	EPHA2 Y588 Y594	26		ANXA2 Y30	PKP3 Y176	65		PIK3R2 Y464	SHB Y268	69		PXN Y118	PKP3 Y176	32		ANXA2 Y24	ALB Y164	52
EPHA2 Y588 Y594	PTRF Y308	32		CAV1 Y14	MAPK14 Y182	26		DSC3 Y818	PTPN11 Y62	65		TFRC Y20	SHC1 Y349	69		TNK2 Y859	ERBB2IP Y1104	32		BCAR3 Y266	MAPK3 Y204	52
EPHA2 Y588 Y594	GPRC5A Y347	32		MAPK14 Y182	EGFR Y1092	26		SHC1 Y349 Y350	TNK2 Y859	64		CTNND1 Y228	GSK3B Y216	69		SKT Y393	SHC1 Y349	32		SHC1 Y427	GSK3B Y216	52
EPHA2 Y575	ALB Y164	32		PTRF Y308	ERBB2IP Y1104	26		SHC1 Y349 Y350	STAT3 Y705	64		PXN Y118	DYRK1A Y321	69		SKT Y393	GPRC5A Y347	32		INSR Y1189	AFAP1L2 Y413	51
EFNB2 Y304	CDK2 Y15	32		PXN S84 Y88	EPHA2 Y575	25		CDK2 Y15	SKT Y393	64		ANXA2 Y24	EGFR Y1092	69		SGK223 Y413	BCAR1 Y249	32		ERBB2 Y1248	ALB Y164	51
EFNB2 Y304	SGK223 Y413	32		CRKL Y132	EPHA2 Y575	25		RIN1 Y36	SHB Y268	64		MAPK1 T185 Y187	MPZL1 Y263	69		GRLF1 Y1105	MAPK14 Y182	32		BCAR1 Y327	CRKL Y132	51
ACP1 Y132	PTK2 Y576	32		EFNB2 Y304	EPHA2 Y575	25		EPHA2 Y772	ITGB4 Y1207	64		INSR Y1185	ACP1 Y132	69		PTRF Y308	STAT3 Y705	32		BCAR1 Y327	SGK223 Y413	51
TNK2 Y859	ERBB2IP Y1104	31		EPHA2 Y575	MAPK1 T185 Y187	25		MAPK14 Y182	PTK2 Y576	64		SHC1 Y349	ANXA2 Y238	69		ACP1 Y132	PTK2 Y576	32		BCAR1 Y327	GPRC5A Y347	51
SKT Y393	MAPK14 Y182	31		EGFR Y1197	MPZL1 Y263	25		LDLR Y845	ACP1 Y132	64		BCAR1 Y249	PTK2 Y576	69		ATA2 Y20	PXN Y118	31		PXN Y118	PRPF4B Y849	51
SHC1 Y349	LDLR Y845	31		FAM59A Y453	DYRK1A Y321	25		ATA2 Y20	ANXA2 Y30	63		INSR Y1189	ANXA2 Y30	68		STAT3 Y704	CTNND1 Y228	31		PXN Y118	EPHA2 Y588 Y594	51
PTRF Y308	PTK2 Y576	31		AFAP1L2 Y413	PTK2 Y397	25		ERBB2 Y1248	ITGB4 Y1207	63		STAT3 Y704	ENO1 Y44	68		CRKL Y132	ANXA2 Y30	31		PXN Y118	PTPN11 Y62	51
PRPF4B Y849	PTPN11 Y62	31		INPPL1 Y986	MAPK14 Y182	25		CRKL Y132	PRPF4B Y849	63		STAT3 Y704	DSC3 Y818	68		SHC1 Y349 Y350	ANXA2 Y238	31		PXN Y118	PTK2 Y576	51
GIT1 Y545	MAPK1 T185 Y187	31		STAT3 Y705	DYRK1A Y321	25		CRKL Y132	MAPK14 Y182	63		STAT3 Y704	PTPN11 Y62	68		EFNB2 Y304	CDK2 Y15	31		PRPF4B Y849	MAPK3 Y204	51
EPHB1 Y600	GSK3B Y216	31		DYRK1A Y321	EPHA2 Y588	25		CDK2 Y15	ERBB2IP Y1104	63		BCAR1 Y327	EGFR Y1197	68		CTNND1 Y228	STAT3 Y705	31		BCAR1 Y387	EPHA2 Y588 Y594	51
EPHA2 Y575	MPZL1 Y263	31		DYRK1A Y321	PTK2 Y576	25		CTNND1 Y228	PXN Y118	63		PIK3R2 Y464	PXN Y118	68		CTNND1 Y228	ANXA2 Y238	31		EPHA2 Y588 Y594	PTK2 Y397	51
EGFR Y1197	ACP1 Y132	31		ATA2 Y20	MAPK14 Y182	24		ENO1 Y44	STAT3 Y705	63		EFNB2 Y304	BCAR3 Y266	68		PTPRA Y798	MAPK14 Y182	31		GPRC5A Y347	PTK2 Y576	51
EFNB2 Y304	SHC1 Y349	31		INSR Y1189	PKP3 Y176	24		MAPK3 Y204	SHB Y268	63		FAM59A Y453	ACP1 Y132	68		PXN Y118	SKT Y393	31		ATA2 Y20	BCAR1 Y387	50
CTNND1 Y228	PTK2 Y397	31		PXN S84 Y88	LDLR Y845	24		STAT3 Y705	PTK2 Y397	63		PXN Y118	ITGB4 Y1207	68		SHC1 Y427	ITGB4 Y1207	31		ERBB2 Y1248	EPHA2 Y575	50
CDK2 Y15	FAM59A Y453	31		ERBB2 Y1248	MAPK14 Y182	24		CDK2 Y15	EPHB1 Y600	62		PXN Y118	ANXA2 Y238	68		EPHA2 Y772	ACP1 Y132	31		ERBB2 Y1248	BCAR1 Y234	50
CDK2 Y15	EPHB1 Y600	31		TFRC Y20	GPRC5A Y347	24		CTNND1 Y228	INPPL1 Y986	62		AFAP1L2 Y413	EGFR Y1172	68		ITGB4 Y1207	ERBB2IP Y1104	31		BCAR1 Y327	EFNB2 Y304	50
BCAR1 Y234	PTPRA Y798	31		CRKL Y132	PTPN11 Y62	24		CTNND1 Y228	EGFR Y1092	62		AFAP1L2 Y413	BCAR3 Y266	68		DSC3 Y818	FYN Y420	31		BCAR1 Y327	ACP1 Y132	50
ANXA2 Y30	EPHA2 Y588 Y594	31		CDK2 Y15	EPHA2 Y588 Y594	24		ANXA2 Y24	SGK223 Y413	62		ANXA2 Y24	SHB Y268	68		CAV1 Y14	FYN Y420	31		TFRC Y20	GRLF1 Y1105	50
ANXA2 Y24	EPHA2 Y588 Y594	31		RIN1 Y36	ENO1 Y44	24		MAPK1 Y187	DYRK1A Y321	62		EGFR Y1172	SGK223 Y413	68		MAPK14 Y182	EPHB1 Y600	31		CRKL Y132	ALB Y164	50
SHC1 Y349	SHB Y268	30		ANXA2 Y24	MAPK14 Y182	24		SGK223 Y413	EPHA2 Y588	62		BCAR3 Y266	INPPL1 Y986	68		ACP1 Y132	ERBB2IP Y1104	31		SHC1 Y349 Y350	RIN1 Y36	50
SH2D3A Y231 S218	PKP3 Y176	30		ANXA2 Y24	PTRF Y308	24		PRPF4B Y849	EPHA2 Y588	62		EPHA2 Y588 Y594	PTPN11 Y62	68		INSR Y1189	DYRK1A Y321	30		SHC1 Y349 Y350	ITGB4 Y1207	50
SH2D3A Y231 S218	PTK2 Y576	30		MAPK1 Y187	LDLR Y845	24		INSR Y1189	PTPN11 Y62	61		INSR Y1185	EGFR Y1092	68		ERBB2 Y1248	PTPRA Y798	30		EFNB2 Y304	BCAR1 Y387	50
SGK223 Y413	MAPK3 Y204	30		MAPK1 Y187	MPZL1 Y263	24		PXN S84 Y88	PKP3 Y176	61		DYRK1A Y321	SHB Y268	68		EPHA2 Y575	ALB Y164	30		CDK2 Y15	ANXA2 Y24	50
SGK223 Y413	SHB Y268	30		ANXA2 Y30	MAPK14 Y182	24		STAT3 Y704	MAPK1 T185 Y187	61		INSR Y1189	SKT Y393	67		EPHA2 Y575	PTK2 Y576	30		CDK2 Y15	INPPL1 Y986	50
RIN1 Y36	EPHA2 Y588 Y594	30		DYRK1A Y321	MPZL1 Y263	24		BCAR1 Y327	SH2D3A Y231 S218	61		BCAR1 Y327	EFNB2 Y304	67		GIT1 Y545	GRLF1 Y1105	30		CDK2 Y15	SHC1 Y349	50
RIN1 Y36	ANXA2 Y238	30		PTK2 Y397	ALB Y164	24		CDK2 Y15	CAV1 Y14	61		EFNB2 Y304	FYN Y420	67		ANXA2 Y24	ALB Y164	30		BCAR1 Y234	SGK223 Y413	50
PXN S84 Y88	EGFR Y1197	30		ATA2 Y20	INSR Y1189	23		CTNND1 Y228	BCAR1 Y249	61		SH2D3A Y231 S218	FAM59A Y453	67		EGFR Y1172	PRPF4B Y849	30		CTNND1 Y228	PRPF4B Y849	50
PRPF4B Y849	LDLR Y845	30		INSR Y1189	ANXA2 Y30	23		BCAR1 Y387	PKP3 Y176	61		EPHA2 Y575	CTNND1 Y228	67		BCAR3 Y266	ANXA2 Y238	30		ANXA2 Y24	INPPL1 Y986	50
PIK3R2 Y464	SHC1 Y349	30		STAT3 Y704	ITGB4 Y1207	23		STAT3 Y705	ANXA2 Y238	61		RIN1 Y36	PKP3 Y176	67		ANXA2 Y30	SKT Y393	30		MAPK1 Y187	SHB Y268	50
MAPK1 Y187	DSC3 Y818	30		ERBB2 Y1248	ENO1 Y44	23		ERBB2 Y1248	MAPK14 Y182	60		ANXA2 Y24	ITGB4 Y1207	67		ANXA2 Y30	MPZL1 Y263	30		EGFR Y1172	ANXA2 Y238	50
MAPK1 Y187	SGK223 Y413	30		ERBB2 Y1248	ACP1 Y132	23		TFRC Y20	MAPK1 T185 Y187	60		ANXA2 Y24	GSK3B Y216	67		INPPL1 Y986	FYN Y420	30		ANXA2 Y30	MAPK14 Y182	50
ERBB2 Y1248	ENO1 Y44	30		PIK3R2 Y464	PXN Y118	23		PTPRA Y798	MAPK1 T185 Y187	60		EGFR Y1172	BCAR1 Y387	67		INSR Y1185	DYRK1A Y321	30		EPHA2 Y772	EPHB1 Y600	50
ERBB2 Y1248	MAPK14 Y182	30		TFRC Y20	SH2D3A Y231 S218	23		SGK223 Y413	MAPK3 Y204	60		ENO1 Y44	STAT3 Y705	67		MAPK14 Y182	PKP3 Y176	30		SGK223 Y413	EGFR Y1092	50
EPHA2 Y772	FYN Y420	30		SHC1 Y349 Y350	EPHA2 Y588 Y594	23		PRPF4B Y849	GPRC5A Y347	60		DSC3 Y818	EPHA2 Y588 Y594	67		SHC1 Y349	EPHA2 Y588	30		BCAR1 Y387	ACP1 Y132	50
EPHA2 Y588	PTK2 Y576	30		SH2D3A Y231 S218	STAT3 Y705	23		BCAR1 Y387	PTRF Y308	60		SGK223 Y413	EPHB1 Y600	67		SHC1 Y349	SHB Y268	30		EPHA2 Y588 Y594	MAPK3 Y204	50
EPHA2 Y575	ANXA2 Y24	30		SH2D3A Y231 S218	ERBB2IP Y1104	23		INSR Y1185	MAPK14 Y182	60		EPHB1 Y600	ANXA2 Y238	67		FYN Y420	ACP1 Y132	30		EPHB1 Y600	ERBB2IP Y1104	50
EFNB2 Y304	SH2D3A Y231 S218	30		SH2D3A Y231 S218	ALB Y164	23		SHB Y268	BCAR1 Y249	60		SHC1 Y349	LDLR Y845	67		FYN Y420	PTK2 Y397	30		MAPK3 Y204	PTPN11 Y62	50
DSC3 Y818	MAPK3 Y204	30		EPHA2 Y575	RIN1 Y36	23		STAT3 Y704	CRKL Y132	59		SHC1 Y349	PTPN11 Y62	67		FYN Y420	EGFR Y1092	30		DYRK1A Y321	ANXA2 Y238	50
CRKL Y132	PTK2 Y576	30		EGFR Y1197	LDLR Y845	23		CRKL Y132	STAT3 Y705	59		STAT3 Y704	PTRF Y308	66		MPZL1 Y263	ERBB2IP Y1104	30		GPRC5A Y347	PTK2 Y397	50
CDK2 Y15	MAPK14 Y182	30		CTNND1 Y228	ACP1 Y132	23		CTNND1 Y228	ERBB2IP Y1104	59		TFRC Y20	EPHB1 Y600	66		INSR Y1189	FYN Y420	29		MPZL1 Y263	ERBB2IP Y1104	50
ATA2 Y20	ACP1 Y132	30		ANXA2 Y24	PTPN11 Y62	23		SGK223 Y413	INSR Y1185	59		EPHA2 Y575	GRLF1 Y1105	66		STAT3 Y704	AFAP1L2 Y413	29		MPZL1 Y263	EGFR Y1092	50
ANXA2 Y30	EPHA2 Y588	30		EGFR Y1172	EPHA2 Y588 Y594	23		PTK2 Y397	PTPN11 Y62	59		GIT1 Y545	PTPRA Y798	66		STAT3 Y704	ERBB2IP Y1104	29		ATA2 Y20	EPHB1 Y600	49
AFAP1L2 Y413	SHB Y268	30		INPPL1 Y986	EPHA2 Y588 Y594	23		INSR Y1189	TNK2 Y859	58		GIT1 Y545	SKT Y393	66		BCAR1 Y327	EPHA2 Y588 Y594	29		ATA2 Y20	MAPK3 Y204	49
SKT Y393	PRPF4B Y849	29		DSC3 Y818	MAPK14 Y182	23		CRKL Y132	BCAR1 Y387	58		BCAR1 Y234	EGFR Y1172	66		PIK3R2 Y464	EPHA2 Y588	29		BCAR1 Y327	RIN1 Y36	49
PRPF4B Y849	ANXA2 Y238	29		SKT Y393	ACP1 Y132	23		INPPL1 Y986	DYRK1A Y321	58		BCAR1 Y234	SHC1 Y427	66		SHC1 Y349 Y350	INPPL1 Y986	29		BCAR1 Y327	EPHA2 Y588 Y594	49
MPZL1 Y263	PTK2 Y576	29		SHC1 Y349	EPHA2 Y588	23		GRLF1 Y1105	MAPK3 Y204	58		FAM59A Y453	EPHA2 Y588	66		SHC1 Y349 Y350	DSC3 Y818	29		EFNB2 Y304	PXN Y118	49
MAPK14 Y182	ALB Y164	29		PTRF Y308	DYRK1A Y321	23		MAPK14 Y182	MPZL1 Y263	58		FAM59A Y453	ANXA2 Y238	66		SHC1 Y349 Y350	EGFR Y1092	29		GIT1 Y545	GRLF1 Y1105	49
MAPK1 Y187	GRLF1 Y1105	29		DYRK1A Y321	ERBB2IP Y1104	23		DYRK1A Y321	EGFR Y1092	58		PTPRA Y798	ENO1 Y44	66		EFNB2 Y304	SH2D3A Y231 S218	29		BCAR1 Y234	PRPF4B Y849	49
LDLR Y845	PTK2 Y576	29		INSR Y1189	ANXA2 Y24	22		PXN S84 Y88	DYRK1A Y321	57		PTPRA Y798	EGFR Y1092	66		FAM59A Y453	DYRK1A Y321	29		BCAR1 Y234	PTPN11 Y62	49
INSR Y1189	ACP1 Y132	29		INSR Y1189	GRLF1 Y1105	22		PXN S84 Y88	LDLR Y845	57		PXN Y118	EPHA2 Y588 Y594	66		CTNND1 Y228	SHB Y268	29		AFAP1L2 Y413	INPPL1 Y986	49
GRLF1 Y1105	MAPK3 Y204	29		PXN S84 Y88	FYN Y420	22		ERBB2 Y1248	CDK2 Y15	57		PXN Y118	PTK2 Y576	66		PTPRA Y798	INPPL1 Y986	29		ANXA2 Y24	EGFR Y1092	49
FAM59A Y453	DYRK1A Y321	29		TFRC Y20	EPHA2 Y772	22		CDK2 Y15	AFAP1L2 Y413	57		ANXA2 Y24	PRPF4B Y849	66		PTPRA Y798	ACP1 Y132	29		MAPK1 T185 Y187	SHC1 Y427	49
ERBB2 Y1248	PTK2 Y397	29		CRKL Y132	PXN Y118	22		BCAR1 Y234	GRLF1 Y1105	57		MAPK1 Y187	PTRF Y308	66		PTPRA Y798	EGFR Y1092	29		MAPK1 T185 Y187	SGK223 Y413	49
EPHA2 Y575	MAPK14 Y182	29		SHC1 Y349 Y350	PTRF Y308	22		ANXA2 Y24	TNK2 Y859	57		EGFR Y1172	PRPF4B Y849	66		PXN Y118	ANXA2 Y24	29		SHC1 Y427	PRPF4B Y849	49
EPHA2 Y575	PTK2 Y576	29		PTPRA Y798	DYRK1A Y321	22		MAPK1 Y187	SHB Y268	57		EGFR Y1172	MAPK3 Y204	66		ANXA2 Y24	ITGB4 Y1207	29		SHC1 Y427	INSR Y1185	49
ENO1 Y44	PTK2 Y576	29		SHC1 Y427	EPHA2 Y588 Y594	22		ITGB4 Y1207	ALB Y164	57		SHC1 Y427	SHB Y268	66		MAPK1 Y187	ITGB4 Y1207	29		INPPL1 Y986	EPHB1 Y600	49
CRKL Y132	MAPK1 Y187	29		SHC1 Y427	PTRF Y308	22		FYN Y420	GPRC5A Y347	57		INSR Y1185	SHC1 Y349	66		SHC1 Y427	PRPF4B Y849	29		EPHA2 Y588 Y594	BCAR1 Y249	49
CRKL Y132	MAPK3 Y204	29		TNK2 Y859	EPHA2 Y588 Y594	22		PKP3 Y176	ERBB2IP Y1104	57		SHC1 Y349	DYRK1A Y321	66		ANXA2 Y30	EPHA2 Y588 Y594	29		GPRC5A Y347	BCAR1 Y249	49
CDK2 Y15	EPHA2 Y588	29		CAV1 Y14	EPHA2 Y588 Y594	22		INSR Y1189	STAT3 Y704	56		SHC1 Y349	GPRC5A Y347	66		TNK2 Y859	PRPF4B Y849	29		PKP3 Y176	ACP1 Y132	49
ANXA2 Y24	SHB Y268	29		EPHA2 Y588 Y594	EGFR Y1092	22		INSR Y1189	STAT3 Y705	56		PKP3 Y176	PTK2 Y397	66		GRLF1 Y1105	SHC1 Y349	29		PTK2 Y397	PTPN11 Y62	49
AFAP1L2 Y413	BCAR3 Y266	29		GRLF1 Y1105	MAPK14 Y182	22		STAT3 Y704	ANXA2 Y24	56		ERBB2 Y1248	ITGB4 Y1207	65		INSR Y1185	FYN Y420	29		PTPN11 Y62	PTK2 Y576	49
TFRC Y20	STAT3 Y705	28		GRLF1 Y1105	EPHA2 Y588	22		BCAR1 Y327	CRKL Y132	56		ERBB2 Y1248	ANXA2 Y238	65		SHC1 Y349	ANXA2 Y238	29		ERBB2 Y1248	INSR Y1185	48
STAT3 Y704	TFRC Y20	28		EPHB1 Y600	PTK2 Y576	22		BCAR1 Y327	MAPK14 Y182	56		CDK2 Y15	MAPK1 Y187	65		GPRC5A Y347	SHB Y268	29		PIK3R2 Y464	EFNB2 Y304	48
SHC1 Y427	SKT Y393	28		EPHA2 Y588	ERBB2IP Y1104	22		PIK3R2 Y464	CDK2 Y15	56		CDK2 Y15	EPHB1 Y600	65		ACP1 Y132	ALB Y164	29		CRKL Y132	BCAR1 Y234	48
SHC1 Y349 Y350	LDLR Y845	28		ALB Y164	ANXA2 Y238	22		CDK2 Y15	DSC3 Y818	56		GIT1 Y545	PRPF4B Y849	65		INSR Y1189	CDK2 Y15	28		GIT1 Y545	INPPL1 Y986	48
SHC1 Y349	PTPN11 Y62	28		INSR Y1189	TFRC Y20	21		CDK2 Y15	PKP3 Y176	56		GIT1 Y545	PTK2 Y397	65		PXN S84 Y88	ERBB2IP Y1104	28		EGFR Y1197	MAPK1 T185 Y187	48
PIK3R2 Y464	PKP3 Y176	28		ERBB2 Y1248	GPRC5A Y347	21		GIT1 Y545	BCAR1 Y234	56		BCAR1 Y234	PKP3 Y176	65		ERBB2 Y1248	EPHA2 Y575	28		EGFR Y1197	SGK223 Y413	48
LDLR Y845	PKP3 Y176	28		CDK2 Y15	PTK2 Y576	21		GIT1 Y545	EPHA2 Y588	56		MAPK1 Y187	EGFR Y1172	65		ERBB2 Y1248	MAPK14 Y182	28		EGFR Y1197	MPZL1 Y263	48
INSR Y1185	ACP1 Y132	28		CTNND1 Y228	ENO1 Y44	21		CTNND1 Y228	EPHB1 Y600	56		EGFR Y1172	INSR Y1185	65		ERBB2 Y1248	MAPK3 Y204	28		BCAR1 Y234	ACP1 Y132	48
INSR Y1185	SHB Y268	28		CTNND1 Y228	ALB Y164	21		RIN1 Y36	ANXA2 Y30	56		ANXA2 Y30	PTK2 Y397	65		TFRC Y20	PTPRA Y798	28		CTNND1 Y228	DSC3 Y818	48
FAM59A Y453	EPHB1 Y600	28		RIN1 Y36	EPHB1 Y600	21		RIN1 Y36	LDLR Y845	56		TNK2 Y859	PRPF4B Y849	65		CRKL Y132	MAPK1 Y187	28		AFAP1L2 Y413	BCAR1 Y387	48
ERBB2 Y1248	MAPK1 T185 Y187	28		ANXA2 Y24	EPHB1 Y600	21		ANXA2 Y24	PRPF4B Y849	56		DSC3 Y818	STAT3 Y705	65		SHC1 Y349 Y350	CDK2 Y15	28		RIN1 Y36	GPRC5A Y347	48
EPHA2 Y575	BCAR1 Y234	28		EGFR Y1172	PTRF Y308	21		EGFR Y1172	SHB Y268	56		PRPF4B Y849	EPHB1 Y600	65		SHC1 Y349 Y350	EPHA2 Y588	28		ANXA2 Y24	ITGB4 Y1207	48
EPHA2 Y575	RIN1 Y36	28		EGFR Y1172	ACP1 Y132	21		BCAR3 Y266	PTRF Y308	56		MAPK3 Y204	PTRF Y308	65		CDK2 Y15	INSR Y1185	28		ANXA2 Y24	GRLF1 Y1105	48
ENO1 Y44	LDLR Y845	28		ENO1 Y44	SKT Y393	21		SHC1 Y427	SHB Y268	56		STAT3 Y705	PTPN11 Y62	65		EPHA2 Y575	DYRK1A Y321	28		ANXA2 Y24	SHB Y268	48
ENO1 Y44	ANXA2 Y238	28		TNK2 Y859	ACP1 Y132	21		ANXA2 Y30	CAV1 Y14	56		ATA2 Y20	MAPK14 Y182	64		BCAR1 Y234	ACP1 Y132	28		ANXA2 Y24	ANXA2 Y238	48
DSC3 Y818	EPHB1 Y600	28		GRLF1 Y1105	EPHB1 Y600	21		TNK2 Y859	PTRF Y308	56		ERBB2 Y1248	PIK3R2 Y464	64		FAM59A Y453	EPHB1 Y600	28		EGFR Y1172	LDLR Y845	48
DSC3 Y818	LDLR Y845	28		MAPK14 Y182	PKP3 Y176	21		BCAR1 Y387	GPRC5A Y347	56		CRKL Y132	MAPK1 Y187	64		CTNND1 Y228	ENO1 Y44	28		CAV1 Y14	SHB Y268	48
CAV1 Y14	ACP1 Y132	28		ATA2 Y20	INSR Y1185	20		INSR Y1185	FYN Y420	56		CRKL Y132	MAPK3 Y204	64		AFAP1L2 Y413	SHC1 Y349	28		PRPF4B Y849	BCAR1 Y387	48
ANXA2 Y238	PTK2 Y576	28		ATA2 Y20	PTRF Y308	20		SHC1 Y349	SHB Y268	56		CDK2 Y15	MAPK3 Y204	64		AFAP1L2 Y413	STAT3 Y705	28		SHB Y268	ALB Y164	48
TNK2 Y859	MAPK14 Y182	27		INSR Y1189	FAM59A Y453	20		MAPK3 Y204	EPHA2 Y588	56		CDK2 Y15	PTK2 Y397	64		BCAR1 Y249	ALB Y164	28		ATA2 Y20	BCAR1 Y327	47
TFRC Y20	MAPK1 Y187	27		INSR Y1189	RIN1 Y36	20		LDLR Y845	BCAR1 Y249	56		GIT1 Y545	EPHA2 Y772	64		PIK3R2 Y464	ALB Y164	27		CRKL Y132	GRLF1 Y1105	47
TFRC Y20	MAPK3 Y204	27		ERBB2 Y1248	CRKL Y132	20		SH2D3A Y231 S218	PTPN11 Y62	55		GIT1 Y545	EPHA2 Y588 Y594	64		CRKL Y132	MAPK3 Y204	27		EFNB2 Y304	FYN Y420	47
SKT Y393	CAV1 Y14	27		PIK3R2 Y464	GIT1 Y545	20		EGFR Y1197	SHB Y268	55		GIT1 Y545	EPHA2 Y588	64		CDK2 Y15	EPHB1 Y600	27		EFNB2 Y304	EGFR Y1092	47
SHC1 Y349	GPRC5A Y347	27		PIK3R2 Y464	EGFR Y1197	20		EGFR Y1197	PTPN11 Y62	55		FAM59A Y453	PTPRA Y798	64		EPHA2 Y575	PTK2 Y397	27		CDK2 Y15	EGFR Y1197	47
RIN1 Y36	GPRC5A Y347	27		PIK3R2 Y464	AFAP1L2 Y413	20		CTNND1 Y228	SKT Y393	55		PXN Y118	SKT Y393	64		EGFR Y1197	MAPK1 T185 Y187	27		CDK2 Y15	BCAR1 Y234	47
PTPRA Y798	BCAR1 Y249	27		PIK3R2 Y464	SGK223 Y413	20		CTNND1 Y228	FYN Y420	55		ANXA2 Y24	CAV1 Y14	64		FAM59A Y453	SHB Y268	27		SH2D3A Y231 S218	AFAP1L2 Y413	47
PRPF4B Y849	EPHB1 Y600	27		EGFR Y1197	ENO1 Y44	20		RIN1 Y36	EPHA2 Y588	55		MAPK1 Y187	INPPL1 Y986	64		ANXA2 Y30	PTRF Y308	27		SH2D3A Y231 S218	PTK2 Y576	47
PRPF4B Y849	EPHA2 Y588	27		EGFR Y1197	ACP1 Y132	20		ANXA2 Y24	ALB Y164	55		EGFR Y1172	MAPK1 T185 Y187	64		ENO1 Y44	LDLR Y845	27		GIT1 Y545	SKT Y393	47
PKP3 Y176	SHB Y268	27		EGFR Y1197	ALB Y164	20		TNK2 Y859	PKP3 Y176	55		SHC1 Y427	LDLR Y845	64		SKT Y393	SGK223 Y413	27		EGFR Y1197	AFAP1L2 Y413	47
PIK3R2 Y464	ANXA2 Y24	27		CTNND1 Y228	GSK3B Y216	20		INSR Y1185	ACP1 Y132	55		SHC1 Y427	PTPN11 Y62	64		STAT3 Y705	ERBB2IP Y1104	27		EGFR Y1197	SKT Y393	47
MAPK14 Y182	DYRK1A Y321	27		PTPRA Y798	SGK223 Y413	20		SHC1 Y349	EPHA2 Y588	55		EPHA2 Y588 Y594	PTRF Y308	64		DYRK1A Y321	EPHA2 Y588	27		EGFR Y1197	FYN Y420	47
INSR Y1189	SHB Y268	27		PXN Y118	ANXA2 Y238	20		STAT3 Y704	GPRC5A Y347	54		EPHA2 Y588 Y594	LDLR Y845	64		FYN Y420	SHB Y268	27		EGFR Y1197	LDLR Y845	47
GPRC5A Y347	ERBB2IP Y1104	27		EGFR Y1172	ENO1 Y44	20		STAT3 Y704	PKP3 Y176	54		ATA2 Y20	PXN Y118	63		ATA2 Y20	ITGB4 Y1207	26		FAM59A Y453	ITGB4 Y1207	47
FAM59A Y453	GSK3B Y216	27		ANXA2 Y30	INSR Y1185	20		TFRC Y20	LDLR Y845	54		STAT3 Y704	LDLR Y845	63		INSR Y1189	LDLR Y845	26		PXN Y118	AFAP1L2 Y413	47
ERBB2 Y1248	CRKL Y132	27		INPPL1 Y986	PTRF Y308	20		CDK2 Y15	BCAR1 Y234	54		ERBB2 Y1248	PRPF4B Y849	63		PXN S84 Y88	PKP3 Y176	26		AFAP1L2 Y413	ANXA2 Y30	47
EPHA2 Y575	BCAR1 Y249	27		EPHA2 Y772	SHB Y268	20		CTNND1 Y228	PTPRA Y798	54		BCAR1 Y327	ANXA2 Y30	63		PIK3R2 Y464	PTK2 Y576	26		ANXA2 Y24	DSC3 Y818	47
EFNB2 Y304	ANXA2 Y24	27		ENO1 Y44	TNK2 Y859	20		ANXA2 Y24	BCAR1 Y387	54		CRKL Y132	PTK2 Y397	63		CRKL Y132	RIN1 Y36	26		MAPK1 Y187	ITGB4 Y1207	47
CRKL Y132	EPHA2 Y575	27		DSC3 Y818	EPHA2 Y588	20		ANXA2 Y24	STAT3 Y705	54		CDK2 Y15	EPHA2 Y588 Y594	63		CRKL Y132	SHC1 Y427	26		MAPK1 T185 Y187	INPPL1 Y986	47
CDK2 Y15	MAPK1 Y187	27		INSR Y1185	PKP3 Y176	20		ANXA2 Y24	FYN Y420	54		GIT1 Y545	DYRK1A Y321	63		SHC1 Y349 Y350	SHB Y268	26		BCAR1 Y387	GSK3B Y216	47
CDK2 Y15	MAPK3 Y204	27		ATA2 Y20	ACP1 Y132	19		EGFR Y1172	EPHA2 Y588	54		RIN1 Y36	STAT3 Y705	63		EFNB2 Y304	ITGB4 Y1207	26		BCAR1 Y387	PTPN11 Y62	47
CDK2 Y15	ANXA2 Y238	27		INSR Y1189	DSC3 Y818	19		SHC1 Y427	EPHA2 Y588	54		MAPK1 T185 Y187	BCAR1 Y387	63		CDK2 Y15	MAPK1 T185 Y187	26		MAPK14 Y182	SHB Y268	47
BCAR1 Y327	EPHA2 Y772	27		PXN S84 Y88	PTK2 Y576	19		ANXA2 Y30	PTK2 Y397	54		SHC1 Y427	DSC3 Y818	63		SH2D3A Y231 S218	PTPRA Y798	26		MAPK14 Y182	PTK2 Y576	47
ATA2 Y20	PXN S84 Y88	27		SHC1 Y349 Y350	EPHA2 Y588	19		INPPL1 Y986	SHB Y268	54		INPPL1 Y986	MAPK3 Y204	63		FAM59A Y453	SKT Y393	26		MAPK3 Y204	PTK2 Y576	47
TNK2 Y859	ACP1 Y132	26		CDK2 Y15	LDLR Y845	19		ITGB4 Y1207	EPHA2 Y588 Y594	54		INPPL1 Y986	DYRK1A Y321	63		CTNND1 Y228	EPHA2 Y588 Y594	26		ACP1 Y132	EGFR Y1092	47
SH2D3A Y231 S218	SHC1 Y349	26		CDK2 Y15	MPZL1 Y263	19		PTRF Y308	ALB Y164	54		INPPL1 Y986	PKP3 Y176	63		PXN Y118	SHC1 Y427	26		BCAR1 Y327	GIT1 Y545	46
RIN1 Y36	LDLR Y845	26		EPHA2 Y575	CTNND1 Y228	19		SHB Y268	EGFR Y1092	54		PRPF4B Y849	PTK2 Y576	63		ANXA2 Y24	DYRK1A Y321	26		SHC1 Y349 Y350	PTPRA Y798	46
PXN S84 Y88	CAV1 Y14	26		EGFR Y1197	EPHA2 Y588 Y594	19		INSR Y1189	SGK223 Y413	53		PTRF Y308	STAT3 Y705	63		EGFR Y1172	FYN Y420	26		EFNB2 Y304	BCAR1 Y234	46
MAPK3 Y204	GSK3B Y216	26		EGFR Y1197	PTRF Y308	19		STAT3 Y704	PTRF Y308	53		STAT3 Y704	ANXA2 Y238	62		ANXA2 Y30	PTPN11 Y62	26		EGFR Y1197	ANXA2 Y238	46
MAPK1 Y187	GSK3B Y216	26		EGFR Y1197	ANXA2 Y238	19		SHC1 Y349 Y350	PTPN11 Y62	53		BCAR1 Y327	PXN Y118	62		ITGB4 Y1207	EPHB1 Y600	26		BCAR1 Y234	GSK3B Y216	46
MAPK1 T185 Y187	EPHA2 Y772	26		FAM59A Y453	EPHA2 Y772	19		GIT1 Y545	PTRF Y308	53		PIK3R2 Y464	BCAR1 Y387	62		ITGB4 Y1207	PKP3 Y176	26		AFAP1L2 Y413	MAPK3 Y204	46
INSR Y1185	BCAR1 Y249	26		FAM59A Y453	EPHB1 Y600	19		EGFR Y1197	EPHA2 Y588	53		PIK3R2 Y464	BCAR1 Y249	62		ITGB4 Y1207	BCAR1 Y249	26		RIN1 Y36	BCAR1 Y387	46
INPPL1 Y986	SKT Y393	26		RIN1 Y36	GSK3B Y216	19		MAPK1 Y187	EPHA2 Y588	53		TFRC Y20	RIN1 Y36	62		DSC3 Y818	SGK223 Y413	26		MAPK1 Y187	DYRK1A Y321	46
INPPL1 Y986	ERBB2IP Y1104	26		ANXA2 Y24	EPHA2 Y588	19		BCAR3 Y266	GPRC5A Y347	53		EFNB2 Y304	LDLR Y845	62		DSC3 Y818	ERBB2IP Y1104	26		EGFR Y1172	GPRC5A Y347	46
ERBB2 Y1248	GPRC5A Y347	26		ANXA2 Y24	ACP1 Y132	19		TNK2 Y859	GPRC5A Y347	53		EGFR Y1197	RIN1 Y36	62		PRPF4B Y849	ACP1 Y132	26		BCAR3 Y266	EPHA2 Y588 Y594	46
ERBB2 Y1248	ALB Y164	26		SHC1 Y427	EPHA2 Y588	19		PRPF4B Y849	INSR Y1185	53		PXN Y118	EPHA2 Y772	62		PRPF4B Y849	BCAR1 Y249	26		ENO1 Y44	EPHA2 Y588	46
EPHA2 Y588 Y594	ALB Y164	26		ANXA2 Y30	PTRF Y308	19		PRPF4B Y849	PKP3 Y176	53		RIN1 Y36	PTPN11 Y62	62		BCAR1 Y387	PTRF Y308	26		CAV1 Y14	ANXA2 Y238	46
EPHA2 Y575	FYN Y420	26		TNK2 Y859	PTRF Y308	19		PTRF Y308	FYN Y420	53		MAPK1 T185 Y187	SHB Y268	62		GRLF1 Y1105	SHB Y268	26		EPHA2 Y588 Y594	EGFR Y1092	46
ENO1 Y44	EPHA2 Y588	26		CAV1 Y14	PTRF Y308	19		GSK3B Y216	EPHA2 Y588	53		SHC1 Y427	ACP1 Y132	62		GRLF1 Y1105	ALB Y164	26		INSR Y1185	PTK2 Y576	46
ENO1 Y44	PTPN11 Y62	26		CAV1 Y14	ACP1 Y132	19		STAT3 Y705	PKP3 Y176	53		INPPL1 Y986	SHB Y268	62		INSR Y1185	LDLR Y845	26		EPHA2 Y588	BCAR1 Y249	46
EGFR Y1197	SKT Y393	26		SGK223 Y413	GPRC5A Y347	19		ERBB2 Y1248	ANXA2 Y30	52		EPHA2 Y772	EPHB1 Y600	62		GSK3B Y216	ACP1 Y132	26		ATA2 Y20	BCAR1 Y234	45
EGFR Y1197	ERBB2IP Y1104	26		EPHA2 Y588 Y594	DYRK1A Y321	19		BCAR1 Y327	PTK2 Y397	52		ENO1 Y44	SHC1 Y349	62		PXN S84 Y88	PTPRA Y798	25		STAT3 Y704	EGFR Y1172	45
EGFR Y1172	SKT Y393	26		PTRF Y308	PKP3 Y176	19		TFRC Y20	MPZL1 Y263	52		ITGB4 Y1207	BCAR1 Y387	62		PIK3R2 Y464	DSC3 Y818	25		CRKL Y132	FYN Y420	45
EGFR Y1172	ERBB2IP Y1104	26		PTRF Y308	EGFR Y1092	19		BCAR3 Y266	PKP3 Y176	52		ITGB4 Y1207	BCAR1 Y249	62		CDK2 Y15	EPHA2 Y575	25		SHC1 Y349 Y350	BCAR1 Y234	45
EFNB2 Y304	RIN1 Y36	26		DYRK1A Y321	GPRC5A Y347	19		MAPK1 T185 Y187	TNK2 Y859	52		TNK2 Y859	INSR Y1185	62		CDK2 Y15	SKT Y393	25		CDK2 Y15	BCAR1 Y387	45
DYRK1A Y321	PKP3 Y176	26		DYRK1A Y321	LDLR Y845	19		MAPK1 T185 Y187	STAT3 Y705	52		SGK223 Y413	SHB Y268	62		SH2D3A Y231 S218	SKT Y393	25		BCAR1 Y234	PTK2 Y576	45
DSC3 Y818	DYRK1A Y321	26		ATA2 Y20	ENO1 Y44	18		TNK2 Y859	INSR Y1185	52		BCAR1 Y387	ANXA2 Y238	62		EPHA2 Y575	GIT1 Y545	25		FAM59A Y453	ALB Y164	45
DSC3 Y818	GPRC5A Y347	26		ATA2 Y20	EPHB1 Y600	18		MAPK14 Y182	ALB Y164	52		INSR Y1185	EPHA2 Y588	62		EPHA2 Y575	MAPK1 T185 Y187	25		AFAP1L2 Y413	BCAR1 Y249	45
CTNND1 Y228	PXN Y118	26		INSR Y1189	SHB Y268	18		PTRF Y308	STAT3 Y705	52		MAPK14 Y182	PTK2 Y576	62		PXN Y118	ERBB2IP Y1104	25		BCAR3 Y266	LDLR Y845	45
CDK2 Y15	MAPK1 T185 Y187	26		TFRC Y20	INSR Y1185	18		STAT3 Y705	GPRC5A Y347	52		EPHB1 Y600	PTRF Y308	62		BCAR3 Y266	PRPF4B Y849	25		BCAR3 Y266	MPZL1 Y263	45
CDK2 Y15	LDLR Y845	26		TFRC Y20	EPHB1 Y600	18		ATA2 Y20	PTPN11 Y62	51		SHB Y268	EGFR Y1092	62		SHC1 Y427	FYN Y420	25		SHC1 Y427	GPRC5A Y347	45
BCAR1 Y327	AFAP1L2 Y413	26		SHC1 Y349 Y350	PTPN11 Y62	18		INSR Y1189	PXN S84 Y88	51		BCAR1 Y249	ANXA2 Y238	62		ANXA2 Y30	DSC3 Y818	25		CAV1 Y14	LDLR Y845	45
ANXA2 Y30	DYRK1A Y321	26		SH2D3A Y231 S218	GIT1 Y545	18		INSR Y1189	FYN Y420	51		STAT3 Y704	TFRC Y20	61		GRLF1 Y1105	DYRK1A Y321	25		PRPF4B Y849	PTK2 Y576	45
TFRC Y20	GSK3B Y216	25		SH2D3A Y231 S218	AFAP1L2 Y413	18		STAT3 Y704	INSR Y1185	51		PIK3R2 Y464	EPHB1 Y600	61		GPRC5A Y347	ANXA2 Y238	25		BCAR1 Y387	DYRK1A Y321	45
STAT3 Y705	ACP1 Y132	25		SH2D3A Y231 S218	SGK223 Y413	18		BCAR1 Y327	RIN1 Y36	51		TFRC Y20	AFAP1L2 Y413	61		ATA2 Y20	PXN S84 Y88	24		GRLF1 Y1105	ERBB2IP Y1104	45
STAT3 Y704	ACP1 Y132	25		EPHA2 Y575	SKT Y393	18		CRKL Y132	GIT1 Y545	51		FAM59A Y453	SGK223 Y413	61		INSR Y1189	EFNB2 Y304	24		MPZL1 Y263	BCAR1 Y249	45
SKT Y393	EGFR Y1092	25		PTPRA Y798	ALB Y164	18		CRKL Y132	FYN Y420	51		FAM59A Y453	SHB Y268	61		INSR Y1189	PTPRA Y798	24		INSR Y1189	ERBB2 Y1248	44
SHC1 Y349 Y350	EPHB1 Y600	25		ANXA2 Y24	ENO1 Y44	18		CDK2 Y15	PTK2 Y397	51		PXN Y118	PRPF4B Y849	61		STAT3 Y704	FAM59A Y453	24		ERBB2 Y1248	INPPL1 Y986	44
SHC1 Y349	EPHA2 Y588	25		EGFR Y1172	EPHA2 Y588	18		GIT1 Y545	FYN Y420	51		AFAP1L2 Y413	LDLR Y845	61		ERBB2 Y1248	GPRC5A Y347	24		ERBB2 Y1248	ERBB2IP Y1104	44
RIN1 Y36	SHB Y268	25		EGFR Y1172	PTPN11 Y62	18		ANXA2 Y30	GRLF1 Y1105	51		RIN1 Y36	MPZL1 Y263	61		BCAR1 Y327	SH2D3A Y231 S218	24		BCAR1 Y327	PRPF4B Y849	44
PKP3 Y176	PTPN11 Y62	25		SHC1 Y427	GSK3B Y216	18		SKT Y393	MPZL1 Y263	51		ANXA2 Y30	MAPK14 Y182	61		BCAR1 Y327	SGK223 Y413	24		PIK3R2 Y464	CRKL Y132	44
PIK3R2 Y464	DSC3 Y818	25		ANXA2 Y30	EPHB1 Y600	18		FYN Y420	MPZL1 Y263	51		INPPL1 Y986	EPHA2 Y588	61		CRKL Y132	EPHB1 Y600	24		TFRC Y20	ANXA2 Y30	44
GSK3B Y216	ANXA2 Y238	25		ANXA2 Y30	ACP1 Y132	18		ATA2 Y20	MAPK14 Y182	50		SGK223 Y413	SHC1 Y349	61		SHC1 Y349 Y350	GIT1 Y545	24		SHC1 Y349 Y350	DYRK1A Y321	44
ERBB2IP Y1104	EGFR Y1092	25		INPPL1 Y986	PTPN11 Y62	18		INSR Y1189	CDK2 Y15	50		SHC1 Y349	PKP3 Y176	61		EFNB2 Y304	PXN Y118	24		EFNB2 Y304	INPPL1 Y986	44
ERBB2IP Y1104	PTK2 Y576	25		ENO1 Y44	CAV1 Y14	18		INSR Y1189	MAPK14 Y182	50		STAT3 Y705	ANXA2 Y238	61		EFNB2 Y304	INSR Y1185	24		EFNB2 Y304	PKP3 Y176	44
EPHA2 Y575	PTRF Y308	25		ENO1 Y44	EGFR Y1092	18		PXN S84 Y88	PTK2 Y576	50		STAT3 Y704	ANXA2 Y24	60		EFNB2 Y304	MPZL1 Y263	24		EPHA2 Y575	GIT1 Y545	44
EGFR Y1197	MAPK14 Y182	25		SKT Y393	GSK3B Y216	18		TFRC Y20	DYRK1A Y321	50		BCAR1 Y327	SH2D3A Y231 S218	60		CDK2 Y15	MAPK14 Y182	24		FAM59A Y453	ANXA2 Y238	44
DSC3 Y818	PTPN11 Y62	25		PKP3 Y176	PTPN11 Y62	18		TFRC Y20	PKP3 Y176	50		PIK3R2 Y464	SHC1 Y427	60		SH2D3A Y231 S218	EPHB1 Y600	24		RIN1 Y36	TNK2 Y859	44
BCAR1 Y327	CDK2 Y15	25		ACP1 Y132	EGFR Y1092	18		SH2D3A Y231 S218	ANXA2 Y30	50		SH2D3A Y231 S218	ANXA2 Y24	60		GIT1 Y545	MPZL1 Y263	24		RIN1 Y36	ALB Y164	44
ATA2 Y20	SKT Y393	25		ALB Y164	EGFR Y1092	18		CTNND1 Y228	TNK2 Y859	50		BCAR1 Y234	ANXA2 Y30	60		FAM59A Y453	STAT3 Y705	24		ANXA2 Y24	LDLR Y845	44
ANXA2 Y24	LDLR Y845	25		ATA2 Y20	EPHA2 Y588	17		INPPL1 Y986	EPHA2 Y588	50		BCAR1 Y234	SHB Y268	60		CTNND1 Y228	AFAP1L2 Y413	24		EGFR Y1172	MAPK3 Y204	44
TNK2 Y859	SKT Y393	24		ATA2 Y20	PTPN11 Y62	17		ITGB4 Y1207	MAPK3 Y204	50		FAM59A Y453	DYRK1A Y321	60		PTPRA Y798	INSR Y1185	24		BCAR3 Y266	ACP1 Y132	44
MAPK1 T185 Y187	PTK2 Y576	24		INSR Y1189	STAT3 Y705	17		SKT Y393	GPRC5A Y347	50		PTPRA Y798	FYN Y420	60		PXN Y118	EPHB1 Y600	24		BCAR3 Y266	ANXA2 Y238	44
INSR Y1189	BCAR1 Y249	24		STAT3 Y704	SH2D3A Y231 S218	17		CAV1 Y14	MAPK14 Y182	50		PTPRA Y798	GPRC5A Y347	60		PXN Y118	BCAR1 Y249	24		ANXA2 Y30	PTRF Y308	44
GSK3B Y216	PTPN11 Y62	24		TFRC Y20	PRPF4B Y849	17		PRPF4B Y849	MPZL1 Y263	50		AFAP1L2 Y413	ACP1 Y132	60		BCAR3 Y266	SGK223 Y413	24		PRPF4B Y849	PTK2 Y397	44
GIT1 Y545	ANXA2 Y238	24		SHC1 Y349 Y350	GSK3B Y216	17		BCAR1 Y387	INSR Y1185	50		AFAP1L2 Y413	PTPN11 Y62	60		BCAR3 Y266	EPHA2 Y588 Y594	24		SHC1 Y349	ANXA2 Y238	44
EPHB1 Y600	SHC1 Y349	24		CDK2 Y15	FYN Y420	17		EPHA2 Y588 Y594	LDLR Y845	50		RIN1 Y36	DSC3 Y818	60		MAPK1 T185 Y187	PRPF4B Y849	24		LDLR Y845	PTK2 Y397	44
EPHA2 Y575	ANXA2 Y30	24		GIT1 Y545	PTPRA Y798	17		INSR Y1185	STAT3 Y705	50		ANXA2 Y24	BCAR1 Y387	60		EPHA2 Y772	PTRF Y308	24		BCAR1 Y327	GSK3B Y216	43
CTNND1 Y228	GSK3B Y216	24		FAM59A Y453	GPRC5A Y347	17		EPHB1 Y600	GPRC5A Y347	50		ANXA2 Y24	STAT3 Y705	60		SKT Y393	GSK3B Y216	24		BCAR1 Y327	PTPN11 Y62	43
BCAR3 Y266	INSR Y1185	24		PTPRA Y798	AFAP1L2 Y413	17		EPHA2 Y588	EGFR Y1092	50		MAPK1 T185 Y187	INPPL1 Y986	60		SGK223 Y413	ACP1 Y132	24		PIK3R2 Y464	CTNND1 Y228	43
BCAR1 Y387	INSR Y1185	24		ANXA2 Y24	INSR Y1185	17		STAT3 Y704	CTNND1 Y228	49		STAT3 Y705	LDLR Y845	60		INSR Y1189	EPHB1 Y600	23		CRKL Y132	BCAR3 Y266	43
BCAR1 Y327	DYRK1A Y321	24		SHC1 Y427	PTPN11 Y62	17		ERBB2 Y1248	GSK3B Y216	49		FYN Y420	PTK2 Y397	60		INSR Y1189	SHB Y268	23		CRKL Y132	BCAR1 Y249	43
AFAP1L2 Y413	MAPK1 Y187	24		ANXA2 Y30	ENO1 Y44	17		EPHA2 Y575	CTNND1 Y228	49		PXN S84 Y88	SGK223 Y413	59		PXN S84 Y88	ANXA2 Y24	23		EGFR Y1197	RIN1 Y36	43
AFAP1L2 Y413	MAPK3 Y204	24		ANXA2 Y30	PTPN11 Y62	17		CTNND1 Y228	STAT3 Y705	49		STAT3 Y704	PIK3R2 Y464	59		ERBB2 Y1248	CRKL Y132	23		EGFR Y1197	EPHA2 Y588	43
SHC1 Y349 Y350	PTPN11 Y62	23		INPPL1 Y986	ENO1 Y44	17		SKT Y393	INSR Y1185	49		STAT3 Y704	RIN1 Y36	59		PIK3R2 Y464	DYRK1A Y321	23		BCAR1 Y234	RIN1 Y36	43
RIN1 Y36	PTPN11 Y62	23		INPPL1 Y986	EPHA2 Y588	17		BCAR1 Y387	MPZL1 Y263	49		TFRC Y20	SHC1 Y427	59		PIK3R2 Y464	ANXA2 Y238	23		MAPK1 Y187	GSK3B Y216	43
PXN S84 Y88	TNK2 Y859	23		INPPL1 Y986	ACP1 Y132	17		MAPK14 Y182	EPHA2 Y588	49		EFNB2 Y304	ACP1 Y132	59		TFRC Y20	GPRC5A Y347	23		EGFR Y1172	STAT3 Y705	43
PIK3R2 Y464	SHC1 Y427	23		INPPL1 Y986	ALB Y164	17		EPHB1 Y600	MPZL1 Y263	49		EFNB2 Y304	SHB Y268	59		CRKL Y132	CAV1 Y14	23		ANXA2 Y30	ENO1 Y44	43
MAPK14 Y182	ERBB2IP Y1104	23		TNK2 Y859	PTPN11 Y62	17		MPZL1 Y263	ALB Y164	49		GIT1 Y545	ERBB2IP Y1104	59		SHC1 Y349 Y350	EPHA2 Y588 Y594	23		ANXA2 Y30	GPRC5A Y347	43
MAPK14 Y182	EGFR Y1092	23		DSC3 Y818	INSR Y1185	17		BCAR1 Y327	SHB Y268	48		FAM59A Y453	STAT3 Y705	59		CDK2 Y15	GRLF1 Y1105	23		PRPF4B Y849	BCAR1 Y249	43
MAPK14 Y182	ANXA2 Y238	23		DSC3 Y818	ACP1 Y132	17		CDK2 Y15	SH2D3A Y231 S218	48		PXN Y118	EPHA2 Y588	59		CDK2 Y15	ANXA2 Y238	23		MAPK14 Y182	PTK2 Y397	43
MAPK1 Y187	ITGB4 Y1207	23		CAV1 Y14	PTPN11 Y62	17		BCAR1 Y234	PKP3 Y176	48		AFAP1L2 Y413	DSC3 Y818	59		EPHA2 Y575	PTPRA Y798	23		SHC1 Y349	LDLR Y845	43
ITGB4 Y1207	MAPK3 Y204	23		GRLF1 Y1105	INSR Y1185	17		TNK2 Y859	MPZL1 Y263	48		AFAP1L2 Y413	FYN Y420	59		GIT1 Y545	CTNND1 Y228	23		STAT3 Y704	CDK2 Y15	42
INPPL1 Y986	MAPK14 Y182	23		GRLF1 Y1105	GSK3B Y216	17		INSR Y1185	EPHB1 Y600	48		BCAR3 Y266	SHC1 Y349	59		GIT1 Y545	SHC1 Y349	23		STAT3 Y704	EGFR Y1197	42
GSK3B Y216	LDLR Y845	23		GRLF1 Y1105	ACP1 Y132	17		ATA2 Y20	ACP1 Y132	47		EPHA2 Y772	SHB Y268	59		GIT1 Y545	GPRC5A Y347	23		BCAR1 Y327	AFAP1L2 Y413	42
FAM59A Y453	ALB Y164	23		SHC1 Y349	GSK3B Y216	17		STAT3 Y704	MPZL1 Y263	47		EPHA2 Y772	PTK2 Y576	59		EGFR Y1197	ALB Y164	23		BCAR1 Y327	DYRK1A Y321	42
ERBB2 Y1248	CDK2 Y15	23		DYRK1A Y321	PTPN11 Y62	17		EPHA2 Y575	SHB Y268	47		DSC3 Y818	PTK2 Y576	59		CTNND1 Y228	PRPF4B Y849	23		EFNB2 Y304	BCAR3 Y266	42
EPHA2 Y772	BCAR1 Y387	23		GPRC5A Y347	SHB Y268	17		AFAP1L2 Y413	ANXA2 Y30	47		INSR Y1185	MAPK14 Y182	59		PTPRA Y798	PKP3 Y176	23		CDK2 Y15	FAM59A Y453	42
EGFR Y1172	MAPK14 Y182	23		GPRC5A Y347	ALB Y164	17		MAPK1 Y187	SGK223 Y413	47		INSR Y1189	EPHA2 Y772	58		PXN Y118	MAPK14 Y182	23		CDK2 Y15	EPHA2 Y772	42
EGFR Y1172	ACP1 Y132	23		EGFR Y1092	PTPN11 Y62	17		MAPK1 Y187	GRLF1 Y1105	47		PXN S84 Y88	SKT Y393	58		AFAP1L2 Y413	SKT Y393	23		CDK2 Y15	STAT3 Y705	42
CDK2 Y15	CTNND1 Y228	23		ATA2 Y20	GSK3B Y216	16		BCAR3 Y266	ANXA2 Y30	47		STAT3 Y704	FAM59A Y453	58		MAPK1 Y187	FYN Y420	23		EPHA2 Y575	FYN Y420	42
BCAR3 Y266	EPHA2 Y772	23		ERBB2 Y1248	PRPF4B Y849	16		BCAR3 Y266	INSR Y1185	47		STAT3 Y704	ITGB4 Y1207	58		EGFR Y1172	MAPK1 T185 Y187	23		GIT1 Y545	BCAR1 Y387	42
BCAR3 Y266	SGK223 Y413	23		ERBB2 Y1248	DYRK1A Y321	16		INPPL1 Y986	LDLR Y845	47		STAT3 Y704	GSK3B Y216	58		SHC1 Y427	LDLR Y845	23		MAPK1 Y187	ACP1 Y132	42
BCAR1 Y327	SGK223 Y413	23		TFRC Y20	PTPRA Y798	16		EPHA2 Y772	GRLF1 Y1105	47		PIK3R2 Y464	ANXA2 Y24	58		SHC1 Y427	ALB Y164	23		EGFR Y1172	INSR Y1185	42
ATA2 Y20	MAPK1 Y187	23		EPHA2 Y575	STAT3 Y705	16		ITGB4 Y1207	BCAR1 Y249	47		TFRC Y20	STAT3 Y705	58		PRPF4B Y849	SHC1 Y349	23		BCAR3 Y266	SGK223 Y413	42
ATA2 Y20	MAPK3 Y204	23		GIT1 Y545	GPRC5A Y347	16		CAV1 Y14	FYN Y420	47		SHC1 Y349 Y350	BCAR1 Y234	58		EPHA2 Y588 Y594	GPRC5A Y347	23		BCAR3 Y266	GPRC5A Y347	42
AFAP1L2 Y413	BCAR1 Y387	23		GIT1 Y545	ANXA2 Y238	16		SGK223 Y413	MPZL1 Y263	47		EFNB2 Y304	GIT1 Y545	58		EPHA2 Y588 Y594	PTK2 Y576	23		SHC1 Y427	ERBB2IP Y1104	42
ACP1 Y132	EGFR Y1092	23		EGFR Y1197	PTPN11 Y62	16		MAPK14 Y182	DYRK1A Y321	47		EFNB2 Y304	PTK2 Y576	58		INSR Y1185	EPHB1 Y600	23		INPPL1 Y986	EPHA2 Y588 Y594	42
SHC1 Y349 Y350	GPRC5A Y347	22		FAM59A Y453	INSR Y1185	16		STAT3 Y705	MPZL1 Y263	47		AFAP1L2 Y413	GRLF1 Y1105	58		INSR Y1185	SHB Y268	23		SKT Y393	SGK223 Y413	42
SH2D3A Y231 S218	EPHB1 Y600	22		CTNND1 Y228	EPHB1 Y600	16		GPRC5A Y347	ERBB2IP Y1104	47		RIN1 Y36	LDLR Y845	58		MAPK14 Y182	FYN Y420	23		SKT Y393	ACP1 Y132	42
MAPK14 Y182	GSK3B Y216	22		AFAP1L2 Y413	GPRC5A Y347	16		LDLR Y845	EGFR Y1092	47		RIN1 Y36	ACP1 Y132	58		MAPK14 Y182	MPZL1 Y263	23		SGK223 Y413	BCAR1 Y249	42
MAPK14 Y182	SHB Y268	22		AFAP1L2 Y413	ANXA2 Y238	16		PXN S84 Y88	CDK2 Y15	46		SHC1 Y427	ITGB4 Y1207	58		GPRC5A Y347	PTK2 Y576	23		INSR Y1185	EGFR Y1092	42
INSR Y1189	BCAR3 Y266	22		RIN1 Y36	INSR Y1185	16		BCAR1 Y327	EPHA2 Y575	46		PRPF4B Y849	BCAR1 Y249	58		MPZL1 Y263	SHB Y268	23		PKP3 Y176	PTK2 Y576	42
INSR Y1189	BCAR1 Y387	22		ANXA2 Y24	GSK3B Y216	16		PIK3R2 Y464	ANXA2 Y30	46		EPHA2 Y588 Y594	FYN Y420	58		MPZL1 Y263	PTK2 Y576	23		ACP1 Y132	BCAR1 Y249	42
INPPL1 Y986	ACP1 Y132	22		ANXA2 Y30	EPHA2 Y588	16		GIT1 Y545	SKT Y393	46		EPHB1 Y600	GSK3B Y216	58		INSR Y1189	SKT Y393	22		PTK2 Y397	ANXA2 Y238	42
GSK3B Y216	ERBB2IP Y1104	22		EPHA2 Y772	STAT3 Y705	16		BCAR1 Y234	GPRC5A Y347	46		EPHB1 Y600	SHB Y268	58		BCAR1 Y327	GIT1 Y545	22		ATA2 Y20	INSR Y1185	41
GIT1 Y545	PTPN11 Y62	22		ENO1 Y44	DSC3 Y818	16		AFAP1L2 Y413	FYN Y420	46		SHC1 Y349	MAPK3 Y204	58		PIK3R2 Y464	CDK2 Y15	22		STAT3 Y704	INPPL1 Y986	41
FAM59A Y453	PRPF4B Y849	22		ENO1 Y44	GRLF1 Y1105	16		ANXA2 Y24	BCAR3 Y266	46		CRKL Y132	EPHA2 Y588 Y594	57		TFRC Y20	ITGB4 Y1207	22		ERBB2 Y1248	GRLF1 Y1105	41
EPHA2 Y588	PKP3 Y176	22		ENO1 Y44	PKP3 Y176	16		ANXA2 Y24	SKT Y393	46		CTNND1 Y228	AFAP1L2 Y413	57		CRKL Y132	EGFR Y1197	22		ERBB2 Y1248	LDLR Y845	41
ENO1 Y44	EPHA2 Y588 Y594	22		TNK2 Y859	EPHA2 Y588	16		ANXA2 Y24	EPHB1 Y600	46		MAPK1 Y187	SHC1 Y349	57		CRKL Y132	BCAR3 Y266	22		BCAR1 Y327	CDK2 Y15	41
DSC3 Y818	SHB Y268	22		DSC3 Y818	GSK3B Y216	16		MAPK1 Y187	LDLR Y845	46		MAPK1 T185 Y187	SHC1 Y349	57		CRKL Y132	INPPL1 Y986	22		EFNB2 Y304	ALB Y164	41
DSC3 Y818	ALB Y164	22		CAV1 Y14	EPHA2 Y588	16		ANXA2 Y30	DSC3 Y818	46		SHC1 Y427	ANXA2 Y238	57		CRKL Y132	EGFR Y1092	22		FAM59A Y453	INPPL1 Y986	41
BCAR1 Y234	INSR Y1185	22		SGK223 Y413	ANXA2 Y238	16		TNK2 Y859	DYRK1A Y321	46		DSC3 Y818	SHC1 Y349	57		SHC1 Y349 Y350	PTK2 Y397	22		FAM59A Y453	GRLF1 Y1105	41
ANXA2 Y24	PTPN11 Y62	22		PRPF4B Y849	SHB Y268	16		MAPK14 Y182	PKP3 Y176	46		CAV1 Y14	EPHA2 Y588 Y594	57		SHC1 Y349 Y350	ALB Y164	22		PXN Y118	SHC1 Y349	41
SHC1 Y349 Y350	SH2D3A Y231 S218	21		MAPK14 Y182	ERBB2IP Y1104	16		GPRC5A Y347	ACP1 Y132	46		PRPF4B Y849	BCAR1 Y387	57		EGFR Y1197	ITGB4 Y1207	22		RIN1 Y36	CAV1 Y14	41
SHC1 Y349 Y350	SHB Y268	21		EPHB1 Y600	STAT3 Y705	16		PTPN11 Y62	PTK2 Y576	46		EPHA2 Y588 Y594	EGFR Y1092	57		EGFR Y1197	ERBB2IP Y1104	22		ANXA2 Y24	EPHB1 Y600	41
SGK223 Y413	BCAR1 Y387	21		EPHB1 Y600	FYN Y420	16		CRKL Y132	EFNB2 Y304	45		SHC1 Y349	EPHA2 Y588	57		FAM59A Y453	MAPK14 Y182	22		MAPK1 Y187	PTK2 Y397	41
PXN Y118	PTPN11 Y62	21		EPHB1 Y600	SHB Y268	16		CRKL Y132	BCAR3 Y266	45		PXN S84 Y88	BCAR1 Y234	56		FAM59A Y453	ANXA2 Y238	22		MAPK1 Y187	ANXA2 Y238	41
PRPF4B Y849	MAPK3 Y204	21		GSK3B Y216	EGFR Y1092	16		CRKL Y132	SKT Y393	45		PIK3R2 Y464	STAT3 Y705	56		PTPRA Y798	EPHA2 Y588 Y594	22		INPPL1 Y986	SGK223 Y413	41
PIK3R2 Y464	ANXA2 Y30	21		EPHA2 Y588	PKP3 Y176	16		CRKL Y132	GSK3B Y216	45		TFRC Y20	BCAR1 Y387	56		AFAP1L2 Y413	MAPK14 Y182	22		INPPL1 Y986	MPZL1 Y263	41
MAPK1 Y187	PRPF4B Y849	21		EPHA2 Y588	ALB Y164	16		EPHA2 Y575	LDLR Y845	45		EFNB2 Y304	BCAR1 Y234	56		MAPK1 T185 Y187	DYRK1A Y321	22		ITGB4 Y1207	SHC1 Y349	41
MAPK1 T185 Y187	SGK223 Y413	21		EPHA2 Y588	EGFR Y1092	16		GIT1 Y545	ERBB2IP Y1104	45		EFNB2 Y304	CAV1 Y14	56		SHC1 Y427	ACP1 Y132	22		EPHB1 Y600	ALB Y164	41
INSR Y1189	CTNND1 Y228	21		PKP3 Y176	ACP1 Y132	16		EGFR Y1197	LDLR Y845	45		CDK2 Y15	STAT3 Y705	56		ANXA2 Y30	EPHA2 Y588	22		PTRF Y308	ERBB2IP Y1104	41
GIT1 Y545	EPHA2 Y588	21		INSR Y1189	STAT3 Y704	15		CTNND1 Y228	BCAR1 Y387	45		EPHA2 Y575	PTK2 Y397	56		ENO1 Y44	SKT Y393	22		DYRK1A Y321	ACP1 Y132	41
GIT1 Y545	ERBB2IP Y1104	21		PXN S84 Y88	ERBB2 Y1248	15		CTNND1 Y228	ALB Y164	45		GIT1 Y545	PTK2 Y576	56		SKT Y393	INSR Y1185	22		LDLR Y845	PTK2 Y576	41
ERBB2 Y1248	GIT1 Y545	21		TFRC Y20	CDK2 Y15	15		PTPRA Y798	MAPK14 Y182	45		EGFR Y1197	BCAR3 Y266	56		SKT Y393	DYRK1A Y321	22		BCAR1 Y249	PTPN11 Y62	41
EPHA2 Y772	MAPK14 Y182	21		TFRC Y20	MAPK3 Y204	15		EGFR Y1172	GRLF1 Y1105	45		ACP1 Y132	BCAR1 Y249	56		SKT Y393	ALB Y164	22		ERBB2IP Y1104	PTK2 Y576	41
EPHA2 Y575	ENO1 Y44	21		EGFR Y1197	EPHB1 Y600	15		SHC1 Y427	GRLF1 Y1105	45		MPZL1 Y263	ANXA2 Y238	56		EPHA2 Y588 Y594	SHC1 Y349	22		ATA2 Y20	BCAR3 Y266	40
CTNND1 Y228	PTK2 Y576	21		EGFR Y1197	GSK3B Y216	15		SHC1 Y427	PTPN11 Y62	45		INSR Y1189	ACP1 Y132	55		MAPK14 Y182	EPHA2 Y588	22		ATA2 Y20	BCAR1 Y249	40
CDK2 Y15	EPHA2 Y575	21		EGFR Y1197	EPHA2 Y588	15		ANXA2 Y30	ENO1 Y44	45		STAT3 Y704	CDK2 Y15	55		MAPK14 Y182	GPRC5A Y347	22		ERBB2 Y1248	GSK3B Y216	40
CDK2 Y15	EPHA2 Y588 Y594	21		FAM59A Y453	PRPF4B Y849	15		EPHA2 Y772	DYRK1A Y321	45		TFRC Y20	BCAR1 Y249	55		MAPK14 Y182	ALB Y164	22		CDK2 Y15	ANXA2 Y30	40
BCAR3 Y266	EPHB1 Y600	21		CTNND1 Y228	GPRC5A Y347	15		TNK2 Y859	SHB Y268	45		CRKL Y132	EPHB1 Y600	55		EPHB1 Y600	MPZL1 Y263	22		CDK2 Y15	BCAR1 Y249	40
TFRC Y20	PXN Y118	20		RIN1 Y36	GPRC5A Y347	15		SKT Y393	PTRF Y308	45		SHC1 Y349 Y350	SGK223 Y413	55		SHC1 Y349	GSK3B Y216	22		EPHA2 Y575	INPPL1 Y986	40
STAT3 Y704	SKT Y393	20		MAPK1 Y187	PTK2 Y576	15		GRLF1 Y1105	SHC1 Y349	45		SHC1 Y349 Y350	PKP3 Y176	55		MAPK3 Y204	ALB Y164	22		EPHA2 Y575	EPHB1 Y600	40
STAT3 Y704	MAPK14 Y182	20		EGFR Y1172	GSK3B Y216	15		INSR Y1185	ERBB2IP Y1104	45		PTPRA Y798	MPZL1 Y263	55		INSR Y1189	ERBB2IP Y1104	21		GIT1 Y545	PKP3 Y176	40
SKT Y393	STAT3 Y705	20		EGFR Y1172	ALB Y164	15		MAPK14 Y182	SHB Y268	45		MAPK1 Y187	MPZL1 Y263	55		INSR Y1189	PTK2 Y576	21		GIT1 Y545	BCAR1 Y249	40
SHC1 Y349 Y350	EPHA2 Y588	20		ANXA2 Y30	GSK3B Y216	15		MAPK3 Y204	LDLR Y845	45		BCAR3 Y266	EPHA2 Y588 Y594	55		ERBB2 Y1248	EPHA2 Y588 Y594	21		EGFR Y1197	STAT3 Y705	40
RIN1 Y36	EPHB1 Y600	20		INPPL1 Y986	GSK3B Y216	15		PTRF Y308	GSK3B Y216	45		ENO1 Y44	FYN Y420	55		ERBB2 Y1248	LDLR Y845	21		FAM59A Y453	LDLR Y845	40
RIN1 Y36	EPHA2 Y588	20		TNK2 Y859	GSK3B Y216	15		MPZL1 Y263	ERBB2IP Y1104	45		ITGB4 Y1207	STAT3 Y705	55		ERBB2 Y1248	SHB Y268	21		CTNND1 Y228	SGK223 Y413	40
PXN S84 Y88	EGFR Y1172	20		SKT Y393	EPHB1 Y600	15		ATA2 Y20	CDK2 Y15	44		SKT Y393	PKP3 Y176	55		TFRC Y20	FAM59A Y453	21		AFAP1L2 Y413	EPHA2 Y588	40
PXN S84 Y88	INPPL1 Y986	20		CAV1 Y14	GSK3B Y216	15		INSR Y1189	PRPF4B Y849	44		BCAR1 Y387	LDLR Y845	55		TFRC Y20	DYRK1A Y321	21		RIN1 Y36	GRLF1 Y1105	40
PXN S84 Y88	EGFR Y1092	20		SGK223 Y413	EPHA2 Y588	15		INSR Y1189	BCAR1 Y387	44		BCAR1 Y387	ACP1 Y132	55		TFRC Y20	PTK2 Y576	21		MAPK1 Y187	GRLF1 Y1105	40
MAPK3 Y204	SHB Y268	20		INSR Y1185	SHB Y268	15		BCAR1 Y327	PTRF Y308	44		BCAR1 Y387	PTPN11 Y62	55		CRKL Y132	EFNB2 Y304	21		MAPK1 Y187	EPHB1 Y600	40
MAPK14 Y182	STAT3 Y705	20		GSK3B Y216	PKP3 Y176	15		PIK3R2 Y464	MAPK14 Y182	44		EPHA2 Y588 Y594	ACP1 Y132	55		CRKL Y132	EGFR Y1172	21		ANXA2 Y30	SHB Y268	40
MAPK14 Y182	PTPN11 Y62	20		GSK3B Y216	PTK2 Y576	15		TFRC Y20	CDK2 Y15	44		INSR Y1185	PKP3 Y176	55		SHC1 Y349 Y350	ENO1 Y44	21		EPHA2 Y772	ACP1 Y132	40
MAPK1 Y187	SHB Y268	20		SH2D3A Y231 S218	RIN1 Y36	14		CRKL Y132	EPHB1 Y600	44		EPHB1 Y600	LDLR Y845	55		SHC1 Y349 Y350	PRPF4B Y849	21		SKT Y393	PKP3 Y176	40
INSR Y1189	BCAR1 Y234	20		EPHA2 Y575	PXN Y118	14		CDK2 Y15	ACP1 Y132	44		GSK3B Y216	STAT3 Y705	55		CDK2 Y15	MPZL1 Y263	21		GSK3B Y216	BCAR1 Y249	40
GSK3B Y216	EPHA2 Y588	20		CTNND1 Y228	ITGB4 Y1207	14		GIT1 Y545	EPHB1 Y600	44		LDLR Y845	BCAR1 Y249	55		GIT1 Y545	FAM59A Y453	21		ERBB2 Y1248	PXN Y118	39
GIT1 Y545	LDLR Y845	20		RIN1 Y36	ITGB4 Y1207	14		GIT1 Y545	GPRC5A Y347	44		INSR Y1189	GIT1 Y545	54		GIT1 Y545	BCAR3 Y266	21		PIK3R2 Y464	EPHA2 Y575	39
ERBB2 Y1248	PRPF4B Y849	20		EGFR Y1172	EPHB1 Y600	14		BCAR1 Y234	INSR Y1185	44		BCAR1 Y327	MPZL1 Y263	54		BCAR1 Y234	PTRF Y308	21		CRKL Y132	PKP3 Y176	39
ERBB2 Y1248	PTK2 Y576	20		ENO1 Y44	PTK2 Y576	14		BCAR1 Y234	MPZL1 Y263	44		SHC1 Y349 Y350	MAPK3 Y204	54		CTNND1 Y228	GSK3B Y216	21		SHC1 Y349 Y350	SKT Y393	39
EPHA2 Y588 Y594	PTK2 Y576	20		DSC3 Y818	EPHB1 Y600	14		EGFR Y1172	LDLR Y845	44		BCAR1 Y234	MAPK1 Y187	54		PTPRA Y798	CAV1 Y14	21		EFNB2 Y304	BCAR1 Y249	39
ENO1 Y44	FYN Y420	20		SKT Y393	GPRC5A Y347	14		EGFR Y1172	PTPN11 Y62	44		AFAP1L2 Y413	SHC1 Y427	54		PXN Y118	MAPK1 Y187	21		GIT1 Y545	MAPK1 Y187	39
EFNB2 Y304	SHC1 Y427	20		INSR Y1185	STAT3 Y705	14		SHC1 Y427	LDLR Y845	44		MAPK1 Y187	GSK3B Y216	54		MAPK1 T185 Y187	ENO1 Y44	21		EGFR Y1197	PTK2 Y397	39
EFNB2 Y304	CAV1 Y14	20		MAPK14 Y182	PTK2 Y576	14		ANXA2 Y30	ANXA2 Y238	44		EGFR Y1172	SHB Y268	54		MAPK1 T185 Y187	BCAR1 Y249	21		BCAR1 Y234	ITGB4 Y1207	39
DSC3 Y818	EPHA2 Y588	20		EPHB1 Y600	EGFR Y1092	14		EPHB1 Y600	PTRF Y308	44		DSC3 Y818	BCAR1 Y387	54		ENO1 Y44	ACP1 Y132	21		AFAP1L2 Y413	ALB Y164	39
CTNND1 Y228	PTPRA Y798	20		PTRF Y308	ALB Y164	14		SHC1 Y349	LDLR Y845	44		DSC3 Y818	BCAR1 Y249	54		TNK2 Y859	ALB Y164	21		RIN1 Y36	BCAR3 Y266	39
CTNND1 Y228	AFAP1L2 Y413	20		INSR Y1189	PTK2 Y576	13		SHC1 Y349	PTPN11 Y62	44		CAV1 Y14	EPHB1 Y600	54		PRPF4B Y849	MAPK3 Y204	21		MAPK1 Y187	SKT Y393	39
CTNND1 Y228	SGK223 Y413	20		STAT3 Y704	EPHA2 Y575	13		STAT3 Y705	SHB Y268	44		PRPF4B Y849	SHC1 Y349	54		EPHA2 Y588 Y594	DYRK1A Y321	21		MAPK1 Y187	ALB Y164	39
CTNND1 Y228	INSR Y1185	20		STAT3 Y704	EPHA2 Y772	13		FYN Y420	PTK2 Y397	44		MAPK3 Y204	MPZL1 Y263	54		INSR Y1185	ERBB2IP Y1104	21		INPPL1 Y986	STAT3 Y705	39
CDK2 Y15	BCAR3 Y266	20		STAT3 Y704	EPHB1 Y600	13		GPRC5A Y347	ALB Y164	44		FYN Y420	ALB Y164	54		INSR Y1185	PTK2 Y576	21		EPHA2 Y772	LDLR Y845	39
BCAR1 Y387	EPHB1 Y600	20		ERBB2 Y1248	EPHA2 Y772	13		ACP1 Y132	PTK2 Y397	44		BCAR1 Y249	PTPN11 Y62	54		MAPK14 Y182	DYRK1A Y321	21		ITGB4 Y1207	ERBB2IP Y1104	39
BCAR1 Y327	PIK3R2 Y464	20		EFNB2 Y304	FYN Y420	13		INSR Y1189	SKT Y393	43		INSR Y1189	MAPK1 Y187	53		PTRF Y308	ERBB2IP Y1104	21		TNK2 Y859	ERBB2IP Y1104	39
BCAR1 Y327	INSR Y1185	20		MAPK1 T185 Y187	FYN Y420	13		STAT3 Y704	DYRK1A Y321	43		INSR Y1189	MAPK1 T185 Y187	53		EPHA2 Y588	GPRC5A Y347	21		CAV1 Y14	GPRC5A Y347	39
ANXA2 Y24	EPHB1 Y600	20		SHC1 Y427	ITGB4 Y1207	13		ERBB2 Y1248	FYN Y420	43		PXN S84 Y88	CTNND1 Y228	53		ERBB2 Y1248	ITGB4 Y1207	20		SGK223 Y413	DYRK1A Y321	39
ANXA2 Y24	DYRK1A Y321	20		INPPL1 Y986	EPHB1 Y600	13		BCAR1 Y327	LDLR Y845	43		PXN S84 Y88	GRLF1 Y1105	53		BCAR1 Y327	CRKL Y132	20		PTK2 Y397	MPZL1 Y263	39
AFAP1L2 Y413	BCAR1 Y249	20		ITGB4 Y1207	ERBB2IP Y1104	13		PIK3R2 Y464	FYN Y420	43		BCAR1 Y327	MAPK14 Y182	53		CDK2 Y15	GPRC5A Y347	20		PXN S84 Y88	SHC1 Y349	38
TFRC Y20	AFAP1L2 Y413	19		ITGB4 Y1207	PTK2 Y576	13		CRKL Y132	BCAR1 Y234	43		CRKL Y132	FYN Y420	53		SH2D3A Y231 S218	GIT1 Y545	20		ERBB2 Y1248	CDK2 Y15	38
TFRC Y20	PRPF4B Y849	19		SGK223 Y413	PTRF Y308	13		EFNB2 Y304	PTRF Y308	43		SHC1 Y349 Y350	AFAP1L2 Y413	53		EPHA2 Y575	SHB Y268	20		BCAR1 Y327	EPHA2 Y588	38
TFRC Y20	PTK2 Y576	19		INSR Y1185	PTK2 Y576	13		EGFR Y1197	GRLF1 Y1105	43		SHC1 Y349 Y350	MAPK1 Y187	53		EGFR Y1197	SGK223 Y413	20		EPHA2 Y575	MAPK14 Y182	38
STAT3 Y705	ERBB2IP Y1104	19		MAPK14 Y182	FYN Y420	13		BCAR1 Y234	ANXA2 Y24	43		SHC1 Y349 Y350	BCAR1 Y387	53		EGFR Y1197	FYN Y420	20		BCAR1 Y234	EGFR Y1092	38
STAT3 Y704	ERBB2IP Y1104	19		EPHB1 Y600	SHC1 Y349	13		FAM59A Y453	PTPN11 Y62	43		SHC1 Y349 Y350	DYRK1A Y321	53		FAM59A Y453	PTK2 Y576	20		RIN1 Y36	PTK2 Y397	38
SHC1 Y427	ANXA2 Y238	19		SHC1 Y349	ALB Y164	13		ANXA2 Y24	ERBB2IP Y1104	43		SHC1 Y349 Y350	SHB Y268	53		PTPRA Y798	RIN1 Y36	20		ENO1 Y44	ALB Y164	38
SHC1 Y349 Y350	DYRK1A Y321	19		INSR Y1189	CTNND1 Y228	12		EPHA2 Y772	PKP3 Y176	43		EPHA2 Y575	EPHB1 Y600	53		MAPK1 T185 Y187	TNK2 Y859	20		BCAR1 Y387	EPHA2 Y588	38
SHC1 Y349	DYRK1A Y321	19		STAT3 Y704	INSR Y1185	12		DSC3 Y818	FYN Y420	43		EPHA2 Y575	ALB Y164	53		MAPK1 T185 Y187	GSK3B Y216	20		GSK3B Y216	PTK2 Y576	38
SH2D3A Y231 S218	ANXA2 Y238	19		ERBB2 Y1248	PTPRA Y798	12		STAT3 Y705	DYRK1A Y321	43		BCAR1 Y234	SHC1 Y349	53		ENO1 Y44	MAPK14 Y182	20		ATA2 Y20	FYN Y420	37
RIN1 Y36	DYRK1A Y321	19		SHC1 Y349 Y350	ITGB4 Y1207	12		INSR Y1189	BCAR3 Y266	42		FAM59A Y453	BCAR1 Y249	53		TNK2 Y859	FYN Y420	20		STAT3 Y704	RIN1 Y36	37
PXN S84 Y88	STAT3 Y704	19		EFNB2 Y304	PTK2 Y576	12		INSR Y1189	EPHB1 Y600	42		AFAP1L2 Y413	MPZL1 Y263	53		SKT Y393	MPZL1 Y263	20		ERBB2 Y1248	ANXA2 Y238	37
PXN S84 Y88	STAT3 Y705	19		GIT1 Y545	EPHA2 Y588	12		STAT3 Y704	SHB Y268	42		MAPK1 Y187	SHB Y268	53		SKT Y393	PTK2 Y576	20		BCAR1 Y327	SHC1 Y349	37
PRPF4B Y849	ERBB2IP Y1104	19		CTNND1 Y228	INSR Y1185	12		CRKL Y132	ERBB2IP Y1104	42		EGFR Y1172	PKP3 Y176	53		EPHA2 Y588 Y594	MAPK14 Y182	20		PIK3R2 Y464	ERBB2IP Y1104	37
PKP3 Y176	ALB Y164	19		AFAP1L2 Y413	EPHA2 Y588	12		SHC1 Y349 Y350	CDK2 Y15	42		MAPK1 T185 Y187	GSK3B Y216	53		GRLF1 Y1105	FYN Y420	20		EFNB2 Y304	GRLF1 Y1105	37
MAPK14 Y182	FYN Y420	19		MAPK1 Y187	FYN Y420	12		CDK2 Y15	EPHA2 Y772	42		INPPL1 Y986	MPZL1 Y263	53		EPHB1 Y600	PTK2 Y576	20		CDK2 Y15	PTK2 Y576	37
MAPK1 Y187	EPHA2 Y772	19		MAPK1 T185 Y187	PTK2 Y576	12		GIT1 Y545	CAV1 Y14	42		TNK2 Y859	SHB Y268	53		PTRF Y308	PTPN11 Y62	20		EGFR Y1197	SHB Y268	37
INSR Y1189	BCAR1 Y327	19		ENO1 Y44	FYN Y420	12		BCAR1 Y234	PTRF Y308	42		SHC1 Y349	GSK3B Y216	53		GSK3B Y216	BCAR1 Y249	20		BCAR1 Y234	EPHA2 Y588	37
GIT1 Y545	CTNND1 Y228	19		ITGB4 Y1207	SKT Y393	12		FAM59A Y453	SGK223 Y413	42		MAPK3 Y204	SHB Y268	53		LDLR Y845	PTK2 Y576	20		CTNND1 Y228	EPHA2 Y588	37
FYN Y420	GPRC5A Y347	19		ITGB4 Y1207	FYN Y420	12		RIN1 Y36	PTPN11 Y62	42		INSR Y1189	SHC1 Y427	52		ATA2 Y20	ALB Y164	19		PTPRA Y798	TNK2 Y859	37
ERBB2 Y1248	FYN Y420	19		TNK2 Y859	EPHB1 Y600	12		BCAR3 Y266	MPZL1 Y263	42		INSR Y1189	MAPK3 Y204	52		INSR Y1189	MAPK14 Y182	19		PXN Y118	EPHA2 Y772	37
EPHA2 Y772	MAPK3 Y204	19		SKT Y393	ALB Y164	12		MAPK1 T185 Y187	PTPN11 Y62	42		INSR Y1189	EGFR Y1092	52		STAT3 Y704	ANXA2 Y30	19		RIN1 Y36	ANXA2 Y238	37
EPHA2 Y575	GIT1 Y545	19		PRPF4B Y849	STAT3 Y705	12		DSC3 Y818	MAPK14 Y182	42		PXN S84 Y88	GSK3B Y216	52		ERBB2 Y1248	ANXA2 Y238	19		ANXA2 Y24	PTPN11 Y62	37
EFNB2 Y304	EGFR Y1197	19		GSK3B Y216	FYN Y420	12		PRPF4B Y849	FYN Y420	42		ERBB2 Y1248	INSR Y1185	52		BCAR1 Y327	ENO1 Y44	19		MAPK1 Y187	LDLR Y845	37
DSC3 Y818	GSK3B Y216	19		GSK3B Y216	ERBB2IP Y1104	12		BCAR1 Y387	ALB Y164	42		SHC1 Y349 Y350	MAPK1 T185 Y187	52		BCAR1 Y327	ITGB4 Y1207	19		MAPK1 Y187	PTK2 Y576	37
CTNND1 Y228	PRPF4B Y849	19		ACP1 Y132	ERBB2IP Y1104	12		GRLF1 Y1105	ALB Y164	42		EGFR Y1197	PKP3 Y176	52		PIK3R2 Y464	TFRC Y20	19		BCAR3 Y266	PRPF4B Y849	37
CDK2 Y15	ERBB2IP Y1104	19		PTK2 Y397	PTK2 Y576	12		PTRF Y308	ERBB2IP Y1104	42		EGFR Y1197	SHB Y268	52		PIK3R2 Y464	MAPK14 Y182	19		EPHA2 Y772	MAPK3 Y204	37
BCAR3 Y266	DYRK1A Y321	19		ATA2 Y20	ITGB4 Y1207	11		GSK3B Y216	STAT3 Y705	42		BCAR1 Y234	MAPK1 T185 Y187	52		PIK3R2 Y464	FYN Y420	19		ITGB4 Y1207	BCAR1 Y387	37
BCAR1 Y327	EPHB1 Y600	19		INSR Y1189	EGFR Y1197	11		STAT3 Y705	LDLR Y845	42		BCAR1 Y234	MAPK3 Y204	52		TFRC Y20	SH2D3A Y231 S218	19		ACP1 Y132	PTK2 Y397	37
BCAR1 Y327	GSK3B Y216	19		INSR Y1189	SHC1 Y427	11		FYN Y420	PTPN11 Y62	42		FAM59A Y453	EGFR Y1092	52		EFNB2 Y304	DYRK1A Y321	19		ANXA2 Y238	PTK2 Y576	37
BCAR1 Y327	ALB Y164	19		INSR Y1189	SKT Y393	11		CRKL Y132	ACP1 Y132	41		PTPRA Y798	INPPL1 Y986	52		EFNB2 Y304	PTK2 Y576	19		ATA2 Y20	PIK3R2 Y464	36
BCAR1 Y234	AFAP1L2 Y413	19		ERBB2 Y1248	MAPK3 Y204	11		EFNB2 Y304	GPRC5A Y347	41		ANXA2 Y30	PTK2 Y576	52		CDK2 Y15	CTNND1 Y228	19		ATA2 Y20	PXN Y118	36
ANXA2 Y24	EPHA2 Y588	19		SHC1 Y349 Y350	EPHB1 Y600	11		SH2D3A Y231 S218	FYN Y420	41		ITGB4 Y1207	SHC1 Y349	52		SH2D3A Y231 S218	ALB Y164	19		ATA2 Y20	ERBB2IP Y1104	36
AFAP1L2 Y413	MAPK1 T185 Y187	19		SH2D3A Y231 S218	ANXA2 Y24	11		EPHA2 Y575	ITGB4 Y1207	41		TNK2 Y859	PKP3 Y176	52		GIT1 Y545	ANXA2 Y30	19		INSR Y1189	EGFR Y1092	36
SHC1 Y427	EPHA2 Y588 Y594	18		SH2D3A Y231 S218	GRLF1 Y1105	11		RIN1 Y36	GRLF1 Y1105	41		EPHB1 Y600	ACP1 Y132	52		EGFR Y1197	LDLR Y845	19		ERBB2 Y1248	MAPK3 Y204	36
SH2D3A Y231 S218	EPHA2 Y588 Y594	18		EPHA2 Y575	DYRK1A Y321	11		ANXA2 Y30	MAPK3 Y204	41		MAPK3 Y204	GSK3B Y216	52		EGFR Y1197	PTK2 Y576	19		SHC1 Y349 Y350	SHB Y268	36
SGK223 Y413	BCAR1 Y249	18		EGFR Y1197	ITGB4 Y1207	11		EPHA2 Y772	GPRC5A Y347	41		PTRF Y308	PTK2 Y397	52		FAM59A Y453	EPHA2 Y588 Y594	19		CDK2 Y15	MAPK1 Y187	36
SGK223 Y413	PTPN11 Y62	18		EGFR Y1197	INSR Y1185	11		TNK2 Y859	LDLR Y845	41		ATA2 Y20	EFNB2 Y304	51		AFAP1L2 Y413	ACP1 Y132	19		CDK2 Y15	PTK2 Y397	36
PTPRA Y798	MAPK1 T185 Y187	18		ANXA2 Y24	ITGB4 Y1207	11		SKT Y393	CAV1 Y14	41		STAT3 Y704	PRPF4B Y849	51		EGFR Y1172	ITGB4 Y1207	19		GIT1 Y545	BCAR1 Y234	36
PRPF4B Y849	MAPK14 Y182	18		SHC1 Y427	EPHB1 Y600	11		SKT Y393	PTK2 Y397	41		BCAR1 Y327	EPHA2 Y588 Y594	51		BCAR3 Y266	ITGB4 Y1207	19		EGFR Y1197	ENO1 Y44	36
PIK3R2 Y464	BCAR3 Y266	18		EPHA2 Y772	PTK2 Y576	11		MAPK14 Y182	PTK2 Y397	41		SHC1 Y349 Y350	EPHA2 Y588	51		MAPK1 T185 Y187	FYN Y420	19		EGFR Y1197	PTRF Y308	36
ERBB2 Y1248	GSK3B Y216	18		ENO1 Y44	ERBB2IP Y1104	11		STAT3 Y705	PTPN11 Y62	41		FAM59A Y453	ITGB4 Y1207	51		ANXA2 Y30	STAT3 Y705	19		PTPRA Y798	MAPK14 Y182	36
EPHA2 Y588 Y594	MAPK14 Y182	18		ITGB4 Y1207	GRLF1 Y1105	11		STAT3 Y704	LDLR Y845	40		FAM59A Y453	GSK3B Y216	51		ENO1 Y44	BCAR1 Y249	19		AFAP1L2 Y413	SHC1 Y427	36
EPHA2 Y575	CAV1 Y14	18		ITGB4 Y1207	SHC1 Y349	11		EFNB2 Y304	AFAP1L2 Y413	40		PTPRA Y798	SHC1 Y349	51		ITGB4 Y1207	MAPK14 Y182	19		AFAP1L2 Y413	GRLF1 Y1105	36
EFNB2 Y304	INPPL1 Y986	18		ITGB4 Y1207	EGFR Y1092	11		EFNB2 Y304	CAV1 Y14	40		RIN1 Y36	SGK223 Y413	51		SKT Y393	FYN Y420	19		RIN1 Y36	STAT3 Y705	36
EFNB2 Y304	TNK2 Y859	18		SKT Y393	INSR Y1185	11		SH2D3A Y231 S218	MAPK14 Y182	40		ANXA2 Y30	FYN Y420	51		INSR Y1185	MAPK14 Y182	19		RIN1 Y36	LDLR Y845	36
EFNB2 Y304	FYN Y420	18		CAV1 Y14	EPHB1 Y600	11		SH2D3A Y231 S218	ACP1 Y132	40		PRPF4B Y849	STAT3 Y705	51		MAPK14 Y182	PTRF Y308	19		BCAR3 Y266	GSK3B Y216	36
CAV1 Y14	GPRC5A Y347	18		MAPK3 Y204	PTK2 Y576	11		EPHA2 Y575	MAPK14 Y182	40		BCAR1 Y387	DYRK1A Y321	51		MAPK3 Y204	FYN Y420	19		BCAR3 Y266	PTPN11 Y62	36
BCAR1 Y327	ITGB4 Y1207	18		ATA2 Y20	SH2D3A Y231 S218	10		CTNND1 Y228	EPHA2 Y588 Y594	40		GRLF1 Y1105	PTK2 Y576	51		PXN S84 Y88	BCAR3 Y266	18		ANXA2 Y30	LDLR Y845	36
ATA2 Y20	EFNB2 Y304	18		INSR Y1189	SHC1 Y349 Y350	10		CTNND1 Y228	PTPN11 Y62	40		DYRK1A Y321	BCAR1 Y249	51		STAT3 Y704	GPRC5A Y347	18		ANXA2 Y30	ANXA2 Y238	36
TFRC Y20	GIT1 Y545	17		INSR Y1189	EGFR Y1172	10		AFAP1L2 Y413	SKT Y393	40		INSR Y1189	CAV1 Y14	50		TFRC Y20	PXN Y118	18		EPHA2 Y772	GSK3B Y216	36
SKT Y393	INSR Y1185	17		INSR Y1189	CAV1 Y14	10		AFAP1L2 Y413	MAPK14 Y182	40		BCAR1 Y234	FAM59A Y453	50		CRKL Y132	TNK2 Y859	18		SHC1 Y349	PTPN11 Y62	36
SHC1 Y427	MAPK3 Y204	17		INSR Y1189	FYN Y420	10		ANXA2 Y24	ACP1 Y132	40		CTNND1 Y228	EGFR Y1092	50		EFNB2 Y304	FYN Y420	18		DYRK1A Y321	SHB Y268	36
SHC1 Y427	GSK3B Y216	17		INSR Y1189	EGFR Y1092	10		MAPK1 Y187	ANXA2 Y30	40		EPHA2 Y588	FYN Y420	50		CDK2 Y15	FAM59A Y453	18		LDLR Y845	ALB Y164	36
SHC1 Y427	GPRC5A Y347	17		TFRC Y20	MAPK1 Y187	10		MAPK1 Y187	ITGB4 Y1207	40		ATA2 Y20	EPHB1 Y600	49		CDK2 Y15	SHC1 Y349	18		PIK3R2 Y464	MAPK1 Y187	35
SHC1 Y427	SHB Y268	17		SH2D3A Y231 S218	CTNND1 Y228	10		CAV1 Y14	EPHB1 Y600	40		ERBB2 Y1248	EPHA2 Y588	49		SH2D3A Y231 S218	DYRK1A Y321	18		EPHA2 Y575	DYRK1A Y321	35
SHC1 Y349 Y350	GSK3B Y216	17		SH2D3A Y231 S218	ANXA2 Y30	10		CAV1 Y14	GSK3B Y216	40		PIK3R2 Y464	MPZL1 Y263	49		SH2D3A Y231 S218	FYN Y420	18		EPHA2 Y575	PTK2 Y397	35
SGK223 Y413	ANXA2 Y238	17		SH2D3A Y231 S218	SKT Y393	10		EPHB1 Y600	PTK2 Y397	40		SHC1 Y349 Y350	PTPRA Y798	49		SH2D3A Y231 S218	ANXA2 Y238	18		GIT1 Y545	ENO1 Y44	35
PIK3R2 Y464	BCAR1 Y387	17		SH2D3A Y231 S218	PKP3 Y176	10		ERBB2 Y1248	EPHB1 Y600	39		EGFR Y1197	INSR Y1185	49		GIT1 Y545	PKP3 Y176	18		PTPRA Y798	SHC1 Y427	35
MAPK14 Y182	EPHB1 Y600	17		EPHA2 Y575	SGK223 Y413	10		BCAR1 Y327	PXN Y118	39		FAM59A Y453	BCAR3 Y266	49		CTNND1 Y228	PTK2 Y397	18		RIN1 Y36	ACP1 Y132	35
MAPK1 Y187	SHC1 Y427	17		EPHA2 Y575	ERBB2IP Y1104	10		PIK3R2 Y464	EFNB2 Y304	39		EGFR Y1172	EPHA2 Y588	49		PTPRA Y798	DSC3 Y818	18		RIN1 Y36	BCAR1 Y249	35
MAPK1 T185 Y187	GSK3B Y216	17		EPHA2 Y575	ALB Y164	10		EFNB2 Y304	DSC3 Y818	39		SHC1 Y427	MPZL1 Y263	49		AFAP1L2 Y413	MAPK1 T185 Y187	18		ANXA2 Y24	EPHA2 Y588	35
INSR Y1189	SKT Y393	17		GIT1 Y545	PTRF Y308	10		EFNB2 Y304	PKP3 Y176	39		ITGB4 Y1207	MPZL1 Y263	49		AFAP1L2 Y413	BCAR1 Y249	18		EPHA2 Y772	BCAR1 Y249	35
GSK3B Y216	PKP3 Y176	17		CTNND1 Y228	PTPRA Y798	10		CDK2 Y15	EPHA2 Y588 Y594	39		TNK2 Y859	EPHA2 Y588	49		MAPK1 Y187	ALB Y164	18		ENO1 Y44	CAV1 Y14	35
GRLF1 Y1105	FYN Y420	17		PXN Y118	EPHA2 Y588	10		GIT1 Y545	ANXA2 Y24	39		CAV1 Y14	BCAR1 Y387	49		EGFR Y1172	LDLR Y845	18		BCAR1 Y387	SHC1 Y349	35
ERBB2 Y1248	BCAR1 Y327	17		AFAP1L2 Y413	PTRF Y308	10		GIT1 Y545	PKP3 Y176	39		CAV1 Y14	BCAR1 Y249	49		MAPK1 T185 Y187	ALB Y164	18		PKP3 Y176	EGFR Y1092	35
EPHA2 Y772	DSC3 Y818	17		EGFR Y1172	ITGB4 Y1207	10		EGFR Y1197	ANXA2 Y30	39		GSK3B Y216	MPZL1 Y263	49		MAPK1 T185 Y187	PTPN11 Y62	18		INSR Y1189	PTK2 Y576	34
EPHA2 Y772	BCAR1 Y249	17		EGFR Y1172	INSR Y1185	10		BCAR1 Y234	CAV1 Y14	39		INSR Y1189	PKP3 Y176	48		ANXA2 Y30	ALB Y164	18		BCAR1 Y327	ITGB4 Y1207	34
EFNB2 Y304	EGFR Y1172	17		SHC1 Y427	INSR Y1185	10		BCAR1 Y234	PRPF4B Y849	39		STAT3 Y704	CRKL Y132	48		ENO1 Y44	EPHA2 Y588	18		TFRC Y20	EPHA2 Y588	34
EFNB2 Y304	EGFR Y1092	17		ANXA2 Y30	ITGB4 Y1207	10		PTPRA Y798	ANXA2 Y30	39		STAT3 Y704	SHB Y268	48		ENO1 Y44	ERBB2IP Y1104	18		CDK2 Y15	RIN1 Y36	34
CDK2 Y15	ANXA2 Y24	17		INPPL1 Y986	ITGB4 Y1207	10		AFAP1L2 Y413	EPHB1 Y600	39		CRKL Y132	STAT3 Y705	48		ITGB4 Y1207	TNK2 Y859	18		CDK2 Y15	BCAR3 Y266	34
CDK2 Y15	DSC3 Y818	17		ITGB4 Y1207	TNK2 Y859	10		EGFR Y1172	ANXA2 Y30	39		EPHA2 Y575	DYRK1A Y321	48		ITGB4 Y1207	EPHA2 Y588	18		CDK2 Y15	SHC1 Y427	34
CDK2 Y15	BCAR1 Y387	17		ITGB4 Y1207	DSC3 Y818	10		SHC1 Y427	ANXA2 Y30	39		CTNND1 Y228	PTK2 Y576	48		PRPF4B Y849	EPHA2 Y588	18		EPHA2 Y575	EGFR Y1197	34
CDK2 Y15	PKP3 Y176	17		ITGB4 Y1207	CAV1 Y14	10		ANXA2 Y30	SHC1 Y349	39		AFAP1L2 Y413	CAV1 Y14	48		STAT3 Y705	GPRC5A Y347	18		GIT1 Y545	AFAP1L2 Y413	34
CAV1 Y14	EPHA2 Y588 Y594	17		ITGB4 Y1207	PKP3 Y176	10		INPPL1 Y986	GRLF1 Y1105	39		AFAP1L2 Y413	PKP3 Y176	48		ATA2 Y20	SHB Y268	17		RIN1 Y36	GSK3B Y216	34
CAV1 Y14	ANXA2 Y238	17		INSR Y1185	FYN Y420	10		EPHA2 Y772	MPZL1 Y263	39		EGFR Y1172	DYRK1A Y321	48		INSR Y1189	ANXA2 Y238	17		EGFR Y1172	ITGB4 Y1207	34
BCAR1 Y387	DYRK1A Y321	17		INSR Y1185	EGFR Y1092	10		DSC3 Y818	EPHB1 Y600	39		SHC1 Y427	BCAR1 Y387	48		ERBB2 Y1248	CTNND1 Y228	17		EGFR Y1172	PTPN11 Y62	34
BCAR1 Y327	ENO1 Y44	17		MAPK3 Y204	FYN Y420	10		CAV1 Y14	PRPF4B Y849	39		GRLF1 Y1105	EGFR Y1092	48		ERBB2 Y1248	SHC1 Y349	17		BCAR3 Y266	EPHA2 Y772	34
BCAR1 Y234	EPHA2 Y772	17		FYN Y420	PTK2 Y397	10		GRLF1 Y1105	EGFR Y1092	39		STAT3 Y705	SHB Y268	48		BCAR1 Y327	GSK3B Y216	17		BCAR3 Y266	ALB Y164	34
ANXA2 Y30	GPRC5A Y347	17		ACP1 Y132	PTK2 Y576	10		INSR Y1185	ALB Y164	39		MPZL1 Y263	BCAR1 Y249	48		BCAR1 Y327	ERBB2IP Y1104	17		INPPL1 Y986	ERBB2IP Y1104	34
ANXA2 Y30	ALB Y164	17		ALB Y164	PTPN11 Y62	10		PTRF Y308	ACP1 Y132	39		ATA2 Y20	GIT1 Y545	47		PIK3R2 Y464	EPHA2 Y588 Y594	17		ENO1 Y44	GRLF1 Y1105	34
ANXA2 Y24	GSK3B Y216	17		INSR Y1189	INPPL1 Y986	9		GSK3B Y216	GPRC5A Y347	39		ATA2 Y20	EPHA2 Y588 Y594	47		SHC1 Y349 Y350	AFAP1L2 Y413	17		ITGB4 Y1207	BCAR1 Y249	34
AFAP1L2 Y413	PTPN11 Y62	17		INSR Y1189	TNK2 Y859	9		ALB Y164	PTPN11 Y62	39		ERBB2 Y1248	DYRK1A Y321	47		SHC1 Y349 Y350	GSK3B Y216	17		CAV1 Y14	PTRF Y308	34
STAT3 Y705	GPRC5A Y347	16		INSR Y1189	SHC1 Y349	9		INSR Y1189	BCAR1 Y234	38		EFNB2 Y304	ENO1 Y44	47		EFNB2 Y304	PRPF4B Y849	17		BCAR1 Y249	ALB Y164	34
STAT3 Y704	GPRC5A Y347	16		STAT3 Y704	PRPF4B Y849	9		INSR Y1189	ERBB2IP Y1104	38		EFNB2 Y304	EGFR Y1092	47		CDK2 Y15	SH2D3A Y231 S218	17		INSR Y1189	ERBB2IP Y1104	33
SKT Y393	MAPK3 Y204	16		ERBB2 Y1248	MAPK1 Y187	9		STAT3 Y704	PTPN11 Y62	38		EPHA2 Y575	EPHA2 Y588 Y594	47		AFAP1L2 Y413	ERBB2IP Y1104	17		PXN S84 Y88	SHC1 Y427	33
SHC1 Y427	LDLR Y845	16		ERBB2 Y1248	PTK2 Y397	9		ERBB2 Y1248	SKT Y393	38		FAM59A Y453	CAV1 Y14	47		RIN1 Y36	MAPK1 T185 Y187	17		PXN S84 Y88	INPPL1 Y986	33
SHC1 Y349 Y350	CDK2 Y15	16		SHC1 Y349 Y350	INSR Y1185	9		BCAR1 Y327	EPHA2 Y588 Y594	38		SKT Y393	EPHB1 Y600	47		RIN1 Y36	FYN Y420	17		ERBB2 Y1248	PTRF Y308	33
SH2D3A Y231 S218	DSC3 Y818	16		CDK2 Y15	FAM59A Y453	9		PIK3R2 Y464	SKT Y393	38		FYN Y420	GPRC5A Y347	47		ANXA2 Y24	SHB Y268	17		ERBB2 Y1248	MPZL1 Y263	33
PRPF4B Y849	EPHA2 Y588 Y594	16		CDK2 Y15	SHB Y268	9		PIK3R2 Y464	EPHB1 Y600	38		STAT3 Y704	MPZL1 Y263	46		MAPK1 T185 Y187	INPPL1 Y986	17		EFNB2 Y304	EPHA2 Y588	33
MAPK1 Y187	ANXA2 Y30	16		SH2D3A Y231 S218	EGFR Y1197	9		SH2D3A Y231 S218	SKT Y393	38		SHC1 Y349 Y350	BCAR3 Y266	46		MAPK1 T185 Y187	SGK223 Y413	17		SH2D3A Y231 S218	EGFR Y1092	33
MAPK1 Y187	SKT Y393	16		SH2D3A Y231 S218	EGFR Y1092	9		SH2D3A Y231 S218	EPHB1 Y600	38		EFNB2 Y304	BCAR1 Y249	46		MAPK1 T185 Y187	EGFR Y1092	17		EGFR Y1197	ALB Y164	33
FAM59A Y453	PXN Y118	16		EPHA2 Y575	GIT1 Y545	9		BCAR1 Y234	CTNND1 Y228	38		EGFR Y1197	BCAR1 Y234	46		MAPK1 T185 Y187	PTK2 Y576	17		RIN1 Y36	EPHA2 Y588 Y594	33
EPHA2 Y772	SHC1 Y349	16		EPHA2 Y575	AFAP1L2 Y413	9		BCAR1 Y234	AFAP1L2 Y413	38		EGFR Y1197	DYRK1A Y321	46		ANXA2 Y30	SHB Y268	17		BCAR3 Y266	INPPL1 Y986	33
EPHA2 Y575	SHC1 Y427	16		EPHA2 Y575	GRLF1 Y1105	9		BCAR1 Y234	PTPN11 Y62	38		EGFR Y1197	EPHA2 Y588	46		ITGB4 Y1207	ANXA2 Y238	17		SHC1 Y427	PTK2 Y397	33
EFNB2 Y304	MAPK14 Y182	16		EPHA2 Y575	SHC1 Y349	9		AFAP1L2 Y413	BCAR1 Y387	38		EGFR Y1197	BCAR1 Y249	46		SGK223 Y413	MPZL1 Y263	17		ANXA2 Y30	ITGB4 Y1207	33
BCAR3 Y266	ALB Y164	16		GIT1 Y545	BCAR1 Y234	9		EGFR Y1172	ITGB4 Y1207	38		FAM59A Y453	PRPF4B Y849	46		PRPF4B Y849	LDLR Y845	17		INPPL1 Y986	ENO1 Y44	33
BCAR1 Y387	ALB Y164	16		GIT1 Y545	BCAR1 Y387	9		SHC1 Y427	ITGB4 Y1207	38		SHC1 Y427	SGK223 Y413	46		BCAR1 Y387	ERBB2IP Y1104	17		INPPL1 Y986	BCAR1 Y249	33
BCAR1 Y234	SGK223 Y413	16		FAM59A Y453	PTPRA Y798	9		ANXA2 Y30	INPPL1 Y986	38		SHC1 Y427	PRPF4B Y849	46		GRLF1 Y1105	PTK2 Y397	17		ITGB4 Y1207	CAV1 Y14	33
ATA2 Y20	EPHA2 Y575	16		CTNND1 Y228	MAPK3 Y204	9		ANXA2 Y30	EGFR Y1092	38		ENO1 Y44	EPHA2 Y588 Y594	46		INSR Y1185	ANXA2 Y238	17		CAV1 Y14	MAPK14 Y182	33
ATA2 Y20	EPHA2 Y588 Y594	16		PTPRA Y798	RIN1 Y36	9		EPHA2 Y772	INSR Y1185	38		TNK2 Y859	DYRK1A Y321	46		EPHB1 Y600	DYRK1A Y321	17		CAV1 Y14	PTPN11 Y62	33
ATA2 Y20	GPRC5A Y347	16		PTPRA Y798	SKT Y393	9		ENO1 Y44	FYN Y420	38		MAPK14 Y182	FYN Y420	46		MAPK3 Y204	ACP1 Y132	17		GRLF1 Y1105	EPHB1 Y600	33
ATA2 Y20	ANXA2 Y238	16		INPPL1 Y986	INSR Y1185	9		ITGB4 Y1207	SHC1 Y349	38		EPHB1 Y600	EGFR Y1092	46		MAPK3 Y204	PTK2 Y576	17		GSK3B Y216	PTK2 Y397	33
ANXA2 Y30	EPHA2 Y772	16		EPHA2 Y772	FYN Y420	9		TNK2 Y859	EPHA2 Y588	38		BCAR1 Y327	SHB Y268	45		EPHA2 Y588	FYN Y420	17		EPHA2 Y588	ERBB2IP Y1104	33
ANXA2 Y30	MAPK3 Y204	16		TNK2 Y859	INSR Y1185	9		TNK2 Y859	PTPN11 Y62	38		EFNB2 Y304	EPHA2 Y575	45		PKP3 Y176	PTK2 Y397	17		ERBB2IP Y1104	ANXA2 Y238	33
ANXA2 Y30	SHB Y268	16		DSC3 Y818	ALB Y164	9		DSC3 Y818	SKT Y393	38		EFNB2 Y304	BCAR1 Y387	45		INSR Y1189	ANXA2 Y30	16		PXN S84 Y88	EGFR Y1172	32
TFRC Y20	SGK223 Y413	15		CAV1 Y14	INSR Y1185	9		CAV1 Y14	BCAR1 Y387	38		SH2D3A Y231 S218	EGFR Y1172	45		INSR Y1189	EPHA2 Y588 Y594	16		ERBB2 Y1248	SKT Y393	32
STAT3 Y704	GSK3B Y216	15		SGK223 Y413	PTPN11 Y62	9		CAV1 Y14	ERBB2IP Y1104	38		BCAR1 Y234	EPHA2 Y588 Y594	45		INSR Y1189	PTK2 Y397	16		CRKL Y132	EPHA2 Y588	32
SHC1 Y427	EPHB1 Y600	15		PRPF4B Y849	PTK2 Y576	9		EPHA2 Y588 Y594	GRLF1 Y1105	38		PTPRA Y798	BCAR1 Y387	45		PXN S84 Y88	BCAR1 Y327	16		EPHA2 Y575	MAPK1 Y187	32
SHC1 Y349	GSK3B Y216	15		EPHA2 Y588 Y594	ALB Y164	9		EPHA2 Y588 Y594	MAPK14 Y182	38		PTPRA Y798	BCAR1 Y249	45		PXN S84 Y88	MAPK3 Y204	16		EGFR Y1197	EPHA2 Y772	32
SHC1 Y349	ALB Y164	15		INSR Y1185	SHC1 Y349	9		STAT3 Y705	EPHA2 Y588	38		RIN1 Y36	EGFR Y1092	45		STAT3 Y704	SHC1 Y349 Y350	16		FAM59A Y453	EPHB1 Y600	32
RIN1 Y36	GSK3B Y216	15		STAT3 Y705	GPRC5A Y347	9		FYN Y420	ANXA2 Y238	38		ANXA2 Y30	GRLF1 Y1105	45		BCAR1 Y327	PIK3R2 Y464	16		AFAP1L2 Y413	SHB Y268	32
PXN Y118	EPHA2 Y588	15		FYN Y420	ACP1 Y132	9		ATA2 Y20	PXN S84 Y88	37		INPPL1 Y986	FYN Y420	45		SHC1 Y349 Y350	STAT3 Y705	16		MAPK1 Y187	FYN Y420	32
PIK3R2 Y464	EGFR Y1197	15		GPRC5A Y347	ERBB2IP Y1104	9		ATA2 Y20	BCAR1 Y327	37		SHC1 Y349	ACP1 Y132	45		SHC1 Y349 Y350	DYRK1A Y321	16		BCAR3 Y266	SHC1 Y349	32
PIK3R2 Y464	CAV1 Y14	15		LDLR Y845	ALB Y164	9		PXN S84 Y88	INSR Y1185	37		SHC1 Y349	BCAR1 Y249	45		CDK2 Y15	ANXA2 Y30	16		SHC1 Y427	DYRK1A Y321	32
PIK3R2 Y464	BCAR1 Y249	15		MPZL1 Y263	ALB Y164	9		STAT3 Y704	EPHA2 Y588	37		SHB Y268	ERBB2IP Y1104	45		SH2D3A Y231 S218	MAPK14 Y182	16		EPHA2 Y772	MAPK14 Y182	32
MAPK14 Y182	LDLR Y845	15		ERBB2 Y1248	FYN Y420	8		ERBB2 Y1248	ERBB2IP Y1104	37		PIK3R2 Y464	SHC1 Y349	44		EPHA2 Y575	ANXA2 Y30	16		BCAR1 Y387	EGFR Y1092	32
MAPK1 Y187	CAV1 Y14	15		BCAR1 Y327	GIT1 Y545	8		PIK3R2 Y464	BCAR1 Y387	37		SH2D3A Y231 S218	SHC1 Y349	44		GIT1 Y545	ANXA2 Y24	16		GRLF1 Y1105	LDLR Y845	32
ITGB4 Y1207	BCAR1 Y387	15		CRKL Y132	FYN Y420	8		CRKL Y132	EPHA2 Y772	37		EGFR Y1197	SGK223 Y413	44		EGFR Y1197	DYRK1A Y321	16		PXN S84 Y88	PKP3 Y176	31
GSK3B Y216	STAT3 Y705	15		CRKL Y132	PTK2 Y576	8		GIT1 Y545	INSR Y1185	37		FAM59A Y453	AFAP1L2 Y413	44		FAM59A Y453	EPHA2 Y588	16		PXN S84 Y88	MPZL1 Y263	31
ERBB2 Y1248	CTNND1 Y228	15		SHC1 Y349 Y350	SH2D3A Y231 S218	8		PXN Y118	ANXA2 Y30	37		CTNND1 Y228	ANXA2 Y30	44		CTNND1 Y228	PTPN11 Y62	16		ERBB2 Y1248	PKP3 Y176	31
ERBB2 Y1248	SGK223 Y413	15		CDK2 Y15	EGFR Y1197	8		AFAP1L2 Y413	GSK3B Y216	37		PXN Y118	TNK2 Y859	44		PTPRA Y798	GRLF1 Y1105	16		BCAR1 Y327	EGFR Y1092	31
EPHB1 Y600	BCAR1 Y249	15		CDK2 Y15	CTNND1 Y228	8		AFAP1L2 Y413	ERBB2IP Y1104	37		AFAP1L2 Y413	EPHB1 Y600	44		ANXA2 Y24	PTK2 Y576	16		SH2D3A Y231 S218	EPHA2 Y772	31
EPHA2 Y588 Y594	GSK3B Y216	15		SH2D3A Y231 S218	EGFR Y1172	8		ANXA2 Y24	EPHA2 Y772	37		RIN1 Y36	CAV1 Y14	44		BCAR3 Y266	ENO1 Y44	16		EPHA2 Y575	CTNND1 Y228	31
EPHA2 Y575	PRPF4B Y849	15		SH2D3A Y231 S218	SHC1 Y427	8		BCAR3 Y266	CAV1 Y14	37		PRPF4B Y849	MPZL1 Y263	44		BCAR3 Y266	ERBB2IP Y1104	16		GIT1 Y545	ANXA2 Y24	31
EPHA2 Y575	GSK3B Y216	15		SH2D3A Y231 S218	INPPL1 Y986	8		MAPK1 T185 Y187	BCAR1 Y387	37		FYN Y420	PKP3 Y176	44		MAPK1 T185 Y187	BCAR1 Y387	16		EGFR Y1197	GPRC5A Y347	31
CDK2 Y15	RIN1 Y36	15		SH2D3A Y231 S218	TNK2 Y859	8		INPPL1 Y986	PTPN11 Y62	37		LDLR Y845	PTK2 Y397	44		SHC1 Y427	SHB Y268	16		BCAR1 Y234	INPPL1 Y986	31
CAV1 Y14	EPHB1 Y600	15		SH2D3A Y231 S218	DSC3 Y818	8		EPHA2 Y772	PTRF Y308	37		CDK2 Y15	PTK2 Y576	43		ANXA2 Y30	INSR Y1185	16		BCAR1 Y234	ALB Y164	31
CAV1 Y14	MAPK3 Y204	15		SH2D3A Y231 S218	CAV1 Y14	8		DSC3 Y818	BCAR1 Y387	37		SH2D3A Y231 S218	GRLF1 Y1105	43		ANXA2 Y30	PTK2 Y397	16		FAM59A Y453	PTPN11 Y62	31
BCAR3 Y266	ITGB4 Y1207	15		SH2D3A Y231 S218	SHC1 Y349	8		DSC3 Y818	ERBB2IP Y1104	37		CTNND1 Y228	CAV1 Y14	43		SKT Y393	PKP3 Y176	16		RIN1 Y36	INPPL1 Y986	31
BCAR1 Y387	GSK3B Y216	15		EPHA2 Y575	DSC3 Y818	8		SKT Y393	PRPF4B Y849	37		EGFR Y1172	BCAR3 Y266	43		SGK223 Y413	GPRC5A Y347	16		MAPK1 Y187	PKP3 Y176	31
BCAR1 Y327	PRPF4B Y849	15		GIT1 Y545	BCAR3 Y266	8		SKT Y393	PTPN11 Y62	37		ANXA2 Y30	MAPK3 Y204	43		SGK223 Y413	PKP3 Y176	16		SHC1 Y427	LDLR Y845	31
BCAR1 Y327	MAPK14 Y182	15		GIT1 Y545	BCAR1 Y249	8		SGK223 Y413	FYN Y420	37		MAPK14 Y182	PTK2 Y397	43		PRPF4B Y849	EPHB1 Y600	16		SHC1 Y427	ANXA2 Y238	31
ATA2 Y20	PIK3R2 Y464	15		EGFR Y1197	FYN Y420	8		EPHA2 Y588 Y594	DYRK1A Y321	37		ANXA2 Y238	PTK2 Y576	43		PRPF4B Y849	ANXA2 Y238	16		ANXA2 Y30	PTPN11 Y62	31
AFAP1L2 Y413	ANXA2 Y238	15		BCAR1 Y234	AFAP1L2 Y413	8		GRLF1 Y1105	BCAR1 Y249	37		INSR Y1189	EPHA2 Y575	42		EPHA2 Y588 Y594	INSR Y1185	16		INPPL1 Y986	SHB Y268	31
TNK2 Y859	EPHA2 Y588 Y594	14		PTPRA Y798	SHB Y268	8		MAPK14 Y182	ACP1 Y132	37		ERBB2 Y1248	BCAR3 Y266	42		EPHA2 Y588 Y594	FYN Y420	16		EPHA2 Y772	INSR Y1185	31
TNK2 Y859	GPRC5A Y347	14		AFAP1L2 Y413	BCAR1 Y387	8		GSK3B Y216	FYN Y420	37		PIK3R2 Y464	FAM59A Y453	42		GRLF1 Y1105	PTK2 Y576	16		EPHA2 Y772	ANXA2 Y238	31
TNK2 Y859	ANXA2 Y238	14		RIN1 Y36	EPHA2 Y772	8		PTK2 Y397	ERBB2IP Y1104	37		CRKL Y132	PTK2 Y576	42		INSR Y1185	PTK2 Y397	16		MAPK14 Y182	GSK3B Y216	31
STAT3 Y704	EFNB2 Y304	14		BCAR3 Y266	SGK223 Y413	8		EGFR Y1092	PTPN11 Y62	37		SH2D3A Y231 S218	CTNND1 Y228	42		EPHB1 Y600	FYN Y420	16		PKP3 Y176	ALB Y164	31
STAT3 Y704	MAPK1 Y187	14		SKT Y393	MAPK3 Y204	8		ERBB2 Y1248	EFNB2 Y304	36		EPHA2 Y575	FYN Y420	42		SHC1 Y349	PTPN11 Y62	16		ALB Y164	ANXA2 Y238	31
STAT3 Y704	MAPK3 Y204	14		SGK223 Y413	EPHA2 Y588 Y594	8		PIK3R2 Y464	BCAR1 Y234	36		PTPRA Y798	EGFR Y1172	42		FYN Y420	PTPN11 Y62	16		STAT3 Y704	SGK223 Y413	30
SHC1 Y427	EPHA2 Y588	14		SGK223 Y413	LDLR Y845	8		PIK3R2 Y464	GSK3B Y216	36		BCAR3 Y266	PTK2 Y397	42		PKP3 Y176	ALB Y164	16		BCAR1 Y234	SHC1 Y349	30
SH2D3A Y231 S218	SHC1 Y427	14		SGK223 Y413	MPZL1 Y263	8		PIK3R2 Y464	ERBB2IP Y1104	36		EPHA2 Y588 Y594	GPRC5A Y347	42		PTK2 Y397	MPZL1 Y263	16		FAM59A Y453	SHB Y268	30
SGK223 Y413	LDLR Y845	14		PRPF4B Y849	FYN Y420	8		CDK2 Y15	BCAR1 Y249	36		EPHA2 Y588 Y594	PTK2 Y576	42		MPZL1 Y263	ANXA2 Y238	16		PTPRA Y798	EGFR Y1172	30
SGK223 Y413	ERBB2IP Y1104	14		STAT3 Y704	GPRC5A Y347	7		SH2D3A Y231 S218	ERBB2IP Y1104	36		GRLF1 Y1105	MAPK14 Y182	42		ATA2 Y20	GIT1 Y545	15		PXN Y118	EGFR Y1172	30
PXN Y118	LDLR Y845	14		ERBB2 Y1248	CDK2 Y15	7		GIT1 Y545	AFAP1L2 Y413	36		DYRK1A Y321	PTK2 Y576	42		ATA2 Y20	DYRK1A Y321	15		AFAP1L2 Y413	BCAR3 Y266	30
PXN Y118	ANXA2 Y238	14		ERBB2 Y1248	PTK2 Y576	7		EGFR Y1197	ITGB4 Y1207	36		EPHA2 Y588	MPZL1 Y263	42		INSR Y1189	BCAR3 Y266	15		RIN1 Y36	PRPF4B Y849	30
PIK3R2 Y464	EGFR Y1172	14		BCAR1 Y327	AFAP1L2 Y413	7		BCAR1 Y234	DSC3 Y818	36		LDLR Y845	ALB Y164	42		STAT3 Y704	CRKL Y132	15		INPPL1 Y986	PTPN11 Y62	30
PIK3R2 Y464	INPPL1 Y986	14		BCAR1 Y327	SGK223 Y413	7		BCAR1 Y234	PTK2 Y397	36		LDLR Y845	PTK2 Y576	42		STAT3 Y704	SHB Y268	15		ITGB4 Y1207	MAPK14 Y182	30
PIK3R2 Y464	EGFR Y1092	14		TFRC Y20	PTK2 Y397	7		CTNND1 Y228	EPHA2 Y772	36		BCAR1 Y327	GIT1 Y545	41		BCAR1 Y327	PXN Y118	15		TNK2 Y859	MAPK14 Y182	30
MAPK3 Y204	STAT3 Y705	14		CDK2 Y15	RIN1 Y36	7		PXN Y118	MAPK14 Y182	36		TFRC Y20	EPHA2 Y772	41		CRKL Y132	DSC3 Y818	15		DSC3 Y818	EPHA2 Y588	30
MAPK1 Y187	STAT3 Y705	14		CDK2 Y15	SKT Y393	7		RIN1 Y36	ITGB4 Y1207	36		EFNB2 Y304	ANXA2 Y24	41		CRKL Y132	STAT3 Y705	15		SKT Y393	PTK2 Y576	30
MAPK1 T185 Y187	PRPF4B Y849	14		CDK2 Y15	SHC1 Y349	7		ANXA2 Y24	GSK3B Y216	36		EFNB2 Y304	GPRC5A Y347	41		CDK2 Y15	ANXA2 Y24	15		SGK223 Y413	STAT3 Y705	30
INPPL1 Y986	EPHB1 Y600	14		CDK2 Y15	STAT3 Y705	7		BCAR3 Y266	PTK2 Y397	36		EPHA2 Y575	INSR Y1185	41		CDK2 Y15	LDLR Y845	15		PTRF Y308	PTK2 Y576	30
GSK3B Y216	BCAR1 Y249	14		EPHA2 Y575	EGFR Y1197	7		ENO1 Y44	MAPK14 Y182	36		EGFR Y1197	AFAP1L2 Y413	41		CDK2 Y15	PKP3 Y176	15		PKP3 Y176	PTK2 Y397	30
ERBB2 Y1248	AFAP1L2 Y413	14		GIT1 Y545	EPHA2 Y588 Y594	7		TNK2 Y859	GSK3B Y216	36		CTNND1 Y228	MAPK14 Y182	41		SH2D3A Y231 S218	EPHA2 Y575	15		INSR Y1189	ANXA2 Y24	29
EPHA2 Y772	PKP3 Y176	14		GIT1 Y545	LDLR Y845	7		DSC3 Y818	GSK3B Y216	36		AFAP1L2 Y413	SHB Y268	41		SH2D3A Y231 S218	SGK223 Y413	15		STAT3 Y704	PTRF Y308	29
EGFR Y1197	EPHB1 Y600	14		GIT1 Y545	MPZL1 Y263	7		PRPF4B Y849	EPHB1 Y600	36		EPHA2 Y772	PTPN11 Y62	41		SH2D3A Y231 S218	EPHA2 Y588 Y594	15		STAT3 Y704	MPZL1 Y263	29
EGFR Y1197	GSK3B Y216	14		GIT1 Y545	PTPN11 Y62	7		PRPF4B Y849	ERBB2IP Y1104	36		ENO1 Y44	EPHB1 Y600	41		MAPK1 Y187	PTK2 Y576	15		PIK3R2 Y464	FAM59A Y453	29
EFNB2 Y304	STAT3 Y705	14		EGFR Y1197	PXN Y118	7		EPHB1 Y600	PTPN11 Y62	36		GRLF1 Y1105	INSR Y1185	41		BCAR3 Y266	INSR Y1185	15		PIK3R2 Y464	SHC1 Y349	29
DYRK1A Y321	BCAR1 Y249	14		EGFR Y1197	SGK223 Y413	7		DYRK1A Y321	BCAR1 Y249	36		INSR Y1185	ERBB2IP Y1104	41		BCAR3 Y266	GSK3B Y216	15		SHC1 Y349 Y350	EPHA2 Y575	29
CRKL Y132	FYN Y420	14		EGFR Y1197	GPRC5A Y347	7		ERBB2IP Y1104	PTPN11 Y62	36		MAPK14 Y182	ALB Y164	41		MAPK1 T185 Y187	EPHA2 Y772	15		SH2D3A Y231 S218	ERBB2IP Y1104	29
CDK2 Y15	BCAR1 Y234	14		EGFR Y1197	PTK2 Y576	7		ERBB2 Y1248	GIT1 Y545	35		STAT3 Y705	MPZL1 Y263	41		MAPK1 T185 Y187	CAV1 Y14	15		EPHA2 Y575	EPHA2 Y588 Y594	29
CDK2 Y15	SHC1 Y349	14		CTNND1 Y228	EPHA2 Y772	7		ERBB2 Y1248	BCAR1 Y234	35		ERBB2 Y1248	PTPRA Y798	40		INPPL1 Y986	ITGB4 Y1207	15		FAM59A Y453	EPHA2 Y588	29
CAV1 Y14	LDLR Y845	14		AFAP1L2 Y413	BCAR3 Y266	7		PIK3R2 Y464	GIT1 Y545	35		BCAR1 Y327	EPHA2 Y575	40		EPHA2 Y772	MAPK14 Y182	15		CTNND1 Y228	EGFR Y1092	29
BCAR3 Y266	GSK3B Y216	14		AFAP1L2 Y413	EPHA2 Y588 Y594	7		CRKL Y132	ALB Y164	35		PTPRA Y798	TNK2 Y859	40		ITGB4 Y1207	EGFR Y1092	15		MAPK1 Y187	EPHA2 Y772	29
BCAR1 Y327	GPRC5A Y347	14		AFAP1L2 Y413	LDLR Y845	7		EFNB2 Y304	INSR Y1185	35		PTPRA Y798	PTK2 Y576	40		TNK2 Y859	DYRK1A Y321	15		MAPK1 Y187	DSC3 Y818	29
AFAP1L2 Y413	ERBB2IP Y1104	14		AFAP1L2 Y413	MPZL1 Y263	7		EFNB2 Y304	MPZL1 Y263	35		BCAR3 Y266	TNK2 Y859	40		SKT Y393	GRLF1 Y1105	15		MAPK1 T185 Y187	SHC1 Y349	29
TNK2 Y859	EPHB1 Y600	13		AFAP1L2 Y413	BCAR1 Y249	7		CDK2 Y15	PTK2 Y576	35		BCAR3 Y266	SHB Y268	40		SGK223 Y413	SHC1 Y349	15		INPPL1 Y986	PTRF Y308	29
TNK2 Y859	MAPK3 Y204	13		AFAP1L2 Y413	PTPN11 Y62	7		SH2D3A Y231 S218	BCAR1 Y234	35		SGK223 Y413	MPZL1 Y263	40		MAPK14 Y182	GSK3B Y216	15		ITGB4 Y1207	PTK2 Y397	29
SKT Y393	FYN Y420	13		RIN1 Y36	MAPK3 Y204	7		GIT1 Y545	DSC3 Y818	35		BCAR1 Y387	MPZL1 Y263	40		EPHB1 Y600	MAPK3 Y204	15		TNK2 Y859	EPHB1 Y600	29
SHC1 Y427	PTPN11 Y62	13		TNK2 Y859	ALB Y164	7		PTPRA Y798	FYN Y420	35		GRLF1 Y1105	EPHB1 Y600	40		SHC1 Y349	PTK2 Y397	15		GRLF1 Y1105	ANXA2 Y238	29
SHC1 Y349 Y350	ALB Y164	13		SGK223 Y413	BCAR1 Y249	7		AFAP1L2 Y413	BCAR3 Y266	35		SHC1 Y349	PTK2 Y576	40		DYRK1A Y321	PKP3 Y176	15		PTRF Y308	STAT3 Y705	29
SH2D3A Y231 S218	ERBB2IP Y1104	13		PKP3 Y176	ALB Y164	7		MAPK1 Y187	PTPN11 Y62	35		EGFR Y1197	PTPRA Y798	39		EPHA2 Y588	MPZL1 Y263	15		STAT3 Y705	MPZL1 Y263	29
RIN1 Y36	EPHA2 Y772	13		ERBB2 Y1248	PXN Y118	6		MAPK14 Y182	ANXA2 Y238	35		EGFR Y1197	MAPK3 Y204	39		BCAR1 Y249	ERBB2IP Y1104	15		FYN Y420	ERBB2IP Y1104	29
RIN1 Y36	ALB Y164	13		TFRC Y20	GIT1 Y545	6		INSR Y1189	TFRC Y20	34		FAM59A Y453	PTK2 Y576	39		ATA2 Y20	CDK2 Y15	14		MPZL1 Y263	PTK2 Y576	29
PTPRA Y798	ANXA2 Y24	13		TFRC Y20	SGK223 Y413	6		STAT3 Y704	GSK3B Y216	34		CAV1 Y14	GRLF1 Y1105	39		ERBB2 Y1248	TFRC Y20	14		BCAR1 Y249	EGFR Y1092	29
PTPRA Y798	PKP3 Y176	13		TFRC Y20	ALB Y164	6		ERBB2 Y1248	BCAR1 Y387	34		BCAR1 Y387	EPHA2 Y588	39		ERBB2 Y1248	SHC1 Y349 Y350	14		PXN S84 Y88	SHC1 Y349 Y350	28
PIK3R2 Y464	TNK2 Y859	13		CDK2 Y15	EGFR Y1092	6		EFNB2 Y304	ANXA2 Y24	34		BCAR1 Y387	PTK2 Y397	39		ERBB2 Y1248	FYN Y420	14		ERBB2 Y1248	ITGB4 Y1207	28
MAPK3 Y204	ANXA2 Y238	13		SH2D3A Y231 S218	PTK2 Y576	6		EFNB2 Y304	ANXA2 Y30	34		EPHA2 Y588 Y594	BCAR1 Y249	39		ERBB2 Y1248	PTPN11 Y62	14		BCAR1 Y327	FAM59A Y453	28
MAPK1 Y187	TNK2 Y859	13		EPHA2 Y575	ANXA2 Y24	6		EFNB2 Y304	PTK2 Y397	34		GRLF1 Y1105	ALB Y164	39		BCAR1 Y327	ACP1 Y132	14		PIK3R2 Y464	TNK2 Y859	28
MAPK1 Y187	ANXA2 Y238	13		EPHA2 Y575	EGFR Y1172	6		EPHA2 Y575	GIT1 Y545	34		EPHA2 Y588	BCAR1 Y249	39		SHC1 Y349 Y350	PTPN11 Y62	14		EPHA2 Y575	ACP1 Y132	28
INPPL1 Y986	GSK3B Y216	13		BCAR1 Y234	SGK223 Y413	6		GIT1 Y545	PTK2 Y397	34		SHB Y268	BCAR1 Y249	39		EFNB2 Y304	MAPK3 Y204	14		GIT1 Y545	ANXA2 Y30	28
INPPL1 Y986	ANXA2 Y238	13		FAM59A Y453	MAPK3 Y204	6		BCAR1 Y234	SGK223 Y413	34		PXN S84 Y88	ANXA2 Y30	38		EPHA2 Y575	FAM59A Y453	14		BCAR1 Y234	TNK2 Y859	28
GSK3B Y216	EGFR Y1092	13		CTNND1 Y228	SGK223 Y413	6		BCAR1 Y234	GSK3B Y216	34		PXN S84 Y88	EPHA2 Y588 Y594	38		EPHA2 Y575	GPRC5A Y347	14		BCAR3 Y266	ITGB4 Y1207	28
GIT1 Y545	FAM59A Y453	13		PTPRA Y798	PTK2 Y576	6		AFAP1L2 Y413	PRPF4B Y849	34		SHC1 Y349 Y350	PTK2 Y397	38		EGFR Y1197	PXN Y118	14		SHC1 Y427	PTK2 Y576	28
GIT1 Y545	EPHA2 Y588 Y594	13		ANXA2 Y24	GPRC5A Y347	6		INPPL1 Y986	ITGB4 Y1207	34		EGFR Y1197	MAPK1 Y187	38		EGFR Y1197	SHB Y268	14		TNK2 Y859	FYN Y420	28
FYN Y420	PTPN11 Y62	13		EGFR Y1172	GPRC5A Y347	6		ITGB4 Y1207	EGFR Y1092	34		EGFR Y1197	MAPK1 T185 Y187	38		BCAR1 Y234	ERBB2IP Y1104	14		DSC3 Y818	DYRK1A Y321	28
FAM59A Y453	PTK2 Y397	13		EPHA2 Y772	SKT Y393	6		TNK2 Y859	GRLF1 Y1105	34		EGFR Y1197	BCAR1 Y387	38		FAM59A Y453	SGK223 Y413	14		SKT Y393	PTK2 Y397	28
FAM59A Y453	PTK2 Y576	13		SGK223 Y413	BCAR1 Y387	6		PXN S84 Y88	GPRC5A Y347	33		CTNND1 Y228	INSR Y1185	38		PXN Y118	EGFR Y1172	14		INSR Y1185	ERBB2IP Y1104	28
EPHB1 Y600	EGFR Y1092	13		GRLF1 Y1105	GPRC5A Y347	6		ERBB2 Y1248	BCAR3 Y266	33		AFAP1L2 Y413	SHC1 Y349	38		PXN Y118	BCAR3 Y266	14		GPRC5A Y347	ERBB2IP Y1104	28
EPHA2 Y575	TNK2 Y859	13		MAPK3 Y204	SHB Y268	6		PIK3R2 Y464	BCAR3 Y266	33		RIN1 Y36	EPHA2 Y588	38		PXN Y118	EPHA2 Y588	14		INSR Y1189	EPHA2 Y772	27
EGFR Y1197	EPHA2 Y588 Y594	13		ATA2 Y20	CDK2 Y15	5		PIK3R2 Y464	PRPF4B Y849	33		ANXA2 Y24	PTK2 Y397	38		RIN1 Y36	ITGB4 Y1207	14		STAT3 Y704	ENO1 Y44	27
EGFR Y1197	ANXA2 Y238	13		STAT3 Y704	CDK2 Y15	5		SHC1 Y349 Y350	PRPF4B Y849	33		BCAR1 Y387	EPHA2 Y588 Y594	38		MAPK1 Y187	SGK223 Y413	14		BCAR1 Y327	EPHA2 Y772	27
EGFR Y1172	EPHA2 Y588 Y594	13		TFRC Y20	AFAP1L2 Y413	5		CDK2 Y15	MAPK1 T185 Y187	33		MAPK14 Y182	BCAR1 Y249	38		MAPK1 Y187	SHB Y268	14		PIK3R2 Y464	ANXA2 Y24	27
EGFR Y1172	EPHB1 Y600	13		CDK2 Y15	EGFR Y1172	5		BCAR1 Y234	ENO1 Y44	33		SHC1 Y349	SHB Y268	38		EPHA2 Y772	ERBB2IP Y1104	14		TFRC Y20	GIT1 Y545	27
EGFR Y1172	GSK3B Y216	13		CDK2 Y15	SHC1 Y427	5		BCAR1 Y234	ANXA2 Y238	33		PTK2 Y397	BCAR1 Y249	38		TNK2 Y859	LDLR Y845	14		TFRC Y20	PKP3 Y176	27
EGFR Y1172	ANXA2 Y238	13		CDK2 Y15	ANXA2 Y30	5		FAM59A Y453	ACP1 Y132	33		EPHA2 Y575	EPHA2 Y588	37		EPHA2 Y588 Y594	MPZL1 Y263	14		CDK2 Y15	ERBB2IP Y1104	27
DSC3 Y818	SGK223 Y413	13		CDK2 Y15	INPPL1 Y986	5		AFAP1L2 Y413	ACP1 Y132	33		BCAR1 Y234	PTK2 Y397	37		MAPK14 Y182	PTPN11 Y62	14		EGFR Y1197	GRLF1 Y1105	27
CAV1 Y14	GSK3B Y216	13		CDK2 Y15	TNK2 Y859	5		BCAR3 Y266	DSC3 Y818	33		FAM59A Y453	CTNND1 Y228	37		MAPK14 Y182	ANXA2 Y238	14		CTNND1 Y228	MAPK1 Y187	27
CAV1 Y14	SHB Y268	13		CDK2 Y15	DSC3 Y818	5		MAPK1 T185 Y187	BCAR1 Y249	33		CTNND1 Y228	ALB Y164	37		MAPK3 Y204	ANXA2 Y238	14		CTNND1 Y228	FYN Y420	27
BCAR3 Y266	ENO1 Y44	13		CDK2 Y15	PKP3 Y176	5		EPHA2 Y772	CAV1 Y14	33		SKT Y393	MPZL1 Y263	37		GPRC5A Y347	PTK2 Y397	14		PTPRA Y798	ANXA2 Y24	27
BCAR3 Y266	MAPK14 Y182	13		EPHA2 Y575	INPPL1 Y986	5		DSC3 Y818	PRPF4B Y849	33		MAPK14 Y182	ANXA2 Y238	37		ATA2 Y20	SGK223 Y413	13		PXN Y118	EGFR Y1092	27
BCAR3 Y266	GPRC5A Y347	13		GIT1 Y545	CTNND1 Y228	5		CAV1 Y14	ACP1 Y132	33		EPHB1 Y600	GPRC5A Y347	37		INSR Y1189	TFRC Y20	13		ANXA2 Y24	INSR Y1185	27
BCAR1 Y387	GPRC5A Y347	13		EGFR Y1197	EPHA2 Y772	5		BCAR1 Y387	PTK2 Y397	33		EPHB1 Y600	MPZL1 Y263	37		INSR Y1189	EPHA2 Y575	13		MAPK1 Y187	TNK2 Y859	27
BCAR1 Y327	SHB Y268	13		CTNND1 Y228	AFAP1L2 Y413	5		MAPK3 Y204	PTPN11 Y62	33		BCAR1 Y327	PTK2 Y397	36		INSR Y1189	EPHA2 Y588	13		SHC1 Y427	ITGB4 Y1207	27
BCAR1 Y249	ALB Y164	13		PTPRA Y798	FYN Y420	5		ATA2 Y20	BCAR3 Y266	32		EGFR Y1197	FYN Y420	36		ERBB2 Y1248	EPHB1 Y600	13		SHC1 Y427	SHB Y268	27
BCAR1 Y234	GSK3B Y216	13		PTPRA Y798	ERBB2IP Y1104	5		INSR Y1189	GIT1 Y545	32		FAM59A Y453	GRLF1 Y1105	36		BCAR1 Y327	STAT3 Y705	13		ANXA2 Y30	DYRK1A Y321	27
ATA2 Y20	EPHB1 Y600	13		PXN Y118	PTRF Y308	5		STAT3 Y704	GRLF1 Y1105	32		PXN Y118	INSR Y1185	36		TFRC Y20	INSR Y1185	13		EPHA2 Y772	ITGB4 Y1207	27
ATA2 Y20	LDLR Y845	13		SHC1 Y427	EPHA2 Y772	5		ERBB2 Y1248	EPHA2 Y772	32		PXN Y118	SHC1 Y349	36		TFRC Y20	FYN Y420	13		ENO1 Y44	STAT3 Y705	27
ATA2 Y20	SHB Y268	13		INPPL1 Y986	GPRC5A Y347	5		ERBB2 Y1248	PRPF4B Y849	32		AFAP1L2 Y413	ANXA2 Y30	36		TFRC Y20	MPZL1 Y263	13		ENO1 Y44	SHB Y268	27
ANXA2 Y24	EPHA2 Y772	13		CAV1 Y14	ALB Y164	5		TFRC Y20	INSR Y1185	32		RIN1 Y36	PTK2 Y576	36		CRKL Y132	MAPK14 Y182	13		ITGB4 Y1207	PTK2 Y576	27
ANXA2 Y24	ALB Y164	13		SGK223 Y413	SHC1 Y349	5		EFNB2 Y304	SH2D3A Y231 S218	32		SKT Y393	INSR Y1185	36		SH2D3A Y231 S218	PTK2 Y576	13		DSC3 Y818	MAPK14 Y182	27
AFAP1L2 Y413	DSC3 Y818	13		SHC1 Y349	GPRC5A Y347	5		CDK2 Y15	EPHA2 Y575	32		DYRK1A Y321	MPZL1 Y263	36		EPHA2 Y575	INSR Y1185	13		CAV1 Y14	EPHA2 Y588	27
TNK2 Y859	GSK3B Y216	12		FYN Y420	GPRC5A Y347	5		CDK2 Y15	FAM59A Y453	32		FYN Y420	MPZL1 Y263	36		CTNND1 Y228	ALB Y164	13		SGK223 Y413	PTK2 Y397	27
STAT3 Y704	CDK2 Y15	12		GPRC5A Y347	PTK2 Y576	5		EPHA2 Y575	DYRK1A Y321	32		INSR Y1189	SH2D3A Y231 S218	35		PXN Y118	ANXA2 Y238	13		GRLF1 Y1105	PKP3 Y176	27
SHC1 Y349 Y350	PTPRA Y798	12		ATA2 Y20	EPHA2 Y575	4		GIT1 Y545	MPZL1 Y263	32		STAT3 Y704	PKP3 Y176	35		RIN1 Y36	SGK223 Y413	13		EPHB1 Y600	SHC1 Y349	27
SGK223 Y413	EPHA2 Y588	12		ATA2 Y20	EPHA2 Y772	4		AFAP1L2 Y413	EPHA2 Y772	32		TFRC Y20	MAPK1 T185 Y187	35		MAPK1 Y187	DYRK1A Y321	13		EPHB1 Y600	PKP3 Y176	27
PXN Y118	ANXA2 Y24	12		ATA2 Y20	FYN Y420	4		EPHA2 Y772	DSC3 Y818	32		EPHA2 Y575	BCAR1 Y234	35		EGFR Y1172	SGK223 Y413	13		SHC1 Y349	FYN Y420	27
PXN Y118	ERBB2IP Y1104	12		ATA2 Y20	GPRC5A Y347	4		ENO1 Y44	SKT Y393	32		EPHA2 Y575	BCAR3 Y266	35		SHC1 Y427	PTK2 Y576	13		PXN S84 Y88	ACP1 Y132	26
PXN S84 Y88	BCAR3 Y266	12		STAT3 Y704	FYN Y420	4		ITGB4 Y1207	TNK2 Y859	32		EPHA2 Y575	BCAR1 Y387	35		ITGB4 Y1207	CAV1 Y14	13		STAT3 Y704	CTNND1 Y228	26
PXN S84 Y88	BCAR1 Y387	12		ERBB2 Y1248	AFAP1L2 Y413	4		SKT Y393	GSK3B Y216	32		EPHA2 Y575	BCAR1 Y249	35		TNK2 Y859	PTK2 Y576	13		STAT3 Y704	ANXA2 Y238	26
PXN S84 Y88	FYN Y420	12		PIK3R2 Y464	FYN Y420	4		SKT Y393	ANXA2 Y238	32		CTNND1 Y228	EPHB1 Y600	35		SGK223 Y413	MAPK3 Y204	13		BCAR1 Y327	MAPK1 Y187	26
PTPRA Y798	DSC3 Y818	12		PIK3R2 Y464	PTK2 Y576	4		SGK223 Y413	PTK2 Y576	32		ANXA2 Y24	PTK2 Y576	35		INSR Y1185	EPHA2 Y588	13		SHC1 Y349 Y350	MAPK1 T185 Y187	26
PRPF4B Y849	BCAR1 Y387	12		SHC1 Y349 Y350	CDK2 Y15	4		GRLF1 Y1105	STAT3 Y705	32		MAPK1 Y187	ANXA2 Y30	35		MAPK14 Y182	BCAR1 Y249	13		EFNB2 Y304	SHB Y268	26
PRPF4B Y849	BCAR1 Y249	12		SHC1 Y349 Y350	EPHA2 Y575	4		MPZL1 Y263	BCAR1 Y249	32		ANXA2 Y30	SKT Y393	35		MAPK14 Y182	ERBB2IP Y1104	13		SH2D3A Y231 S218	ANXA2 Y24	26
MAPK3 Y204	DYRK1A Y321	12		SHC1 Y349 Y350	EPHA2 Y772	4		ATA2 Y20	FYN Y420	31		INPPL1 Y986	EPHB1 Y600	35		SHC1 Y349	PTK2 Y576	13		EGFR Y1197	PTPN11 Y62	26
MAPK3 Y204	ERBB2IP Y1104	12		SHC1 Y349 Y350	GPRC5A Y347	4		INSR Y1189	EPHA2 Y772	31		ITGB4 Y1207	PTK2 Y576	35		MAPK3 Y204	DYRK1A Y321	13		CTNND1 Y228	STAT3 Y705	26
MAPK3 Y204	PTK2 Y576	12		SHC1 Y349 Y350	ALB Y164	4		PXN S84 Y88	ANXA2 Y24	31		DSC3 Y818	ALB Y164	35		MAPK3 Y204	SHB Y268	13		ANXA2 Y24	FYN Y420	26
MAPK1 Y187	EPHA2 Y588 Y594	12		CDK2 Y15	ANXA2 Y24	4		PXN S84 Y88	PTK2 Y397	31		STAT3 Y705	PKP3 Y176	35		STAT3 Y705	SHB Y268	13		MAPK1 Y187	BCAR1 Y249	26
MAPK1 Y187	DYRK1A Y321	12		CDK2 Y15	CAV1 Y14	4		STAT3 Y704	ANXA2 Y30	31		GPRC5A Y347	PTK2 Y397	35		DYRK1A Y321	ANXA2 Y238	13		MAPK1 Y187	EGFR Y1092	26
MAPK1 Y187	ERBB2IP Y1104	12		CDK2 Y15	GRLF1 Y1105	4		BCAR1 Y327	TNK2 Y859	31		MPZL1 Y263	PTK2 Y576	35		FYN Y420	PKP3 Y176	13		EGFR Y1172	SHB Y268	26
MAPK1 Y187	PTK2 Y576	12		EPHA2 Y575	SHC1 Y427	4		BCAR1 Y327	GPRC5A Y347	31		PIK3R2 Y464	PTK2 Y576	34		FYN Y420	ANXA2 Y238	13		ANXA2 Y30	EPHB1 Y600	26
INSR Y1185	EPHA2 Y588	12		EPHA2 Y575	ANXA2 Y30	4		PIK3R2 Y464	EPHA2 Y772	31		SHC1 Y349 Y350	SH2D3A Y231 S218	34		ANXA2 Y238	PTK2 Y576	13		INPPL1 Y986	ITGB4 Y1207	26
INPPL1 Y986	EPHA2 Y588 Y594	12		EPHA2 Y575	TNK2 Y859	4		SHC1 Y349 Y350	ALB Y164	31		GIT1 Y545	TNK2 Y859	34		ERBB2 Y1248	EFNB2 Y304	12		INPPL1 Y986	GPRC5A Y347	26
FYN Y420	ACP1 Y132	12		EPHA2 Y575	CAV1 Y14	4		CDK2 Y15	CTNND1 Y228	31		FAM59A Y453	PXN Y118	34		ERBB2 Y1248	SKT Y393	12		TNK2 Y859	BCAR1 Y387	26
FYN Y420	SHB Y268	12		EPHA2 Y575	PKP3 Y176	4		EPHA2 Y575	GRLF1 Y1105	31		AFAP1L2 Y413	MAPK14 Y182	34		ERBB2 Y1248	EPHA2 Y588	12		STAT3 Y705	ANXA2 Y238	26
FYN Y420	ERBB2IP Y1104	12		EPHA2 Y575	EGFR Y1092	4		GIT1 Y545	MAPK14 Y182	31		ANXA2 Y24	EPHA2 Y588 Y594	34		BCAR1 Y327	AFAP1L2 Y413	12		LDLR Y845	ERBB2IP Y1104	26
EPHA2 Y588 Y594	MAPK3 Y204	12		GIT1 Y545	GRLF1 Y1105	4		GIT1 Y545	BCAR1 Y249	31		BCAR3 Y266	ALB Y164	34		PIK3R2 Y464	BCAR3 Y266	12		ACP1 Y132	ALB Y164	26
EPHA2 Y588 Y594	EGFR Y1092	12		EGFR Y1197	MAPK3 Y204	4		CTNND1 Y228	PRPF4B Y849	31		MAPK1 T185 Y187	DSC3 Y818	34		PIK3R2 Y464	BCAR1 Y249	12		ATA2 Y20	EPHA2 Y588	25
EPHA2 Y575	EGFR Y1197	12		FAM59A Y453	MAPK1 Y187	4		PXN Y118	FYN Y420	31		MAPK1 T185 Y187	PTPN11 Y62	34		TFRC Y20	PRPF4B Y849	12		STAT3 Y704	TFRC Y20	25
EPHA2 Y575	AFAP1L2 Y413	12		FAM59A Y453	PTK2 Y397	4		MAPK1 T185 Y187	PRPF4B Y849	31		INPPL1 Y986	EPHA2 Y588 Y594	34		TFRC Y20	MAPK3 Y204	12		STAT3 Y704	LDLR Y845	25
EPHA2 Y575	EGFR Y1172	12		PXN Y118	EPHA2 Y588 Y594	4		MAPK1 T185 Y187	EPHB1 Y600	31		EPHA2 Y772	EGFR Y1092	34		EFNB2 Y304	SGK223 Y413	12		ERBB2 Y1248	TFRC Y20	25
EGFR Y1197	GPRC5A Y347	12		PXN Y118	LDLR Y845	4		EPHA2 Y772	PTK2 Y397	31		ENO1 Y44	PTK2 Y397	34		SH2D3A Y231 S218	EPHA2 Y588	12		TFRC Y20	STAT3 Y705	25
EGFR Y1092	ANXA2 Y238	12		PXN Y118	MPZL1 Y263	4		ENO1 Y44	EPHB1 Y600	31		MAPK14 Y182	ERBB2IP Y1104	34		SH2D3A Y231 S218	PTK2 Y397	12		CRKL Y132	SHB Y268	25
CDK2 Y15	SHC1 Y427	12		PXN Y118	PTPN11 Y62	4		ENO1 Y44	ERBB2IP Y1104	31		PTRF Y308	PTK2 Y576	34		GIT1 Y545	ERBB2IP Y1104	12		EGFR Y1197	BCAR3 Y266	25
CDK2 Y15	CAV1 Y14	12		AFAP1L2 Y413	DSC3 Y818	4		ITGB4 Y1207	STAT3 Y705	31		MPZL1 Y263	EGFR Y1092	34		BCAR1 Y234	MAPK1 T185 Y187	12		FAM59A Y453	BCAR3 Y266	25
CDK2 Y15	STAT3 Y705	12		RIN1 Y36	PRPF4B Y849	4		PRPF4B Y849	PTK2 Y576	31		ALB Y164	PTK2 Y576	34		BCAR1 Y234	MAPK14 Y182	12		FAM59A Y453	BCAR1 Y387	25
CDK2 Y15	BCAR1 Y249	12		ANXA2 Y24	EPHA2 Y772	4		BCAR1 Y387	PTK2 Y576	31		SHC1 Y349 Y350	PTK2 Y576	33		CTNND1 Y228	SGK223 Y413	12		FAM59A Y453	FYN Y420	25
CAV1 Y14	DYRK1A Y321	12		MAPK1 Y187	SHB Y268	4		EPHA2 Y588 Y594	MPZL1 Y263	31		EFNB2 Y304	INPPL1 Y986	33		AFAP1L2 Y413	BCAR3 Y266	12		CTNND1 Y228	PTK2 Y397	25
CAV1 Y14	PTPN11 Y62	12		SHC1 Y427	GPRC5A Y347	4		INSR Y1185	GSK3B Y216	31		FAM59A Y453	BCAR1 Y387	33		ANXA2 Y24	SGK223 Y413	12		CTNND1 Y228	MPZL1 Y263	25
BCAR3 Y266	PRPF4B Y849	12		ANXA2 Y30	FYN Y420	4		EPHB1 Y600	GSK3B Y216	31		CTNND1 Y228	ANXA2 Y24	33		EGFR Y1172	SHB Y268	12		RIN1 Y36	ITGB4 Y1207	25
BCAR3 Y266	GRLF1 Y1105	12		ANXA2 Y30	GPRC5A Y347	4		EPHB1 Y600	ANXA2 Y238	31		RIN1 Y36	DYRK1A Y321	33		BCAR3 Y266	ACP1 Y132	12		EGFR Y1172	MAPK1 T185 Y187	25
BCAR1 Y387	MAPK14 Y182	12		ANXA2 Y30	ALB Y164	4		GSK3B Y216	PKP3 Y176	31		MAPK1 T185 Y187	LDLR Y845	33		SHC1 Y427	DYRK1A Y321	12		EGFR Y1172	EPHA2 Y588	25
BCAR1 Y327	EFNB2 Y304	12		EPHA2 Y772	GRLF1 Y1105	4		GSK3B Y216	ERBB2IP Y1104	31		MAPK1 T185 Y187	PKP3 Y176	33		INPPL1 Y986	SGK223 Y413	12		MAPK1 T185 Y187	MPZL1 Y263	25
BCAR1 Y327	GRLF1 Y1105	12		EPHA2 Y772	EGFR Y1092	4		ERBB2IP Y1104	ANXA2 Y238	31		MAPK1 T185 Y187	ACP1 Y132	33		SKT Y393	MAPK14 Y182	12		EPHA2 Y772	BCAR1 Y387	25
BCAR1 Y327	PTPN11 Y62	12		TNK2 Y859	GPRC5A Y347	4		PXN S84 Y88	SH2D3A Y231 S218	30		SHC1 Y427	PKP3 Y176	33		SKT Y393	MAPK3 Y204	12		EPHA2 Y772	MPZL1 Y263	25
ATA2 Y20	GSK3B Y216	12		DSC3 Y818	GPRC5A Y347	4		STAT3 Y704	ITGB4 Y1207	30		ANXA2 Y30	EPHA2 Y772	33		CAV1 Y14	SGK223 Y413	12		TNK2 Y859	BCAR1 Y249	25
ANXA2 Y30	GSK3B Y216	12		SKT Y393	SGK223 Y413	4		PIK3R2 Y464	ACP1 Y132	30		ANXA2 Y30	BCAR1 Y387	33		SGK223 Y413	EGFR Y1092	12		EPHA2 Y588 Y594	MAPK14 Y182	25
AFAP1L2 Y413	LDLR Y845	12		CAV1 Y14	GPRC5A Y347	4		TFRC Y20	GPRC5A Y347	30		ANXA2 Y30	BCAR1 Y249	33		PRPF4B Y849	EPHA2 Y588 Y594	12		GRLF1 Y1105	ACP1 Y132	25
AFAP1L2 Y413	PKP3 Y176	12		SGK223 Y413	EGFR Y1092	4		SH2D3A Y231 S218	BCAR3 Y266	30		BCAR1 Y387	PKP3 Y176	33		BCAR1 Y387	MAPK14 Y182	12		MAPK14 Y182	ACP1 Y132	25
TNK2 Y859	LDLR Y845	11		FYN Y420	PKP3 Y176	4		SH2D3A Y231 S218	EPHA2 Y772	30		STAT3 Y705	DYRK1A Y321	33		MAPK14 Y182	SHB Y268	12		SHC1 Y349	BCAR1 Y249	25
TNK2 Y859	SHB Y268	11		GPRC5A Y347	PKP3 Y176	4		SH2D3A Y231 S218	BCAR1 Y387	30		STAT3 Y705	EPHA2 Y588	33		SHC1 Y349	ALB Y164	12		MAPK3 Y204	EGFR Y1092	25
STAT3 Y704	PIK3R2 Y464	11		GPRC5A Y347	EGFR Y1092	4		EPHA2 Y575	MAPK1 T185 Y187	30		ALB Y164	PTPN11 Y62	33		PTRF Y308	EPHA2 Y588	12		STAT3 Y705	LDLR Y845	25
STAT3 Y704	EPHA2 Y575	11		PTK2 Y397	SHB Y268	4		EPHA2 Y575	MPZL1 Y263	30		INSR Y1189	GRLF1 Y1105	32		DYRK1A Y321	LDLR Y845	12		FYN Y420	EGFR Y1092	25
STAT3 Y704	EPHB1 Y600	11		ATA2 Y20	AFAP1L2 Y413	3		BCAR1 Y234	PTPRA Y798	30		PXN S84 Y88	EFNB2 Y304	32		LDLR Y845	PKP3 Y176	12		ATA2 Y20	PXN S84 Y88	24
SHC1 Y427	DYRK1A Y321	11		ATA2 Y20	ALB Y164	3		PTPRA Y798	SKT Y393	30		PXN S84 Y88	PTK2 Y397	32		INSR Y1189	BCAR1 Y249	11		ERBB2 Y1248	ANXA2 Y30	24
SHC1 Y349 Y350	PRPF4B Y849	11		ATA2 Y20	PTK2 Y576	3		MAPK1 T185 Y187	SKT Y393	30		STAT3 Y704	EPHA2 Y588	32		STAT3 Y704	BCAR1 Y327	11		BCAR1 Y327	TNK2 Y859	24
SGK223 Y413	PKP3 Y176	11		STAT3 Y704	PTK2 Y576	3		MAPK1 T185 Y187	ERBB2IP Y1104	30		SHC1 Y349 Y350	EPHA2 Y588 Y594	32		ERBB2 Y1248	PTK2 Y397	11		BCAR1 Y234	EPHA2 Y772	24
PXN Y118	PKP3 Y176	11		ERBB2 Y1248	GIT1 Y545	3		MAPK1 T185 Y187	ALB Y164	30		GIT1 Y545	FAM59A Y453	32		BCAR1 Y327	GPRC5A Y347	11		CTNND1 Y228	EPHA2 Y772	24
PXN S84 Y88	BCAR1 Y327	11		ERBB2 Y1248	SGK223 Y413	3		DSC3 Y818	ACP1 Y132	30		ANXA2 Y24	GRLF1 Y1105	32		PIK3R2 Y464	BCAR1 Y387	11		MAPK1 Y187	ANXA2 Y30	24
PTRF Y308	FYN Y420	11		ERBB2 Y1248	ALB Y164	3		SKT Y393	SGK223 Y413	30		INSR Y1185	ALB Y164	32		TFRC Y20	CRKL Y132	11		BCAR3 Y266	GRLF1 Y1105	24
PTPRA Y798	RIN1 Y36	11		SH2D3A Y231 S218	FYN Y420	3		GSK3B Y216	PTK2 Y397	30		FYN Y420	ERBB2IP Y1104	32		EFNB2 Y304	PTRF Y308	11		SKT Y393	LDLR Y845	24
PRPF4B Y849	PKP3 Y176	11		EPHA2 Y575	FYN Y420	3		PKP3 Y176	BCAR1 Y249	30		PKP3 Y176	BCAR1 Y249	32		EPHA2 Y575	MPZL1 Y263	11		BCAR1 Y387	ALB Y164	24
PIK3R2 Y464	BCAR1 Y234	11		EPHA2 Y575	PTK2 Y576	3		ATA2 Y20	SKT Y393	29		STAT3 Y704	SGK223 Y413	31		FAM59A Y453	PTK2 Y397	11		ERBB2IP Y1104	PTPN11 Y62	24
PIK3R2 Y464	STAT3 Y705	11		GIT1 Y545	EGFR Y1197	3		ATA2 Y20	EPHB1 Y600	29		STAT3 Y704	DYRK1A Y321	31		MAPK1 Y187	ACP1 Y132	11		ATA2 Y20	MAPK1 T185 Y187	23
MAPK3 Y204	LDLR Y845	11		GIT1 Y545	RIN1 Y36	3		INSR Y1189	EFNB2 Y304	29		CRKL Y132	PXN Y118	31		BCAR3 Y266	PTRF Y308	11		PXN S84 Y88	EPHA2 Y588	23
MAPK3 Y204	EGFR Y1092	11		GIT1 Y545	ANXA2 Y24	3		PXN S84 Y88	CRKL Y132	29		EPHA2 Y575	PTPRA Y798	31		ANXA2 Y30	PRPF4B Y849	11		BCAR1 Y327	ALB Y164	23
MAPK1 Y187	EGFR Y1172	11		GIT1 Y545	DSC3 Y818	3		PXN S84 Y88	PTRF Y308	29		GIT1 Y545	MPZL1 Y263	31		INPPL1 Y986	LDLR Y845	11		PIK3R2 Y464	EGFR Y1092	23
MAPK1 Y187	INPPL1 Y986	11		GIT1 Y545	SKT Y393	3		CDK2 Y15	RIN1 Y36	29		BCAR1 Y234	MPZL1 Y263	31		INPPL1 Y986	SHB Y268	11		TFRC Y20	PTK2 Y576	23
MAPK1 Y187	LDLR Y845	11		GIT1 Y545	SHC1 Y349	3		SH2D3A Y231 S218	GIT1 Y545	29		PXN Y118	MPZL1 Y263	31		SKT Y393	PTRF Y308	11		GIT1 Y545	MAPK14 Y182	23
MAPK1 Y187	EGFR Y1092	11		EGFR Y1197	PTPRA Y798	3		BCAR1 Y234	PXN Y118	29		ANXA2 Y24	EPHB1 Y600	31		SGK223 Y413	EPHB1 Y600	11		EGFR Y1197	ITGB4 Y1207	23
ITGB4 Y1207	BCAR1 Y249	11		EGFR Y1197	AFAP1L2 Y413	3		CTNND1 Y228	BCAR3 Y266	29		ANXA2 Y24	FYN Y420	31		EPHA2 Y588 Y594	MAPK3 Y204	11		PTPRA Y798	DYRK1A Y321	23
INSR Y1189	EPHA2 Y588	11		EGFR Y1197	MAPK1 Y187	3		PTPRA Y798	EPHB1 Y600	29		BCAR3 Y266	MPZL1 Y263	31		INSR Y1185	BCAR1 Y249	11		MAPK1 Y187	PRPF4B Y849	23
INPPL1 Y986	MAPK3 Y204	11		EGFR Y1197	PTK2 Y397	3		PTPRA Y798	ERBB2IP Y1104	29		EPHA2 Y772	FYN Y420	31		LDLR Y845	EGFR Y1092	11		MAPK1 Y187	BCAR1 Y387	23
INPPL1 Y986	GPRC5A Y347	11		BCAR1 Y234	PTK2 Y397	3		PXN Y118	SKT Y393	29		SGK223 Y413	STAT3 Y705	31		SHB Y268	EGFR Y1092	11		MAPK1 Y187	GPRC5A Y347	23
GPRC5A Y347	EGFR Y1092	11		CTNND1 Y228	MAPK1 Y187	3		MAPK1 T185 Y187	FYN Y420	29		PTRF Y308	ALB Y164	31		ATA2 Y20	PTK2 Y576	10		SHC1 Y427	PTPN11 Y62	23
FYN Y420	ANXA2 Y238	11		CTNND1 Y228	PRPF4B Y849	3		ANXA2 Y30	TNK2 Y859	29		EPHA2 Y588	PTK2 Y576	31		INSR Y1189	EPHA2 Y772	10		ANXA2 Y30	SKT Y393	23
FAM59A Y453	AFAP1L2 Y413	11		AFAP1L2 Y413	ANXA2 Y30	3		ANXA2 Y30	STAT3 Y705	29		ACP1 Y132	PTK2 Y397	31		BCAR1 Y327	FAM59A Y453	10		INPPL1 Y986	BCAR1 Y387	23
FAM59A Y453	SGK223 Y413	11		AFAP1L2 Y413	SKT Y393	3		SGK223 Y413	ERBB2IP Y1104	29		CRKL Y132	GIT1 Y545	30		BCAR1 Y327	MAPK1 T185 Y187	10		EPHA2 Y772	PTRF Y308	23
ERBB2 Y1248	BCAR3 Y266	11		AFAP1L2 Y413	GRLF1 Y1105	3		PKP3 Y176	ALB Y164	29		SHC1 Y349 Y350	EFNB2 Y304	30		BCAR1 Y327	GRLF1 Y1105	10		SKT Y393	EPHA2 Y588 Y594	23
EPHB1 Y600	STAT3 Y705	11		AFAP1L2 Y413	SHC1 Y349	3		ATA2 Y20	TFRC Y20	28		CDK2 Y15	PXN Y118	30		BCAR1 Y327	PTRF Y308	10		CAV1 Y14	EPHB1 Y600	23
EPHA2 Y575	MAPK1 Y187	11		AFAP1L2 Y413	PKP3 Y176	3		ATA2 Y20	GIT1 Y545	28		GIT1 Y545	SHC1 Y349	30		PIK3R2 Y464	EPHA2 Y575	10		EPHB1 Y600	EGFR Y1092	23
EPHA2 Y575	INPPL1 Y986	11		AFAP1L2 Y413	ERBB2IP Y1104	3		ATA2 Y20	ERBB2IP Y1104	28		RIN1 Y36	ANXA2 Y238	30		CRKL Y132	EPHA2 Y575	10		DYRK1A Y321	EGFR Y1092	23
EPHA2 Y575	SGK223 Y413	11		RIN1 Y36	MAPK1 Y187	3		BCAR1 Y327	FAM59A Y453	28		EPHA2 Y772	INSR Y1185	30		SHC1 Y349 Y350	SGK223 Y413	10		ERBB2IP Y1104	EGFR Y1092	23
EPHA2 Y575	MAPK3 Y204	11		RIN1 Y36	PTK2 Y397	3		BCAR1 Y327	ANXA2 Y24	28		CAV1 Y14	MPZL1 Y263	30		SHC1 Y349 Y350	FYN Y420	10		PXN S84 Y88	ANXA2 Y30	22
EPHA2 Y575	STAT3 Y705	11		RIN1 Y36	ALB Y164	3		TFRC Y20	ANXA2 Y24	28		INSR Y1189	CTNND1 Y228	29		SHC1 Y349 Y350	PTK2 Y576	10		PXN S84 Y88	ANXA2 Y238	22
EPHA2 Y575	EGFR Y1092	11		ANXA2 Y24	FYN Y420	3		TFRC Y20	PTK2 Y576	28		PIK3R2 Y464	RIN1 Y36	29		EFNB2 Y304	ALB Y164	10		STAT3 Y704	CRKL Y132	22
EGFR Y1197	MAPK1 Y187	11		EGFR Y1172	EPHA2 Y772	3		SHC1 Y349 Y350	BCAR1 Y387	28		TFRC Y20	ALB Y164	29		EPHA2 Y575	MAPK3 Y204	10		ERBB2 Y1248	SGK223 Y413	22
EGFR Y1197	MAPK3 Y204	11		EGFR Y1172	SGK223 Y413	3		CDK2 Y15	EGFR Y1197	28		EFNB2 Y304	FAM59A Y453	29		CTNND1 Y228	DYRK1A Y321	10		BCAR1 Y327	INPPL1 Y986	22
EGFR Y1197	SHB Y268	11		SHC1 Y427	ALB Y164	3		CDK2 Y15	INPPL1 Y986	28		EPHA2 Y575	PXN Y118	29		CTNND1 Y228	PTK2 Y576	10		BCAR1 Y327	MAPK14 Y182	22
EGFR Y1172	MAPK3 Y204	11		ANXA2 Y30	EPHA2 Y772	3		CDK2 Y15	TNK2 Y859	28		PTPRA Y798	RIN1 Y36	29		PTPRA Y798	STAT3 Y705	10		TFRC Y20	SHB Y268	22
EGFR Y1172	GPRC5A Y347	11		ANXA2 Y30	PTK2 Y576	3		CDK2 Y15	STAT3 Y705	28		PXN Y118	EGFR Y1172	29		PXN Y118	RIN1 Y36	10		CRKL Y132	STAT3 Y705	22
DSC3 Y818	PRPF4B Y849	11		INPPL1 Y986	EPHA2 Y772	3		CDK2 Y15	EGFR Y1092	28		RIN1 Y36	ITGB4 Y1207	29		PXN Y118	INPPL1 Y986	10		EPHA2 Y575	PRPF4B Y849	22
CAV1 Y14	EPHA2 Y588	11		INPPL1 Y986	SGK223 Y413	3		SH2D3A Y231 S218	GSK3B Y216	28		RIN1 Y36	PRPF4B Y849	29		PXN Y118	TNK2 Y859	10		EPHA2 Y575	ERBB2IP Y1104	22
BCAR3 Y266	MAPK1 T185 Y187	11		EPHA2 Y772	TNK2 Y859	3		PXN Y118	EPHB1 Y600	28		SHC1 Y427	EPHA2 Y588	29		PXN Y118	EGFR Y1092	10		RIN1 Y36	PTPN11 Y62	22
BCAR3 Y266	SKT Y393	11		EPHA2 Y772	DSC3 Y818	3		PXN Y118	ERBB2IP Y1104	28		MPZL1 Y263	ALB Y164	29		RIN1 Y36	SHB Y268	10		MAPK1 Y187	BCAR3 Y266	22
BCAR1 Y327	SKT Y393	11		EPHA2 Y772	CAV1 Y14	3		MAPK1 T185 Y187	SGK223 Y413	28		SHC1 Y349 Y350	EPHB1 Y600	28		BCAR3 Y266	GPRC5A Y347	10		EGFR Y1172	SKT Y393	22
BCAR1 Y327	ANXA2 Y238	11		EPHA2 Y772	SHC1 Y349	3		SGK223 Y413	EPHB1 Y600	28		CDK2 Y15	GIT1 Y545	28		SHC1 Y427	SGK223 Y413	10		EGFR Y1172	EPHB1 Y600	22
BCAR1 Y234	ENO1 Y44	11		EPHA2 Y772	PKP3 Y176	3		PRPF4B Y849	PTK2 Y397	28		EPHA2 Y575	STAT3 Y705	28		ANXA2 Y30	ENO1 Y44	10		BCAR3 Y266	MAPK14 Y182	22
BCAR1 Y234	PRPF4B Y849	11		TNK2 Y859	SGK223 Y413	3		GRLF1 Y1105	MAPK14 Y182	28		PXN Y118	PTRF Y308	28		EPHA2 Y772	INSR Y1185	10		MAPK1 T185 Y187	ACP1 Y132	22
BCAR1 Y234	EPHB1 Y600	11		DSC3 Y818	SGK223 Y413	3		GPRC5A Y347	BCAR1 Y249	28		RIN1 Y36	BCAR3 Y266	28		ITGB4 Y1207	EPHA2 Y588 Y594	10		ANXA2 Y30	EPHA2 Y588	22
ATA2 Y20	SH2D3A Y231 S218	11		PRPF4B Y849	ERBB2IP Y1104	3		ATA2 Y20	BCAR1 Y234	27		PKP3 Y176	PTK2 Y576	28		TNK2 Y859	SGK223 Y413	10		ANXA2 Y30	PTK2 Y576	22
ATA2 Y20	PTPN11 Y62	11		GRLF1 Y1105	FYN Y420	3		ERBB2 Y1248	ACP1 Y132	27		PTK2 Y397	SHB Y268	28		TNK2 Y859	SHB Y268	10		TNK2 Y859	SHB Y268	22
ANXA2 Y24	PRPF4B Y849	11		GRLF1 Y1105	ALB Y164	3		TFRC Y20	CRKL Y132	27		PXN S84 Y88	STAT3 Y704	27		MAPK14 Y182	PTK2 Y397	10		SKT Y393	GSK3B Y216	22
AFAP1L2 Y413	ANXA2 Y24	11		SHC1 Y349	FYN Y420	3		TFRC Y20	PTRF Y308	27		TFRC Y20	MAPK1 Y187	27		MAPK3 Y204	EPHA2 Y588	10		SKT Y393	ANXA2 Y238	22
STAT3 Y705	ANXA2 Y238	10		MAPK3 Y204	ERBB2IP Y1104	3		TFRC Y20	PTK2 Y397	27		CRKL Y132	ALB Y164	27		GSK3B Y216	ERBB2IP Y1104	10		CAV1 Y14	DYRK1A Y321	22
STAT3 Y704	EPHA2 Y588 Y594	10		STAT3 Y705	FYN Y420	3		CRKL Y132	BCAR1 Y249	27		SHC1 Y349 Y350	FYN Y420	27		EPHA2 Y588	ALB Y164	10		SGK223 Y413	GRLF1 Y1105	22
STAT3 Y704	ANXA2 Y238	10		FYN Y420	ANXA2 Y238	3		CDK2 Y15	MAPK1 Y187	27		SH2D3A Y231 S218	EGFR Y1197	27		PKP3 Y176	PTK2 Y576	10		SGK223 Y413	PKP3 Y176	22
SKT Y393	BCAR1 Y387	10		PKP3 Y176	PTK2 Y576	3		CDK2 Y15	EGFR Y1172	27		SH2D3A Y231 S218	ANXA2 Y30	27		INSR Y1189	BCAR1 Y387	9		PRPF4B Y849	MAPK14 Y182	22
SHC1 Y427	EPHA2 Y772	10		PTK2 Y397	ERBB2IP Y1104	3		CDK2 Y15	SHC1 Y427	27		SH2D3A Y231 S218	PTK2 Y576	27		PXN S84 Y88	SHC1 Y427	9		GRLF1 Y1105	BCAR1 Y249	22
SHC1 Y349 Y350	PXN Y118	10		ANXA2 Y238	PTK2 Y576	3		CDK2 Y15	SHC1 Y349	27		EPHA2 Y575	ITGB4 Y1207	27		STAT3 Y704	PTPRA Y798	9		MAPK14 Y182	EPHB1 Y600	22
SHC1 Y349 Y350	EPHA2 Y772	10		ATA2 Y20	GIT1 Y545	2		SH2D3A Y231 S218	PRPF4B Y849	27		EPHA2 Y575	ANXA2 Y238	27		STAT3 Y704	ITGB4 Y1207	9		MAPK3 Y204	ERBB2IP Y1104	22
SHC1 Y349	PTK2 Y576	10		ATA2 Y20	SGK223 Y413	2		RIN1 Y36	SGK223 Y413	27		GIT1 Y545	GRLF1 Y1105	27		BCAR1 Y327	MPZL1 Y263	9		PXN S84 Y88	EGFR Y1092	21
SH2D3A Y231 S218	EPHA2 Y575	10		PXN S84 Y88	BCAR1 Y327	2		INSR Y1185	BCAR1 Y249	27		INPPL1 Y986	PTK2 Y397	27		PIK3R2 Y464	EPHA2 Y772	9		STAT3 Y704	FAM59A Y453	21
SH2D3A Y231 S218	CAV1 Y14	10		PXN S84 Y88	BCAR3 Y266	2		PTRF Y308	BCAR1 Y249	27		EPHA2 Y772	MAPK14 Y182	27		EFNB2 Y304	MAPK1 Y187	9		STAT3 Y704	ANXA2 Y24	21
SGK223 Y413	SHC1 Y349	10		PXN S84 Y88	BCAR1 Y249	2		ATA2 Y20	EFNB2 Y304	26		EPHA2 Y772	MPZL1 Y263	27		EFNB2 Y304	PKP3 Y176	9		ERBB2 Y1248	ANXA2 Y24	21
PXN Y118	RIN1 Y36	10		ERBB2 Y1248	BCAR3 Y266	2		INSR Y1189	ALB Y164	26		DSC3 Y818	ERBB2IP Y1104	27		SH2D3A Y231 S218	BCAR3 Y266	9		CDK2 Y15	MAPK14 Y182	21
PXN Y118	DSC3 Y818	10		BCAR1 Y327	CDK2 Y15	2		PXN S84 Y88	AFAP1L2 Y413	26		ACP1 Y132	ALB Y164	27		GIT1 Y545	MAPK1 Y187	9		EPHA2 Y575	PTPRA Y798	21
MAPK3 Y204	PTPN11 Y62	10		BCAR1 Y327	MAPK1 Y187	2		PXN S84 Y88	MAPK14 Y182	26		PXN S84 Y88	STAT3 Y705	26		GIT1 Y545	SHC1 Y427	9		EPHA2 Y575	EGFR Y1172	21
MAPK1 Y187	PTPN11 Y62	10		BCAR1 Y327	INSR Y1185	2		STAT3 Y704	CDK2 Y15	26		PXN S84 Y88	PTK2 Y576	26		GIT1 Y545	MAPK3 Y204	9		EPHA2 Y575	CAV1 Y14	21
MAPK1 T185 Y187	FYN Y420	10		BCAR1 Y327	DYRK1A Y321	2		BCAR1 Y327	PKP3 Y176	26		TFRC Y20	MAPK3 Y204	26		FAM59A Y453	BCAR3 Y266	9		GIT1 Y545	FAM59A Y453	21
FYN Y420	LDLR Y845	10		BCAR1 Y327	ALB Y164	2		TFRC Y20	SH2D3A Y231 S218	26		CDK2 Y15	ALB Y164	26		CTNND1 Y228	BCAR1 Y387	9		BCAR1 Y234	FAM59A Y453	21
ERBB2 Y1248	SH2D3A Y231 S218	10		TFRC Y20	FYN Y420	2		SHC1 Y349 Y350	SGK223 Y413	26		GIT1 Y545	EGFR Y1172	26		PXN Y118	CAV1 Y14	9		BCAR1 Y234	MAPK1 Y187	21
ERBB2 Y1248	PXN Y118	10		SHC1 Y349 Y350	SGK223 Y413	2		CDK2 Y15	MAPK3 Y204	26		GIT1 Y545	PTRF Y308	26		AFAP1L2 Y413	EPHA2 Y588	9		FAM59A Y453	STAT3 Y705	21
EPHA2 Y772	CAV1 Y14	10		CDK2 Y15	BCAR3 Y266	2		ANXA2 Y24	BCAR1 Y249	26		EGFR Y1197	PTK2 Y397	26		MAPK1 Y187	EPHB1 Y600	9		PXN Y118	DYRK1A Y321	21
EPHA2 Y588 Y594	STAT3 Y705	10		CDK2 Y15	BCAR1 Y249	2		ITGB4 Y1207	MAPK14 Y182	26		FAM59A Y453	EPHA2 Y588 Y594	26		MAPK1 Y187	ANXA2 Y238	9		ANXA2 Y24	STAT3 Y705	21
ENO1 Y44	BCAR1 Y387	10		GIT1 Y545	FAM59A Y453	2		MAPK14 Y182	GSK3B Y216	26		FAM59A Y453	PTK2 Y397	26		EGFR Y1172	ALB Y164	9		MAPK1 Y187	EPHA2 Y588 Y594	21
EGFR Y1197	PXN Y118	10		GIT1 Y545	ANXA2 Y30	2		PXN S84 Y88	CAV1 Y14	25		CTNND1 Y228	RIN1 Y36	26		MAPK1 T185 Y187	DSC3 Y818	9		MAPK1 Y187	PTPN11 Y62	21
EGFR Y1197	DYRK1A Y321	10		GIT1 Y545	PKP3 Y176	2		STAT3 Y704	BCAR1 Y327	25		CTNND1 Y228	STAT3 Y705	26		ITGB4 Y1207	DSC3 Y818	9		BCAR3 Y266	SHB Y268	21
EGFR Y1197	PTPN11 Y62	10		GIT1 Y545	SHB Y268	2		BCAR1 Y327	ANXA2 Y30	25		PXN Y118	GRLF1 Y1105	26		ITGB4 Y1207	STAT3 Y705	9		ITGB4 Y1207	SKT Y393	21
CDK2 Y15	ANXA2 Y30	10		GIT1 Y545	ERBB2IP Y1104	2		CTNND1 Y228	SGK223 Y413	25		MAPK1 Y187	DSC3 Y818	26		CAV1 Y14	SHB Y268	9		SKT Y393	CAV1 Y14	21
BCAR3 Y266	SHB Y268	10		GIT1 Y545	EGFR Y1092	2		INPPL1 Y986	SGK223 Y413	25		MAPK1 Y187	PKP3 Y176	26		SGK223 Y413	EPHA2 Y588	9		SKT Y393	PRPF4B Y849	21
BCAR3 Y266	PTPN11 Y62	10		EGFR Y1197	PRPF4B Y849	2		SGK223 Y413	EGFR Y1092	25		MAPK1 Y187	PTPN11 Y62	26		SGK223 Y413	ERBB2IP Y1104	9		SGK223 Y413	ALB Y164	21
BCAR1 Y387	GRLF1 Y1105	10		CTNND1 Y228	FYN Y420	2		EPHA2 Y588 Y594	PKP3 Y176	25		EGFR Y1172	EPHA2 Y588 Y594	26		BCAR1 Y387	INSR Y1185	9		BCAR1 Y387	MAPK14 Y182	21
BCAR1 Y327	MAPK1 T185 Y187	10		CTNND1 Y228	PTK2 Y397	2		GSK3B Y216	MPZL1 Y263	25		SHC1 Y427	DYRK1A Y321	26		BCAR1 Y387	SHC1 Y349	9		INSR Y1189	ANXA2 Y30	20
BCAR1 Y327	ERBB2IP Y1104	10		PTPRA Y798	EGFR Y1172	2		ALB Y164	PTK2 Y576	25		BCAR1 Y387	SHC1 Y349	26		EPHB1 Y600	PTRF Y308	9		PXN S84 Y88	LDLR Y845	20
BCAR1 Y234	DYRK1A Y321	10		PTPRA Y798	STAT3 Y705	2		ATA2 Y20	BCAR1 Y387	24		MAPK14 Y182	GSK3B Y216	26		SHC1 Y349	DYRK1A Y321	9		STAT3 Y704	EFNB2 Y304	20
ATA2 Y20	EPHA2 Y588	10		PXN Y118	SHC1 Y349	2		PXN S84 Y88	PIK3R2 Y464	24		ATA2 Y20	CTNND1 Y228	25		PTRF Y308	BCAR1 Y249	9		SHC1 Y349 Y350	EPHA2 Y772	20
AFAP1L2 Y413	SHC1 Y349	10		AFAP1L2 Y413	RIN1 Y36	2		PXN S84 Y88	DSC3 Y818	24		PXN S84 Y88	PTPRA Y798	25		GSK3B Y216	EPHA2 Y588	9		SHC1 Y349 Y350	ALB Y164	20
AFAP1L2 Y413	EPHA2 Y588	10		AFAP1L2 Y413	ANXA2 Y24	2		BCAR1 Y327	INPPL1 Y986	24		PXN S84 Y88	EPHA2 Y588	25		GPRC5A Y347	BCAR1 Y249	9		EFNB2 Y304	STAT3 Y705	20
TNK2 Y859	DYRK1A Y321	9		AFAP1L2 Y413	EGFR Y1092	2		BCAR1 Y327	INSR Y1185	24		ERBB2 Y1248	CTNND1 Y228	25		ATA2 Y20	EPHA2 Y575	8		SH2D3A Y231 S218	ANXA2 Y30	20
TNK2 Y859	PTPN11 Y62	9		RIN1 Y36	SGK223 Y413	2		BCAR1 Y327	EGFR Y1092	24		EPHA2 Y575	SGK223 Y413	25		ATA2 Y20	LDLR Y845	8		FAM59A Y453	PTK2 Y397	20
TFRC Y20	FYN Y420	9		RIN1 Y36	FYN Y420	2		TFRC Y20	AFAP1L2 Y413	24		GIT1 Y545	CTNND1 Y228	25		PXN S84 Y88	MAPK1 Y187	8		PXN Y118	ERBB2IP Y1104	20
SHC1 Y349	PTK2 Y397	9		ANXA2 Y24	ALB Y164	2		TFRC Y20	CAV1 Y14	24		EGFR Y1197	EPHA2 Y588 Y594	25		STAT3 Y704	MAPK1 T185 Y187	8		EGFR Y1172	BCAR3 Y266	20
SHB Y268	EGFR Y1092	9		MAPK1 Y187	BCAR3 Y266	2		EFNB2 Y304	CTNND1 Y228	24		EGFR Y1197	PTK2 Y576	25		STAT3 Y704	PTK2 Y576	8		MAPK1 T185 Y187	ANXA2 Y30	20
SH2D3A Y231 S218	ANXA2 Y30	9		MAPK1 Y187	SKT Y393	2		EPHA2 Y575	PKP3 Y176	24		CTNND1 Y228	PXN Y118	25		ERBB2 Y1248	MAPK1 T185 Y187	8		SHC1 Y427	SKT Y393	20
SH2D3A Y231 S218	TNK2 Y859	9		MAPK1 Y187	STAT3 Y705	2		GIT1 Y545	EPHA2 Y772	24		RIN1 Y36	GRLF1 Y1105	25		ERBB2 Y1248	BCAR1 Y387	8		SHC1 Y427	GRLF1 Y1105	20
RIN1 Y36	SGK223 Y413	9		MAPK1 Y187	BCAR1 Y249	2		ENO1 Y44	ACP1 Y132	24		MAPK1 T185 Y187	ANXA2 Y30	25		BCAR1 Y327	PKP3 Y176	8		INPPL1 Y986	MAPK14 Y182	20
RIN1 Y36	PRPF4B Y849	9		MAPK1 Y187	ERBB2IP Y1104	2		INSR Y1189	GSK3B Y216	23		EPHA2 Y772	CAV1 Y14	25		PIK3R2 Y464	PTPN11 Y62	8		ITGB4 Y1207	DYRK1A Y321	20
PXN Y118	SHC1 Y349	9		EGFR Y1172	FYN Y420	2		INSR Y1189	BCAR1 Y249	23		DSC3 Y818	MAPK3 Y204	25		SHC1 Y349 Y350	EPHA2 Y575	8		TNK2 Y859	DYRK1A Y321	20
PTPRA Y798	SHC1 Y427	9		BCAR3 Y266	INSR Y1185	2		PXN S84 Y88	ERBB2 Y1248	23		SHC1 Y349	PTK2 Y397	25		SHC1 Y349 Y350	BCAR1 Y387	8		DSC3 Y818	ERBB2IP Y1104	20
PTPRA Y798	SHC1 Y349	9		BCAR3 Y266	DYRK1A Y321	2		PXN S84 Y88	FAM59A Y453	23		MAPK3 Y204	PTPN11 Y62	25		EFNB2 Y304	SHC1 Y427	8		MAPK14 Y182	BCAR1 Y249	20
MAPK3 Y204	EPHA2 Y588	9		BCAR3 Y266	ALB Y164	2		ERBB2 Y1248	TFRC Y20	23		ERBB2IP Y1104	PTPN11 Y62	25		EPHA2 Y575	CTNND1 Y228	8		MAPK14 Y182	ANXA2 Y238	20
MAPK3 Y204	ALB Y164	9		ANXA2 Y30	SGK223 Y413	2		PIK3R2 Y464	TFRC Y20	23		ATA2 Y20	GRLF1 Y1105	24		EPHA2 Y575	RIN1 Y36	8		PTRF Y308	DYRK1A Y321	20
MAPK1 Y187	EPHA2 Y588	9		TNK2 Y859	FYN Y420	2		TFRC Y20	DSC3 Y818	23		STAT3 Y704	EPHA2 Y575	24		EPHA2 Y575	SHC1 Y427	8		EPHA2 Y588	EGFR Y1092	20
MAPK1 Y187	ALB Y164	9		DSC3 Y818	FYN Y420	2		TFRC Y20	MAPK14 Y182	23		STAT3 Y704	CTNND1 Y228	24		EPHA2 Y575	CAV1 Y14	8		PKP3 Y176	MPZL1 Y263	20
MAPK1 T185 Y187	BCAR1 Y387	9		SKT Y393	PRPF4B Y849	2		MAPK1 T185 Y187	EPHA2 Y588 Y594	23		ERBB2 Y1248	SKT Y393	24		EPHA2 Y575	SHC1 Y349	8		SHB Y268	BCAR1 Y249	20
MAPK1 T185 Y187	INSR Y1185	9		SKT Y393	FYN Y420	2		CAV1 Y14	BCAR1 Y249	23		ERBB2 Y1248	GRLF1 Y1105	24		EPHA2 Y575	STAT3 Y705	8		ATA2 Y20	SHB Y268	19
INSR Y1189	MAPK1 T185 Y187	9		SKT Y393	PTK2 Y397	2		ACP1 Y132	ANXA2 Y238	23		SHC1 Y349 Y350	GIT1 Y545	24		EPHA2 Y575	PKP3 Y176	8		PXN S84 Y88	SHB Y268	19
INSR Y1189	LDLR Y845	9		CAV1 Y14	SGK223 Y413	2		ATA2 Y20	EPHA2 Y772	22		SHC1 Y349 Y350	PXN Y118	24		GIT1 Y545	EGFR Y1197	8		STAT3 Y704	GSK3B Y216	19
INSR Y1189	ERBB2IP Y1104	9		SGK223 Y413	GRLF1 Y1105	2		ATA2 Y20	GSK3B Y216	22		EPHA2 Y575	GIT1 Y545	24		CTNND1 Y228	FYN Y420	8		BCAR1 Y327	EGFR Y1172	19
INSR Y1189	PTPN11 Y62	9		SGK223 Y413	PKP3 Y176	2		PXN S84 Y88	SHC1 Y349 Y350	22		PXN Y118	ANXA2 Y24	24		CTNND1 Y228	BCAR1 Y249	8		PIK3R2 Y464	EGFR Y1172	19
INSR Y1185	LDLR Y845	9		BCAR1 Y387	PTK2 Y397	2		TFRC Y20	GIT1 Y545	22		AFAP1L2 Y413	PTK2 Y576	24		AFAP1L2 Y413	ANXA2 Y30	8		PIK3R2 Y464	CAV1 Y14	19
INSR Y1185	ERBB2IP Y1104	9		INSR Y1185	BCAR1 Y249	2		CRKL Y132	EPHA2 Y575	22		MAPK1 Y187	INSR Y1185	24		AFAP1L2 Y413	LDLR Y845	8		CDK2 Y15	SKT Y393	19
INSR Y1185	PTPN11 Y62	9		SHC1 Y349	PTK2 Y576	2		EPHA2 Y575	INSR Y1185	22		MAPK1 Y187	LDLR Y845	24		ANXA2 Y24	PTK2 Y397	8		SH2D3A Y231 S218	CTNND1 Y228	19
INPPL1 Y986	DYRK1A Y321	9		MAPK3 Y204	STAT3 Y705	2		EPHA2 Y575	PTRF Y308	22		MAPK1 Y187	ACP1 Y132	24		EGFR Y1172	PTK2 Y576	8		EPHA2 Y575	ANXA2 Y24	19
INPPL1 Y986	SHB Y268	9		PTRF Y308	FYN Y420	2		EPHA2 Y575	GPRC5A Y347	22		EGFR Y1172	FYN Y420	24		BCAR3 Y266	MAPK1 T185 Y187	8		EPHA2 Y575	ANXA2 Y30	19
INPPL1 Y986	PTPN11 Y62	9		PTRF Y308	PTK2 Y576	2		GIT1 Y545	EPHA2 Y588 Y594	22		MAPK1 T185 Y187	INSR Y1185	24		BCAR3 Y266	MAPK14 Y182	8		EPHA2 Y575	LDLR Y845	19
GIT1 Y545	DSC3 Y818	9		STAT3 Y705	PTK2 Y397	2		AFAP1L2 Y413	BCAR1 Y249	22		SHC1 Y427	INSR Y1185	24		BCAR3 Y266	MPZL1 Y263	8		EPHA2 Y575	PTPN11 Y62	19
ERBB2 Y1248	BCAR1 Y387	9		STAT3 Y705	PTK2 Y576	2		TNK2 Y859	SGK223 Y413	22		INPPL1 Y986	MAPK14 Y182	24		MAPK1 T185 Y187	STAT3 Y705	8		GIT1 Y545	RIN1 Y36	19
ENO1 Y44	BCAR1 Y249	9		DYRK1A Y321	BCAR1 Y249	2		PTK2 Y397	BCAR1 Y249	22		EPHA2 Y772	ACP1 Y132	24		ANXA2 Y30	GSK3B Y216	8		GIT1 Y545	CAV1 Y14	19
EGFR Y1197	LDLR Y845	9		EPHA2 Y588	FYN Y420	2		ATA2 Y20	PRPF4B Y849	21		ITGB4 Y1207	MAPK14 Y182	24		ANXA2 Y30	DYRK1A Y321	8		BCAR1 Y234	GRLF1 Y1105	19
EGFR Y1197	ALB Y164	9		EPHA2 Y588	PTK2 Y576	2		INSR Y1189	EPHA2 Y575	21		TNK2 Y859	EPHA2 Y588 Y594	24		INPPL1 Y986	PTK2 Y576	8		CTNND1 Y228	PTRF Y308	19
EGFR Y1172	SHB Y268	9		FYN Y420	ERBB2IP Y1104	2		INSR Y1189	EPHA2 Y588 Y594	21		GRLF1 Y1105	STAT3 Y705	24		EPHA2 Y772	GPRC5A Y347	8		AFAP1L2 Y413	PKP3 Y176	19
EGFR Y1172	PTPN11 Y62	9		FYN Y420	EGFR Y1092	2		ERBB2 Y1248	BCAR1 Y249	21		INSR Y1185	MAPK3 Y204	24		ENO1 Y44	EPHB1 Y600	8		RIN1 Y36	EPHB1 Y600	19
EGFR Y1092	PTPN11 Y62	9		BCAR1 Y249	ALB Y164	2		PIK3R2 Y464	BCAR1 Y249	21		INSR Y1185	SHB Y268	24		PRPF4B Y849	MAPK14 Y182	8		ANXA2 Y24	PTK2 Y576	19
EFNB2 Y304	BCAR3 Y266	9		INSR Y1189	BCAR1 Y327	1		CRKL Y132	EPHA2 Y588 Y594	21		MAPK14 Y182	EPHB1 Y600	24		BCAR1 Y387	GPRC5A Y347	8		BCAR3 Y266	TNK2 Y859	19
DSC3 Y818	PTK2 Y397	9		INSR Y1189	BCAR3 Y266	1		SH2D3A Y231 S218	BCAR1 Y249	21		MAPK3 Y204	PKP3 Y176	24		EPHB1 Y600	ALB Y164	8		MAPK1 T185 Y187	SHB Y268	19
CDK2 Y15	EGFR Y1197	9		INSR Y1189	BCAR1 Y249	1		BCAR1 Y234	MAPK1 T185 Y187	21		PXN S84 Y88	PRPF4B Y849	23		STAT3 Y705	PTK2 Y576	8		SHC1 Y427	ALB Y164	19
CDK2 Y15	TNK2 Y859	9		PXN S84 Y88	BCAR1 Y234	1		DSC3 Y818	BCAR1 Y249	21		STAT3 Y704	AFAP1L2 Y413	23		FYN Y420	LDLR Y845	8		ANXA2 Y30	INSR Y1185	19
BCAR1 Y327	ACP1 Y132	9		PXN S84 Y88	BCAR1 Y387	1		CAV1 Y14	ALB Y164	21		BCAR1 Y327	GRLF1 Y1105	23		EGFR Y1092	PTK2 Y576	8		ENO1 Y44	PKP3 Y176	19
BCAR1 Y234	ITGB4 Y1207	9		STAT3 Y704	GIT1 Y545	1		PRPF4B Y849	ACP1 Y132	21		EFNB2 Y304	EGFR Y1172	23		ATA2 Y20	EFNB2 Y304	7		SKT Y393	PTRF Y308	19
BCAR1 Y234	ALB Y164	9		STAT3 Y704	PXN Y118	1		EPHA2 Y588 Y594	INSR Y1185	21		EPHA2 Y575	AFAP1L2 Y413	23		ATA2 Y20	PTK2 Y397	7		SKT Y393	PTPN11 Y62	19
ATA2 Y20	CDK2 Y15	9		STAT3 Y704	SGK223 Y413	1		EPHA2 Y588 Y594	PTRF Y308	21		GIT1 Y545	ANXA2 Y24	23		INSR Y1189	BCAR1 Y234	7		SHC1 Y349	EPHA2 Y588	19
ATA2 Y20	DYRK1A Y321	9		STAT3 Y704	ALB Y164	1		EPHA2 Y588 Y594	GPRC5A Y347	21		EGFR Y1197	PXN Y118	23		STAT3 Y704	GIT1 Y545	7		GSK3B Y216	STAT3 Y705	19
ANXA2 Y24	SGK223 Y413	9		ERBB2 Y1248	BCAR1 Y327	1		PTK2 Y397	ALB Y164	21		BCAR1 Y234	STAT3 Y705	23		STAT3 Y704	SKT Y393	7		EPHA2 Y588	PKP3 Y176	19
AFAP1L2 Y413	RIN1 Y36	9		ERBB2 Y1248	BCAR1 Y249	1		ATA2 Y20	ALB Y164	20		CTNND1 Y228	BCAR3 Y266	23		ERBB2 Y1248	PXN Y118	7		PTK2 Y397	ERBB2IP Y1104	19
AFAP1L2 Y413	CAV1 Y14	9		BCAR1 Y327	CRKL Y132	1		PXN S84 Y88	GIT1 Y545	20		CTNND1 Y228	INPPL1 Y986	23		BCAR1 Y327	MAPK14 Y182	7		INSR Y1189	CTNND1 Y228	18
TNK2 Y859	EPHA2 Y588	8		BCAR1 Y327	EFNB2 Y304	1		STAT3 Y704	SGK223 Y413	20		CTNND1 Y228	SHC1 Y349	23		EFNB2 Y304	AFAP1L2 Y413	7		STAT3 Y704	PRPF4B Y849	18
TFRC Y20	BCAR3 Y266	8		BCAR1 Y327	EGFR Y1197	1		EPHA2 Y575	ANXA2 Y24	20		BCAR3 Y266	GRLF1 Y1105	23		EFNB2 Y304	ANXA2 Y24	7		BCAR1 Y327	EGFR Y1197	18
STAT3 Y705	LDLR Y845	8		BCAR1 Y327	MAPK1 T185 Y187	1		GIT1 Y545	ACP1 Y132	20		ANXA2 Y30	ALB Y164	23		EFNB2 Y304	ENO1 Y44	7		PIK3R2 Y464	MAPK14 Y182	18
STAT3 Y705	SHB Y268	8		BCAR1 Y327	EPHA2 Y772	1		PXN Y118	ACP1 Y132	20		MAPK14 Y182	STAT3 Y705	23		EFNB2 Y304	GRLF1 Y1105	7		EFNB2 Y304	GIT1 Y545	18
STAT3 Y704	SH2D3A Y231 S218	8		BCAR1 Y327	ENO1 Y44	1		EGFR Y1172	SGK223 Y413	20		MAPK3 Y204	LDLR Y845	23		EFNB2 Y304	GSK3B Y216	7		CDK2 Y15	EPHA2 Y575	18
STAT3 Y704	LDLR Y845	8		BCAR1 Y327	ITGB4 Y1207	1		SHC1 Y427	SGK223 Y413	20		MAPK3 Y204	ACP1 Y132	23		CDK2 Y15	SHC1 Y427	7		CDK2 Y15	CTNND1 Y228	18
STAT3 Y704	SHB Y268	8		BCAR1 Y327	PRPF4B Y849	1		EPHA2 Y772	PRPF4B Y849	20		ATA2 Y20	PTK2 Y397	22		SH2D3A Y231 S218	BCAR1 Y249	7		EPHA2 Y575	PXN Y118	18
SHC1 Y427	ALB Y164	8		BCAR1 Y327	MAPK14 Y182	1		SGK223 Y413	SHC1 Y349	20		INSR Y1189	RIN1 Y36	22		EPHA2 Y575	ANXA2 Y24	7		EPHA2 Y575	PKP3 Y176	18
SH2D3A Y231 S218	STAT3 Y705	8		BCAR1 Y327	EPHB1 Y600	1		SGK223 Y413	STAT3 Y705	20		STAT3 Y704	BCAR1 Y234	22		EPHA2 Y575	MAPK1 Y187	7		FAM59A Y453	BCAR1 Y249	18
SGK223 Y413	EPHA2 Y588 Y594	8		BCAR1 Y327	MAPK3 Y204	1		PRPF4B Y849	BCAR1 Y249	20		STAT3 Y704	PTPRA Y798	22		EPHA2 Y575	TNK2 Y859	7		CTNND1 Y228	INSR Y1185	18
PXN Y118	EGFR Y1172	8		BCAR1 Y327	GSK3B Y216	1		MAPK14 Y182	BCAR1 Y249	20		STAT3 Y704	BCAR3 Y266	22		EPHA2 Y575	DSC3 Y818	7		PTPRA Y798	ANXA2 Y30	18
PXN Y118	SHC1 Y427	8		BCAR1 Y327	PTK2 Y397	1		ACP1 Y132	PTPN11 Y62	20		STAT3 Y704	GRLF1 Y1105	22		EPHA2 Y575	GRLF1 Y1105	7		PTPRA Y798	ERBB2IP Y1104	18
PXN Y118	ANXA2 Y30	8		BCAR1 Y327	EGFR Y1092	1		ATA2 Y20	BCAR1 Y249	19		ERBB2 Y1248	EPHA2 Y588 Y594	22		GIT1 Y545	RIN1 Y36	7		PTPRA Y798	ALB Y164	18
PXN Y118	INPPL1 Y986	8		TFRC Y20	BCAR1 Y234	1		INSR Y1189	BCAR1 Y327	19		ERBB2 Y1248	EPHB1 Y600	22		GIT1 Y545	STAT3 Y705	7		PXN Y118	ALB Y164	18
PXN Y118	CAV1 Y14	8		TFRC Y20	PXN Y118	1		BCAR1 Y327	EPHA2 Y588	19		ERBB2 Y1248	FYN Y420	22		EGFR Y1197	ACP1 Y132	7		EGFR Y1172	BCAR1 Y387	18
PXN Y118	EGFR Y1092	8		TFRC Y20	BCAR1 Y387	1		EPHA2 Y575	PTK2 Y397	19		BCAR1 Y327	CTNND1 Y228	22		BCAR1 Y234	INSR Y1185	7		EGFR Y1172	DYRK1A Y321	18
PTPRA Y798	ANXA2 Y30	8		TFRC Y20	PTK2 Y576	1		GIT1 Y545	ANXA2 Y30	19		PIK3R2 Y464	EPHA2 Y575	22		FAM59A Y453	BCAR1 Y249	7		EGFR Y1172	PTK2 Y397	18
PTPRA Y798	CAV1 Y14	8		CRKL Y132	BCAR3 Y266	1		EGFR Y1197	SGK223 Y413	19		EFNB2 Y304	SHC1 Y349	22		PXN Y118	EPHA2 Y588 Y594	7		MAPK1 T185 Y187	EGFR Y1092	18
PRPF4B Y849	SHC1 Y349	8		CRKL Y132	BCAR1 Y249	1		AFAP1L2 Y413	EPHA2 Y588 Y594	19		EPHA2 Y575	PKP3 Y176	22		AFAP1L2 Y413	EPHB1 Y600	7		ITGB4 Y1207	GRLF1 Y1105	18
MAPK14 Y182	EPHA2 Y588	8		SHC1 Y349 Y350	PXN Y118	1		RIN1 Y36	ACP1 Y132	19		AFAP1L2 Y413	STAT3 Y705	22		RIN1 Y36	LDLR Y845	7		TNK2 Y859	EPHA2 Y588	18
LDLR Y845	EGFR Y1092	8		SHC1 Y349 Y350	FYN Y420	1		ANXA2 Y24	EPHA2 Y588 Y594	19		BCAR3 Y266	STAT3 Y705	22		RIN1 Y36	ALB Y164	7		SKT Y393	MPZL1 Y263	18
INSR Y1189	FAM59A Y453	8		SHC1 Y349 Y350	PTK2 Y576	1		ANXA2 Y30	BCAR1 Y387	19		INPPL1 Y986	GRLF1 Y1105	22		RIN1 Y36	PTK2 Y576	7		SGK223 Y413	PTK2 Y576	18
INSR Y1189	ANXA2 Y238	8		EFNB2 Y304	BCAR3 Y266	1		EPHA2 Y772	ENO1 Y44	19		DSC3 Y818	SKT Y393	22		ANXA2 Y24	SKT Y393	7		PRPF4B Y849	STAT3 Y705	18
INSR Y1185	ANXA2 Y238	8		EFNB2 Y304	BCAR1 Y249	1		EPHA2 Y772	PTPN11 Y62	19		CAV1 Y14	PTK2 Y397	22		ANXA2 Y24	LDLR Y845	7		MAPK14 Y182	LDLR Y845	18
INPPL1 Y986	LDLR Y845	8		CDK2 Y15	BCAR1 Y234	1		EPHA2 Y772	ANXA2 Y238	19		GRLF1 Y1105	SHC1 Y349	22		MAPK1 Y187	SKT Y393	7		DYRK1A Y321	PTPN11 Y62	18
INPPL1 Y986	ALB Y164	8		CDK2 Y15	BCAR1 Y387	1		EPHA2 Y588 Y594	PTK2 Y397	19		FYN Y420	SHB Y268	22		EGFR Y1172	ACP1 Y132	7		INSR Y1189	ALB Y164	17
GRLF1 Y1105	BCAR1 Y249	8		CDK2 Y15	ERBB2IP Y1104	1		BCAR1 Y249	PTPN11 Y62	19		PKP3 Y176	ALB Y164	22		ANXA2 Y30	BCAR1 Y249	7		STAT3 Y704	ACP1 Y132	17
EPHA2 Y588	FYN Y420	8		GIT1 Y545	EGFR Y1172	1		ATA2 Y20	EPHA2 Y575	18		PXN S84 Y88	PIK3R2 Y464	21		EPHA2 Y772	MPZL1 Y263	7		ERBB2 Y1248	RIN1 Y36	17
EPHA2 Y575	PXN Y118	8		GIT1 Y545	INPPL1 Y986	1		ATA2 Y20	EPHA2 Y588 Y594	18		PXN S84 Y88	ITGB4 Y1207	21		DSC3 Y818	SHB Y268	7		ERBB2 Y1248	ENO1 Y44	17
EGFR Y1197	PTPRA Y798	8		GIT1 Y545	TNK2 Y859	1		PXN S84 Y88	RIN1 Y36	18		PXN S84 Y88	ANXA2 Y238	21		DSC3 Y818	PTK2 Y576	7		ERBB2 Y1248	MAPK14 Y182	17
EGFR Y1197	EPHA2 Y772	8		GIT1 Y545	STAT3 Y705	1		BCAR1 Y327	MAPK1 Y187	18		ERBB2 Y1248	EFNB2 Y304	21		CAV1 Y14	LDLR Y845	7		PIK3R2 Y464	RIN1 Y36	17
EGFR Y1197	EPHA2 Y588	8		EGFR Y1197	BCAR3 Y266	1		BCAR1 Y327	ALB Y164	18		SHC1 Y349 Y350	CTNND1 Y228	21		SGK223 Y413	LDLR Y845	7		PIK3R2 Y464	ANXA2 Y30	17
EGFR Y1172	DYRK1A Y321	8		EGFR Y1197	BCAR1 Y249	1		PIK3R2 Y464	EPHA2 Y575	18		EFNB2 Y304	TNK2 Y859	21		BCAR1 Y387	MPZL1 Y263	7		CRKL Y132	PTK2 Y397	17
EGFR Y1172	LDLR Y845	8		BCAR1 Y234	FAM59A Y453	1		PIK3R2 Y464	EPHA2 Y588 Y594	18		EPHA2 Y575	GSK3B Y216	21		EPHB1 Y600	GSK3B Y216	7		SHC1 Y349 Y350	GRLF1 Y1105	17
EFNB2 Y304	BCAR1 Y387	8		BCAR1 Y234	CTNND1 Y228	1		SH2D3A Y231 S218	EPHA2 Y575	18		GIT1 Y545	INSR Y1185	21		SHC1 Y349	FYN Y420	7		EFNB2 Y304	PTK2 Y397	17
EFNB2 Y304	BCAR1 Y249	8		BCAR1 Y234	RIN1 Y36	1		SH2D3A Y231 S218	EPHA2 Y588 Y594	18		BCAR1 Y234	GRLF1 Y1105	21		SHC1 Y349	BCAR1 Y249	7		SH2D3A Y231 S218	EPHA2 Y575	17
DYRK1A Y321	EGFR Y1092	8		BCAR1 Y234	MAPK1 Y187	1		SH2D3A Y231 S218	ALB Y164	18		CTNND1 Y228	EGFR Y1172	21		MPZL1 Y263	BCAR1 Y249	7		SH2D3A Y231 S218	EGFR Y1197	17
CTNND1 Y228	BCAR3 Y266	8		BCAR1 Y234	EPHA2 Y772	1		EPHA2 Y575	AFAP1L2 Y413	18		CTNND1 Y228	TNK2 Y859	21		ATA2 Y20	SKT Y393	6		EPHA2 Y575	SHC1 Y427	17
CTNND1 Y228	FYN Y420	8		BCAR1 Y234	ENO1 Y44	1		EPHA2 Y575	ENO1 Y44	18		PTPRA Y798	MAPK14 Y182	21		STAT3 Y704	EPHA2 Y575	6		EPHA2 Y575	INSR Y1185	17
CDK2 Y15	EGFR Y1172	8		BCAR1 Y234	ITGB4 Y1207	1		EPHA2 Y575	DSC3 Y818	18		PTPRA Y798	STAT3 Y705	21		STAT3 Y704	PXN Y118	6		EPHA2 Y575	MAPK3 Y204	17
CDK2 Y15	INPPL1 Y986	8		BCAR1 Y234	SKT Y393	1		EPHA2 Y575	CAV1 Y14	18		EGFR Y1172	EPHB1 Y600	21		STAT3 Y704	PTK2 Y397	6		EPHA2 Y575	GSK3B Y216	17
CDK2 Y15	EGFR Y1092	8		BCAR1 Y234	PRPF4B Y849	1		EPHA2 Y575	ANXA2 Y238	18		BCAR3 Y266	SHC1 Y427	21		ERBB2 Y1248	BCAR1 Y327	6		EPHA2 Y575	GPRC5A Y347	17
CAV1 Y14	PRPF4B Y849	8		BCAR1 Y234	INSR Y1185	1		EGFR Y1197	GSK3B Y216	18		SHC1 Y427	PTK2 Y576	21		BCAR1 Y327	ANXA2 Y30	6		CTNND1 Y228	GPRC5A Y347	17
CAV1 Y14	ALB Y164	8		BCAR1 Y234	MAPK14 Y182	1		FAM59A Y453	ALB Y164	18		TNK2 Y859	SKT Y393	21		PIK3R2 Y464	BCAR1 Y234	6		CTNND1 Y228	LDLR Y845	17
BCAR3 Y266	ACP1 Y132	8		BCAR1 Y234	SHC1 Y349	1		PTPRA Y798	ACP1 Y132	18		TNK2 Y859	EPHB1 Y600	21		SHC1 Y349 Y350	EPHA2 Y772	6		CTNND1 Y228	PTPN11 Y62	17
BCAR3 Y266	ANXA2 Y238	8		BCAR1 Y234	MAPK3 Y204	1		MAPK1 T185 Y187	EPHA2 Y772	18		BCAR1 Y387	SHB Y268	21		SHC1 Y349 Y350	BCAR1 Y249	6		CTNND1 Y228	ANXA2 Y238	17
BCAR1 Y387	ACP1 Y132	8		BCAR1 Y234	GSK3B Y216	1		ENO1 Y44	EPHA2 Y588 Y594	18		GSK3B Y216	PTK2 Y576	21		CDK2 Y15	MAPK3 Y204	6		PTPRA Y798	INPPL1 Y986	17
BCAR1 Y387	PTPN11 Y62	8		BCAR1 Y234	DYRK1A Y321	1		ENO1 Y44	BCAR1 Y249	18		PTK2 Y397	EGFR Y1092	21		SH2D3A Y231 S218	EPHA2 Y772	6		EGFR Y1172	FYN Y420	17
BCAR1 Y327	TFRC Y20	8		BCAR1 Y234	SHB Y268	1		DSC3 Y818	EPHA2 Y588 Y594	18		SHB Y268	ALB Y164	21		SH2D3A Y231 S218	BCAR1 Y387	6		MAPK1 T185 Y187	ANXA2 Y238	17
BCAR1 Y327	LDLR Y845	8		BCAR1 Y234	ALB Y164	1		EPHA2 Y588 Y594	ANXA2 Y238	18		PXN S84 Y88	DYRK1A Y321	20		EPHA2 Y575	EGFR Y1197	6		ITGB4 Y1207	ALB Y164	17
ATA2 Y20	EPHA2 Y772	8		FAM59A Y453	AFAP1L2 Y413	1		FYN Y420	PTK2 Y576	18		PXN S84 Y88	EGFR Y1092	20		EPHA2 Y575	PRPF4B Y849	6		SKT Y393	MAPK3 Y204	17
ANXA2 Y30	PTK2 Y397	8		FAM59A Y453	SGK223 Y413	1		BCAR1 Y249	ANXA2 Y238	18		STAT3 Y704	MAPK14 Y182	20		GIT1 Y545	DSC3 Y818	6		CAV1 Y14	FYN Y420	17
TFRC Y20	INSR Y1185	7		FAM59A Y453	BCAR1 Y387	1		PXN S84 Y88	ENO1 Y44	17		TFRC Y20	ERBB2IP Y1104	20		GIT1 Y545	CAV1 Y14	6		EPHA2 Y588 Y594	DYRK1A Y321	17
STAT3 Y705	DYRK1A Y321	7		FAM59A Y453	FYN Y420	1		PXN S84 Y88	ANXA2 Y238	17		SHC1 Y349 Y350	GRLF1 Y1105	20		EGFR Y1197	SKT Y393	6		SHC1 Y349	SHB Y268	17
STAT3 Y705	PTPN11 Y62	7		CTNND1 Y228	PXN Y118	1		ERBB2 Y1248	EPHA2 Y575	17		EFNB2 Y304	EGFR Y1197	20		EGFR Y1197	ANXA2 Y238	6		MAPK3 Y204	ALB Y164	17
STAT3 Y704	PTPRA Y798	7		CTNND1 Y228	BCAR1 Y387	1		BCAR1 Y327	MAPK3 Y204	17		EFNB2 Y304	MAPK14 Y182	20		BCAR1 Y234	CTNND1 Y228	6		STAT3 Y705	ACP1 Y132	17
STAT3 Y704	PXN Y118	7		CTNND1 Y228	PTK2 Y576	1		BCAR1 Y327	STAT3 Y705	17		EPHA2 Y575	PRPF4B Y849	20		BCAR1 Y234	ANXA2 Y30	6		DYRK1A Y321	MPZL1 Y263	17
STAT3 Y704	PRPF4B Y849	7		PTPRA Y798	ANXA2 Y24	1		BCAR1 Y327	FYN Y420	17		EPHA2 Y575	MAPK14 Y182	20		BCAR1 Y234	SHC1 Y349	6		INSR Y1189	EGFR Y1197	16
STAT3 Y704	DYRK1A Y321	7		PTPRA Y798	INPPL1 Y986	1		TFRC Y20	ENO1 Y44	17		EGFR Y1197	CTNND1 Y228	20		FAM59A Y453	EPHA2 Y772	6		INSR Y1189	GRLF1 Y1105	16
STAT3 Y704	PTPN11 Y62	7		PTPRA Y798	GRLF1 Y1105	1		TFRC Y20	PTPN11 Y62	17		BCAR1 Y234	CTNND1 Y228	20		FAM59A Y453	BCAR1 Y387	6		ERBB2 Y1248	FAM59A Y453	16
SHC1 Y427	SGK223 Y413	7		PTPRA Y798	SHC1 Y349	1		TFRC Y20	ANXA2 Y238	17		BCAR1 Y234	ALB Y164	20		CTNND1 Y228	EPHA2 Y772	6		ERBB2 Y1248	DSC3 Y818	16
SHC1 Y427	PRPF4B Y849	7		PXN Y118	RIN1 Y36	1		SHC1 Y349 Y350	GIT1 Y545	17		ANXA2 Y24	ALB Y164	20		PXN Y118	DSC3 Y818	6		PIK3R2 Y464	PKP3 Y176	16
SHC1 Y349 Y350	GIT1 Y545	7		PXN Y118	EGFR Y1172	1		EPHA2 Y575	PRPF4B Y849	17		EGFR Y1172	GRLF1 Y1105	20		PXN Y118	STAT3 Y705	6		CDK2 Y15	DYRK1A Y321	16
SHC1 Y349 Y350	AFAP1L2 Y413	7		PXN Y118	SHC1 Y427	1		EPHA2 Y575	PTK2 Y576	17		ENO1 Y44	ALB Y164	20		BCAR3 Y266	ANXA2 Y30	6		EGFR Y1197	BCAR1 Y387	16
SHC1 Y349 Y350	SGK223 Y413	7		PXN Y118	TNK2 Y859	1		PTPRA Y798	EPHA2 Y772	17		TNK2 Y859	GRLF1 Y1105	20		BCAR3 Y266	STAT3 Y705	6		CTNND1 Y228	ITGB4 Y1207	16
SHB Y268	BCAR1 Y249	7		PXN Y118	SKT Y393	1		AFAP1L2 Y413	ALB Y164	17		TNK2 Y859	FYN Y420	20		SHC1 Y427	SKT Y393	6		PXN Y118	ANXA2 Y24	16
SH2D3A Y231 S218	EGFR Y1197	7		PXN Y118	CAV1 Y14	1		RIN1 Y36	GSK3B Y216	17		SKT Y393	ACP1 Y132	20		INPPL1 Y986	ALB Y164	6		PXN Y118	SKT Y393	16
SH2D3A Y231 S218	EGFR Y1172	7		PXN Y118	EGFR Y1092	1		EGFR Y1172	GSK3B Y216	17		EPHA2 Y588 Y594	MAPK14 Y182	20		EPHA2 Y772	SHC1 Y349	6		PXN Y118	GRLF1 Y1105	16
SH2D3A Y231 S218	INPPL1 Y986	7		AFAP1L2 Y413	EGFR Y1172	1		EGFR Y1172	ACP1 Y132	17		EPHA2 Y588 Y594	SHC1 Y349	20		ENO1 Y44	EPHA2 Y588 Y594	6		RIN1 Y36	FYN Y420	16
SH2D3A Y231 S218	EGFR Y1092	7		AFAP1L2 Y413	INPPL1 Y986	1		BCAR3 Y266	PTK2 Y576	17		MAPK14 Y182	DYRK1A Y321	20		ENO1 Y44	ANXA2 Y238	6		ANXA2 Y24	MAPK3 Y204	16
RIN1 Y36	PTK2 Y576	7		AFAP1L2 Y413	TNK2 Y859	1		SHC1 Y427	GSK3B Y216	17		STAT3 Y705	ALB Y164	20		TNK2 Y859	ACP1 Y132	6		MAPK1 Y187	EPHA2 Y588	16
PXN Y118	TNK2 Y859	7		AFAP1L2 Y413	SHB Y268	1		SHC1 Y427	ACP1 Y132	17		STAT3 Y704	BCAR1 Y327	19		DSC3 Y818	ALB Y164	6		ANXA2 Y30	FYN Y420	16
PXN Y118	STAT3 Y705	7		RIN1 Y36	BCAR1 Y387	1		ANXA2 Y30	SGK223 Y413	17		BCAR1 Y327	STAT3 Y705	19		SKT Y393	STAT3 Y705	6		ANXA2 Y30	PTK2 Y397	16
PXN S84 Y88	BCAR1 Y249	7		RIN1 Y36	PTK2 Y576	1		ENO1 Y44	ALB Y164	17		PIK3R2 Y464	MAPK14 Y182	19		CAV1 Y14	ALB Y164	6		ANXA2 Y30	ALB Y164	16
PTPRA Y798	EGFR Y1172	7		ANXA2 Y24	SGK223 Y413	1		SKT Y393	PTK2 Y576	17		TFRC Y20	SKT Y393	19		CAV1 Y14	PTK2 Y576	6		ENO1 Y44	PTK2 Y576	16
PTPRA Y798	INPPL1 Y986	7		ANXA2 Y24	MAPK3 Y204	1		CAV1 Y14	EPHA2 Y588 Y594	17		CRKL Y132	EPHA2 Y772	19		BCAR1 Y387	GRLF1 Y1105	6		MAPK14 Y182	EGFR Y1092	16
PTPRA Y798	STAT3 Y705	7		MAPK1 Y187	BCAR1 Y387	1		SGK223 Y413	BCAR1 Y249	17		CDK2 Y15	SKT Y393	19		ALB Y164	EGFR Y1092	6		SHC1 Y349	DYRK1A Y321	16
PTPRA Y798	EGFR Y1092	7		MAPK1 Y187	EGFR Y1092	1		PRPF4B Y849	ALB Y164	17		SH2D3A Y231 S218	INSR Y1185	19		ALB Y164	ANXA2 Y238	6		MAPK3 Y204	DYRK1A Y321	16
PRPF4B Y849	STAT3 Y705	7		EGFR Y1172	MAPK3 Y204	1		EPHA2 Y588 Y594	PTK2 Y576	17		SH2D3A Y231 S218	STAT3 Y705	19		PXN S84 Y88	RIN1 Y36	5		GSK3B Y216	DYRK1A Y321	16
INSR Y1189	TFRC Y20	7		EGFR Y1172	PTK2 Y576	1		SHC1 Y349	ACP1 Y132	17		GIT1 Y545	EGFR Y1197	19		ERBB2 Y1248	BCAR1 Y234	5		ATA2 Y20	SKT Y393	15
INPPL1 Y986	EPHA2 Y772	7		BCAR3 Y266	MAPK1 T185 Y187	1		ALB Y164	ANXA2 Y238	17		EGFR Y1197	GRLF1 Y1105	19		ERBB2 Y1248	BCAR3 Y266	5		ATA2 Y20	DYRK1A Y321	15
INPPL1 Y986	EPHA2 Y588	7		BCAR3 Y266	EPHA2 Y772	1		PXN S84 Y88	PXN Y118	16		PTPRA Y798	SHC1 Y427	19		ERBB2 Y1248	EPHA2 Y772	5		PXN S84 Y88	EPHA2 Y575	15
GPRC5A Y347	BCAR1 Y249	7		BCAR3 Y266	ENO1 Y44	1		PXN S84 Y88	PTPN11 Y62	16		SKT Y393	LDLR Y845	19		ERBB2 Y1248	SGK223 Y413	5		PXN S84 Y88	ITGB4 Y1207	15
GIT1 Y545	RIN1 Y36	7		BCAR3 Y266	ITGB4 Y1207	1		ERBB2 Y1248	EPHA2 Y588 Y594	16		SKT Y393	PTPN11 Y62	19		ERBB2 Y1248	BCAR1 Y249	5		STAT3 Y704	EPHA2 Y588 Y594	15
GIT1 Y545	ANXA2 Y24	7		BCAR3 Y266	PRPF4B Y849	1		ERBB2 Y1248	ALB Y164	16		CAV1 Y14	ALB Y164	19		BCAR1 Y327	MAPK3 Y204	5		ERBB2 Y1248	EGFR Y1172	15
GIT1 Y545	SHC1 Y349	7		BCAR3 Y266	MAPK14 Y182	1		BCAR1 Y327	EGFR Y1197	16		GPRC5A Y347	ALB Y164	19		TFRC Y20	MAPK1 Y187	5		ERBB2 Y1248	CAV1 Y14	15
GIT1 Y545	PKP3 Y176	7		BCAR3 Y266	EPHB1 Y600	1		BCAR1 Y327	EGFR Y1172	16		PXN S84 Y88	CAV1 Y14	18		TFRC Y20	SGK223 Y413	5		BCAR1 Y327	SHC1 Y427	15
FAM59A Y453	INSR Y1185	7		BCAR3 Y266	MAPK3 Y204	1		BCAR1 Y327	SHC1 Y427	16		PXN S84 Y88	EPHB1 Y600	18		TFRC Y20	ALB Y164	5		BCAR1 Y327	SHB Y268	15
EPHA2 Y772	TNK2 Y859	7		BCAR3 Y266	GSK3B Y216	1		BCAR1 Y327	SHC1 Y349	16		PXN S84 Y88	FYN Y420	18		EFNB2 Y304	EGFR Y1197	5		CRKL Y132	GIT1 Y545	15
EPHA2 Y772	EGFR Y1092	7		BCAR3 Y266	PTK2 Y397	1		BCAR1 Y327	BCAR1 Y249	16		STAT3 Y704	BCAR1 Y387	18		EFNB2 Y304	EGFR Y1172	5		SH2D3A Y231 S218	ALB Y164	15
EPHA2 Y588 Y594	FYN Y420	7		MAPK1 T185 Y187	BCAR1 Y249	1		BCAR1 Y327	PTK2 Y576	16		ERBB2 Y1248	PTK2 Y397	18		CDK2 Y15	EGFR Y1197	5		EPHA2 Y575	EGFR Y1092	15
EPHA2 Y588	EGFR Y1092	7		SHC1 Y427	SGK223 Y413	1		PIK3R2 Y464	ALB Y164	16		CRKL Y132	SKT Y393	18		CDK2 Y15	MAPK1 Y187	5		GIT1 Y545	EGFR Y1172	15
EGFR Y1197	AFAP1L2 Y413	7		SHC1 Y427	PRPF4B Y849	1		TFRC Y20	SHC1 Y349 Y350	16		SHC1 Y349 Y350	ALB Y164	18		EPHA2 Y575	EGFR Y1172	5		EGFR Y1197	INSR Y1185	15
EGFR Y1172	EPHA2 Y772	7		SHC1 Y427	FYN Y420	1		TFRC Y20	PXN Y118	16		CDK2 Y15	EPHA2 Y772	18		EPHA2 Y575	INPPL1 Y986	5		PTPRA Y798	GRLF1 Y1105	15
EGFR Y1172	EPHA2 Y588	7		SHC1 Y427	PTK2 Y576	1		EFNB2 Y304	PTK2 Y576	16		EGFR Y1197	EPHB1 Y600	18		EPHA2 Y575	ITGB4 Y1207	5		ANXA2 Y24	BCAR3 Y266	15
EGFR Y1172	ALB Y164	7		INPPL1 Y986	FYN Y420	1		EPHA2 Y575	PTPRA Y798	16		BCAR1 Y234	MAPK14 Y182	18		EPHA2 Y575	PTRF Y308	5		MAPK1 Y187	CAV1 Y14	15
EFNB2 Y304	MAPK1 Y187	7		EPHA2 Y772	BCAR1 Y387	1		EPHA2 Y575	PTPN11 Y62	16		FAM59A Y453	ALB Y164	18		EPHA2 Y575	EGFR Y1092	5		EGFR Y1172	BCAR1 Y249	15
EFNB2 Y304	MAPK3 Y204	7		EPHA2 Y772	BCAR1 Y249	1		GIT1 Y545	PTK2 Y576	16		CTNND1 Y228	SHC1 Y427	18		EGFR Y1197	EPHB1 Y600	5		BCAR3 Y266	SHC1 Y427	15
DSC3 Y818	PTK2 Y576	7		EPHA2 Y772	ERBB2IP Y1104	1		EGFR Y1197	ACP1 Y132	16		SKT Y393	PTRF Y308	18		EGFR Y1197	PTK2 Y397	5		BCAR3 Y266	ERBB2IP Y1104	15
CRKL Y132	BCAR1 Y387	7		ENO1 Y44	BCAR1 Y387	1		PTPRA Y798	EPHA2 Y588 Y594	16		SKT Y393	PTK2 Y576	18		AFAP1L2 Y413	ANXA2 Y238	5		BCAR3 Y266	EGFR Y1092	15
CRKL Y132	BCAR1 Y249	7		ENO1 Y44	BCAR1 Y249	1		PTPRA Y798	BCAR1 Y249	16		PRPF4B Y849	MAPK14 Y182	18		RIN1 Y36	ACP1 Y132	5		MAPK1 T185 Y187	LDLR Y845	15
BCAR3 Y266	ERBB2IP Y1104	7		ITGB4 Y1207	BCAR1 Y387	1		PXN Y118	EPHA2 Y772	16		BCAR1 Y387	MAPK14 Y182	18		ANXA2 Y24	EPHA2 Y772	5		SHC1 Y427	EPHB1 Y600	15
BCAR1 Y387	EPHA2 Y588	7		ITGB4 Y1207	BCAR1 Y249	1		ANXA2 Y30	PRPF4B Y849	16		SHC1 Y349	ALB Y164	18		ANXA2 Y24	BCAR1 Y387	5		ITGB4 Y1207	PKP3 Y176	15
BCAR1 Y387	SHB Y268	7		TNK2 Y859	PTK2 Y576	1		EPHA2 Y772	SGK223 Y413	16		MAPK3 Y204	STAT3 Y705	18		MAPK1 Y187	EPHA2 Y588	5		TNK2 Y859	SKT Y393	15
BCAR1 Y327	EPHA2 Y588 Y594	7		DSC3 Y818	PTK2 Y576	1		EPHA2 Y772	GSK3B Y216	16		BCAR1 Y249	ALB Y164	18		EGFR Y1172	EPHB1 Y600	5		DSC3 Y818	PTK2 Y576	15
BCAR1 Y327	EPHA2 Y588	7		SKT Y393	BCAR1 Y387	1		DSC3 Y818	ALB Y164	16		INSR Y1189	SHB Y268	17		EGFR Y1172	ANXA2 Y238	5		SKT Y393	GPRC5A Y347	15
BCAR1 Y234	GPRC5A Y347	7		SKT Y393	PTK2 Y576	1		PRPF4B Y849	EPHA2 Y588 Y594	16		STAT3 Y704	SH2D3A Y231 S218	17		SHC1 Y427	PTK2 Y397	5		PRPF4B Y849	DYRK1A Y321	15
ATA2 Y20	PXN Y118	7		CAV1 Y14	FYN Y420	1		MAPK3 Y204	ACP1 Y132	16		STAT3 Y704	MAPK3 Y204	17		ANXA2 Y30	EPHA2 Y772	5		BCAR1 Y387	SHB Y268	15
ATA2 Y20	AFAP1L2 Y413	7		CAV1 Y14	PTK2 Y576	1		GSK3B Y216	BCAR1 Y249	16		STAT3 Y704	ALB Y164	17		ANXA2 Y30	BCAR1 Y387	5		EPHA2 Y588 Y594	STAT3 Y705	15
ANXA2 Y24	PTK2 Y576	7		SGK223 Y413	STAT3 Y705	1		BCAR1 Y327	BCAR1 Y234	15		BCAR1 Y327	ALB Y164	17		ANXA2 Y30	FYN Y420	5		GRLF1 Y1105	INSR Y1185	15
ALB Y164	EGFR Y1092	7		SGK223 Y413	SHB Y268	1		BCAR1 Y327	CTNND1 Y228	15		SH2D3A Y231 S218	SKT Y393	17		INPPL1 Y986	ACP1 Y132	5		GRLF1 Y1105	MAPK3 Y204	15
AFAP1L2 Y413	SHC1 Y427	7		SGK223 Y413	ERBB2IP Y1104	1		BCAR1 Y327	MPZL1 Y263	15		FAM59A Y453	FYN Y420	17		EPHA2 Y772	GRLF1 Y1105	5		GRLF1 Y1105	PTPN11 Y62	15
TNK2 Y859	ALB Y164	6		PRPF4B Y849	BCAR1 Y387	1		TFRC Y20	FAM59A Y453	15		PXN Y118	STAT3 Y705	17		SGK223 Y413	ANXA2 Y238	5		INSR Y1185	DYRK1A Y321	15
TFRC Y20	BCAR1 Y387	6		PRPF4B Y849	BCAR1 Y249	1		TFRC Y20	PTPRA Y798	15		MAPK1 Y187	STAT3 Y705	17		BCAR1 Y387	PKP3 Y176	5		INSR Y1185	ALB Y164	15
TFRC Y20	BCAR1 Y249	6		PRPF4B Y849	EGFR Y1092	1		TFRC Y20	PRPF4B Y849	15		EGFR Y1172	SKT Y393	17		GSK3B Y216	LDLR Y845	5		MAPK14 Y182	FYN Y420	15
STAT3 Y705	EPHA2 Y588	6		BCAR1 Y387	INSR Y1185	1		EFNB2 Y304	MAPK1 T185 Y187	15		EGFR Y1172	PTK2 Y397	17		GSK3B Y216	ANXA2 Y238	5		MAPK14 Y182	GPRC5A Y347	15
STAT3 Y704	AFAP1L2 Y413	6		BCAR1 Y387	MAPK14 Y182	1		EPHA2 Y575	PXN Y118	15		SHC1 Y427	GRLF1 Y1105	17		STAT3 Y705	PTK2 Y397	5		MAPK14 Y182	PTPN11 Y62	15
STAT3 Y704	EPHA2 Y772	6		BCAR1 Y387	SHC1 Y349	1		EPHA2 Y575	SGK223 Y413	15		EPHA2 Y772	ENO1 Y44	17		PKP3 Y176	ANXA2 Y238	5		SHC1 Y349	PTK2 Y397	15
STAT3 Y704	EPHA2 Y588	6		BCAR1 Y387	MAPK3 Y204	1		GIT1 Y545	FAM59A Y453	15		EPHA2 Y772	PTRF Y308	17		ACP1 Y132	EGFR Y1092	5		MAPK3 Y204	PKP3 Y176	15
PXN Y118	EPHA2 Y588 Y594	6		BCAR1 Y387	GSK3B Y216	1		GIT1 Y545	ALB Y164	15		EPHA2 Y772	GPRC5A Y347	17		ATA2 Y20	BCAR1 Y387	4		DYRK1A Y321	GPRC5A Y347	15
PTPRA Y798	TNK2 Y859	6		BCAR1 Y387	DYRK1A Y321	1		PXN Y118	EPHA2 Y588 Y594	15		TNK2 Y859	PTK2 Y397	17		PXN S84 Y88	EGFR Y1197	4		FYN Y420	PKP3 Y176	15
PKP3 Y176	PTK2 Y576	6		BCAR1 Y387	SHB Y268	1		PXN Y118	BCAR1 Y249	15		BCAR1 Y387	STAT3 Y705	17		STAT3 Y704	BCAR3 Y266	4		PKP3 Y176	PTPN11 Y62	15
INSR Y1189	ANXA2 Y24	6		BCAR1 Y387	ALB Y164	1		BCAR3 Y266	MAPK1 T185 Y187	15		BCAR1 Y387	ALB Y164	17		STAT3 Y704	FYN Y420	4		SHB Y268	EGFR Y1092	15
INSR Y1189	PKP3 Y176	6		EPHA2 Y588 Y594	FYN Y420	1		INPPL1 Y986	GSK3B Y216	15		ACP1 Y132	PTK2 Y576	17		BCAR1 Y327	MAPK1 Y187	4		PXN S84 Y88	CAV1 Y14	14
INSR Y1185	PKP3 Y176	6		EPHA2 Y588 Y594	PTK2 Y576	1		EPHA2 Y588 Y594	PTPN11 Y62	15		ALB Y164	EGFR Y1092	17		TFRC Y20	RIN1 Y36	4		PXN S84 Y88	GSK3B Y216	14
ERBB2 Y1248	BCAR1 Y249	6		GRLF1 Y1105	MAPK3 Y204	1		EPHB1 Y600	PTK2 Y576	15		STAT3 Y704	MAPK1 Y187	16		SHC1 Y349 Y350	BCAR1 Y234	4		ERBB2 Y1248	MAPK1 Y187	14
EPHA2 Y772	STAT3 Y705	6		MAPK14 Y182	BCAR1 Y249	1		GSK3B Y216	EGFR Y1092	15		CRKL Y132	ERBB2IP Y1104	16		EFNB2 Y304	TNK2 Y859	4		BCAR1 Y327	ANXA2 Y24	14
EGFR Y1197	SGK223 Y413	6		EPHB1 Y600	BCAR1 Y249	1		PXN S84 Y88	PTPRA Y798	14		FAM59A Y453	EPHB1 Y600	16		EPHA2 Y575	ENO1 Y44	4		SHC1 Y349 Y350	PTK2 Y397	14
DSC3 Y818	FYN Y420	6		SHC1 Y349	MAPK3 Y204	1		BCAR1 Y327	MAPK1 T185 Y187	14		RIN1 Y36	INSR Y1185	16		EPHA2 Y575	GSK3B Y216	4		CDK2 Y15	ALB Y164	14
CTNND1 Y228	BCAR1 Y387	6		SHC1 Y349	PTK2 Y397	1		SHC1 Y349 Y350	EFNB2 Y304	14		MAPK1 T185 Y187	STAT3 Y705	16		GIT1 Y545	EGFR Y1172	4		SH2D3A Y231 S218	GRLF1 Y1105	14
CTNND1 Y228	BCAR1 Y249	6		MAPK3 Y204	BCAR1 Y249	1		SHC1 Y349 Y350	EPHA2 Y575	14		EPHA2 Y772	LDLR Y845	16		GIT1 Y545	INPPL1 Y986	4		EPHA2 Y575	FAM59A Y453	14
[truncated: 279 more rows]
