# Supplementary material for: MCAM: Multiple Clustering Analysis Methodology for Deriving Hypotheses and Insights from High-Throughput Proteomic Datasets
Source: PLoS Comput Biol. 2011 Jul 21;7(7):e1002119. doi: 10.1371/journal.pcbi.1002119 (PMC3140961; doi:10.1371/journal.pcbi.1002119)
Supplement: Table S4 — Supplemental ERBB dataset comparisons. List of the sites that are in common between the EGF4 and HER2 datasets, correlations of the co-occurrence matrixes and lists of the extreme differences between sets highlighted by relationships moving from 75% or more co-occurrence to less than 25%. (XLS) [file pcbi.1002119.s009.xls]

## Sheet: Sites
In both HER2 and EGF4		In EGF4, but not HER2		In HER2, but not EGF4
TNK2 Y859		CTTN Y446		PXN S84 Y88
ERBB2 Y1248		PLCG1 Y783 Y775		PIK3R2 Y464
ACP1 Y132		EGFR Y998		CRKL Y132
BCAR1 Y327		EFNB1 Y343		CDK2 Y15
FAM59A Y453		EPHB1 Y594 Y600		SH2D3A Y231 S218
INSR Y1189		EPHA1 Y781		EPHA2 Y575
AFAP1L2 Y413		MARVELD2 Y23		EGFR Y1197
TFRC Y20		EPHB4 Y590 Y596		BCAR1 Y234
EPHA2 Y772		STAM2 Y374		CTNND1 Y228
EGFR Y1172		EGFR S1166 Y1172		ANXA2 Y24
RIN1 Y36		STAM Y381		BCAR3 Y266
ANXA2 Y30		PHLPP1 Y1712		MAPK1 T185 Y187
ENO1 Y44		TOM1L2 Y192 Y200		INPPL1 Y986
SHC1 Y349		TNS3 S332 Y354		DSC3 Y818
CAV1 Y14		ARHGEF5 Y1097 Y1100		SGK223 Y413
EPHA2 Y588 Y594		CCDC50 Y145		BCAR1 Y387
SHC1 Y349 Y350		EPHB4 Y596		GRLF1 Y1105
EGFR Y1092		TNS3 S776 Y780		INSR Y1185
SHC1 Y427		PIK3R1 Y607		MAPK14 Y182
EFNB2 Y304		CAV1 Y14 Y6 Y25		PTRF Y308
PXN Y118		DKFZp761P0423 Y411		DYRK1A Y321
EPHB1 Y600		TNK2 Y859 Y860		EPHA2 Y588
STAT3 Y705		EPHA2 Y594		FYN Y420
PTK2 Y576		EGFR Y1069 Y1092		GPRC5A Y347
BCAR1 Y249		PLCG1 Y775		LDLR Y845
ITGB4 Y1207		INPPL1 Y986 S1003		PKP3 Y176
GSK3B Y216		RBCK1 Y330		PTK2 Y397
SKT Y393		ARHGEF5 Y1097		MPZL1 Y263
STAT3 Y704		GPRC5A Y317		SHB Y268
ATA2 Y20		AHCYL1 Y28		ERBB2IP Y1104
MAPK1 Y187		EPS15 Y849		ALB Y164
MAPK3 Y204		CDC2 Y15		ANXA2 Y238
PRPF4B Y849		PKP3 Y84
PTPN11 Y62		PLEKHA6 Y492
PTPRA Y798		FRK Y497
GIT1 Y545		PKP3 Y195
		CBL Y552
		CTNND1 Y334
		PLEKHA5 Y128 Y134
		CTNND1 Y334 Y321
		PTPN18 Y389

## Sheet: Correlations
A	B	Number phosphopeptides overlap	correlation of co-occurrence matrix			EGF:EGF	EGF:HRG	HRG:HRG
Full	5minTimePoints	68	0.63
Full	24H EGF	68	0.59
EGF4	P EGF	36	0.53	EGF:EGF		0.53
EGF4	24H EGF	36	0.51	EGF:EGF		0.51
Full	24H HRG	68	0.45
Full	P HRG	68	0.39
EGF4	Full	36	0.37
P EGF	24H EGF	68	0.36	EGF:EGF		0.36
P HRG	24H HRG	68	0.35	HRG:HRG				0.35
EGF4	P HRG	36	0.35	EGF:HRG			0.35
5minTimePoints	24H HRG	68	0.34
Full	P EGF	68	0.32
5minTimePoints	24H EGF	68	0.31
EGF4	24H HRG	36	0.25	EGF:HRG			0.25
24H EGF	24H HRG	68	0.24	EGF:HRG			0.24
5minTimePoints	P HRG	68	0.23
P EGF	P HRG	68	0.23	EGF:HRG			0.23
P HRG	24H EGF	68	0.23	EGF:HRG			0.23
P EGF	24H HRG	68	0.17	EGF:HRG			0.17
EGF4	5minTimePoints	36	0.16
5minTimePoints	P EGF	68	0.1
						0.466667	0.245
LATEX Table
Full& 5minTimePoints&0.63&\\
Full& 24H EGF&0.59&\\
EGF4& P EGF&0.53&EGF:EGF\\
EGF4& 24H EGF&0.51&EGF:EGF\\
Full& 24H HRG&0.45&\\
Full& P HRG&0.39&\\
EGF4& Full&0.37&\\
P EGF& 24H EGF&0.36&EGF:EGF\\
P HRG& 24H HRG&0.35&HRG:HRG\\
EGF4& P HRG&0.35&EGF:HRG\\
5minTimePoints& 24H HRG&0.34&\\
Full& P EGF&0.32&\\
5minTimePoints& 24H EGF&0.31&\\
EGF4& 24H HRG&0.25&EGF:HRG\\
24H EGF& 24H HRG&0.24&EGF:HRG\\
5minTimePoints& P HRG&0.23&\\
P EGF& P HRG&0.23&EGF:HRG\\
P HRG& 24H EGF&0.23&EGF:HRG\\
P EGF& 24H HRG&0.17&EGF:HRG\\
EGF4& 5minTimePoints&0.16&\\
5minTimePoints& P EGF&0.1&\\

## Sheet: differences_EGF4_HER2
EGF4	HER2_Full	numOcc1(331)	numOcc2(352)	EGF4	HER2_5minTimePoints	numOcc1(331)	numOcc2(352)	EGF4	HER2_P_EGF	numOcc1(331)	numOcc2(641)	EGF4	HER2_P_HRG	numOcc1(331)	numOcc2(482)	EGF4	HER2_24H_EGF	numOcc1(331)	numOcc2(363)	EGF4	HER2_24H_HRG	numOcc1(331)	numOcc2(450)
TNK2 Y859	CAV1 Y14	11	299	FAM59A Y453	TFRC Y20	42	297	EPHA2 Y772	EFNB2 Y304	249	140	TNK2 Y859	SHC1 Y349 Y350	68	365	SHC1 Y349	SHC1 Y427	250	87	FAM59A Y453	SHC1 Y349 Y350	261	60
ENO1 Y44	PXN Y118	307	67	ACP1 Y132	EPHA2 Y772	68	275	EPHB1 Y600	GIT1 Y545	286	44	ENO1 Y44	PXN Y118	307	95	ACP1 Y132	EFNB2 Y304	44	296	FAM59A Y453	EFNB2 Y304	13	344
BCAR1 Y327	BCAR1 Y249	82	272	TFRC Y20	RIN1 Y36	31	297					SHC1 Y349 Y350	MAPK1 Y187	277	53	EPHA2 Y772	EFNB2 Y304	249	62	EPHA2 Y772	EFNB2 Y304	249	6
TNK2 Y859	ATA2 Y20	35	273	ACP1 Y132	ENO1 Y44	5	337					EFNB2 Y304	PTPRA Y798	61	408	PXN Y118	ITGB4 Y1207	66	298	ERBB2 Y1248	PTK2 Y576	1	382
SHC1 Y349 Y350	MAPK1 Y187	277	33	EPHA2 Y772	ENO1 Y44	67	268					PXN Y118	GIT1 Y545	79	431	ITGB4 Y1207	PTPN11 Y62	299	51	BCAR1 Y327	BCAR1 Y249	82	382
ITGB4 Y1207	PTPN11 Y62	299	57	TNK2 Y859	CAV1 Y14	11	331	EPHA2 Y772	EFNB2 Y304	0.752266	0.218409	EPHB1 Y600	GIT1 Y545	286	9	EPHB1 Y600	GIT1 Y545	286	73	SHC1 Y349	ATA2 Y20	68	349
AFAP1L2 Y413	PTPRA Y798	268	88	TNK2 Y859	SHC1 Y349 Y350	68	283	EPHB1 Y600	GIT1 Y545	0.864048	0.0686427									SHC1 Y349 Y350	MAPK1 Y187	277	7
EPHB1 Y600	GIT1 Y545	286	53	TNK2 Y859	SHC1 Y427	67	273													PXN Y118	MAPK3 Y204	8	426
				CAV1 Y14	SHC1 Y427	71	285													EPHA2 Y588 Y594	PRPF4B Y849	69	360
				EPHA2 Y772	EFNB2 Y304	249	75													AFAP1L2 Y413	PTPRA Y798	268	99
				ENO1 Y44	PXN Y118	307	40
				BCAR1 Y327	BCAR1 Y249	82	329
				SHC1 Y349 Y350	STAT3 Y704	32	264
				SHC1 Y427	STAT3 Y704	30	276
				ANXA2 Y30	ATA2 Y20	16	348
				SHC1 Y349 Y350	MAPK1 Y187	277	0
				EPHA2 Y772	PRPF4B Y849	78	297
				AFAP1L2 Y413	PTPRA Y798	268	17
				MAPK3 Y204	PTPRA Y798	13	305
				AFAP1L2 Y413	GIT1 Y545	69	317
				EPHB1 Y600	GIT1 Y545	286	48

## Sheet: differencesWithinHER2
HER2_P_EGF	HER2_P_HRG	numOcc1(641)	numOcc2(482)	HER2_P_EGF	HER2_24H_EGF	numOcc1(641)	numOcc2(363)	HER2_P_EGF	HER2_24H_HRG	numOcc1(641)	numOcc2(450)	HER2_P_HRG	HER2_24H_EGF	numOcc1(482)	numOcc2(363)	HER2_P_HRG	HER2_24H_HRG	numOcc1(482)	numOcc2(450)	HER2_24H_EGF	HER2_24H_HRG	numOcc1(363)	numOcc2(450)	HER2_Full	HER2_5minTimePoints	numOcc1(352)	numOcc2(352)	HER2_Full	HER2_P_EGF	numOcc1(352)	numOcc2(641)	HER2_Full	HER2_P_HRG	numOcc1(352)	numOcc2(482)	HER2_Full	HER2_24H_EGF	numOcc1(352)	numOcc2(363)	HER2_Full	HER2_24H_HRG	numOcc1(352)	numOcc2(450)	HER2_5minTimePoints	HER2_P_EGF	numOcc1(352)	numOcc2(641)	HER2_5minTimePoints	HER2_P_HRG
PXN S84 Y88	TFRC Y20	603	93	AFAP1L2 Y413	DSC3 Y818	611	41	CRKL Y132	EFNB2 Y304	45	362	SHC1 Y349 Y350	CTNND1 Y228	21	275	CRKL Y132	EFNB2 Y304	73	362	CRKL Y132	EFNB2 Y304	21	362	TFRC Y20	RIN1 Y36	64	297	BCAR1 Y327	BCAR1 Y234	280	15	CRKL Y132	CDK2 Y15	64	419	BCAR1 Y234	EPHA2 Y772	17	316	INSR Y1189	SH2D3A Y231 S218	49	421	PXN S84 Y88	TFRC Y20	51	603	TFRC Y20	FAM59A Y453
CRKL Y132	CDK2 Y15	76	419	BCAR1 Y234	SKT Y393	490	63	PIK3R2 Y464	SH2D3A Y231 S218	549	96	EFNB2 Y304	PTPRA Y798	408	57	CRKL Y132	CDK2 Y15	419	100	EFNB2 Y304	FAM59A Y453	32	344	EFNB2 Y304	MAPK1 T185 Y187	70	329	PIK3R2 Y464	AFAP1L2 Y413	66	607	EFNB2 Y304	PTPRA Y798	47	408	PXN Y118	ITGB4 Y1207	81	298	EFNB2 Y304	FAM59A Y453	39	344	STAT3 Y704	SHC1 Y349 Y350	264	74	EFNB2 Y304	PTPRA Y798
PIK3R2 Y464	SH2D3A Y231 S218	549	10	BCAR1 Y234	BCAR1 Y387	114	312	BCAR1 Y327	BCAR1 Y234	15	370	MAPK1 Y187	MAPK1 T185 Y187	413	78	INSR Y1189	SH2D3A Y231 S218	35	421	ATA2 Y20	ANXA2 Y24	287	79	EPHA2 Y772	ENO1 Y44	68	268	SH2D3A Y231 S218	AFAP1L2 Y413	37	566	EPHA2 Y575	EPHA2 Y588 Y594	273	47	BCAR1 Y327	BCAR1 Y387	282	82	ATA2 Y20	ANXA2 Y24	282	79	BCAR1 Y327	BCAR1 Y234	340	15	GIT1 Y545	PXN Y118
GIT1 Y545	PXN Y118	133	431	BCAR1 Y234	EPHB1 Y600	496	61	EFNB2 Y304	FAM59A Y453	12	344	BCAR1 Y234	EPHA2 Y772	8	316	EFNB2 Y304	FAM59A Y453	29	344	BCAR1 Y234	EPHA2 Y772	316	24	INSR Y1189	EPHB1 Y600	69	285	RIN1 Y36	ANXA2 Y24	274	104	TFRC Y20	PTRF Y308	76	363	EPHA2 Y772	BCAR1 Y387	23	303	EFNB2 Y304	SKT Y393	267	101	TFRC Y20	FAM59A Y453	297	15	TFRC Y20	RIN1 Y36
SH2D3A Y231 S218	AFAP1L2 Y413	566	97	BCAR1 Y234	ERBB2IP Y1104	508	14	PIK3R2 Y464	AFAP1L2 Y413	607	68	PXN Y118	ITGB4 Y1207	68	298	EFNB2 Y304	PTPRA Y798	408	77	PXN Y118	ITGB4 Y1207	298	84	INSR Y1185	EPHB1 Y600	68	269	PXN Y118	ENO1 Y44	67	497	EPHA2 Y588	LDLR Y845	299	88	EPHA2 Y575	EPHA2 Y588 Y594	273	78	EPHA2 Y575	EPHA2 Y588 Y594	273	29	PIK3R2 Y464	AFAP1L2 Y413	20	607	EFNB2 Y304	MAPK1 T185 Y187
CTNND1 Y228	MAPK1 T185 Y187	488	12	BCAR1 Y327	BCAR3 Y266	78	321	SH2D3A Y231 S218	AFAP1L2 Y413	566	47	SHC1 Y349 Y350	TNK2 Y859	365	45	GIT1 Y545	PXN Y118	431	91	EFNB2 Y304	SKT Y393	273	101	PTPRA Y798	MAPK3 Y204	78	305	ATA2 Y20	TNK2 Y859	273	85	ATA2 Y20	PKP3 Y176	268	94	CDK2 Y15	DYRK1A Y321	63	277	PRPF4B Y849	EPHA2 Y588 Y594	16	360	SH2D3A Y231 S218	AFAP1L2 Y413	18	566	MAPK1 Y187	MAPK1 T185 Y187
PXN Y118	ENO1 Y44	497	95	CRKL Y132	CAV1 Y14	517	23	BCAR1 Y327	BCAR3 Y266	78	385	RIN1 Y36	CAV1 Y14	44	329	MAPK1 Y187	MAPK1 T185 Y187	413	88	RIN1 Y36	CAV1 Y14	329	41	PTRF Y308	EPHA2 Y588	73	318	PIK3R2 Y464	DSC3 Y818	25	636	ANXA2 Y24	PKP3 Y176	286	102	FAM59A Y453	GPRC5A Y347	64	320	SH2D3A Y231 S218	INSR Y1185	49	398	GIT1 Y545	AFAP1L2 Y413	317	36	EPHA2 Y772	ENO1 Y44
SHC1 Y349 Y350	TNK2 Y859	64	365	CRKL Y132	INSR Y1185	509	56	PXN S84 Y88	MAPK1 T185 Y187	77	377	EPHA2 Y772	BCAR1 Y387	8	303	CTNND1 Y228	GRLF1 Y1105	468	52	BCAR1 Y327	BCAR1 Y387	82	421	MAPK1 Y187	PTK2 Y397	81	291	SH2D3A Y231 S218	DSC3 Y818	16	548	DSC3 Y818	PTPN11 Y62	25	402	LDLR Y845	PTPN11 Y62	328	89	EFNB2 Y304	EPHB1 Y600	278	54	TFRC Y20	RIN1 Y36	297	13	ANXA2 Y24	GRLF1 Y1105
SH2D3A Y231 S218	DSC3 Y818	548	76	CRKL Y132	GPRC5A Y347	563	60	EGFR Y1197	SHC1 Y427	566	79	CTNND1 Y228	GRLF1 Y1105	468	37	SH2D3A Y231 S218	INSR Y1185	19	398	EPHA2 Y772	BCAR1 Y387	303	25	MAPK3 Y204	PTK2 Y397	81	306	AFAP1L2 Y413	DSC3 Y818	13	611	EPHA2 Y588	PTPN11 Y62	300	101	DYRK1A Y321	PTK2 Y576	55	278	PIK3R2 Y464	FYN Y420	37	368	BCAR1 Y327	BCAR3 Y266	285	78	PTPRA Y798	MAPK3 Y204
AFAP1L2 Y413	DSC3 Y818	611	59	CTNND1 Y228	SHC1 Y349	76	341	PIK3R2 Y464	DSC3 Y818	636	68	CTNND1 Y228	SHC1 Y349	23	341	PXN Y118	INSR Y1185	36	341	PRPF4B Y849	EPHA2 Y588 Y594	12	360	GPRC5A Y347	PTK2 Y397	80	279	BCAR1 Y234	SKT Y393	3	490									EPHA2 Y588	LDLR Y845	299	108	EFNB2 Y304	MAPK1 T185 Y187	329	15	MAPK1 T185 Y187	MAPK3 Y204
BCAR1 Y234	SKT Y393	490	9	DYRK1A Y321	SHB Y268	508	62	SH2D3A Y231 S218	DSC3 Y818	548	100	TFRC Y20	PTRF Y308	363	0	PIK3R2 Y464	EPHB1 Y600	61	352	PXN Y118	INSR Y1185	46	341	EPHA2 Y588 Y594	MPZL1 Y263	36	309	TNK2 Y859	CAV1 Y14	299	76									SGK223 Y413	MPZL1 Y263	33	395	CTNND1 Y228	MAPK1 T185 Y187	86	488	CDK2 Y15	PTRF Y308
CRKL Y132	CAV1 Y14	517	79	EFNB2 Y304	ACP1 Y132	116	296	BCAR1 Y234	SKT Y393	490	7	CDK2 Y15	PTRF Y308	382	49	ATA2 Y20	SHC1 Y349	117	349	PIK3R2 Y464	EPHB1 Y600	35	352	LDLR Y845	MPZL1 Y263	72	330	AFAP1L2 Y413	SGK223 Y413	278	149									GRLF1 Y1105	ALB Y164	79	411	ATA2 Y20	ANXA2 Y30	348	63	PTRF Y308	EPHA2 Y588
BCAR1 Y234	BCAR1 Y387	114	382	EGFR Y1172	SHC1 Y349	547	73	CRKL Y132	CAV1 Y14	517	72	CDK2 Y15	DYRK1A Y321	120	277	MAPK1 T185 Y187	MAPK3 Y204	404	92	EFNB2 Y304	EPHB1 Y600	326	54	FAM59A Y453	SHB Y268	57	342	BCAR1 Y327	BCAR1 Y387	282	103									ERBB2 Y1248	PTK2 Y576	20	382	ANXA2 Y24	ANXA2 Y30	286	107	PTPRA Y798	GPRC5A Y347
ITGB4 Y1207	GRLF1 Y1105	606	81	EGFR Y1197	SHC1 Y349	524	70	BCAR1 Y327	BCAR1 Y387	103	421	FAM59A Y453	GPRC5A Y347	95	320	ENO1 Y44	GPRC5A Y347	434	106	ATA2 Y20	SHC1 Y349	44	349	RIN1 Y36	SHB Y268	25	311	BCAR1 Y234	BCAR1 Y387	335	114													PXN Y118	ENO1 Y44	40	497	ENO1 Y44	GPRC5A Y347
SKT Y393	EPHB1 Y600	629	47	ENO1 Y44	ANXA2 Y238	570	6	BCAR1 Y234	BCAR1 Y387	114	370	ENO1 Y44	GPRC5A Y347	434	57	SGK223 Y413	MPZL1 Y263	40	395	CTNND1 Y228	SHC1 Y349	341	69	ANXA2 Y24	ERBB2IP Y1104	53	267	CRKL Y132	INSR Y1185	51	509													EPHA2 Y772	ENO1 Y44	268	19	MAPK3 Y204	GPRC5A Y347
TFRC Y20	PTRF Y308	27	363	EPHA2 Y588	SHB Y268	497	77	PRPF4B Y849	EPHA2 Y588 Y594	16	360	EFNB2 Y304	ACP1 Y132	59	296	GRLF1 Y1105	ALB Y164	39	411	PXN Y118	MAPK3 Y204	48	426	PKP3 Y176	ERBB2IP Y1104	85	267	BCAR1 Y234	EPHB1 Y600	11	496													SHC1 Y349 Y350	TNK2 Y859	283	64	EPHA2 Y588 Y594	LDLR Y845
CDK2 Y15	PTRF Y308	102	382	EPHA2 Y588 Y594	ANXA2 Y238	18	282	ITGB4 Y1207	GRLF1 Y1105	606	18	DSC3 Y818	PTPN11 Y62	402	0	TFRC Y20	PTPN11 Y62	421	76	CDK2 Y15	DYRK1A Y321	277	16	PIK3R2 Y464	ANXA2 Y238	77	336	SKT Y393	FYN Y420	13	611													PIK3R2 Y464	DSC3 Y818	47	636	ATA2 Y20	PKP3 Y176
EPHA2 Y588 Y594	EPHA2 Y588	96	385	EPHA2 Y772	BCAR1 Y387	80	303	CRKL Y132	INSR Y1185	509	57	DYRK1A Y321	PTK2 Y576	42	278	DSC3 Y818	PTPN11 Y62	402	57	PIK3R2 Y464	FYN Y420	19	368					EPHB1 Y600	FYN Y420	54	601													SH2D3A Y231 S218	DSC3 Y818	8	548	ANXA2 Y24	PKP3 Y176
SKT Y393	FYN Y420	611	14	EPHB1 Y600	FYN Y420	601	16	PIK3R2 Y464	EPHB1 Y600	38	352					ERBB2 Y1248	PTK2 Y576	8	382	FAM59A Y453	GPRC5A Y347	320	67					ANXA2 Y24	GPRC5A Y347	35	531													AFAP1L2 Y413	DSC3 Y818	4	611	EPHA2 Y772	ACP1 Y132
INSR Y1185	GPRC5A Y347	554	81	EPHB1 Y600	ERBB2IP Y1104	608	57	BCAR1 Y234	EPHB1 Y600	496	70									SGK223 Y413	MPZL1 Y263	17	395					INSR Y1185	GPRC5A Y347	36	554													BCAR1 Y234	SKT Y393	1	490	MAPK1 Y187	PTK2 Y397
INSR Y1185	PKP3 Y176	487	55	FYN Y420	ERBB2IP Y1104	576	2	SKT Y393	EPHB1 Y600	629	53									GRLF1 Y1105	ALB Y164	26	411					INSR Y1185	PKP3 Y176	6	487													CTNND1 Y228	SKT Y393	334	55	MAPK3 Y204	PTK2 Y397
PXN S84 Y88	ACP1 Y132	544	98	ITGB4 Y1207	GRLF1 Y1105	606	33	ATA2 Y20	SHC1 Y349	143	349					Parental HRG vs. 24H HRG				SKT Y393	ANXA2 Y238	276	22					INSR Y1189	MPZL1 Y263	33	512													SHC1 Y427	CAV1 Y14	285	152	GPRC5A Y347	PTK2 Y397
SH2D3A Y231 S218	PTK2 Y397	521	10	PIK3R2 Y464	AFAP1L2 Y413	607	49	EGFR Y1197	SHC1 Y349	524	81									ERBB2 Y1248	PTK2 Y576	1	382					DYRK1A Y321	SHB Y268	73	508													TNK2 Y859	CAV1 Y14	331	76	EPHA2 Y588 Y594	MPZL1 Y263
DYRK1A Y321	SHB Y268	508	68	PIK3R2 Y464	DSC3 Y818	636	25	ANXA2 Y24	PTRF Y308	555	61									DYRK1A Y321	PTK2 Y576	278	74					BCAR1 Y327	BCAR1 Y249	272	16													EPHA2 Y772	PRPF4B Y849	297	20	FAM59A Y453	SHB Y268
EPHA2 Y588	SHB Y268	497	111	RIN1 Y36	CAV1 Y14	152	329	PIK3R2 Y464	FYN Y420	43	368																	BCAR1 Y387	BCAR1 Y249	328	89													BCAR1 Y327	BCAR1 Y387	338	103	RIN1 Y36	SHB Y268
BCAR1 Y234	ERBB2IP Y1104	508	12	SH2D3A Y231 S218	AFAP1L2 Y413	566	47	SKT Y393	FYN Y420	611	64																	BCAR1 Y234	ERBB2IP Y1104	2	508													BCAR1 Y234	BCAR1 Y387	346	114	ANXA2 Y24	ERBB2IP Y1104
FYN Y420	ERBB2IP Y1104	576	32	SH2D3A Y231 S218	DSC3 Y818	548	60	CRKL Y132	GPRC5A Y347	563	105																	FYN Y420	ERBB2IP Y1104	12	576													ANXA2 Y24	GRLF1 Y1105	286	109	TFRC Y20	PTPN11 Y62
TFRC Y20	PTPN11 Y62	17	421	SH2D3A Y231 S218	PTK2 Y397	521	12	ANXA2 Y24	GPRC5A Y347	531	57																	CDK2 Y15	PTPN11 Y62	34	490													ITGB4 Y1207	GRLF1 Y1105	11	606	DSC3 Y818	PTPN11 Y62
DSC3 Y818	PTPN11 Y62	65	402	SHC1 Y427	SHC1 Y349	568	87	INSR Y1185	GPRC5A Y347	554	74																	EPHA2 Y588	PTPN11 Y62	300	93													DSC3 Y818	GRLF1 Y1105	268	84	EPHA2 Y588 Y594	PTPN11 Y62
ENO1 Y44	ANXA2 Y238	570	110	SKT Y393	FYN Y420	611	19	INSR Y1185	PKP3 Y176	487	8																	ENO1 Y44	ANXA2 Y238	28	570													CRKL Y132	INSR Y1185	55	509
				SKT Y393	ERBB2IP Y1104	601	74	PXN S84 Y88	ACP1 Y132	544	26																	EPHA2 Y588 Y594	ANXA2 Y238	270	18													INSR Y1189	EPHB1 Y600	285	42
				SKT Y393	ANXA2 Y238	32	276	SH2D3A Y231 S218	PTK2 Y397	521	78																	LDLR Y845	ANXA2 Y238	278	109													BCAR1 Y234	EPHB1 Y600	0	496
EGF vs HRG in Parental				STAT3 Y704	TNK2 Y859	592	81	SGK223 Y413	MPZL1 Y263	47	395																																	SKT Y393	EPHB1 Y600	15	629
				TNK2 Y859	STAT3 Y705	593	82	DYRK1A Y321	SHB Y268	508	36																																	INSR Y1185	EPHB1 Y600	269	48
								BCAR1 Y327	BCAR1 Y249	16	382																																	PTPRA Y798	MAPK3 Y204	305	110
								BCAR1 Y387	BCAR1 Y249	89	376																																	CRKL Y132	PTRF Y308	39	550
								BCAR1 Y234	ERBB2IP Y1104	508	10																																	ANXA2 Y24	PTRF Y308	24	555
								SKT Y393	ERBB2IP Y1104	601	107																																	SKT Y393	FYN Y420	2	611
				Parental vs. HER2 in response to EGF				EPHB1 Y600	ERBB2IP Y1104	608	50																																	EPHB1 Y600	FYN Y420	16	601
								FYN Y420	ERBB2IP Y1104	576	29																																	CRKL Y132	GPRC5A Y347	30	563
								GRLF1 Y1105	ALB Y164	42	411																																	PTPRA Y798	GPRC5A Y347	327	149
								LDLR Y845	ANXA2 Y238	109	422																																	ANXA2 Y24	GPRC5A Y347	6	531
								ERBB2 Y1248	PTK2 Y576	150	382																																	INSR Y1185	GPRC5A Y347	48	554
																																												MAPK3 Y204	GPRC5A Y347	299	93
																																												EPHA2 Y588 Y594	LDLR Y845	319	50
								Parental EGF vs. HRG 24H																																				ANXA2 Y30	PKP3 Y176	298	65
																																												INSR Y1185	PKP3 Y176	20	487
																																												TFRC Y20	ACP1 Y132	51	509
																																												ENO1 Y44	ACP1 Y132	337	24
																																												MAPK1 Y187	PTK2 Y397	291	158
																																												INSR Y1189	MPZL1 Y263	75	512
																																												EPHA2 Y588 Y594	MPZL1 Y263	309	31
																																												TFRC Y20	SHB Y268	303	78
																																												FAM59A Y453	SHB Y268	342	139
																																												RIN1 Y36	SHB Y268	311	64
																																												DYRK1A Y321	SHB Y268	27	508
																																												EPHA2 Y588	SHB Y268	62	497
																																												BCAR1 Y327	BCAR1 Y249	329	16
																																												BCAR1 Y387	BCAR1 Y249	325	89
																																												BCAR1 Y234	ERBB2IP Y1104	0	508
																																												ANXA2 Y24	ERBB2IP Y1104	267	43
																																												EPHB1 Y600	ERBB2IP Y1104	48	608
																																												FYN Y420	ERBB2IP Y1104	2	576
																																												PKP3 Y176	ERBB2IP Y1104	267	57
																																												CDK2 Y15	PTPN11 Y62	32	490
																																												EPHA2 Y588 Y594	PTPN11 Y62	294	15
																																												ENO1 Y44	ANXA2 Y238	77	570
[truncated: 10 more columns]
